# Supplementary material for: Identification of Non-Coding RNAs Associated with Telomeres Using a Combination of enChIP and RNA Sequencing
Source: PLoS One. 2015 Apr 13;10(4):e0123387. doi: 10.1371/journal.pone.0123387 (PMC4395285; doi:10.1371/journal.pone.0123387)
Supplement: S1 Table — (XLSX) [file pone.0123387.s001.xlsx]

## Sheet: result
Table S1. Non-coding RNAs associated with telomeres identified by enChIP-RNA-Seq analysis
Ensembl ID	Link to Ensembl	MGI Accession (Link to MGI)	Gene symbol	Gene description	3xFNLDD read count	3xFN-Tel-TAL read count	3xFNLDD RPM	3xFN-Tel-TAL RPM	3xFN-Tel-TAL RPM / 3xFNLDD RPM)
ENSMUST00000158656	ENSMUST00000158656	MGI:3819487	Scarna6	small Cajal body-specific RNA 6 [Source:MGI Symbol;Acc:MGI:3819487]	40	312	5.55079	31.9187	2.52364
ENSMUST00000104526	ENSMUST00000104526	MGI:3819523	Snord17	small nucleolar RNA, C/D box 17 [Source:MGI Symbol;Acc:MGI:3819523]	215	1512	29.8355	154.683	2.37421
ENSMUST00000083888	ENSMUST00000083888	MGI:3645887	Snord15a	small nucleolar RNA, C/D box 15A [Source:MGI Symbol;Acc:MGI:3645887]	26	162	3.60801	16.5732	2.19957
ENSMUST00000157343	ENSMUST00000157343	MGI:5455172	Gm25395	predicted gene, 25395 [Source:MGI Symbol;Acc:MGI:5455172]	58	338	8.04864	34.5786	2.10306
ENSMUST00000093738	ENSMUST00000093738	MGI:97987	Rnu3b3	U3B small nuclear RNA 3 [Source:MGI Symbol;Acc:MGI:97987]	12369	71578	1716.44	7322.67	2.09295
ENSMUST00000083936	ENSMUST00000083936	MGI:97977	Rnu3a	U3A small nuclear RNA [Source:MGI Symbol;Acc:MGI:97977]	1142	6400	158.475	654.742	2.04667
ENSMUST00000104423	ENSMUST00000104423	MGI:5453723	Gm23946	predicted gene, 23946 [Source:MGI Symbol;Acc:MGI:5453723]	19	103	2.63662	10.5373	1.99873
ENSMUST00000158604	ENSMUST00000158604	MGI:5454820	Gm25043	predicted gene, 25043 [Source:MGI Symbol;Acc:MGI:5454820]	31	168	4.30186	17.187	1.99828
ENSMUST00000103979	ENSMUST00000103979	MGI:5453896	Gm24119	predicted gene, 24119 [Source:MGI Symbol;Acc:MGI:5453896]	31	152	4.30186	15.5501	1.85389
ENSMUST00000082446	ENSMUST00000082446	MGI:5456225	Gm26448	predicted gene, 26448 [Source:MGI Symbol;Acc:MGI:5456225]	271	1192	37.6066	121.946	1.69718
ENSMUST00000097930	ENSMUST00000097930	MGI:3588233	B230314M03Rik	RIKEN cDNA B230314M03 gene [Source:MGI Symbol;Acc:MGI:3588233]	25	101	3.46924	10.3326	1.57452
ENSMUST00000122759	ENSMUST00000122759	MGI:5452765	Gm22988	predicted gene, 22988 [Source:MGI Symbol;Acc:MGI:5452765]	27	104	3.74678	10.6396	1.50571
ENSMUST00000133808	ENSMUST00000133808	MGI:1924939	C330006A16Rik	RIKEN cDNA C330006A16 gene [Source:MGI Symbol;Acc:MGI:1924939]	58	223	8.04864	22.8137	1.50308
ENSMUST00000158792	ENSMUST00000158792	MGI:5451786	Gm22009	predicted gene, 22009 [Source:MGI Symbol;Acc:MGI:5451786]	33	126	4.5794	12.8902	1.49305
ENSMUST00000181605	ENSMUST00000181605		AC122821.1		42	154	5.82833	15.7547	1.43463
ENSMUST00000149667	ENSMUST00000149667	MGI:1915358	9430008C03Rik	RIKEN cDNA 9430008C03 gene [Source:MGI Symbol;Acc:MGI:1915358]	88	305	12.2117	31.2025	1.3534
ENSMUST00000082517	ENSMUST00000082517	MGI:3819494	Snora23	small nucleolar RNA, H/ACA box 23 [Source:MGI Symbol;Acc:MGI:3819494]	71	244	9.85265	24.962	1.34115
ENSMUST00000158992	ENSMUST00000158992	MGI:3819482	Scarna10	small Cajal body-specific RNA 10 [Source:MGI Symbol;Acc:MGI:3819482]	93	315	12.9056	32.2256	1.32021
ENSMUST00000182423	ENSMUST00000182423		RP23		35	118	4.85694	12.0718	1.31352
ENSMUST00000101030	ENSMUST00000101030	MGI:3645786	Gm7292	predicted gene 7292 [Source:MGI Symbol;Acc:MGI:3645786]	58	190	8.04864	19.4377	1.27204
ENSMUST00000180563	ENSMUST00000180563	MGI:1919905	Snhg5	small nucleolar RNA host gene 5 [Source:MGI Symbol;Acc:MGI:1919905]	40	131	5.55079	13.4017	1.27166
ENSMUST00000183314	ENSMUST00000183314		RP23-81C12.1		377835	1218185	52432.1	124624	1.24907
ENSMUST00000086725	ENSMUST00000086725	MGI:3804932	Gm3608	predicted gene 3608 [Source:MGI Symbol;Acc:MGI:3804932]	37	119	5.13448	12.1741	1.24553
ENSMUST00000158164	ENSMUST00000158164	MGI:4360027	Scarna13	small Cajal body-specific RNA 1 [Source:MGI Symbol;Acc:MGI:4360027]	82	262	11.3791	26.8035	1.23603
ENSMUST00000182520	ENSMUST00000182520		RP23-81C12.1		109071	347206	15135.8	35520.4	1.23069
ENSMUST00000179155	ENSMUST00000179155	MGI:5454082	Gm24305	predicted gene, 24305 [Source:MGI Symbol;Acc:MGI:5454082]	40	127	5.55079	12.9925	1.22692
ENSMUST00000181002	ENSMUST00000181002		AC125483.1		35	110	4.85694	11.2534	1.21224
ENSMUST00000126219	ENSMUST00000126219	MGI:1918408	4933423P22Rik	RIKEN cDNA 4933423P22 gene [Source:MGI Symbol;Acc:MGI:1918408]	43	134	5.9671	13.7087	1.19999
ENSMUST00000159108	ENSMUST00000159108	MGI:3801887	Gm15825	predicted gene 15825 [Source:MGI Symbol;Acc:MGI:3801887]	37	113	5.13448	11.5603	1.17089
ENSMUST00000083715	ENSMUST00000083715	MGI:3646921	Snora74a	small nucleolar RNA, H/ACA box 74A [Source:MGI Symbol;Acc:MGI:3646921]	60	183	8.32618	18.7215	1.16897
ENSMUST00000006628	ENSMUST00000006628	MGI:5439461	Gm21992	predicted gene 21992 [Source:MGI Symbol;Acc:MGI:5439461]	70	211	9.71388	21.586	1.15198
ENSMUST00000178895	ENSMUST00000178895	MGI:3704208	Gm9821	predicted gene 9821 [Source:MGI Symbol;Acc:MGI:3704208]	84	253	11.6567	25.8828	1.15084
ENSMUST00000181809	ENSMUST00000181809		AC092202.1		35	104	4.85694	10.6396	1.13132
ENSMUST00000150375	ENSMUST00000150375	MGI:3652052	Gm13563	predicted gene 13563 [Source:MGI Symbol;Acc:MGI:3652052]	39	115	5.41202	11.7649	1.12025
ENSMUST00000082965	ENSMUST00000082965	MGI:3819519	Snord118	small nucleolar RNA, C/D box 118 [Source:MGI Symbol;Acc:MGI:3819519]	41	120	5.68956	12.2764	1.1095
ENSMUST00000179760	ENSMUST00000179760	MGI:5434051	Gm21887	predicted gene, 21887 [Source:MGI Symbol;Acc:MGI:5434051]	46	134	6.38341	13.7087	1.10269
ENSMUST00000083419	ENSMUST00000083419	MGI:4360049	Snora73b	small nucleolar RNA, H/ACA box 73b [Source:MGI Symbol;Acc:MGI:4360049]	488	1417	67.7196	144.964	1.09805
ENSMUST00000093873	ENSMUST00000093873	MGI:1926184	4930581F22Rik	RIKEN cDNA 4930581F22 gene [Source:MGI Symbol;Acc:MGI:1926184]	35	101	4.85694	10.3326	1.08909
ENSMUST00000062783	ENSMUST00000062783	MGI:2158419	AY036118	cDNA sequence AY036118 [Source:MGI Symbol;Acc:MGI:2158419]	72829	209508	10106.5	21433.4	1.08458
ENSMUST00000150678	ENSMUST00000150678	MGI:3642202	Gm9888	predicted gene 9888 [Source:MGI Symbol;Acc:MGI:3642202]	37	105	5.13448	10.7419	1.06495
ENSMUST00000097827	ENSMUST00000097827	MGI:3650322	Gm16287	predicted gene 16287 [Source:MGI Symbol;Acc:MGI:3650322]	39	110	5.41202	11.2534	1.05612
ENSMUST00000157463	ENSMUST00000157463	MGI:97937	Rmrp	RNA component of mitochondrial RNAase P [Source:MGI Symbol;Acc:MGI:97937]	14692	41257	2038.8	4220.73	1.04977
ENSMUST00000086909	ENSMUST00000086909	MGI:3711274	Gm10430	predicted gene 10430 [Source:MGI Symbol;Acc:MGI:3711274]	50	140	6.93849	14.3225	1.04559
ENSMUST00000182761	ENSMUST00000182761		RP23		58	161	8.04864	16.4709	1.0331
ENSMUST00000155660	ENSMUST00000155660	MGI:3644574	Gm6483	predicted gene 6483 [Source:MGI Symbol;Acc:MGI:3644574]	55	151	7.63233	15.4478	1.01721
ENSMUST00000069711	ENSMUST00000069711	MGI:3651144	Gm14137	predicted gene 14137 [Source:MGI Symbol;Acc:MGI:3651144]	37	101	5.13448	10.3326	1.00892
ENSMUST00000181207	ENSMUST00000181207		AC118227.1		51	139	7.07726	14.2202	1.00668
ENSMUST00000177547	ENSMUST00000177547	MGI:5012221	Gm20036	predicted gene, 20036 [Source:MGI Symbol;Acc:MGI:5012221]	51	136	7.07726	13.9133	0.975199
ENSMUST00000172202	ENSMUST00000172202	MGI:4936934	Gm17300	predicted gene, 17300 [Source:MGI Symbol;Acc:MGI:4936934]	843	2245	116.983	229.671	0.973273
ENSMUST00000105038	ENSMUST00000105038	MGI:3781727	Gm3550	predicted gene 3550 [Source:MGI Symbol;Acc:MGI:3781727]	49	130	6.79972	13.2994	0.96782
ENSMUST00000141390	ENSMUST00000141390	MGI:3782946	Gm15499	predicted gene 15499 [Source:MGI Symbol;Acc:MGI:3782946]	72	191	9.99142	19.54	0.967665
ENSMUST00000181486	ENSMUST00000181486		AL731663.1		119	312	16.5136	31.9187	0.950746
ENSMUST00000145438	ENSMUST00000145438	MGI:1924222	2810008D09Rik	RIKEN cDNA 2810008D09 gene [Source:MGI Symbol;Acc:MGI:1924222]	98	256	13.5994	26.1897	0.945452
ENSMUST00000175368	ENSMUST00000175368	MGI:5455309	Gm25532	predicted gene, 25532 [Source:MGI Symbol;Acc:MGI:5455309]	43	112	5.9671	11.458	0.941252
ENSMUST00000104964	ENSMUST00000104964	MGI:3642127	Gm16503	predicted gene 16503 [Source:MGI Symbol;Acc:MGI:3642127]	44	114	6.10587	11.6626	0.93362
ENSMUST00000180512	ENSMUST00000180512		AC114820.1		102	264	14.1545	27.0081	0.93213
ENSMUST00000082453	ENSMUST00000082453	MGI:4360046	Snora73a	small nucleolar RNA, H/ACA box 73a [Source:MGI Symbol;Acc:MGI:4360046]	356	906	49.402	92.6869	0.907795
ENSMUST00000082671	ENSMUST00000082671	MGI:5451997	Gm22220	predicted gene, 22220 [Source:MGI Symbol;Acc:MGI:5451997]	398	999	55.2303	102.201	0.887878
ENSMUST00000173672	ENSMUST00000173672	MGI:1914211	Neat1	nuclear paraspeckle assembly transcript 1 (non-protein coding) [Source:MGI Symbol;Acc:MGI:1914211]	585	1464	81.1803	149.772	0.883569
ENSMUST00000175318	ENSMUST00000175318	MGI:5454586	Gm24809	predicted gene, 24809 [Source:MGI Symbol;Acc:MGI:5454586]	48	120	6.66095	12.2764	0.88209
ENSMUST00000129164	ENSMUST00000129164	MGI:1925945	C030005K06Rik	RIKEN cDNA C030005K06 gene [Source:MGI Symbol;Acc:MGI:1925945]	44	110	6.10587	11.2534	0.88209
ENSMUST00000181206	ENSMUST00000181206		AC087541.1		140	347	19.4278	35.4993	0.86967
ENSMUST00000181113	ENSMUST00000181113		AC163355.1		77	188	10.6853	19.233	0.847964
ENSMUST00000130063	ENSMUST00000130063	MGI:1926128	Ftx	Ftx transcript, Xist regulator (non-protein coding) [Source:MGI Symbol;Acc:MGI:1926128]	41	100	5.68956	10.2303	0.846466
ENSMUST00000137180	ENSMUST00000137180	MGI:3040676	BC039771	cDNA sequence BC039771 [Source:MGI Symbol;Acc:MGI:3040676]	49	118	6.79972	12.0718	0.828095
ENSMUST00000180691	ENSMUST00000180691		AC118017.1		43	103	5.9671	10.5373	0.820397
ENSMUST00000133001	ENSMUST00000133001	MGI:3644574	Gm6483	predicted gene 6483 [Source:MGI Symbol;Acc:MGI:3644574]	42	100	5.82833	10.2303	0.8117
ENSMUST00000177555	ENSMUST00000177555	MGI:97949	Rn5s	5S RNA [Source:MGI Symbol;Acc:MGI:97949]	901	2145	125.032	219.441	0.81154
ENSMUST00000175441	ENSMUST00000175441	MGI:5455465	Gm25688	predicted gene, 25688 [Source:MGI Symbol;Acc:MGI:5455465]	79	185	10.9628	18.9261	0.787762
ENSMUST00000181052	ENSMUST00000181052		AC183097.1		72	168	9.99142	17.187	0.782554
ENSMUST00000083331	ENSMUST00000083331	MGI:5453232	Gm23455	predicted gene, 23455 [Source:MGI Symbol;Acc:MGI:5453232]	104	242	14.4321	24.7574	0.778585
ENSMUST00000082862	ENSMUST00000082862	MGI:109558	Terc	telomerase RNA component [Source:MGI Symbol;Acc:MGI:109558]	292	679	40.5208	69.464	0.777605
ENSMUST00000088578	ENSMUST00000088578	MGI:1914767	2900097C17Rik	RIKEN cDNA 2900097C17 gene [Source:MGI Symbol;Acc:MGI:1914767]	44	102	6.10587	10.4349	0.773155
ENSMUST00000133693	ENSMUST00000133693	MGI:1917070	1810059H22Rik	RIKEN cDNA 1810059H22 gene [Source:MGI Symbol;Acc:MGI:1917070]	78	180	10.824	18.4146	0.766612
ENSMUST00000149452	ENSMUST00000149452	MGI:3826576	Gm16279	predicted gene 16279 [Source:MGI Symbol;Acc:MGI:3826576]	49	113	6.79972	11.5603	0.765631
ENSMUST00000083320	ENSMUST00000083320	MGI:5453750	Gm23973	predicted gene, 23973 [Source:MGI Symbol;Acc:MGI:5453750]	49	113	6.79972	11.5603	0.765631
ENSMUST00000092883	ENSMUST00000092883	MGI:3641921	Gm10277	predicted gene 10277 [Source:MGI Symbol;Acc:MGI:3641921]	44	101	6.10587	10.3326	0.758941
ENSMUST00000081739	ENSMUST00000081739	MGI:3704492	Gm10143	predicted gene 10143 [Source:MGI Symbol;Acc:MGI:3704492]	58	133	8.04864	13.6064	0.757463
ENSMUST00000175096	ENSMUST00000175096	MGI:1934664	Rpph1	ribonuclease P RNA component H1 [Source:MGI Symbol;Acc:MGI:1934664]	13219	30279	1834.4	3097.65	0.755866
ENSMUST00000181146	ENSMUST00000181146		AL592169.1		101	230	14.0157	23.5298	0.74744
ENSMUST00000128520	ENSMUST00000128520	MGI:3802131	Gm16121	predicted gene 16121 [Source:MGI Symbol;Acc:MGI:3802131]	55	125	7.63233	12.7879	0.744586
ENSMUST00000139014	ENSMUST00000139014	MGI:1924085	2900052L18Rik	RIKEN cDNA 2900052L18 gene [Source:MGI Symbol;Acc:MGI:1924085]	85	192	11.7954	19.6423	0.735733
ENSMUST00000083007	ENSMUST00000083007	MGI:5453015	Gm23238	predicted gene, 23238 [Source:MGI Symbol;Acc:MGI:5453015]	184	413	25.5336	42.2513	0.726598
ENSMUST00000162198	ENSMUST00000162198	MGI:3708796	Gm10612	predicted gene 10612 [Source:MGI Symbol;Acc:MGI:3708796]	91	204	12.628	20.8699	0.724792
ENSMUST00000181644	ENSMUST00000181644		AC139063.1		62	138	8.60372	14.1179	0.71449
ENSMUST00000153748	ENSMUST00000153748	MGI:3694236	6820431F20Rik	RIKEN cDNA 6820431F20 gene [Source:MGI Symbol;Acc:MGI:3694236]	156	347	21.6481	35.4993	0.713551
ENSMUST00000153817	ENSMUST00000153817	MGI:3650499	Gm12976	predicted gene 12976 [Source:MGI Symbol;Acc:MGI:3650499]	55	121	7.63233	12.3787	0.697665
ENSMUST00000140111	ENSMUST00000140111	MGI:1914283	2610005L07Rik	RIKEN cDNA 2610005L07 gene [Source:MGI Symbol;Acc:MGI:1914283]	187	411	25.9499	42.0467	0.696262
ENSMUST00000178451	ENSMUST00000178451	MGI:5434447	Gm21092	predicted gene, 21092 [Source:MGI Symbol;Acc:MGI:5434447]	184	403	25.5336	41.2283	0.691236
ENSMUST00000157400	ENSMUST00000157400	MGI:105103	Rprl3	ribonuclease P RNA-like 3 [Source:MGI Symbol;Acc:MGI:105103]	7933	17347	1100.86	1774.66	0.688909
ENSMUST00000181712	ENSMUST00000181712		AC164105.1		46	100	6.38341	10.2303	0.680456
ENSMUST00000181098	ENSMUST00000181098		AC133510.1		52	113	7.21603	11.5603	0.679901
ENSMUST00000181501	ENSMUST00000181501		AC148981.1		80	173	11.1016	17.6985	0.672862
ENSMUST00000159117	ENSMUST00000159117	MGI:4415006	Gm16586	predicted gene 16586 [Source:MGI Symbol;Acc:MGI:4415006]	73	157	10.1302	16.0616	0.664958
ENSMUST00000181580	ENSMUST00000181580		AL772401.1		82	173	11.3791	17.6985	0.637238
ENSMUST00000180666	ENSMUST00000180666		AL928605.1		194	408	26.9213	41.7398	0.632674
ENSMUST00000180864	ENSMUST00000180864		BX537302.1		68	143	9.43634	14.6294	0.63257
ENSMUST00000168646	ENSMUST00000168646	MGI:2441921	C730034F03Rik	RIKEN cDNA C730034F03 gene [Source:MGI Symbol;Acc:MGI:2441921]	86	180	11.9342	18.4146	0.62575
ENSMUST00000101833	ENSMUST00000101833	MGI:5454042	Gm24265	predicted gene, 24265 [Source:MGI Symbol;Acc:MGI:5454042]	1406	2941	195.11	300.874	0.624872
ENSMUST00000025463	ENSMUST00000025463	MGI:3833940	Gm16286	predicted gene 16286 [Source:MGI Symbol;Acc:MGI:3833940]	78	163	10.824	16.6755	0.623488
ENSMUST00000173847	ENSMUST00000173847	MGI:5141913	Gm20448	predicted gene 20448 [Source:MGI Symbol;Acc:MGI:5141913]	57	119	7.90987	12.1741	0.622089
ENSMUST00000180958	ENSMUST00000180958		AC092094.1		85	177	11.7954	18.1077	0.618376
ENSMUST00000181170	ENSMUST00000181170	MGI:3702496	B930036N10Rik	RIKEN cDNA B930036N10 gene [Source:MGI Symbol;Acc:MGI:3702496]	49	102	6.79972	10.4349	0.617877
ENSMUST00000181775	ENSMUST00000181775		AC116739.1		68	141	9.43634	14.4248	0.61225
ENSMUST00000181045	ENSMUST00000181045		AC147987.1		142	293	19.7053	29.9749	0.605171
ENSMUST00000180852	ENSMUST00000180852		AC133578.1		74	152	10.269	15.5501	0.598636
ENSMUST00000153581	ENSMUST00000153581	MGI:1913852	1700020I14Rik	RIKEN cDNA 1700020I14 gene [Source:MGI Symbol;Acc:MGI:1913852]	131	269	18.1788	27.5196	0.598201
ENSMUST00000083103	ENSMUST00000083103	MGI:103186	Rn7sk	RNA, 7SK, nuclear [Source:MGI Symbol;Acc:MGI:103186]	23145	47517	3211.83	4861.15	0.597905
ENSMUST00000131801	ENSMUST00000131801	MGI:3649403	Gm14252	predicted gene 14252 [Source:MGI Symbol;Acc:MGI:3649403]	69	141	9.57511	14.4248	0.591189
ENSMUST00000181248	ENSMUST00000181248		AC152164.1		71	145	9.85265	14.834	0.590324
ENSMUST00000175460	ENSMUST00000175460	MGI:5452186	Gm22409	predicted gene, 22409 [Source:MGI Symbol;Acc:MGI:5452186]	99	202	13.7382	20.6653	0.589016
ENSMUST00000175425	ENSMUST00000175425	MGI:5451959	Gm22182	predicted gene, 22182 [Source:MGI Symbol;Acc:MGI:5451959]	124	253	17.2074	25.8828	0.588959
ENSMUST00000157560	ENSMUST00000157560	MGI:3819484	Scarna2	small Cajal body-specific RNA 2 [Source:MGI Symbol;Acc:MGI:3819484]	355	724	49.2633	74.0677	0.588332
ENSMUST00000090043	ENSMUST00000090043	MGI:3708663	Gm9864	predicted gene 9864 [Source:MGI Symbol;Acc:MGI:3708663]	306	623	42.4635	63.735	0.585862
ENSMUST00000181739	ENSMUST00000181739		AC158921.1		51	103	7.07726	10.5373	0.574237
ENSMUST00000082864	ENSMUST00000082864	MGI:4422058	n-R5s193	nuclear encoded rRNA 5S 193 [Source:MGI Symbol;Acc:MGI:4422058]	113	228	15.681	23.3252	0.572873
ENSMUST00000181842	ENSMUST00000181842		AC144818.1		61	123	8.46495	12.5833	0.571939
ENSMUST00000092138	ENSMUST00000092138	MGI:5433933	Gm21769	predicted gene, 21769 [Source:MGI Symbol;Acc:MGI:5433933]	365	735	50.6509	75.193	0.570009
ENSMUST00000181482	ENSMUST00000181482		AC027184.1		223	446	30.9456	45.6273	0.560162
ENSMUST00000076791	ENSMUST00000076791	MGI:1924293	4632433K11Rik	RIKEN cDNA 4632433K11 gene [Source:MGI Symbol;Acc:MGI:1924293]	86	172	11.9342	17.5962	0.560162
ENSMUST00000181885	ENSMUST00000181885		AC119189.1		80	160	11.1016	16.3685	0.560162
ENSMUST00000147198	ENSMUST00000147198	MGI:1915436	4632427E13Rik	RIKEN cDNA 4632427E13 gene [Source:MGI Symbol;Acc:MGI:1915436]	50	100	6.93849	10.2303	0.560162
ENSMUST00000158050	ENSMUST00000158050	MGI:105105	Rprl1	ribonuclease P RNA-like 1 [Source:MGI Symbol;Acc:MGI:105105]	159	317	22.0644	32.4302	0.555618
ENSMUST00000178920	ENSMUST00000178920	MGI:5433945	Gm21781	predicted gene, 21781 [Source:MGI Symbol;Acc:MGI:5433945]	78	155	10.824	15.857	0.550884
ENSMUST00000175526	ENSMUST00000175526	MGI:5453195	Gm23418	predicted gene, 23418 [Source:MGI Symbol;Acc:MGI:5453195]	71	141	9.85265	14.4248	0.549966
ENSMUST00000172812	ENSMUST00000172812	MGI:1919539	Malat1	metastasis associated lung adenocarcinoma transcript 1 (non-coding RNA) [Source:MGI Symbol;Acc:MGI:1919539]	4303	8544	597.126	874.08	0.54973
ENSMUST00000151240	ENSMUST00000151240	MGI:3709324	Gm14391	predicted gene 14391 [Source:MGI Symbol;Acc:MGI:3709324]	436	860	60.5036	87.9809	0.54017
ENSMUST00000177864	ENSMUST00000177864	MGI:5454184	Gm24407	predicted gene, 24407 [Source:MGI Symbol;Acc:MGI:5454184]	1367	2670	189.698	273.15	0.525988
ENSMUST00000176366	ENSMUST00000176366	MGI:2444994	A430110C17Rik	RIKEN cDNA A430110C17 gene [Source:MGI Symbol;Acc:MGI:2444994]	83	162	11.5179	16.5732	0.524972
ENSMUST00000064097	ENSMUST00000064097	MGI:2443206	8030423F21Rik	RIKEN cDNA 8030423F21 gene [Source:MGI Symbol;Acc:MGI:2443206]	83	160	11.5179	16.3685	0.50705
ENSMUST00000171747	ENSMUST00000171747	MGI:3708526	Gm9929	predicted gene 9929 [Source:MGI Symbol;Acc:MGI:3708526]	150	288	20.8155	29.4634	0.501268
