# Supplementary material for: Identification of Non-Coding RNAs Associated with Telomeres Using a Combination of enChIP and RNA Sequencing
Source: PLoS One. 2015 Apr 13;10(4):e0123387. doi: 10.1371/journal.pone.0123387 (PMC4395285; doi:10.1371/journal.pone.0123387)
Supplement: S2 Table — (XLSX) [file pone.0123387.s002.xlsx]

## Sheet: result
Table S2. RNAs detected by enChIP-RNA-Seq analysis
Ensembl ID	Link to Ensembl	MGI Accession (Link to MGI)	Gene symbol	Gene description	3xFNLDD read count	3xFN-Tel-TAL read count	3xFNLDD RPM	3xFN-Tel-TAL RPM	3xFN-Tel-TAL RPM / 3xFNLDD RPM)
ENSMUST00000182010	ENSMUST00000182010		RP23-81C12.3		1783431	1965441	247486	201071	-0.299641
ENSMUST00000175336	ENSMUST00000175336	MGI:4950425	Mir5105	microRNA 5105 [Source:MGI Symbol;Acc:MGI:4950425]	1393976	1538914	193442	157436	-0.297132
ENSMUST00000183314	ENSMUST00000183314		RP23-81C12.1		377835	1218185	52432.1	124624	1.24907
ENSMUST00000102303	ENSMUST00000102303	MGI:5453712	Gm23935	predicted gene, 23935 [Source:MGI Symbol;Acc:MGI:5453712]	730964	788167	101436	80632.2	-0.331137
ENSMUST00000160554	ENSMUST00000160554	MGI:3783104	Gm15662	predicted gene 15662 [Source:MGI Symbol;Acc:MGI:3783104]	659108	676086	91464.2	69165.9	-0.403146
ENSMUST00000038863	ENSMUST00000038863	MGI:2142973	Lars2	leucyl-tRNA synthetase, mitochondrial [Source:MGI Symbol;Acc:MGI:2142973]	342107	439568	47474.1	44969.3	-0.0781996
ENSMUST00000175357	ENSMUST00000175357	MGI:5452418	Gm22641	predicted gene, 22641 [Source:MGI Symbol;Acc:MGI:5452418]	334505	395676	46419.2	40479	-0.197547
ENSMUST00000182520	ENSMUST00000182520		RP23-81C12.1		109071	347206	15135.8	35520.4	1.23069
ENSMUST00000175168	ENSMUST00000175168	MGI:5455509	Gm25732	predicted gene, 25732 [Source:MGI Symbol;Acc:MGI:5455509]	224829	259467	31199.5	26544.4	-0.233115
ENSMUST00000062783	ENSMUST00000062783	MGI:2158419	AY036118	cDNA sequence AY036118 [Source:MGI Symbol;Acc:MGI:2158419]	72829	209508	10106.5	21433.4	1.08458
ENSMUST00000175596	ENSMUST00000175596	MGI:4950429	Mir5109	microRNA 5109 [Source:MGI Symbol;Acc:MGI:4950429]	83921	89988	11645.7	9206.08	-0.339138
ENSMUST00000119528	ENSMUST00000119528	MGI:3652307	Gm12054	predicted gene 12054 [Source:MGI Symbol;Acc:MGI:3652307]	69471	88284	9640.47	9031.76	-0.0940973
ENSMUST00000093738	ENSMUST00000093738	MGI:97987	Rnu3b3	U3B small nuclear RNA 3 [Source:MGI Symbol;Acc:MGI:97987]	12369	71578	1716.44	7322.67	2.09295
ENSMUST00000083103	ENSMUST00000083103	MGI:103186	Rn7sk	RNA, 7SK, nuclear [Source:MGI Symbol;Acc:MGI:103186]	23145	47517	3211.83	4861.15	0.597905
ENSMUST00000174924	ENSMUST00000174924	MGI:5452182	Gm22405	predicted gene, 22405 [Source:MGI Symbol;Acc:MGI:5452182]	20040	47243	2780.95	4833.12	0.79738
ENSMUST00000157463	ENSMUST00000157463	MGI:97937	Rmrp	RNA component of mitochondrial RNAase P [Source:MGI Symbol;Acc:MGI:97937]	14692	41257	2038.8	4220.73	1.04977
ENSMUST00000175096	ENSMUST00000175096	MGI:1934664	Rpph1	ribonuclease P RNA component H1 [Source:MGI Symbol;Acc:MGI:1934664]	13219	30279	1834.4	3097.65	0.755866
ENSMUST00000082761	ENSMUST00000082761	MGI:5451845	Gm22068	predicted gene, 22068 [Source:MGI Symbol;Acc:MGI:5451845]	9061	22997	1257.39	2352.67	0.903865
ENSMUST00000118430	ENSMUST00000118430	MGI:3650312	Gm12896	predicted gene 12896 [Source:MGI Symbol;Acc:MGI:3650312]	21987	17970	3051.13	1838.39	-0.730899
ENSMUST00000157400	ENSMUST00000157400	MGI:105103	Rprl3	ribonuclease P RNA-like 3 [Source:MGI Symbol;Acc:MGI:105103]	7933	17347	1100.86	1774.66	0.688909
ENSMUST00000180798	ENSMUST00000180798		AC163097.1		11948	10827	1658.02	1107.64	-0.581974
ENSMUST00000082390	ENSMUST00000082390	MGI:102492	mt-Rnr2	mitochondrially encoded 16S rRNA [Source:MGI Symbol;Acc:MGI:102492]	10965	9721	1521.61	994.492	-0.613568
ENSMUST00000172812	ENSMUST00000172812	MGI:1919539	Malat1	metastasis associated lung adenocarcinoma transcript 1 (non-coding RNA) [Source:MGI Symbol;Acc:MGI:1919539]	4303	8544	597.126	874.08	0.54973
ENSMUST00000082768	ENSMUST00000082768	MGI:5454727	Gm24950	predicted gene, 24950 [Source:MGI Symbol;Acc:MGI:5454727]	4822	6930	669.148	708.963	0.0833853
ENSMUST00000164420	ENSMUST00000164420	MGI:4937958	Gm17131	predicted gene 17131 [Source:MGI Symbol;Acc:MGI:4937958]	5701	6666	791.126	681.955	-0.214232
ENSMUST00000083936	ENSMUST00000083936	MGI:97977	Rnu3a	U3A small nuclear RNA [Source:MGI Symbol;Acc:MGI:97977]	1142	6400	158.475	654.742	2.04667
ENSMUST00000082388	ENSMUST00000082388	MGI:102493	mt-Rnr1	mitochondrially encoded 12S rRNA [Source:MGI Symbol;Acc:MGI:102493]	5292	6229	734.369	637.248	-0.204651
ENSMUST00000044500	ENSMUST00000044500	MGI:3782293	Gm4117	predicted gene 4117 [Source:MGI Symbol;Acc:MGI:3782293]	4569	5275	634.039	539.651	-0.232546
ENSMUST00000157984	ENSMUST00000157984	MGI:5453964	Gm24187	predicted gene, 24187 [Source:MGI Symbol;Acc:MGI:5453964]	4218	4762	585.331	487.169	-0.26483
ENSMUST00000157621	ENSMUST00000157621	MGI:5455688	Gm25911	predicted gene, 25911 [Source:MGI Symbol;Acc:MGI:5455688]	4122	3558	572.009	363.996	-0.652116
ENSMUST00000082922	ENSMUST00000082922	MGI:5453221	Gm23444	predicted gene, 23444 [Source:MGI Symbol;Acc:MGI:5453221]	2221	2987	308.208	305.58	-0.0123505
ENSMUST00000101833	ENSMUST00000101833	MGI:5454042	Gm24265	predicted gene, 24265 [Source:MGI Symbol;Acc:MGI:5454042]	1406	2941	195.11	300.874	0.624872
ENSMUST00000082989	ENSMUST00000082989	MGI:5451819	Gm22042	predicted gene, 22042 [Source:MGI Symbol;Acc:MGI:5451819]	2183	2677	302.934	273.866	-0.145533
ENSMUST00000177864	ENSMUST00000177864	MGI:5454184	Gm24407	predicted gene, 24407 [Source:MGI Symbol;Acc:MGI:5454184]	1367	2670	189.698	273.15	0.525988
ENSMUST00000161624	ENSMUST00000161624	MGI:2183747	Fgd4	FYVE, RhoGEF and PH domain containing 4 [Source:MGI Symbol;Acc:MGI:2183747]	1985	2522	275.458	258.009	-0.0944091
ENSMUST00000083360	ENSMUST00000083360	MGI:5456009	Gm26232	predicted gene, 26232 [Source:MGI Symbol;Acc:MGI:5456009]	1531	2444	212.456	250.03	0.234932
ENSMUST00000068792	ENSMUST00000068792	MGI:2445107	Tmem245	transmembrane protein 245 [Source:MGI Symbol;Acc:MGI:2445107]	1285	2266	178.319	231.82	0.378541
ENSMUST00000172202	ENSMUST00000172202	MGI:4936934	Gm17300	predicted gene, 17300 [Source:MGI Symbol;Acc:MGI:4936934]	843	2245	116.983	229.671	0.973273
ENSMUST00000124925	ENSMUST00000124925	MGI:3605542	Hexdc	hexosaminidase (glycosyl hydrolase family 20, catalytic domain) containing [Source:MGI Symbol;Acc:MGI:3605542]	1311	2245	181.927	229.671	0.336209
ENSMUST00000071399	ENSMUST00000071399	MGI:1347249	Psg16	pregnancy specific glycoprotein 16 [Source:MGI Symbol;Acc:MGI:1347249]	1160	2163	160.973	221.282	0.45907
ENSMUST00000144826	ENSMUST00000144826	MGI:109382	Ccrn4l	CCR4 carbon catabolite repression 4-like (S. cerevisiae) [Source:MGI Symbol;Acc:MGI:109382]	1725	2153	239.378	220.259	-0.120086
ENSMUST00000177555	ENSMUST00000177555	MGI:97949	Rn5s	5S RNA [Source:MGI Symbol;Acc:MGI:97949]	901	2145	125.032	219.441	0.81154
ENSMUST00000086876	ENSMUST00000086876	MGI:1920086	Pot1b	protection of telomeres 1B [Source:MGI Symbol;Acc:MGI:1920086]	1600	2140	222.032	218.929	-0.0202995
ENSMUST00000109542	ENSMUST00000109542	MGI:4937959	Gm17132	predicted gene 17132 [Source:MGI Symbol;Acc:MGI:4937959]	3120	2127	432.962	217.599	-0.992564
ENSMUST00000181242	ENSMUST00000181242		AC131780.1		3426	2019	475.425	206.551	-1.20272
ENSMUST00000088621	ENSMUST00000088621	MGI:1923206	Srrm2	serine/arginine repetitive matrix 2 [Source:MGI Symbol;Acc:MGI:1923206]	1347	1961	186.923	200.617	0.102001
ENSMUST00000117964	ENSMUST00000117964	MGI:3651668	Gm13722	predicted gene 13722 [Source:MGI Symbol;Acc:MGI:3651668]	1598	1826	221.754	186.806	-0.247419
ENSMUST00000025253	ENSMUST00000025253	MGI:1915467	Prrc2a	proline-rich coiled-coil 2A [Source:MGI Symbol;Acc:MGI:1915467]	911	1825	126.419	186.704	0.562535
ENSMUST00000038893	ENSMUST00000038893	MGI:1919784	Rcc2	regulator of chromosome condensation 2 [Source:MGI Symbol;Acc:MGI:1919784]	317	1764	43.99	180.463	2.03646
ENSMUST00000023741	ENSMUST00000023741	MGI:2682319	Mll2	myeloid/lymphoid or mixed-lineage leukemia 2 [Source:MGI Symbol;Acc:MGI:2682319]	910	1681	126.28	171.972	0.445543
ENSMUST00000026221	ENSMUST00000026221	MGI:98240	Scd2	stearoyl-Coenzyme A desaturase 2 [Source:MGI Symbol;Acc:MGI:98240]	545	1606	75.6295	164.299	1.11931
ENSMUST00000083988	ENSMUST00000083988	MGI:4421735	n-R5-8s1	nuclear encoded rRNA 5.8S 1 [Source:MGI Symbol;Acc:MGI:4421735]	986	1603	136.827	163.992	0.261276
ENSMUST00000174043	ENSMUST00000174043	MGI:2386848	Cyb5r4	cytochrome b5 reductase 4 [Source:MGI Symbol;Acc:MGI:2386848]	1013	1592	140.574	162.867	0.212368
ENSMUST00000172717	ENSMUST00000172717	MGI:5141934	Gm20469	predicted gene 20469 [Source:MGI Symbol;Acc:MGI:5141934]	1500	1591	208.155	162.765	-0.354867
ENSMUST00000104526	ENSMUST00000104526	MGI:3819523	Snord17	small nucleolar RNA, C/D box 17 [Source:MGI Symbol;Acc:MGI:3819523]	215	1512	29.8355	154.683	2.37421
ENSMUST00000045303	ENSMUST00000045303	MGI:2384936	Spns2	spinster homolog 2 [Source:MGI Symbol;Acc:MGI:2384936]	498	1487	69.1073	152.125	1.13835
ENSMUST00000178312	ENSMUST00000178312	MGI:5434061	Gm21897	predicted gene, 21897 [Source:MGI Symbol;Acc:MGI:5434061]	1656	1478	229.803	151.204	-0.603895
ENSMUST00000105046	ENSMUST00000105046	MGI:96161	Hmga1-rs1	high mobility group AT-hook I, related sequence 1 [Source:MGI Symbol;Acc:MGI:96161]	345	1477	47.8756	151.102	1.65816
ENSMUST00000173672	ENSMUST00000173672	MGI:1914211	Neat1	nuclear paraspeckle assembly transcript 1 (non-protein coding) [Source:MGI Symbol;Acc:MGI:1914211]	585	1464	81.1803	149.772	0.883569
ENSMUST00000125365	ENSMUST00000125365	MGI:2445050	A230004M16Rik	RIKEN cDNA A230004M16 gene [Source:MGI Symbol;Acc:MGI:2445050]	1812	1461	251.451	149.465	-0.750465
ENSMUST00000150171	ENSMUST00000150171	MGI:3650499	Gm12976	predicted gene 12976 [Source:MGI Symbol;Acc:MGI:3650499]	780	1436	108.24	146.908	0.440671
ENSMUST00000101295	ENSMUST00000101295	MGI:3711310	9930111J21Rik2	RIKEN cDNA 9930111J21 gene 2 [Source:MGI Symbol;Acc:MGI:3711310]	1424	1434	197.608	146.703	-0.429743
ENSMUST00000054801	ENSMUST00000054801	MGI:2685837	Mettl21e	methyltransferase like 21E [Source:MGI Symbol;Acc:MGI:2685837]	3207	1433	445.034	146.601	-1.60202
ENSMUST00000074651	ENSMUST00000074651	MGI:95801	Grk4	G protein-coupled receptor kinase 4 [Source:MGI Symbol;Acc:MGI:95801]	1070	1421	148.484	145.373	-0.0305426
ENSMUST00000083419	ENSMUST00000083419	MGI:4360049	Snora73b	small nucleolar RNA, H/ACA box 73b [Source:MGI Symbol;Acc:MGI:4360049]	488	1417	67.7196	144.964	1.09805
ENSMUST00000122214	ENSMUST00000122214	MGI:3649907	Gm12895	predicted gene 12895 [Source:MGI Symbol;Acc:MGI:3649907]	2160	1348	299.743	137.905	-1.12005
ENSMUST00000166737	ENSMUST00000166737	MGI:2686052	Zfp488	zinc finger protein 488 [Source:MGI Symbol;Acc:MGI:2686052]	1059	1335	146.957	136.575	-0.105701
ENSMUST00000177203	ENSMUST00000177203	MGI:2445031	Sik2	salt inducible kinase 2 [Source:MGI Symbol;Acc:MGI:2445031]	943	1305	130.86	133.506	0.0288817
ENSMUST00000046587	ENSMUST00000046587	MGI:1928948	Scamp5	secretory carrier membrane protein 5 [Source:MGI Symbol;Acc:MGI:1928948]	359	1287	49.8183	131.665	1.40212
ENSMUST00000026292	ENSMUST00000026292	MGI:1926884	Huwe1	HECT, UBA and WWE domain containing 1 [Source:MGI Symbol;Acc:MGI:1926884]	839	1282	116.428	131.153	0.171815
ENSMUST00000053271	ENSMUST00000053271	MGI:1924015	Mlec	malectin [Source:MGI Symbol;Acc:MGI:1924015]	368	1278	51.0673	130.744	1.35627
ENSMUST00000160031	ENSMUST00000160031	MGI:3826587	Gm16300	predicted gene 16300 [Source:MGI Symbol;Acc:MGI:3826587]	1113	1264	154.451	129.312	-0.256296
ENSMUST00000181572	ENSMUST00000181572		AC131780.1		2168	1262	300.853	129.107	-1.22049
ENSMUST00000153125	ENSMUST00000153125	MGI:1916028	Gucd1	guanylyl cyclase domain containing 1 [Source:MGI Symbol;Acc:MGI:1916028]	853	1250	118.371	127.879	0.111472
ENSMUST00000140021	ENSMUST00000140021	MGI:3705304	Gm14565	predicted gene 14565 [Source:MGI Symbol;Acc:MGI:3705304]	981	1239	136.133	126.754	-0.102987
ENSMUST00000082446	ENSMUST00000082446	MGI:5456225	Gm26448	predicted gene, 26448 [Source:MGI Symbol;Acc:MGI:5456225]	271	1192	37.6066	121.946	1.69718
ENSMUST00000147575	ENSMUST00000147575	MGI:3045348	Cpa6	carboxypeptidase A6 [Source:MGI Symbol;Acc:MGI:3045348]	774	1174	107.408	120.104	0.161189
ENSMUST00000014642	ENSMUST00000014642	MGI:2444029	Ankrd52	ankyrin repeat domain 52 [Source:MGI Symbol;Acc:MGI:2444029]	260	1154	36.0801	118.058	1.71022
ENSMUST00000143781	ENSMUST00000143781	MGI:3649867	Gm11669	predicted gene 11669 [Source:MGI Symbol;Acc:MGI:3649867]	798	1149	110.738	117.547	0.0860798
ENSMUST00000133648	ENSMUST00000133648	MGI:3652169	Gm13977	predicted gene 13977 [Source:MGI Symbol;Acc:MGI:3652169]	676	1134	93.8083	116.012	0.306487
ENSMUST00000067936	ENSMUST00000067936	MGI:2178103	Arhgdia	Rho GDP dissociation inhibitor (GDI) alpha [Source:MGI Symbol;Acc:MGI:2178103]	223	1132	30.9456	115.807	1.90392
ENSMUST00000026846	ENSMUST00000026846	MGI:98878	Tyms	thymidylate synthase [Source:MGI Symbol;Acc:MGI:98878]	905	1094	125.587	111.92	-0.166215
ENSMUST00000038211	ENSMUST00000038211	MGI:2445121	Slfn9	schlafen 9 [Source:MGI Symbol;Acc:MGI:2445121]	825	1083	114.485	110.795	-0.0472712
ENSMUST00000096355	ENSMUST00000096355	MGI:1339759	Csf2rb	colony stimulating factor 2 receptor, beta, low-affinity (granulocyte-macrophage) [Source:MGI Symbol;Acc:MGI:1339759]	583	1052	80.9027	107.623	0.411729
ENSMUST00000033310	ENSMUST00000033310	MGI:106035	Mki67	antigen identified by monoclonal antibody Ki 67 [Source:MGI Symbol;Acc:MGI:106035]	952	1048	132.109	107.214	-0.301233
ENSMUST00000058470	ENSMUST00000058470	MGI:98086	Polr2a	polymerase (RNA) II (DNA directed) polypeptide A [Source:MGI Symbol;Acc:MGI:98086]	302	1040	41.9085	106.396	1.34412
ENSMUST00000075588	ENSMUST00000075588	MGI:1930270	Tnfrsf22	tumor necrosis factor receptor superfamily, member 22 [Source:MGI Symbol;Acc:MGI:1930270]	746	1040	103.522	106.396	0.0394976
ENSMUST00000132720	ENSMUST00000132720	MGI:109555	Psmc2	proteasome (prosome, macropain) 26S subunit, ATPase 2 [Source:MGI Symbol;Acc:MGI:109555]	668	1033	92.6982	105.679	0.189082
ENSMUST00000086483	ENSMUST00000086483	MGI:2141043	Ccdc60	coiled-coil domain containing 60 [Source:MGI Symbol;Acc:MGI:2141043]	665	1023	92.2819	104.656	0.181542
ENSMUST00000082671	ENSMUST00000082671	MGI:5451997	Gm22220	predicted gene, 22220 [Source:MGI Symbol;Acc:MGI:5451997]	398	999	55.2303	102.201	0.887878
ENSMUST00000180779	ENSMUST00000180779		AC107744.1		570	976	79.0987	99.8481	0.336081
ENSMUST00000099046	ENSMUST00000099046	MGI:3642028	Gm10718	predicted gene 10718 [Source:MGI Symbol;Acc:MGI:3642028]	1847	964	256.308	98.6205	-1.37792
ENSMUST00000163360	ENSMUST00000163360	MGI:1306799	D17H6S56E-5	DNA segment, Chr 17, human D6S56E 5 [Source:MGI Symbol;Acc:MGI:1306799]	392	955	54.3977	97.6998	0.844809
ENSMUST00000121772	ENSMUST00000121772	MGI:3705690	Gm14735	predicted gene 14735 [Source:MGI Symbol;Acc:MGI:3705690]	566	950	78.5437	97.1883	0.307287
ENSMUST00000055655	ENSMUST00000055655	MGI:95485	Fasn	fatty acid synthase [Source:MGI Symbol;Acc:MGI:95485]	575	950	79.7926	97.1883	0.284527
ENSMUST00000008024	ENSMUST00000008024	MGI:1935147	Arid1a	AT rich interactive domain 1A (SWI-like) [Source:MGI Symbol;Acc:MGI:1935147]	356	947	49.402	96.8813	0.971649
ENSMUST00000141235	ENSMUST00000141235	MGI:1914356	Zbtb8os	zinc finger and BTB domain containing 8 opposite strand [Source:MGI Symbol;Acc:MGI:1914356]	590	943	81.8741	96.4721	0.236704
ENSMUST00000181514	ENSMUST00000181514		RP23-61D6.4		571	935	79.2375	95.6537	0.271637
ENSMUST00000071487	ENSMUST00000071487	MGI:1890165	Larp1	La ribonucleoprotein domain family, member 1 [Source:MGI Symbol;Acc:MGI:1890165]	322	912	44.6838	93.3007	1.06213
ENSMUST00000141187	ENSMUST00000141187	MGI:105980	Cntn1	contactin 1 [Source:MGI Symbol;Acc:MGI:105980]	631	909	87.5637	92.9938	0.0868019
ENSMUST00000082453	ENSMUST00000082453	MGI:4360046	Snora73a	small nucleolar RNA, H/ACA box 73a [Source:MGI Symbol;Acc:MGI:4360046]	356	906	49.402	92.6869	0.907795
ENSMUST00000080726	ENSMUST00000080726	MGI:3708676	Gm10040	predicted gene 10040 [Source:MGI Symbol;Acc:MGI:3708676]	704	901	97.6939	92.1754	-0.0838867
ENSMUST00000181610	ENSMUST00000181610		AL627077.2		594	900	82.4292	92.0731	0.159624
ENSMUST00000034279	ENSMUST00000034279	MGI:1098275	Gse1	genetic suppressor element 1 [Source:MGI Symbol;Acc:MGI:1098275]	400	891	55.5079	91.1523	0.715587
ENSMUST00000098874	ENSMUST00000098874	MGI:5433914	Gm21750	predicted gene, 21750 [Source:MGI Symbol;Acc:MGI:5433914]	1083	888	150.288	90.8454	-0.72624
ENSMUST00000011492	ENSMUST00000011492	MGI:1914272	Acad9	acyl-Coenzyme A dehydrogenase family, member 9 [Source:MGI Symbol;Acc:MGI:1914272]	601	877	83.4006	89.7201	0.105373
ENSMUST00000117472	ENSMUST00000117472	MGI:3650682	Gm12913	predicted gene 12913 [Source:MGI Symbol;Acc:MGI:3650682]	1064	874	147.651	89.4132	-0.723631
ENSMUST00000116560	ENSMUST00000116560	MGI:101757	Cfl1	cofilin 1, non-muscle [Source:MGI Symbol;Acc:MGI:101757]	185	873	25.6724	89.3109	1.79862
ENSMUST00000064190	ENSMUST00000064190	MGI:103291	Rai1	retinoic acid induced 1 [Source:MGI Symbol;Acc:MGI:103291]	482	873	66.887	89.3109	0.41711
ENSMUST00000084674	ENSMUST00000084674	MGI:3041208	4732465J04Rik	RIKEN cDNA 4732465J04 gene [Source:MGI Symbol;Acc:MGI:3041208]	559	867	77.5723	88.6971	0.193345
ENSMUST00000074702	ENSMUST00000074702	MGI:3642044	Gm10125	predicted gene 10125 [Source:MGI Symbol;Acc:MGI:3642044]	639	864	88.6739	88.3902	-0.00462301
ENSMUST00000151240	ENSMUST00000151240	MGI:3709324	Gm14391	predicted gene 14391 [Source:MGI Symbol;Acc:MGI:3709324]	436	860	60.5036	87.9809	0.54017
ENSMUST00000036125	ENSMUST00000036125	MGI:1341822	Eif4h	eukaryotic translation initiation factor 4H [Source:MGI Symbol;Acc:MGI:1341822]	148	859	20.5379	87.8786	2.09722
ENSMUST00000044113	ENSMUST00000044113	MGI:2446632	Ago2	argonaute RISC catalytic subunit 2 [Source:MGI Symbol;Acc:MGI:2446632]	266	854	36.9127	87.3671	1.24297
ENSMUST00000100497	ENSMUST00000100497	MGI:87904	Actb	actin, beta [Source:MGI Symbol;Acc:MGI:87904]	400	851	55.5079	87.0602	0.649321
ENSMUST00000143074	ENSMUST00000143074	MGI:2445097	A830010M20Rik	RIKEN cDNA A830010M20 gene [Source:MGI Symbol;Acc:MGI:2445097]	1537	850	213.289	86.9579	-1.29442
ENSMUST00000096356	ENSMUST00000096356	MGI:1339760	Csf2rb2	colony stimulating factor 2 receptor, beta 2, low-affinity (granulocyte-macrophage) [Source:MGI Symbol;Acc:MGI:1339760]	751	849	104.216	86.8556	-0.262887
ENSMUST00000129653	ENSMUST00000129653	MGI:1916617	Glrx2	glutaredoxin 2 (thioltransferase) [Source:MGI Symbol;Acc:MGI:1916617]	545	848	75.6295	86.7533	0.19797
ENSMUST00000058139	ENSMUST00000058139	MGI:3648156	Slc38a6	solute carrier family 38, member 6 [Source:MGI Symbol;Acc:MGI:3648156]	881	845	122.256	86.4464	-0.500029
ENSMUST00000043419	ENSMUST00000043419	MGI:106248	Eif5a	eukaryotic translation initiation factor 5A [Source:MGI Symbol;Acc:MGI:106248]	370	836	51.3448	85.5257	0.736139
ENSMUST00000054052	ENSMUST00000054052	MGI:1095400	Zfpm1	zinc finger protein, multitype 1 [Source:MGI Symbol;Acc:MGI:1095400]	385	834	53.4263	85.3211	0.675351
ENSMUST00000001809	ENSMUST00000001809	MGI:1349722	Pabpc1	poly(A) binding protein, cytoplasmic 1 [Source:MGI Symbol;Acc:MGI:1349722]	369	824	51.206	84.298	0.719185
ENSMUST00000147722	ENSMUST00000147722	MGI:3802078	Gm16211	predicted gene 16211 [Source:MGI Symbol;Acc:MGI:3802078]	517	823	71.7439	84.1957	0.23089
ENSMUST00000150124	ENSMUST00000150124	MGI:2445165	Elmod2	ELMO/CED-12 domain containing 2 [Source:MGI Symbol;Acc:MGI:2445165]	462	820	64.1116	83.8888	0.387893
ENSMUST00000114036	ENSMUST00000114036	MGI:98353	Son	Son DNA binding protein [Source:MGI Symbol;Acc:MGI:98353]	464	820	64.3892	83.8888	0.381661
ENSMUST00000180863	ENSMUST00000180863		AC136215.1		517	805	71.7439	82.3543	0.198986
ENSMUST00000094287	ENSMUST00000094287	MGI:3652571	Ctcfl	CCCTC-binding factor (zinc finger protein)-like [Source:MGI Symbol;Acc:MGI:3652571]	569	804	78.96	82.252	0.0589285
ENSMUST00000110391	ENSMUST00000110391	MGI:103227	Cmah	cytidine monophospho-N-acetylneuraminic acid hydroxylase [Source:MGI Symbol;Acc:MGI:103227]	646	803	89.6452	82.1496	-0.125973
ENSMUST00000166899	ENSMUST00000166899	MGI:5439431	Gm21962	predicted gene, 21962 [Source:MGI Symbol;Acc:MGI:5439431]	974	794	135.162	81.2289	-0.734621
ENSMUST00000149511	ENSMUST00000149511	MGI:106100	Etfdh	electron transferring flavoprotein, dehydrogenase [Source:MGI Symbol;Acc:MGI:106100]	414	792	57.4507	81.0243	0.496031
ENSMUST00000025804	ENSMUST00000025804	MGI:1923558	Rab1b	RAB1B, member RAS oncogene family [Source:MGI Symbol;Acc:MGI:1923558]	142	788	19.7053	80.6151	2.03247
ENSMUST00000035105	ENSMUST00000035105	MGI:105381	Rpsa	ribosomal protein SA [Source:MGI Symbol;Acc:MGI:105381]	457	781	63.4178	79.899	0.33329
ENSMUST00000067136	ENSMUST00000067136	MGI:1920784	1700082M22Rik	RIKEN cDNA 1700082M22 gene [Source:MGI Symbol;Acc:MGI:1920784]	441	774	61.1974	79.1828	0.371717
ENSMUST00000027528	ENSMUST00000027528	MGI:2176380	Mlph	melanophilin [Source:MGI Symbol;Acc:MGI:2176380]	714	772	99.0816	78.9782	-0.327162
ENSMUST00000032916	ENSMUST00000032916	MGI:1338823	Maz	MYC-associated zinc finger protein (purine-binding transcription factor) [Source:MGI Symbol;Acc:MGI:1338823]	309	758	42.8798	77.546	0.854753
ENSMUST00000153941	ENSMUST00000153941	MGI:3648156	Slc38a6	solute carrier family 38, member 6 [Source:MGI Symbol;Acc:MGI:3648156]	528	758	73.2704	77.546	0.0818215
ENSMUST00000007814	ENSMUST00000007814	MGI:1336214	Khsrp	KH-type splicing regulatory protein [Source:MGI Symbol;Acc:MGI:1336214]	233	753	32.3333	77.0345	1.25248
ENSMUST00000156089	ENSMUST00000156089	MGI:102676	Abcc1	ATP-binding cassette, sub-family C (CFTR/MRP), member 1 [Source:MGI Symbol;Acc:MGI:102676]	454	749	63.0015	76.6253	0.282435
ENSMUST00000107022	ENSMUST00000107022	MGI:96234	Hsd3b2	hydroxy-delta-5-steroid dehydrogenase, 3 beta- and steroid delta-isomerase 2 [Source:MGI Symbol;Acc:MGI:96234]	559	747	77.5723	76.4207	-0.0215784
ENSMUST00000181598	ENSMUST00000181598		AC130216.1		568	746	78.8212	76.3184	-0.0465537
ENSMUST00000146404	ENSMUST00000146404	MGI:3649991	Gm13589	predicted gene 13589 [Source:MGI Symbol;Acc:MGI:3649991]	525	745	72.8541	76.2161	0.0650846
ENSMUST00000150014	ENSMUST00000150014	MGI:2444912	Mbnl3	muscleblind-like 3 (Drosophila) [Source:MGI Symbol;Acc:MGI:2444912]	496	743	68.8298	76.0114	0.143184
ENSMUST00000092048	ENSMUST00000092048	MGI:106095	Naca	nascent polypeptide-associated complex alpha polypeptide [Source:MGI Symbol;Acc:MGI:106095]	312	741	43.2962	75.8068	0.808089
ENSMUST00000101463	ENSMUST00000101463	MGI:96820	Lpl	lipoprotein lipase [Source:MGI Symbol;Acc:MGI:96820]	568	740	78.8212	75.7045	-0.058204
ENSMUST00000093906	ENSMUST00000093906	MGI:1203517	Birc5	baculoviral IAP repeat-containing 5 [Source:MGI Symbol;Acc:MGI:1203517]	283	738	39.2718	75.4999	0.94298
ENSMUST00000065638	ENSMUST00000065638	MGI:2137624	Pom121	nuclear pore membrane protein 121 [Source:MGI Symbol;Acc:MGI:2137624]	169	736	23.4521	75.2953	1.68284
ENSMUST00000092138	ENSMUST00000092138	MGI:5433933	Gm21769	predicted gene, 21769 [Source:MGI Symbol;Acc:MGI:5433933]	365	735	50.6509	75.193	0.570009
ENSMUST00000025337	ENSMUST00000025337	MGI:1194490	Diap1	diaphanous homolog 1 (Drosophila) [Source:MGI Symbol;Acc:MGI:1194490]	234	733	32.4721	74.9884	1.20747
ENSMUST00000042235	ENSMUST00000042235	MGI:1096881	Eef1a1	eukaryotic translation elongation factor 1 alpha 1 [Source:MGI Symbol;Acc:MGI:1096881]	639	727	88.6739	74.3746	-0.253699
ENSMUST00000157560	ENSMUST00000157560	MGI:3819484	Scarna2	small Cajal body-specific RNA 2 [Source:MGI Symbol;Acc:MGI:3819484]	355	724	49.2633	74.0677	0.588332
ENSMUST00000024884	ENSMUST00000024884	MGI:1353449	Eif2ak2	eukaryotic translation initiation factor 2-alpha kinase 2 [Source:MGI Symbol;Acc:MGI:1353449]	445	721	61.7525	73.7608	0.256356
ENSMUST00000059193	ENSMUST00000059193	MGI:101802	F2r	coagulation factor II (thrombin) receptor [Source:MGI Symbol;Acc:MGI:101802]	226	717	31.362	73.3516	1.22581
ENSMUST00000016771	ENSMUST00000016771	MGI:107717	Myh9	myosin, heavy polypeptide 9, non-muscle [Source:MGI Symbol;Acc:MGI:107717]	260	717	36.0801	73.3516	1.02362
ENSMUST00000144139	ENSMUST00000144139	MGI:1915518	Zdhhc21	zinc finger, DHHC domain containing 21 [Source:MGI Symbol;Acc:MGI:1915518]	506	716	70.2175	73.2493	0.0609838
ENSMUST00000099087	ENSMUST00000099087	MGI:1928482	Mbnl1	muscleblind-like 1 (Drosophila) [Source:MGI Symbol;Acc:MGI:1928482]	378	711	52.455	72.7377	0.471625
ENSMUST00000121552	ENSMUST00000121552	MGI:3647765	Gm6480	predicted pseudogene 6480 [Source:MGI Symbol;Acc:MGI:3647765]	404	708	56.063	72.4308	0.369556
ENSMUST00000147973	ENSMUST00000147973	MGI:3646534	Gm6211	predicted gene 6211 [Source:MGI Symbol;Acc:MGI:3646534]	414	705	57.4507	72.1239	0.328154
ENSMUST00000066604	ENSMUST00000066604	MGI:3045250	A130066N16Rik	RIKEN cDNA A130066N16 gene [Source:MGI Symbol;Acc:MGI:3045250]	902	701	125.17	71.7147	-0.803551
ENSMUST00000054674	ENSMUST00000054674	MGI:2685821	Hjurp	Holliday junction recognition protein [Source:MGI Symbol;Acc:MGI:2685821]	288	699	39.9657	71.5101	0.839385
ENSMUST00000037472	ENSMUST00000037472	MGI:2142195	Leng8	leukocyte receptor cluster (LRC) member 8 [Source:MGI Symbol;Acc:MGI:2142195]	316	698	43.8512	71.4078	0.703464
ENSMUST00000042410	ENSMUST00000042410	MGI:1277162	Cdk6	cyclin-dependent kinase 6 [Source:MGI Symbol;Acc:MGI:1277162]	123	696	17.0687	71.2032	2.06059
ENSMUST00000078084	ENSMUST00000078084	MGI:106498	D4Wsu53e	DNA segment, Chr 4, Wayne State University 53, expressed [Source:MGI Symbol;Acc:MGI:106498]	432	696	59.9485	71.2032	0.248218
ENSMUST00000088476	ENSMUST00000088476	MGI:1934659	Pi15	peptidase inhibitor 15 [Source:MGI Symbol;Acc:MGI:1934659]	600	693	83.2618	70.8963	-0.231946
ENSMUST00000059472	ENSMUST00000059472	MGI:2443731	Mat2a	methionine adenosyltransferase II, alpha [Source:MGI Symbol;Acc:MGI:2443731]	316	692	43.8512	70.794	0.691009
ENSMUST00000108670	ENSMUST00000108670	MGI:3045246	Arhgef15	Rho guanine nucleotide exchange factor (GEF) 15 [Source:MGI Symbol;Acc:MGI:3045246]	415	692	57.5894	70.794	0.297822
ENSMUST00000131312	ENSMUST00000131312	MGI:1914125	Swt1	SWT1 RNA endoribonuclease homolog (S. cerevisiae) [Source:MGI Symbol;Acc:MGI:1914125]	562	690	77.9886	70.5894	-0.143812
ENSMUST00000028016	ENSMUST00000028016	MGI:1913754	Prrc2c	proline-rich coiled-coil 2C [Source:MGI Symbol;Acc:MGI:1913754]	406	686	56.3405	70.1801	0.31689
ENSMUST00000060608	ENSMUST00000060608	MGI:1925201	Cyp20a1	cytochrome P450, family 20, subfamily a, polypeptide 1 [Source:MGI Symbol;Acc:MGI:1925201]	409	685	56.7568	70.0778	0.304165
ENSMUST00000002095	ENSMUST00000002095	MGI:96995	Mll1	myeloid/lymphoid or mixed-lineage leukemia 1 [Source:MGI Symbol;Acc:MGI:96995]	405	684	56.2017	69.9755	0.316236
ENSMUST00000128960	ENSMUST00000128960	MGI:1921288	4632419I22Rik	RIKEN cDNA 4632419I22 gene [Source:MGI Symbol;Acc:MGI:1921288]	410	680	56.8956	69.5663	0.290072
ENSMUST00000082862	ENSMUST00000082862	MGI:109558	Terc	telomerase RNA component [Source:MGI Symbol;Acc:MGI:109558]	292	679	40.5208	69.464	0.777605
ENSMUST00000181186	ENSMUST00000181186		AC182748.1		1085	679	150.565	69.464	-1.11605
ENSMUST00000133984	ENSMUST00000133984	MGI:1914220	Ssbp2	single-stranded DNA binding protein 2 [Source:MGI Symbol;Acc:MGI:1914220]	509	657	70.6338	67.2133	-0.0716107
ENSMUST00000098942	ENSMUST00000098942	MGI:1914879	Spc24	SPC24, NDC80 kinetochore complex component, homolog (S. cerevisiae) [Source:MGI Symbol;Acc:MGI:1914879]	385	655	53.4263	67.0087	0.326798
ENSMUST00000149629	ENSMUST00000149629	MGI:2442663	Hectd2	HECT domain containing 2 [Source:MGI Symbol;Acc:MGI:2442663]	472	654	65.4993	66.9064	0.0306654
ENSMUST00000148700	ENSMUST00000148700	MGI:3650817	Gm14340	predicted gene 14340 [Source:MGI Symbol;Acc:MGI:3650817]	445	649	61.7525	66.3949	0.104575
ENSMUST00000027494	ENSMUST00000027494	MGI:1913635	Ppp1r7	protein phosphatase 1, regulatory (inhibitor) subunit 7 [Source:MGI Symbol;Acc:MGI:1913635]	379	646	52.5937	66.088	0.329498
ENSMUST00000006525	ENSMUST00000006525	MGI:1338013	Cbfa2t3	core-binding factor, runt domain, alpha subunit 2, translocated to, 3 (human) [Source:MGI Symbol;Acc:MGI:1338013]	206	641	28.5866	65.5765	1.19784
ENSMUST00000099972	ENSMUST00000099972	MGI:96603	Itga4	integrin alpha 4 [Source:MGI Symbol;Acc:MGI:96603]	452	640	62.7239	65.4742	0.0619107
ENSMUST00000024811	ENSMUST00000024811	MGI:97584	Pim1	proviral integration site 1 [Source:MGI Symbol;Acc:MGI:97584]	266	638	36.9127	65.2696	0.822292
ENSMUST00000181149	ENSMUST00000181149		AC163677.1		382	636	53.01	65.065	0.295616
ENSMUST00000047864	ENSMUST00000047864	MGI:95288	Eef2	eukaryotic translation elongation factor 2 [Source:MGI Symbol;Acc:MGI:95288]	538	635	74.6581	64.9627	-0.200688
ENSMUST00000062264	ENSMUST00000062264	MGI:1934811	Nucks1	nuclear casein kinase and cyclin-dependent kinase substrate 1 [Source:MGI Symbol;Acc:MGI:1934811]	164	630	22.7582	64.4512	1.50182
ENSMUST00000090178	ENSMUST00000090178	MGI:1917854	Dnajb14	DnaJ (Hsp40) homolog, subfamily B, member 14 [Source:MGI Symbol;Acc:MGI:1917854]	384	628	53.2876	64.2465	0.26982
ENSMUST00000178343	ENSMUST00000178343		AC149090.1		359	624	49.8183	63.8373	0.357724
ENSMUST00000093271	ENSMUST00000093271	MGI:1340051	Gpr56	G protein-coupled receptor 56 [Source:MGI Symbol;Acc:MGI:1340051]	202	623	28.0315	63.735	1.18504
ENSMUST00000090043	ENSMUST00000090043	MGI:3708663	Gm9864	predicted gene 9864 [Source:MGI Symbol;Acc:MGI:3708663]	306	623	42.4635	63.735	0.585862
ENSMUST00000151698	ENSMUST00000151698	MGI:108046	Laptm5	lysosomal-associated protein transmembrane 5 [Source:MGI Symbol;Acc:MGI:108046]	132	622	18.3176	63.6327	1.79654
ENSMUST00000043342	ENSMUST00000043342	MGI:1916990	Dph5	DPH5 homolog (S. cerevisiae) [Source:MGI Symbol;Acc:MGI:1916990]	374	622	51.8999	63.6327	0.294038
ENSMUST00000165664	ENSMUST00000165664	MGI:103159	Cish	cytokine inducible SH2-containing protein [Source:MGI Symbol;Acc:MGI:103159]	246	620	34.1374	63.4281	0.893772
ENSMUST00000137473	ENSMUST00000137473	MGI:2444031	Alg6	asparagine-linked glycosylation 6 (alpha-1,3,-glucosyltransferase) [Source:MGI Symbol;Acc:MGI:2444031]	262	618	36.3577	63.2235	0.798202
ENSMUST00000033761	ENSMUST00000033761	MGI:105942	Hcfc1	host cell factor C1 [Source:MGI Symbol;Acc:MGI:105942]	325	608	45.1002	62.2005	0.463793
ENSMUST00000117721	ENSMUST00000117721	MGI:1919989	Zkscan3	zinc finger with KRAB and SCAN domains 3 [Source:MGI Symbol;Acc:MGI:1919989]	327	608	45.3777	62.2005	0.454942
ENSMUST00000026476	ENSMUST00000026476	MGI:106378	Mbd6	methyl-CpG binding domain protein 6 [Source:MGI Symbol;Acc:MGI:106378]	166	606	23.0358	61.9959	1.4283
ENSMUST00000132617	ENSMUST00000132617	MGI:2443281	Ppip5k1	diphosphoinositol pentakisphosphate kinase 1 [Source:MGI Symbol;Acc:MGI:2443281]	340	601	47.1817	61.4844	0.381992
ENSMUST00000044423	ENSMUST00000044423	MGI:2442836	Brip1	BRCA1 interacting protein C-terminal helicase 1 [Source:MGI Symbol;Acc:MGI:2442836]	256	592	35.525	60.5636	0.769615
ENSMUST00000035635	ENSMUST00000035635	MGI:2155456	Bmp2k	BMP2 inducible kinase [Source:MGI Symbol;Acc:MGI:2155456]	342	590	47.4592	60.359	0.34688
ENSMUST00000180477	ENSMUST00000180477		AC170752.1		358	589	49.6796	60.2567	0.27847
ENSMUST00000136144	ENSMUST00000136144	MGI:2682952	Prdm10	PR domain containing 10 [Source:MGI Symbol;Acc:MGI:2682952]	344	588	47.7368	60.1544	0.333569
ENSMUST00000165117	ENSMUST00000165117	MGI:1277162	Cdk6	cyclin-dependent kinase 6 [Source:MGI Symbol;Acc:MGI:1277162]	151	587	20.9542	60.0521	1.51897
ENSMUST00000006625	ENSMUST00000006625	MGI:1929092	Rbm14	RNA binding motif protein 14 [Source:MGI Symbol;Acc:MGI:1929092]	215	586	29.8355	59.9498	1.00673
ENSMUST00000181063	ENSMUST00000181063	MGI:3652301	Gm11960	predicted gene 11960 [Source:MGI Symbol;Acc:MGI:3652301]	439	583	60.9199	59.6429	-0.0305634
ENSMUST00000029199	ENSMUST00000029199	MGI:1195270	Zmat3	zinc finger matrin type 3 [Source:MGI Symbol;Acc:MGI:1195270]	260	582	36.0801	59.5406	0.722669
ENSMUST00000010239	ENSMUST00000010239	MGI:96955	Slc3a2	solute carrier family 3 (activators of dibasic and neutral amino acid transport), member 2 [Source:MGI Symbol;Acc:MGI:96955]	335	582	46.4879	59.5406	0.35702
ENSMUST00000111820	ENSMUST00000111820	MGI:5317335	Tmppe	transmembrane protein with metallophosphoesterase domain [Source:MGI Symbol;Acc:MGI:5317335]	272	581	37.7454	59.4383	0.655093
ENSMUST00000021282	ENSMUST00000021282	MGI:2684864	Pfas	phosphoribosylformylglycinamidine synthase (FGAR amidotransferase) [Source:MGI Symbol;Acc:MGI:2684864]	282	580	39.1331	59.336	0.600519
ENSMUST00000027438	ENSMUST00000027438	MGI:97286	Ncl	nucleolin [Source:MGI Symbol;Acc:MGI:97286]	368	579	51.0673	59.2337	0.214019
ENSMUST00000115487	ENSMUST00000115487	MGI:1919016	Raver1	ribonucleoprotein, PTB-binding 1 [Source:MGI Symbol;Acc:MGI:1919016]	251	577	34.8312	59.0291	0.761046
ENSMUST00000145362	ENSMUST00000145362	MGI:2442133	Zc3h12b	zinc finger CCCH-type containing 12B [Source:MGI Symbol;Acc:MGI:2442133]	287	575	39.8269	58.8245	0.562673
ENSMUST00000034740	ENSMUST00000034740	MGI:97297	Nedd4	neural precursor cell expressed, developmentally down-regulated 4 [Source:MGI Symbol;Acc:MGI:97297]	225	574	31.2232	58.7222	0.911287
ENSMUST00000174512	ENSMUST00000174512	MGI:107547	Zfp101	zinc finger protein 101 [Source:MGI Symbol;Acc:MGI:107547]	258	574	35.8026	58.7222	0.713841
ENSMUST00000144897	ENSMUST00000144897	MGI:1915220	Slx1b	SLX1 structure-specific endonuclease subunit homolog B (S. cerevisiae) [Source:MGI Symbol;Acc:MGI:1915220]	359	573	49.8183	58.6199	0.234713
ENSMUST00000124608	ENSMUST00000124608	MGI:104808	Lcp1	lymphocyte cytosolic protein 1 [Source:MGI Symbol;Acc:MGI:104808]	438	571	60.7811	58.4153	-0.0572785
ENSMUST00000027146	ENSMUST00000027146	MGI:1342541	Ikzf2	IKAROS family zinc finger 2 [Source:MGI Symbol;Acc:MGI:1342541]	231	570	32.0558	58.313	0.863231
ENSMUST00000020288	ENSMUST00000020288	MGI:109198	Eif4ebp2	eukaryotic translation initiation factor 4E binding protein 2 [Source:MGI Symbol;Acc:MGI:109198]	102	568	14.1545	58.1083	2.03748
ENSMUST00000078717	ENSMUST00000078717	MGI:2443542	Lrrc58	leucine rich repeat containing 58 [Source:MGI Symbol;Acc:MGI:2443542]	270	568	37.4678	58.1083	0.633093
ENSMUST00000022971	ENSMUST00000022971	MGI:97250	Myc	myelocytomatosis oncogene [Source:MGI Symbol;Acc:MGI:97250]	281	568	38.9943	58.1083	0.575482
ENSMUST00000106899	ENSMUST00000106899	MGI:105303	Cxcr2	chemokine (C-X-C motif) receptor 2 [Source:MGI Symbol;Acc:MGI:105303]	356	566	49.402	57.9037	0.229086
ENSMUST00000087942	ENSMUST00000087942	MGI:3045302	Rab44	RAB44, member RAS oncogene family [Source:MGI Symbol;Acc:MGI:3045302]	299	565	41.4921	57.8014	0.478267
ENSMUST00000097473	ENSMUST00000097473	MGI:1921173	Tmco1	transmembrane and coiled-coil domains 1 [Source:MGI Symbol;Acc:MGI:1921173]	782	563	108.518	57.5968	-0.913872
ENSMUST00000005578	ENSMUST00000005578	MGI:1918972	Cic	capicua homolog (Drosophila) [Source:MGI Symbol;Acc:MGI:1918972]	182	558	25.2561	57.0853	1.17649
ENSMUST00000026698	ENSMUST00000026698	MGI:1351317	Podxl	podocalyxin-like [Source:MGI Symbol;Acc:MGI:1351317]	255	555	35.3863	56.7784	0.682152
ENSMUST00000007216	ENSMUST00000007216	MGI:1298405	Ap2m1	adaptor-related protein complex 2, mu 1 subunit [Source:MGI Symbol;Acc:MGI:1298405]	259	554	35.9414	56.6761	0.657095
ENSMUST00000181241	ENSMUST00000181241		BX284639.1		302	554	41.9085	56.6761	0.435499
ENSMUST00000054014	ENSMUST00000054014	MGI:1914290	Ddx17	DEAD (Asp-Glu-Ala-Asp) box polypeptide 17 [Source:MGI Symbol;Acc:MGI:1914290]	228	551	31.6395	56.3692	0.83318
ENSMUST00000000188	ENSMUST00000000188	MGI:88314	Ccnd2	cyclin D2 [Source:MGI Symbol;Acc:MGI:88314]	147	550	20.3991	56.2669	1.46378
ENSMUST00000017637	ENSMUST00000017637	MGI:96439	Igfbp4	insulin-like growth factor binding protein 4 [Source:MGI Symbol;Acc:MGI:96439]	265	550	36.774	56.2669	0.613601
ENSMUST00000023520	ENSMUST00000023520	MGI:103190	Muc13	mucin 13, epithelial transmembrane [Source:MGI Symbol;Acc:MGI:103190]	265	547	36.774	55.96	0.60571
ENSMUST00000161170	ENSMUST00000161170	MGI:99210	Zfp9	zinc finger protein 9 [Source:MGI Symbol;Acc:MGI:99210]	311	547	43.1574	55.96	0.374788
ENSMUST00000044730	ENSMUST00000044730	MGI:1935145	Mllt6	myeloid/lymphoid or mixed-lineage leukemia (trithorax homolog, Drosophila); translocated to, 6 [Source:MGI Symbol;Acc:MGI:1935145]	237	545	32.8884	55.7554	0.761531
ENSMUST00000002678	ENSMUST00000002678	MGI:98725	Tgfb1	transforming growth factor, beta 1 [Source:MGI Symbol;Acc:MGI:98725]	289	545	40.1044	55.7554	0.475348
ENSMUST00000051698	ENSMUST00000051698	MGI:106651	Ly6e	lymphocyte antigen 6 complex, locus E [Source:MGI Symbol;Acc:MGI:106651]	219	538	30.3906	55.0392	0.856837
ENSMUST00000127757	ENSMUST00000127757	MGI:3779256	Gm11033	predicted gene 11033 [Source:MGI Symbol;Acc:MGI:3779256]	470	537	65.2218	54.9369	-0.247577
ENSMUST00000040474	ENSMUST00000040474	MGI:2443456	Tbc1d24	TBC1 domain family, member 24 [Source:MGI Symbol;Acc:MGI:2443456]	243	536	33.721	54.8346	0.701438
ENSMUST00000001975	ENSMUST00000001975	MGI:1914080	Nacc1	nucleus accumbens associated 1, BEN and BTB (POZ) domain containing [Source:MGI Symbol;Acc:MGI:1914080]	210	535	29.1416	54.7323	0.909311
ENSMUST00000044783	ENSMUST00000044783	MGI:2384784	Eif4g1	eukaryotic translation initiation factor 4, gamma 1 [Source:MGI Symbol;Acc:MGI:2384784]	315	535	43.7125	54.7323	0.324349
ENSMUST00000039267	ENSMUST00000039267	MGI:2444748	Chd7	chromodomain helicase DNA binding protein 7 [Source:MGI Symbol;Acc:MGI:2444748]	18	534	2.49785	54.63	4.45093
ENSMUST00000005017	ENSMUST00000005017	MGI:1194494	Hdgf	hepatoma-derived growth factor [Source:MGI Symbol;Acc:MGI:1194494]	219	534	30.3906	54.63	0.84607
ENSMUST00000022696	ENSMUST00000022696	MGI:1929705	Xpo7	exportin 7 [Source:MGI Symbol;Acc:MGI:1929705]	280	534	38.8555	54.63	0.491575
ENSMUST00000045557	ENSMUST00000045557	MGI:1298205	Slc7a5	solute carrier family 7 (cationic amino acid transporter, y+ system), member 5 [Source:MGI Symbol;Acc:MGI:1298205]	181	533	25.1173	54.5277	1.11831
ENSMUST00000078547	ENSMUST00000078547	MGI:2447871	Sec22c	SEC22 vesicle trafficking protein homolog C (S. cerevisiae) [Source:MGI Symbol;Acc:MGI:2447871]	377	533	52.3162	54.5277	0.0597326
ENSMUST00000106888	ENSMUST00000106888	MGI:3030447	Olfr613	olfactory receptor 613 [Source:MGI Symbol;Acc:MGI:3030447]	409	531	56.7568	54.3231	-0.0632274
ENSMUST00000099007	ENSMUST00000099007	MGI:3708667	Gm14296	predicted gene 14296 [Source:MGI Symbol;Acc:MGI:3708667]	280	530	38.8555	54.2208	0.480727
ENSMUST00000032469	ENSMUST00000032469	MGI:1333850	Mbd4	methyl-CpG binding domain protein 4 [Source:MGI Symbol;Acc:MGI:1333850]	314	529	43.5737	54.1185	0.312665
ENSMUST00000088357	ENSMUST00000088357	MGI:104725	Atn1	atrophin 1 [Source:MGI Symbol;Acc:MGI:104725]	140	528	19.4278	54.0162	1.47527
ENSMUST00000036753	ENSMUST00000036753	MGI:1100537	Mid1	midline 1 [Source:MGI Symbol;Acc:MGI:1100537]	716	528	99.3591	54.0162	-0.87926
ENSMUST00000034834	ENSMUST00000034834	MGI:97591	Pkm	pyruvate kinase, muscle [Source:MGI Symbol;Acc:MGI:97591]	250	527	34.6924	53.9139	0.636036
ENSMUST00000130871	ENSMUST00000130871	MGI:1929069	Rnf8	ring finger protein 8 [Source:MGI Symbol;Acc:MGI:1929069]	281	527	38.9943	53.9139	0.467394
ENSMUST00000030187	ENSMUST00000030187	MGI:1099832	Tln1	talin 1 [Source:MGI Symbol;Acc:MGI:1099832]	275	525	38.1617	53.7093	0.493047
ENSMUST00000090945	ENSMUST00000090945	MGI:1859547	Syt11	synaptotagmin XI [Source:MGI Symbol;Acc:MGI:1859547]	358	524	49.6796	53.607	0.109769
ENSMUST00000153841	ENSMUST00000153841	MGI:1915276	2810417H13Rik	RIKEN cDNA 2810417H13 gene [Source:MGI Symbol;Acc:MGI:1915276]	235	522	32.6109	53.4024	0.711551
ENSMUST00000042052	ENSMUST00000042052	MGI:2384768	Hectd1	HECT domain containing 1 [Source:MGI Symbol;Acc:MGI:2384768]	344	522	47.7368	53.4024	0.161803
ENSMUST00000003726	ENSMUST00000003726	MGI:1888520	Brd4	bromodomain containing 4 [Source:MGI Symbol;Acc:MGI:1888520]	173	521	24.0072	53.3001	1.15067
ENSMUST00000145193	ENSMUST00000145193	MGI:2443189	Vps39	vacuolar protein sorting 39 (yeast) [Source:MGI Symbol;Acc:MGI:2443189]	392	520	54.3977	53.1978	-0.0321804
ENSMUST00000135110	ENSMUST00000135110	MGI:3584452	A730017L22Rik	RIKEN cDNA A730017L22 gene [Source:MGI Symbol;Acc:MGI:3584452]	357	518	49.5408	52.9932	0.0971896
ENSMUST00000164042	ENSMUST00000164042	MGI:4937189	Gm17555	predicted gene, 17555 [Source:MGI Symbol;Acc:MGI:4937189]	392	518	54.3977	52.9932	-0.0377399
ENSMUST00000043531	ENSMUST00000043531	MGI:1922937	Fam65a	family with sequence similarity 65, member A [Source:MGI Symbol;Acc:MGI:1922937]	221	517	30.6681	52.8909	0.78628
ENSMUST00000019276	ENSMUST00000019276	MGI:2441726	BC005537	cDNA sequence BC005537 [Source:MGI Symbol;Acc:MGI:2441726]	162	516	22.4807	52.7886	1.23154
ENSMUST00000160628	ENSMUST00000160628	MGI:1916296	Isca1	iron-sulfur cluster assembly 1 homolog (S. cerevisiae) [Source:MGI Symbol;Acc:MGI:1916296]	294	516	40.7983	52.7886	0.371717
ENSMUST00000086519	ENSMUST00000086519	MGI:1927636	Rplp0	ribosomal protein, large, P0 [Source:MGI Symbol;Acc:MGI:1927636]	389	515	53.9814	52.6863	-0.0350361
ENSMUST00000133450	ENSMUST00000133450	MGI:2681852	Ccdc144b	coiled-coil domain containing 144B [Source:MGI Symbol;Acc:MGI:2681852]	579	513	80.3477	52.4817	-0.614443
ENSMUST00000058914	ENSMUST00000058914	MGI:1095409	Tuba1c	tubulin, alpha 1C [Source:MGI Symbol;Acc:MGI:1095409]	176	512	24.4235	52.3794	1.10073
ENSMUST00000044985	ENSMUST00000044985	MGI:2679272	Bahcc1	BAH domain and coiled-coil containing 1 [Source:MGI Symbol;Acc:MGI:2679272]	236	511	32.7497	52.277	0.674698
ENSMUST00000099683	ENSMUST00000099683	MGI:3641657	Gm10800	predicted gene 10800 [Source:MGI Symbol;Acc:MGI:3641657]	1013	511	140.574	52.277	-1.42708
ENSMUST00000090260	ENSMUST00000090260	MGI:3643814	Gm4841	predicted gene 4841 [Source:MGI Symbol;Acc:MGI:3643814]	523	510	72.5766	52.1747	-0.476152
ENSMUST00000170369	ENSMUST00000170369	MGI:1349423	Racgap1	Rac GTPase-activating protein 1 [Source:MGI Symbol;Acc:MGI:1349423]	310	509	43.0186	52.0724	0.275559
ENSMUST00000176108	ENSMUST00000176108	MGI:2441792	A330044P14Rik	RIKEN cDNA A330044P14 gene [Source:MGI Symbol;Acc:MGI:2441792]	472	509	65.4993	52.0724	-0.33096
ENSMUST00000069692	ENSMUST00000069692	MGI:1890393	Zfp277	zinc finger protein 277 [Source:MGI Symbol;Acc:MGI:1890393]	354	508	49.1245	51.9701	0.0812407
ENSMUST00000097822	ENSMUST00000097822	MGI:1916366	Ubr4	ubiquitin protein ligase E3 component n-recognin 4 [Source:MGI Symbol;Acc:MGI:1916366]	511	507	70.9113	51.8678	-0.451176
ENSMUST00000053183	ENSMUST00000053183	MGI:99432	Arf3	ADP-ribosylation factor 3 [Source:MGI Symbol;Acc:MGI:99432]	235	506	32.6109	51.7655	0.666638
ENSMUST00000127799	ENSMUST00000127799	MGI:3644574	Gm6483	predicted gene 6483 [Source:MGI Symbol;Acc:MGI:3644574]	268	505	37.1903	51.6632	0.474212
ENSMUST00000134324	ENSMUST00000134324	MGI:1920629	Dcbld2	discoidin, CUB and LCCL domain containing 2 [Source:MGI Symbol;Acc:MGI:1920629]	925	505	128.362	51.6632	-1.31301
ENSMUST00000087333	ENSMUST00000087333	MGI:2148020	Tmem164	transmembrane protein 164 [Source:MGI Symbol;Acc:MGI:2148020]	149	503	20.6767	51.4586	1.31541
ENSMUST00000073879	ENSMUST00000073879	MGI:109606	Fnbp1	formin binding protein 1 [Source:MGI Symbol;Acc:MGI:109606]	210	503	29.1416	51.4586	0.820331
ENSMUST00000108569	ENSMUST00000108569	MGI:3033473	Vmn1r58	vomeronasal 1 receptor 58 [Source:MGI Symbol;Acc:MGI:3033473]	462	503	64.1116	51.4586	-0.317173
ENSMUST00000001566	ENSMUST00000001566	MGI:107812	Tubb5	tubulin, beta 5 class I [Source:MGI Symbol;Acc:MGI:107812]	191	497	26.505	50.8448	0.939835
ENSMUST00000036691	ENSMUST00000036691	MGI:1923304	Prrc2b	proline-rich coiled-coil 2B [Source:MGI Symbol;Acc:MGI:1923304]	193	497	26.7826	50.8448	0.924807
ENSMUST00000140480	ENSMUST00000140480	MGI:2444631	4932438A13Rik	RIKEN cDNA 4932438A13 gene [Source:MGI Symbol;Acc:MGI:2444631]	324	496	44.9614	50.7425	0.174508
ENSMUST00000180757	ENSMUST00000180757		AC148089.1		328	495	45.5165	50.6402	0.153894
ENSMUST00000133305	ENSMUST00000133305	MGI:1924066	Sdccag8	serologically defined colon cancer antigen 8 [Source:MGI Symbol;Acc:MGI:1924066]	409	494	56.7568	50.5379	-0.167428
ENSMUST00000136011	ENSMUST00000136011	MGI:2652869	BC030499	cDNA sequence BC030499 [Source:MGI Symbol;Acc:MGI:2652869]	297	492	41.2146	50.3333	0.288357
ENSMUST00000139820	ENSMUST00000139820	MGI:1353631	Adat1	adenosine deaminase, tRNA-specific 1 [Source:MGI Symbol;Acc:MGI:1353631]	256	491	35.525	50.231	0.499741
ENSMUST00000138598	ENSMUST00000138598	MGI:3807476	Dynlt1c	dynein light chain Tctex-type 1C [Source:MGI Symbol;Acc:MGI:3807476]	268	491	37.1903	50.231	0.433652
ENSMUST00000177921	ENSMUST00000177921		AC132444.6		662	491	91.8656	50.231	-0.870947
ENSMUST00000157024	ENSMUST00000157024	MGI:1921364	Crot	carnitine O-octanoyltransferase [Source:MGI Symbol;Acc:MGI:1921364]	343	490	47.598	50.1287	0.0747348
ENSMUST00000022469	ENSMUST00000022469	MGI:1928323	Nisch	nischarin [Source:MGI Symbol;Acc:MGI:1928323]	334	489	46.3491	50.0264	0.110148
ENSMUST00000135371	ENSMUST00000135371	MGI:1914487	Cul4a	cullin 4A [Source:MGI Symbol;Acc:MGI:1914487]	390	489	54.1202	50.0264	-0.113478
ENSMUST00000073639	ENSMUST00000073639	MGI:1195275	Rdh1	retinol dehydrogenase 1 (all trans) [Source:MGI Symbol;Acc:MGI:1195275]	411	488	57.0344	49.9241	-0.192096
ENSMUST00000005643	ENSMUST00000005643	MGI:1342295	Celf1	CUGBP, Elav-like family member 1 [Source:MGI Symbol;Acc:MGI:1342295]	123	487	17.0687	49.8218	1.54543
ENSMUST00000109558	ENSMUST00000109558	MGI:1352499	Ndrg3	N-myc downstream regulated gene 3 [Source:MGI Symbol;Acc:MGI:1352499]	308	487	42.7411	49.8218	0.221153
ENSMUST00000085102	ENSMUST00000085102	MGI:103159	Cish	cytokine inducible SH2-containing protein [Source:MGI Symbol;Acc:MGI:103159]	197	486	27.3376	49.7195	0.862922
ENSMUST00000058162	ENSMUST00000058162	MGI:96911	Mafg	v-maf musculoaponeurotic fibrosarcoma oncogene family, protein G (avian) [Source:MGI Symbol;Acc:MGI:96911]	124	484	17.2074	49.5149	1.52483
ENSMUST00000062322	ENSMUST00000062322	MGI:2385096	Pprc1	peroxisome proliferative activated receptor, gamma, coactivator-related 1 [Source:MGI Symbol;Acc:MGI:2385096]	185	484	25.6724	49.5149	0.947643
ENSMUST00000156275	ENSMUST00000156275	MGI:1918470	4933427J07Rik	RIKEN cDNA 4933427J07 gene [Source:MGI Symbol;Acc:MGI:1918470]	1097	483	152.23	49.4126	-1.62331
ENSMUST00000105680	ENSMUST00000105680	MGI:2683486	Rere	arginine glutamic acid dipeptide (RE) repeats [Source:MGI Symbol;Acc:MGI:2683486]	133	482	18.4564	49.3102	1.41777
ENSMUST00000060366	ENSMUST00000060366	MGI:107945	Zfp36l2	zinc finger protein 36, C3H type-like 2 [Source:MGI Symbol;Acc:MGI:107945]	201	481	27.8927	49.2079	0.819003
ENSMUST00000038859	ENSMUST00000038859	MGI:1098211	Pik3cd	phosphatidylinositol 3-kinase catalytic delta polypeptide [Source:MGI Symbol;Acc:MGI:1098211]	248	481	34.4149	49.2079	0.515858
ENSMUST00000037480	ENSMUST00000037480	MGI:1924462	Wipf2	WAS/WASL interacting protein family, member 2 [Source:MGI Symbol;Acc:MGI:1924462]	321	481	44.5451	49.2079	0.143625
ENSMUST00000105336	ENSMUST00000105336	MGI:2143886	Dot1l	DOT1-like, histone H3 methyltransferase (S. cerevisiae) [Source:MGI Symbol;Acc:MGI:2143886]	251	480	34.8312	49.1056	0.495509
ENSMUST00000019514	ENSMUST00000019514	MGI:103249	Calm3	calmodulin 3 [Source:MGI Symbol;Acc:MGI:103249]	99	478	13.7382	48.901	1.83167
ENSMUST00000118152	ENSMUST00000118152	MGI:109372	Cbx5	chromobox 5 [Source:MGI Symbol;Acc:MGI:109372]	187	477	25.9499	48.7987	0.911113
ENSMUST00000147005	ENSMUST00000147005	MGI:2676556	Akap13	A kinase (PRKA) anchor protein 13 [Source:MGI Symbol;Acc:MGI:2676556]	156	476	21.6481	48.6964	1.16958
ENSMUST00000081333	ENSMUST00000081333	MGI:1096879	Fxn	frataxin [Source:MGI Symbol;Acc:MGI:1096879]	247	476	34.2761	48.6964	0.506612
ENSMUST00000055808	ENSMUST00000055808	MGI:108109	Ywhag	tyrosine 3-monooxygenase/tryptophan 5-monooxygenase activation protein, gamma polypeptide [Source:MGI Symbol;Acc:MGI:108109]	108	475	14.9871	48.5941	1.69706
ENSMUST00000099442	ENSMUST00000099442	MGI:2670983	BC025920	cDNA sequence BC025920 [Source:MGI Symbol;Acc:MGI:2670983]	260	475	36.0801	48.5941	0.429578
ENSMUST00000059449	ENSMUST00000059449	MGI:2448547	Ces2b	carboxyesterase 2B [Source:MGI Symbol;Acc:MGI:2448547]	308	475	42.7411	48.5941	0.185159
ENSMUST00000106666	ENSMUST00000106666	MGI:109207	Eif4g2	eukaryotic translation initiation factor 4, gamma 2 [Source:MGI Symbol;Acc:MGI:109207]	286	474	39.6881	48.4918	0.289034
ENSMUST00000095926	ENSMUST00000095926	MGI:1920494	Prl8a1	prolactin family 8, subfamily a, member 1 [Source:MGI Symbol;Acc:MGI:1920494]	422	473	58.5608	48.3895	-0.275241
ENSMUST00000144678	ENSMUST00000144678	MGI:2147897	Cenpi	centromere protein I [Source:MGI Symbol;Acc:MGI:2147897]	305	472	42.3248	48.2872	0.190139
ENSMUST00000015197	ENSMUST00000015197	MGI:95662	Gata2	GATA binding protein 2 [Source:MGI Symbol;Acc:MGI:95662]	171	471	23.7296	48.1849	1.02189
ENSMUST00000012612	ENSMUST00000012612	MGI:106374	Zmiz2	zinc finger, MIZ-type containing 2 [Source:MGI Symbol;Acc:MGI:106374]	156	469	21.6481	47.9803	1.1482
ENSMUST00000030489	ENSMUST00000030489	MGI:98480	Tal1	T cell acute lymphocytic leukemia 1 [Source:MGI Symbol;Acc:MGI:98480]	237	469	32.8884	47.9803	0.544862
ENSMUST00000153004	ENSMUST00000153004	MGI:109275	Trim24	tripartite motif-containing 24 [Source:MGI Symbol;Acc:MGI:109275]	338	469	46.9042	47.9803	0.0327263
ENSMUST00000047075	ENSMUST00000047075	MGI:2446244	Setd1a	SET domain containing 1A [Source:MGI Symbol;Acc:MGI:2446244]	234	467	32.4721	47.7757	0.557076
ENSMUST00000089461	ENSMUST00000089461	MGI:1332236	Cds2	CDP-diacylglycerol synthase (phosphatidate cytidylyltransferase) 2 [Source:MGI Symbol;Acc:MGI:1332236]	110	466	15.2647	47.6734	1.64299
ENSMUST00000037748	ENSMUST00000037748	MGI:1858195	Hnrnpu	heterogeneous nuclear ribonucleoprotein U [Source:MGI Symbol;Acc:MGI:1858195]	336	466	46.6266	47.6734	0.0320303
ENSMUST00000112370	ENSMUST00000112370	MGI:2442786	Mfsd4	major facilitator superfamily domain containing 4 [Source:MGI Symbol;Acc:MGI:2442786]	221	464	30.6681	47.4688	0.63024
ENSMUST00000062118	ENSMUST00000062118	MGI:2442480	Pigv	phosphatidylinositol glycan anchor biosynthesis, class V [Source:MGI Symbol;Acc:MGI:2442480]	256	464	35.525	47.4688	0.418143
ENSMUST00000098346	ENSMUST00000098346	MGI:2150656	Man2a2	mannosidase 2, alpha 2 [Source:MGI Symbol;Acc:MGI:2150656]	290	464	40.2432	47.4688	0.238234
ENSMUST00000180729	ENSMUST00000180729		AC153801.1		506	464	70.2175	47.4688	-0.564851
ENSMUST00000133907	ENSMUST00000133907	MGI:1101358	Npepps	aminopeptidase puromycin sensitive [Source:MGI Symbol;Acc:MGI:1101358]	296	461	41.0758	47.1619	0.199331
ENSMUST00000023486	ENSMUST00000023486	MGI:98822	Tfrc	transferrin receptor [Source:MGI Symbol;Acc:MGI:98822]	218	458	30.2518	46.855	0.631181
ENSMUST00000170941	ENSMUST00000170941	MGI:2147038	Treml2	triggering receptor expressed on myeloid cells-like 2 [Source:MGI Symbol;Acc:MGI:2147038]	228	458	31.6395	46.855	0.566475
ENSMUST00000021028	ENSMUST00000021028	MGI:96612	Itgb3	integrin beta 3 [Source:MGI Symbol;Acc:MGI:96612]	107	457	14.8484	46.7527	1.65474
ENSMUST00000060043	ENSMUST00000060043	MGI:2442092	Wnk1	WNK lysine deficient protein kinase 1 [Source:MGI Symbol;Acc:MGI:2442092]	244	457	33.8598	46.7527	0.465475
ENSMUST00000146839	ENSMUST00000146839	MGI:109151	Ltbp1	latent transforming growth factor beta binding protein 1 [Source:MGI Symbol;Acc:MGI:109151]	300	456	41.6309	46.6504	0.164233
ENSMUST00000098333	ENSMUST00000098333	MGI:1924337	Ankrd11	ankyrin repeat domain 11 [Source:MGI Symbol;Acc:MGI:1924337]	278	454	38.578	46.4458	0.267769
ENSMUST00000182838	ENSMUST00000182838	MGI:98355	Sos2	son of sevenless homolog 2 (Drosophila) [Source:MGI Symbol;Acc:MGI:98355]	294	453	40.7983	46.3435	0.183857
ENSMUST00000028279	ENSMUST00000028279	MGI:104626	Strbp	spermatid perinuclear RNA binding protein [Source:MGI Symbol;Acc:MGI:104626]	201	451	27.8927	46.1388	0.726094
ENSMUST00000139071	ENSMUST00000139071	MGI:2444516	Iffo1	intermediate filament family orphan 1 [Source:MGI Symbol;Acc:MGI:2444516]	248	447	34.4149	45.7296	0.410096
ENSMUST00000181482	ENSMUST00000181482		AC027184.1		223	446	30.9456	45.6273	0.560162
ENSMUST00000025193	ENSMUST00000025193	MGI:99495	Brd2	bromodomain containing 2 [Source:MGI Symbol;Acc:MGI:99495]	251	446	34.8312	45.6273	0.389518
ENSMUST00000040202	ENSMUST00000040202	MGI:2446242	Atxn2l	ataxin 2-like [Source:MGI Symbol;Acc:MGI:2446242]	341	446	47.3205	45.6273	-0.0525664
ENSMUST00000073942	ENSMUST00000073942	MGI:1918123	Cnbd2	cyclic nucleotide binding domain containing 2 [Source:MGI Symbol;Acc:MGI:1918123]	226	444	31.362	45.4227	0.534399
ENSMUST00000169312	ENSMUST00000169312	MGI:2443370	Chtf8	CTF8, chromosome transmission fidelity factor 8 [Source:MGI Symbol;Acc:MGI:2443370]	129	441	17.9013	45.1158	1.33357
ENSMUST00000078886	ENSMUST00000078886	MGI:1891706	Spen	SPEN homolog, transcriptional regulator (Drosophila) [Source:MGI Symbol;Acc:MGI:1891706]	248	441	34.4149	45.1158	0.3906
ENSMUST00000134544	ENSMUST00000134544	MGI:1351638	Mkln1	muskelin 1, intracellular mediator containing kelch motifs [Source:MGI Symbol;Acc:MGI:1351638]	328	440	45.5165	45.0135	-0.0160307
ENSMUST00000102591	ENSMUST00000102591	MGI:1924049	Tmem234	transmembrane protein 234 [Source:MGI Symbol;Acc:MGI:1924049]	194	437	26.9213	44.7066	0.731738
ENSMUST00000092003	ENSMUST00000092003	MGI:1922552	Asxl2	additional sex combs like 2 (Drosophila) [Source:MGI Symbol;Acc:MGI:1922552]	233	437	32.3333	44.7066	0.467465
ENSMUST00000098789	ENSMUST00000098789	MGI:2682314	Zc3h4	zinc finger CCCH-type containing 4 [Source:MGI Symbol;Acc:MGI:2682314]	192	436	26.6438	44.6043	0.743383
ENSMUST00000159255	ENSMUST00000159255	MGI:1918699	Mettl13	methyltransferase like 13 [Source:MGI Symbol;Acc:MGI:1918699]	228	436	31.6395	44.6043	0.495456
ENSMUST00000074733	ENSMUST00000074733	MGI:1277214	Sept11	septin 11 [Source:MGI Symbol;Acc:MGI:1277214]	104	435	14.4321	44.502	1.62459
ENSMUST00000153383	ENSMUST00000153383	MGI:1917811	Txndc16	thioredoxin domain containing 16 [Source:MGI Symbol;Acc:MGI:1917811]	271	435	37.6066	44.502	0.242884
ENSMUST00000158323	ENSMUST00000158323	MGI:5453039	Gm23262	predicted gene, 23262 [Source:MGI Symbol;Acc:MGI:5453039]	94	434	13.0444	44.3997	1.76712
ENSMUST00000019470	ENSMUST00000019470	MGI:1096366	Psme3	proteaseome (prosome, macropain) 28 subunit, 3 [Source:MGI Symbol;Acc:MGI:1096366]	117	432	16.2361	44.1951	1.44468
ENSMUST00000055844	ENSMUST00000055844	MGI:1919223	Rbpms2	RNA binding protein with multiple splicing 2 [Source:MGI Symbol;Acc:MGI:1919223]	102	430	14.1545	43.9905	1.63593
ENSMUST00000084838	ENSMUST00000084838	MGI:96617	Cd47	CD47 antigen (Rh-related antigen, integrin-associated signal transducer) [Source:MGI Symbol;Acc:MGI:96617]	180	429	24.9785	43.8882	0.813142
ENSMUST00000053969	ENSMUST00000053969	MGI:2443679	Sipa1l1	signal-induced proliferation-associated 1 like 1 [Source:MGI Symbol;Acc:MGI:2443679]	254	429	35.2475	43.8882	0.316311
ENSMUST00000020579	ENSMUST00000020579	MGI:104667	Hmmr	hyaluronan mediated motility receptor (RHAMM) [Source:MGI Symbol;Acc:MGI:104667]	210	427	29.1416	43.6836	0.584008
ENSMUST00000024879	ENSMUST00000024879	MGI:1276108	Birc6	baculoviral IAP repeat-containing 6 [Source:MGI Symbol;Acc:MGI:1276108]	244	426	33.8598	43.5813	0.364134
ENSMUST00000065103	ENSMUST00000065103	MGI:1913473	Mrpl35	mitochondrial ribosomal protein L35 [Source:MGI Symbol;Acc:MGI:1913473]	237	425	32.8884	43.479	0.402737
ENSMUST00000021761	ENSMUST00000021761	MGI:97904	Trim27	tripartite motif-containing 27 [Source:MGI Symbol;Acc:MGI:97904]	257	425	35.6638	43.479	0.285856
ENSMUST00000151538	ENSMUST00000151538	MGI:3650192	Gm14077	predicted gene 14077 [Source:MGI Symbol;Acc:MGI:3650192]	336	425	46.6266	43.479	-0.100837
ENSMUST00000133107	ENSMUST00000133107	MGI:1354944	Orc3	origin recognition complex, subunit 3 [Source:MGI Symbol;Acc:MGI:1354944]	226	424	31.362	43.3767	0.467903
ENSMUST00000042661	ENSMUST00000042661	MGI:1925589	Ttyh3	tweety homolog 3 (Drosophila) [Source:MGI Symbol;Acc:MGI:1925589]	84	423	11.6567	43.2743	1.89236
ENSMUST00000180696	ENSMUST00000180696		AC157896.1		287	423	39.8269	43.2743	0.119769
ENSMUST00000171433	ENSMUST00000171433	MGI:1100537	Mid1	midline 1 [Source:MGI Symbol;Acc:MGI:1100537]	649	423	90.0615	43.2743	-1.0574
ENSMUST00000127890	ENSMUST00000127890	MGI:2679255	Ssh2	slingshot homolog 2 (Drosophila) [Source:MGI Symbol;Acc:MGI:2679255]	329	422	45.6552	43.172	-0.080683
ENSMUST00000152751	ENSMUST00000152751	MGI:2446977	Kif18a	kinesin family member 18A [Source:MGI Symbol;Acc:MGI:2446977]	217	421	30.113	43.0697	0.516287
ENSMUST00000126240	ENSMUST00000126240	MGI:3650687	Gm13613	predicted gene 13613 [Source:MGI Symbol;Acc:MGI:3650687]	297	421	41.2146	43.0697	0.0635189
ENSMUST00000045633	ENSMUST00000045633	MGI:106181	Mybbp1a	MYB binding protein (P160) 1a [Source:MGI Symbol;Acc:MGI:106181]	222	420	30.8069	42.9674	0.479991
ENSMUST00000038388	ENSMUST00000038388	MGI:2441787	A230046K03Rik	RIKEN cDNA A230046K03 gene [Source:MGI Symbol;Acc:MGI:2441787]	259	420	35.9414	42.9674	0.257599
ENSMUST00000059644	ENSMUST00000059644	MGI:1919670	Rbm33	RNA binding motif protein 33 [Source:MGI Symbol;Acc:MGI:1919670]	189	416	26.2275	42.5582	0.698359
ENSMUST00000148005	ENSMUST00000148005	MGI:97005	Mmp12	matrix metallopeptidase 12 [Source:MGI Symbol;Acc:MGI:97005]	286	416	39.6881	42.5582	0.10073
ENSMUST00000144339	ENSMUST00000144339	MGI:3801909	Gm16041	predicted gene 16041 [Source:MGI Symbol;Acc:MGI:3801909]	287	416	39.8269	42.5582	0.0956944
ENSMUST00000174660	ENSMUST00000174660	MGI:1338801	Cyfip1	cytoplasmic FMR1 interacting protein 1 [Source:MGI Symbol;Acc:MGI:1338801]	220	415	30.5293	42.4559	0.475769
ENSMUST00000182500	ENSMUST00000182500	MGI:2180003	Xpnpep1	X-prolyl aminopeptidase (aminopeptidase P) 1, soluble [Source:MGI Symbol;Acc:MGI:2180003]	303	415	42.0472	42.4559	0.0139552
ENSMUST00000031727	ENSMUST00000031727	MGI:1888677	Gigyf1	GRB10 interacting GYF protein 1 [Source:MGI Symbol;Acc:MGI:1888677]	188	414	26.0887	42.3536	0.69906
ENSMUST00000108223	ENSMUST00000108223	MGI:2446235	Zfp940	zinc finger protein 940 [Source:MGI Symbol;Acc:MGI:2446235]	251	414	34.8312	42.3536	0.282105
ENSMUST00000148255	ENSMUST00000148255	MGI:1913898	Tpgs2	tubulin polyglutamylase complex subunit 2 [Source:MGI Symbol;Acc:MGI:1913898]	334	414	46.3491	42.3536	-0.130056
ENSMUST00000083007	ENSMUST00000083007	MGI:5453015	Gm23238	predicted gene, 23238 [Source:MGI Symbol;Acc:MGI:5453015]	184	413	25.5336	42.2513	0.726598
ENSMUST00000036158	ENSMUST00000036158	MGI:1915093	Slc35a4	solute carrier family 35, member A4 [Source:MGI Symbol;Acc:MGI:1915093]	70	412	9.71388	42.149	2.11738
ENSMUST00000071642	ENSMUST00000071642	MGI:1926159	Mdn1	midasin homolog (yeast) [Source:MGI Symbol;Acc:MGI:1926159]	251	412	34.8312	42.149	0.275119
ENSMUST00000022894	ENSMUST00000022894	MGI:109484	Ywhaz	tyrosine 3-monooxygenase/tryptophan 5-monooxygenase activation protein, zeta polypeptide [Source:MGI Symbol;Acc:MGI:109484]	82	411	11.3791	42.0467	1.8856
ENSMUST00000067689	ENSMUST00000067689	MGI:2443730	Tnrc6b	trinucleotide repeat containing 6b [Source:MGI Symbol;Acc:MGI:2443730]	174	411	24.1459	42.0467	0.800213
ENSMUST00000140111	ENSMUST00000140111	MGI:1914283	2610005L07Rik	RIKEN cDNA 2610005L07 gene [Source:MGI Symbol;Acc:MGI:1914283]	187	411	25.9499	42.0467	0.696262
ENSMUST00000181951	ENSMUST00000181951		AC162449.1		468	411	64.9442	42.0467	-0.627209
ENSMUST00000047898	ENSMUST00000047898	MGI:1354736	Kdm2a	lysine (K)-specific demethylase 2A [Source:MGI Symbol;Acc:MGI:1354736]	127	410	17.6238	41.9444	1.25096
ENSMUST00000043765	ENSMUST00000043765	MGI:2443517	Hnrnpul1	heterogeneous nuclear ribonucleoprotein U-like 1 [Source:MGI Symbol;Acc:MGI:2443517]	195	410	27.0601	41.9444	0.632311
ENSMUST00000127826	ENSMUST00000127826	MGI:2148252	2610305D13Rik	RIKEN cDNA 2610305D13 gene [Source:MGI Symbol;Acc:MGI:2148252]	152	409	21.093	41.8421	0.988191
ENSMUST00000025631	ENSMUST00000025631	MGI:700012	Ostf1	osteoclast stimulating factor 1 [Source:MGI Symbol;Acc:MGI:700012]	346	409	48.0143	41.8421	-0.19851
ENSMUST00000048116	ENSMUST00000048116	MGI:88117	Slc7a1	solute carrier family 7 (cationic amino acid transporter, y+ system), member 1 [Source:MGI Symbol;Acc:MGI:88117]	155	408	21.5093	41.7398	0.956463
ENSMUST00000180666	ENSMUST00000180666		AL928605.1		194	408	26.9213	41.7398	0.632674
ENSMUST00000115672	ENSMUST00000115672	MGI:1197007	Birc3	baculoviral IAP repeat-containing 3 [Source:MGI Symbol;Acc:MGI:1197007]	212	408	29.4192	41.7398	0.504666
ENSMUST00000022663	ENSMUST00000022663	MGI:1341090	Tnfrsf10b	tumor necrosis factor receptor superfamily, member 10b [Source:MGI Symbol;Acc:MGI:1341090]	326	407	45.2389	41.6375	-0.119682
ENSMUST00000049040	ENSMUST00000049040	MGI:1924059	Bri3bp	Bri3 binding protein [Source:MGI Symbol;Acc:MGI:1924059]	178	406	24.701	41.5352	0.749764
ENSMUST00000140408	ENSMUST00000140408	MGI:1328366	Smarcb1	SWI/SNF related, matrix associated, actin dependent regulator of chromatin, subfamily b, member 1 [Source:MGI Symbol;Acc:MGI:1328366]	212	406	29.4192	41.5352	0.497577
ENSMUST00000118679	ENSMUST00000118679	MGI:1923620	Txndc11	thioredoxin domain containing 11 [Source:MGI Symbol;Acc:MGI:1923620]	177	405	24.5622	41.4329	0.754334
ENSMUST00000006470	ENSMUST00000006470	MGI:109565	Wbp7	WW domain binding protein 7 [Source:MGI Symbol;Acc:MGI:109565]	199	405	27.6152	41.4329	0.585315
ENSMUST00000178451	ENSMUST00000178451	MGI:5434447	Gm21092	predicted gene, 21092 [Source:MGI Symbol;Acc:MGI:5434447]	184	403	25.5336	41.2283	0.691236
ENSMUST00000027071	ENSMUST00000027071	MGI:2442551	Lactb2	lactamase, beta 2 [Source:MGI Symbol;Acc:MGI:2442551]	221	403	30.6681	41.2283	0.426895
ENSMUST00000038194	ENSMUST00000038194	MGI:1917722	Atad2	ATPase family, AAA domain containing 2 [Source:MGI Symbol;Acc:MGI:1917722]	188	402	26.0887	41.126	0.656624
ENSMUST00000053232	ENSMUST00000053232	MGI:1277098	Ptp4a3	protein tyrosine phosphatase 4a3 [Source:MGI Symbol;Acc:MGI:1277098]	227	402	31.5007	41.126	0.384665
ENSMUST00000139720	ENSMUST00000139720	MGI:1931144	Parva	parvin, alpha [Source:MGI Symbol;Acc:MGI:1931144]	308	401	42.7411	41.0237	-0.0591665
ENSMUST00000084563	ENSMUST00000084563	MGI:2444036	Srcap	Snf2-related CREBBP activator protein [Source:MGI Symbol;Acc:MGI:2444036]	159	399	22.0644	40.8191	0.887524
ENSMUST00000050561	ENSMUST00000050561	MGI:1921799	Mau2	MAU2 chromatid cohesion factor homolog (C. elegans) [Source:MGI Symbol;Acc:MGI:1921799]	204	399	28.309	40.8191	0.527981
ENSMUST00000142932	ENSMUST00000142932	MGI:1347355	Slc7a11	solute carrier family 7 (cationic amino acid transporter, y+ system), member 11 [Source:MGI Symbol;Acc:MGI:1347355]	280	397	38.8555	40.6145	0.0638738
ENSMUST00000087315	ENSMUST00000087315	MGI:90675	Vars	valyl-tRNA synthetase [Source:MGI Symbol;Acc:MGI:90675]	284	397	39.4106	40.6145	0.0434097
ENSMUST00000177669	ENSMUST00000177669	MGI:97549	Pfn1	profilin 1 [Source:MGI Symbol;Acc:MGI:97549]	156	396	21.6481	40.5122	0.904116
ENSMUST00000021142	ENSMUST00000021142	MGI:1194503	Atp2a3	ATPase, Ca++ transporting, ubiquitous [Source:MGI Symbol;Acc:MGI:1194503]	173	396	24.0072	40.5122	0.75489
ENSMUST00000058438	ENSMUST00000058438	MGI:1919083	Dcaf7	DDB1 and CUL4 associated factor 7 [Source:MGI Symbol;Acc:MGI:1919083]	76	395	10.5465	40.4099	1.93794
ENSMUST00000023100	ENSMUST00000023100	MGI:107585	Srebf2	sterol regulatory element binding factor 2 [Source:MGI Symbol;Acc:MGI:107585]	179	395	24.8398	40.4099	0.702055
ENSMUST00000150704	ENSMUST00000150704	MGI:2143698	Vezt	vezatin, adherens junctions transmembrane protein [Source:MGI Symbol;Acc:MGI:2143698]	224	394	31.0844	40.3075	0.374859
ENSMUST00000176093	ENSMUST00000176093	MGI:1928483	Stx5a	syntaxin 5A [Source:MGI Symbol;Acc:MGI:1928483]	221	393	30.6681	40.2052	0.390645
ENSMUST00000113485	ENSMUST00000113485	MGI:1095403	Sf1	splicing factor 1 [Source:MGI Symbol;Acc:MGI:1095403]	189	392	26.2275	40.1029	0.612629
ENSMUST00000025675	ENSMUST00000025675	MGI:1918249	Naa40	N(alpha)-acetyltransferase 40, NatD catalytic subunit, homolog (S. cerevisiae) [Source:MGI Symbol;Acc:MGI:1918249]	119	391	16.5136	40.0006	1.27637
ENSMUST00000057043	ENSMUST00000057043	MGI:1913776	Tceanc2	transcription elongation factor A (SII) N-terminal and central domain containing 2 [Source:MGI Symbol;Acc:MGI:1913776]	164	391	22.7582	40.0006	0.813634
ENSMUST00000060253	ENSMUST00000060253	MGI:1335089	Fem1a	feminization 1 homolog a (C. elegans) [Source:MGI Symbol;Acc:MGI:1335089]	221	388	30.6681	39.6937	0.372172
ENSMUST00000154732	ENSMUST00000154732	MGI:109589	Ocrl	oculocerebrorenal syndrome of Lowe [Source:MGI Symbol;Acc:MGI:109589]	238	388	33.0272	39.6937	0.265257
ENSMUST00000021957	ENSMUST00000021957	MGI:2385851	Fam193b	family with sequence similarity 193, member B [Source:MGI Symbol;Acc:MGI:2385851]	291	388	40.382	39.6937	-0.0248009
ENSMUST00000123998	ENSMUST00000123998	MGI:2443527	A830082K12Rik	RIKEN cDNA A830082K12 gene [Source:MGI Symbol;Acc:MGI:2443527]	322	388	44.6838	39.6937	-0.170842
ENSMUST00000155976	ENSMUST00000155976	MGI:3783059	Gm15614	predicted gene 15614 [Source:MGI Symbol;Acc:MGI:3783059]	218	385	30.2518	39.3868	0.380692
ENSMUST00000145916	ENSMUST00000145916	MGI:3705276	Gm15298	predicted gene 15298 [Source:MGI Symbol;Acc:MGI:3705276]	330	385	45.794	39.3868	-0.217446
ENSMUST00000027517	ENSMUST00000027517	MGI:2138334	Dgkd	diacylglycerol kinase, delta [Source:MGI Symbol;Acc:MGI:2138334]	138	384	19.1502	39.2845	1.0366
ENSMUST00000068726	ENSMUST00000068726	MGI:1342295	Celf1	CUGBP, Elav-like family member 1 [Source:MGI Symbol;Acc:MGI:1342295]	95	383	13.1831	39.1822	1.57151
ENSMUST00000140024	ENSMUST00000140024	MGI:88348	Cd9	CD9 antigen [Source:MGI Symbol;Acc:MGI:88348]	228	383	31.6395	39.1822	0.308472
ENSMUST00000030623	ENSMUST00000030623	MGI:1918764	Sfpq	splicing factor proline/glutamine rich (polypyrimidine tract binding protein associated) [Source:MGI Symbol;Acc:MGI:1918764]	259	381	35.9414	38.9776	0.117001
ENSMUST00000155551	ENSMUST00000155551	MGI:2140179	Dcaf10	DDB1 and CUL4 associated factor 10 [Source:MGI Symbol;Acc:MGI:2140179]	207	380	28.7253	38.8753	0.43653
ENSMUST00000182829	ENSMUST00000182829	MGI:1921456	Sipa1l3	signal-induced proliferation-associated 1 like 3 [Source:MGI Symbol;Acc:MGI:1921456]	225	380	31.2232	38.8753	0.316236
ENSMUST00000180843	ENSMUST00000180843	MGI:2443344	Ano4	anoctamin 4 [Source:MGI Symbol;Acc:MGI:2443344]	240	380	33.3047	38.8753	0.223127
ENSMUST00000167843	ENSMUST00000167843	MGI:3646076	Gm6802	predicted gene 6802 [Source:MGI Symbol;Acc:MGI:3646076]	267	380	37.0515	38.8753	0.0693213
ENSMUST00000077577	ENSMUST00000077577	MGI:107804	Tuba1b	tubulin, alpha 1B [Source:MGI Symbol;Acc:MGI:107804]	108	379	14.9871	38.773	1.37133
ENSMUST00000084241	ENSMUST00000084241	MGI:1098641	Wasf2	WAS protein family, member 2 [Source:MGI Symbol;Acc:MGI:1098641]	128	379	17.7625	38.773	1.12622
ENSMUST00000089622	ENSMUST00000089622	MGI:2446229	Tet3	tet methylcytosine dioxygenase 3 [Source:MGI Symbol;Acc:MGI:2446229]	201	379	27.8927	38.773	0.475164
ENSMUST00000030143	ENSMUST00000030143	MGI:1916176	Ubap2	ubiquitin-associated protein 2 [Source:MGI Symbol;Acc:MGI:1916176]	104	378	14.4321	38.6707	1.42196
ENSMUST00000084238	ENSMUST00000084238	MGI:3527792	Zdhhc18	zinc finger, DHHC domain containing 18 [Source:MGI Symbol;Acc:MGI:3527792]	112	378	15.5422	38.6707	1.31505
ENSMUST00000052529	ENSMUST00000052529	MGI:2444211	Ppp1r15b	protein phosphatase 1, regulatory (inhibitor) subunit 15b [Source:MGI Symbol;Acc:MGI:2444211]	184	377	25.5336	38.5684	0.59502
ENSMUST00000180842	ENSMUST00000180842		CT010433.2		198	377	27.4764	38.5684	0.489226
ENSMUST00000181529	ENSMUST00000181529		AC167978.1		202	377	28.0315	38.5684	0.460371
ENSMUST00000125966	ENSMUST00000125966	MGI:1919804	Utp14a	UTP14, U3 small nucleolar ribonucleoprotein, homolog A (yeast) [Source:MGI Symbol;Acc:MGI:1919804]	221	377	30.6681	38.5684	0.33068
ENSMUST00000038696	ENSMUST00000038696	MGI:2387581	Ppp1r9b	protein phosphatase 1, regulatory subunit 9B [Source:MGI Symbol;Acc:MGI:2387581]	143	374	19.8441	38.2615	0.947185
ENSMUST00000047973	ENSMUST00000047973	MGI:1922004	Dhcr24	24-dehydrocholesterol reductase [Source:MGI Symbol;Acc:MGI:1922004]	145	374	20.1216	38.2615	0.927147
ENSMUST00000014218	ENSMUST00000014218	MGI:1917488	Rnf168	ring finger protein 168 [Source:MGI Symbol;Acc:MGI:1917488]	199	374	27.6152	38.2615	0.470431
ENSMUST00000078755	ENSMUST00000078755	MGI:1346338	Xcr1	chemokine (C motif) receptor 1 [Source:MGI Symbol;Acc:MGI:1346338]	208	374	28.8641	38.2615	0.406616
ENSMUST00000070124	ENSMUST00000070124	MGI:2448457	Hist1h2ai	histone cluster 1, H2ai [Source:MGI Symbol;Acc:MGI:2448457]	227	374	31.5007	38.2615	0.280508
ENSMUST00000025786	ENSMUST00000025786	MGI:1277113	Pacs1	phosphofurin acidic cluster sorting protein 1 [Source:MGI Symbol;Acc:MGI:1277113]	86	372	11.9342	38.0569	1.67306
ENSMUST00000003433	ENSMUST00000003433	MGI:894279	Mknk2	MAP kinase-interacting serine/threonine kinase 2 [Source:MGI Symbol;Acc:MGI:894279]	98	372	13.5994	38.0569	1.48461
ENSMUST00000148952	ENSMUST00000148952	MGI:2444855	Klhl20	kelch-like 20 [Source:MGI Symbol;Acc:MGI:2444855]	233	372	32.3333	38.0569	0.235134
ENSMUST00000175840	ENSMUST00000175840	MGI:1919735	Ccdc141	coiled-coil domain containing 141 [Source:MGI Symbol;Acc:MGI:1919735]	285	372	39.5494	38.0569	-0.0554977
ENSMUST00000081435	ENSMUST00000081435	MGI:95933	H2-Q4	histocompatibility 2, Q region locus 4 [Source:MGI Symbol;Acc:MGI:95933]	329	372	45.6552	38.0569	-0.262623
ENSMUST00000042614	ENSMUST00000042614	MGI:3647820	Gm15800	predicted gene 15800 [Source:MGI Symbol;Acc:MGI:3647820]	244	371	33.8598	37.9546	0.1647
ENSMUST00000113398	ENSMUST00000113398	MGI:99654	Epha5	Eph receptor A5 [Source:MGI Symbol;Acc:MGI:99654]	423	371	58.6996	37.9546	-0.629077
ENSMUST00000082337	ENSMUST00000082337	MGI:3525201	Mdc1	mediator of DNA damage checkpoint 1 [Source:MGI Symbol;Acc:MGI:3525201]	210	370	29.1416	37.8523	0.377298
ENSMUST00000127884	ENSMUST00000127884	MGI:1924290	Atg16l1	autophagy related 16-like 1 (S. cerevisiae) [Source:MGI Symbol;Acc:MGI:1924290]	288	370	39.9657	37.8523	-0.0783819
ENSMUST00000156725	ENSMUST00000156725	MGI:2444450	Fbxl18	F-box and leucine-rich repeat protein 18 [Source:MGI Symbol;Acc:MGI:2444450]	196	369	27.1989	37.75	0.472929
ENSMUST00000021273	ENSMUST00000021273	MGI:1313277	Vamp2	vesicle-associated membrane protein 2 [Source:MGI Symbol;Acc:MGI:1313277]	71	368	9.85265	37.6477	1.93398
ENSMUST00000088452	ENSMUST00000088452	MGI:2145895	Slc38a1	solute carrier family 38, member 1 [Source:MGI Symbol;Acc:MGI:2145895]	136	368	18.8727	37.6477	0.996261
ENSMUST00000026297	ENSMUST00000026297	MGI:2448557	Gnl3l	guanine nucleotide binding protein-like 3 (nucleolar)-like [Source:MGI Symbol;Acc:MGI:2448557]	183	368	25.3949	37.6477	0.568024
ENSMUST00000049404	ENSMUST00000049404	MGI:1923957	Clasp1	CLIP associating protein 1 [Source:MGI Symbol;Acc:MGI:1923957]	363	367	50.3734	37.5454	-0.424028
ENSMUST00000107796	ENSMUST00000107796	MGI:2684984	Slc25a51	solute carrier family 25, member 51 [Source:MGI Symbol;Acc:MGI:2684984]	194	366	26.9213	37.4431	0.475949
ENSMUST00000166408	ENSMUST00000166408	MGI:1098577	Mettl17	methyltransferase like 17 [Source:MGI Symbol;Acc:MGI:1098577]	223	366	30.9456	37.4431	0.274962
ENSMUST00000032179	ENSMUST00000032179	MGI:1859555	Nup210	nucleoporin 210 [Source:MGI Symbol;Acc:MGI:1859555]	184	365	25.5336	37.3407	0.548352
ENSMUST00000001479	ENSMUST00000001479	MGI:107532	Kpnb1	karyopherin (importin) beta 1 [Source:MGI Symbol;Acc:MGI:107532]	188	365	26.0887	37.3407	0.517325
ENSMUST00000174857	ENSMUST00000174857	MGI:1289147	E2f7	E2F transcription factor 7 [Source:MGI Symbol;Acc:MGI:1289147]	227	365	31.5007	37.3407	0.245366
ENSMUST00000041558	ENSMUST00000041558	MGI:1276124	Ep400	E1A binding protein p400 [Source:MGI Symbol;Acc:MGI:1276124]	268	365	37.1903	37.3407	0.00582507
ENSMUST00000044250	ENSMUST00000044250	MGI:2144489	Alkbh5	alkB, alkylation repair homolog 5 (E. coli) [Source:MGI Symbol;Acc:MGI:2144489]	88	364	12.2117	37.2384	1.60852
ENSMUST00000071555	ENSMUST00000071555	MGI:87906	Actg1	actin, gamma, cytoplasmic 1 [Source:MGI Symbol;Acc:MGI:87906]	115	364	15.9585	37.2384	1.22247
ENSMUST00000174479	ENSMUST00000174479	MGI:1203728	Dtnb	dystrobrevin, beta [Source:MGI Symbol;Acc:MGI:1203728]	244	364	33.8598	37.2384	0.137219
ENSMUST00000154467	ENSMUST00000154467	MGI:107760	Chka	choline kinase alpha [Source:MGI Symbol;Acc:MGI:107760]	185	362	25.6724	37.0338	0.528626
ENSMUST00000003912	ENSMUST00000003912	MGI:88252	Calr	calreticulin [Source:MGI Symbol;Acc:MGI:88252]	137	361	19.0115	36.9315	0.957985
ENSMUST00000024739	ENSMUST00000024739	MGI:96247	Hsp90ab1	heat shock protein 90 alpha (cytosolic), class B member 1 [Source:MGI Symbol;Acc:MGI:96247]	221	361	30.6681	36.9315	0.268114
ENSMUST00000043526	ENSMUST00000043526	MGI:1921506	Cyld	cylindromatosis (turban tumor syndrome) [Source:MGI Symbol;Acc:MGI:1921506]	194	360	26.9213	36.8292	0.452102
ENSMUST00000040069	ENSMUST00000040069	MGI:2152907	Colec12	collectin sub-family member 12 [Source:MGI Symbol;Acc:MGI:2152907]	213	360	29.558	36.8292	0.317305
ENSMUST00000068448	ENSMUST00000068448	MGI:3642605	Gm9964	predicted gene 9964 [Source:MGI Symbol;Acc:MGI:3642605]	222	360	30.8069	36.8292	0.257599
ENSMUST00000054960	ENSMUST00000054960	MGI:2443921	Irf2bp2	interferon regulatory factor 2 binding protein 2 [Source:MGI Symbol;Acc:MGI:2443921]	135	359	18.7339	36.7269	0.971186
ENSMUST00000105378	ENSMUST00000105378	MGI:2158394	Med16	mediator complex subunit 16 [Source:MGI Symbol;Acc:MGI:2158394]	199	359	27.6152	36.7269	0.411377
ENSMUST00000150084	ENSMUST00000150084	MGI:3840129	Gm16344	predicted gene 16344 [Source:MGI Symbol;Acc:MGI:3840129]	255	359	35.3863	36.7269	0.0536482
ENSMUST00000110766	ENSMUST00000110766	MGI:2444450	Fbxl18	F-box and leucine-rich repeat protein 18 [Source:MGI Symbol;Acc:MGI:2444450]	192	358	26.6438	36.6246	0.459015
ENSMUST00000120129	ENSMUST00000120129	MGI:2443658	Prr14l	proline rich 14-like [Source:MGI Symbol;Acc:MGI:2443658]	193	358	26.7826	36.6246	0.45152
ENSMUST00000049449	ENSMUST00000049449	MGI:2156893	Ptpn7	protein tyrosine phosphatase, non-receptor type 7 [Source:MGI Symbol;Acc:MGI:2156893]	203	358	28.1703	36.6246	0.378641
ENSMUST00000093852	ENSMUST00000093852	MGI:103222	Zbtb16	zinc finger and BTB domain containing 16 [Source:MGI Symbol;Acc:MGI:103222]	107	357	14.8484	36.5223	1.29847
ENSMUST00000043214	ENSMUST00000043214	MGI:97846	Rac2	RAS-related C3 botulinum substrate 2 [Source:MGI Symbol;Acc:MGI:97846]	155	357	21.5093	36.5223	0.763817
ENSMUST00000121299	ENSMUST00000121299	MGI:2136991	Mdm4-ps	transformed mouse 3T3 cell double minute 4, pseudogene [Source:MGI Symbol;Acc:MGI:2136991]	195	357	27.0601	36.5223	0.432612
ENSMUST00000002837	ENSMUST00000002837	MGI:1921586	Tmed5	transmembrane emp24 protein transport domain containing 5 [Source:MGI Symbol;Acc:MGI:1921586]	198	356	27.4764	36.42	0.406538
ENSMUST00000034863	ENSMUST00000034863	MGI:88537	Csk	c-src tyrosine kinase [Source:MGI Symbol;Acc:MGI:88537]	134	355	18.5951	36.3177	0.965748
ENSMUST00000061350	ENSMUST00000061350	MGI:2685387	Atp13a3	ATPase type 13A3 [Source:MGI Symbol;Acc:MGI:2685387]	210	355	29.1416	36.3177	0.317591
ENSMUST00000092966	ENSMUST00000092966	MGI:3807476	Dynlt1c	dynein light chain Tctex-type 1C [Source:MGI Symbol;Acc:MGI:3807476]	234	355	32.4721	36.3177	0.161472
ENSMUST00000025746	ENSMUST00000025746	MGI:109529	Dpf2	D4, zinc and double PHD fingers family 2 [Source:MGI Symbol;Acc:MGI:109529]	70	354	9.71388	36.2154	1.89848
ENSMUST00000078259	ENSMUST00000078259	MGI:2685830	Nsl1	NSL1, MIND kinetochore complex component, homolog (S. cerevisiae) [Source:MGI Symbol;Acc:MGI:2685830]	198	354	27.4764	36.2154	0.398411
ENSMUST00000052686	ENSMUST00000052686	MGI:102688	H2afx	H2A histone family, member X [Source:MGI Symbol;Acc:MGI:102688]	159	353	22.0644	36.1131	0.710803
ENSMUST00000107886	ENSMUST00000107886	MGI:1915956	Rgp1	RGP1 retrograde golgi transport homolog (S. cerevisiae) [Source:MGI Symbol;Acc:MGI:1915956]	65	352	9.02003	36.0108	1.99723
ENSMUST00000121393	ENSMUST00000121393	MGI:3782813	Gm4631	predicted gene 4631 [Source:MGI Symbol;Acc:MGI:3782813]	263	352	36.4964	36.0108	-0.0193258
ENSMUST00000093381	ENSMUST00000093381	MGI:3041210	Ccdc157	coiled-coil domain containing 157 [Source:MGI Symbol;Acc:MGI:3041210]	156	351	21.6481	35.9085	0.730087
ENSMUST00000097535	ENSMUST00000097535	MGI:3761270	E330020D12Rik	Riken cDNA E330020D12 gene [Source:MGI Symbol;Acc:MGI:3761270]	240	351	33.3047	35.9085	0.108598
ENSMUST00000042125	ENSMUST00000042125	MGI:1914784	Ttll4	tubulin tyrosine ligase-like family, member 4 [Source:MGI Symbol;Acc:MGI:1914784]	200	350	27.7539	35.8062	0.367517
ENSMUST00000115576	ENSMUST00000115576	MGI:1913893	Lix1	limb expression 1 homolog (chicken) [Source:MGI Symbol;Acc:MGI:1913893]	202	350	28.0315	35.8062	0.353161
ENSMUST00000037011	ENSMUST00000037011	MGI:106264	Trim36	tripartite motif-containing 36 [Source:MGI Symbol;Acc:MGI:106264]	207	350	28.7253	35.8062	0.317886
ENSMUST00000004770	ENSMUST00000004770	MGI:98880	Tyr	tyrosinase [Source:MGI Symbol;Acc:MGI:98880]	220	350	30.5293	35.8062	0.230013
ENSMUST00000125797	ENSMUST00000125797	MGI:1922022	Atp13a2	ATPase type 13A2 [Source:MGI Symbol;Acc:MGI:1922022]	224	349	31.0844	35.7039	0.19989
ENSMUST00000137603	ENSMUST00000137603	MGI:1922334	4930511M06Rik	RIKEN cDNA 4930511M06 gene [Source:MGI Symbol;Acc:MGI:1922334]	309	349	42.8798	35.7039	-0.264218
ENSMUST00000137271	ENSMUST00000137271	MGI:1914450	Ccdc77	coiled-coil domain containing 77 [Source:MGI Symbol;Acc:MGI:1914450]	204	348	28.309	35.6016	0.33068
ENSMUST00000181206	ENSMUST00000181206		AC087541.1		140	347	19.4278	35.4993	0.86967
ENSMUST00000153748	ENSMUST00000153748	MGI:3694236	6820431F20Rik	RIKEN cDNA 6820431F20 gene [Source:MGI Symbol;Acc:MGI:3694236]	156	347	21.6481	35.4993	0.713551
ENSMUST00000008036	ENSMUST00000008036	MGI:1927099	Rplp1	ribosomal protein, large, P1 [Source:MGI Symbol;Acc:MGI:1927099]	232	347	32.1946	35.4993	0.140972
ENSMUST00000082402	ENSMUST00000082402	MGI:102504	mt-Co1	mitochondrially encoded cytochrome c oxidase I [Source:MGI Symbol;Acc:MGI:102504]	191	346	26.505	35.397	0.417361
ENSMUST00000177643	ENSMUST00000177643	MGI:5455667	Gm25890	predicted gene, 25890 [Source:MGI Symbol;Acc:MGI:5455667]	194	346	26.9213	35.397	0.394877
ENSMUST00000113796	ENSMUST00000113796	MGI:1916910	Tmbim1	transmembrane BAX inhibitor motif containing 1 [Source:MGI Symbol;Acc:MGI:1916910]	208	346	28.8641	35.397	0.29435
ENSMUST00000170135	ENSMUST00000170135	MGI:2137218	Mrpl13	mitochondrial ribosomal protein L13 [Source:MGI Symbol;Acc:MGI:2137218]	211	346	29.2804	35.397	0.273691
ENSMUST00000094434	ENSMUST00000094434	MGI:95589	Ftl1	ferritin light chain 1 [Source:MGI Symbol;Acc:MGI:95589]	195	345	27.0601	35.2947	0.383284
ENSMUST00000161779	ENSMUST00000161779	MGI:1314872	Hipk2	homeodomain interacting protein kinase 2 [Source:MGI Symbol;Acc:MGI:1314872]	87	344	12.073	35.1924	1.54348
ENSMUST00000153341	ENSMUST00000153341	MGI:3612471	C330021F23Rik	RIKEN cDNA C330021F23 gene [Source:MGI Symbol;Acc:MGI:3612471]	204	344	28.309	35.1924	0.314001
ENSMUST00000002683	ENSMUST00000002683	MGI:1196455	Ccdc97	coiled-coil domain containing 97 [Source:MGI Symbol;Acc:MGI:1196455]	114	343	15.8197	35.0901	1.14934
ENSMUST00000105608	ENSMUST00000105608	MGI:2444240	Slc35e2	solute carrier family 35, member E2 [Source:MGI Symbol;Acc:MGI:2444240]	168	343	23.3133	35.0901	0.589909
ENSMUST00000002825	ENSMUST00000002825	MGI:1353499	Baz1b	bromodomain adjacent to zinc finger domain, 1B [Source:MGI Symbol;Acc:MGI:1353499]	205	343	28.4478	35.0901	0.302746
ENSMUST00000172641	ENSMUST00000172641	MGI:1916327	Psmd11	proteasome (prosome, macropain) 26S subunit, non-ATPase, 11 [Source:MGI Symbol;Acc:MGI:1916327]	169	342	23.4521	34.9878	0.577135
ENSMUST00000053177	ENSMUST00000053177	MGI:1096875	Wdfy3	WD repeat and FYVE domain containing 3 [Source:MGI Symbol;Acc:MGI:1096875]	191	342	26.505	34.9878	0.400585
ENSMUST00000033611	ENSMUST00000033611	MGI:3584011	Xkrx	X Kell blood group precursor related X linked [Source:MGI Symbol;Acc:MGI:3584011]	50	341	6.93849	34.8855	2.32993
ENSMUST00000021864	ENSMUST00000021864	MGI:105082	Ssr1	signal sequence receptor, alpha [Source:MGI Symbol;Acc:MGI:105082]	93	341	12.9056	34.8855	1.43463
ENSMUST00000169681	ENSMUST00000169681	MGI:95304	Eif4b	eukaryotic translation initiation factor 4B [Source:MGI Symbol;Acc:MGI:95304]	150	341	20.8155	34.8855	0.744971
ENSMUST00000117394	ENSMUST00000117394	MGI:1915919	Taok2	TAO kinase 2 [Source:MGI Symbol;Acc:MGI:1915919]	69	340	9.57511	34.7832	1.86103
ENSMUST00000060805	ENSMUST00000060805	MGI:2446163	Fam120a	family with sequence similarity 120, member A [Source:MGI Symbol;Acc:MGI:2446163]	249	340	34.5537	34.7832	0.00955062
ENSMUST00000150694	ENSMUST00000150694	MGI:3651187	Gm12018	predicted gene 12018 [Source:MGI Symbol;Acc:MGI:3651187]	323	340	44.8226	34.7832	-0.365838
ENSMUST00000060645	ENSMUST00000060645	MGI:1913839	Ube2v1	ubiquitin-conjugating enzyme E2 variant 1 [Source:MGI Symbol;Acc:MGI:1913839]	57	339	7.90987	34.6809	2.13241
ENSMUST00000042889	ENSMUST00000042889	MGI:1920145	Setd5	SET domain containing 5 [Source:MGI Symbol;Acc:MGI:1920145]	176	339	24.4235	34.6809	0.505871
ENSMUST00000037913	ENSMUST00000037913	MGI:2685383	Rmi2	RMI2, RecQ mediated genome instability 2, homolog (S. cerevisiae) [Source:MGI Symbol;Acc:MGI:2685383]	199	339	27.6152	34.6809	0.328678
ENSMUST00000157343	ENSMUST00000157343	MGI:5455172	Gm25395	predicted gene, 25395 [Source:MGI Symbol;Acc:MGI:5455172]	58	338	8.04864	34.5786	2.10306
ENSMUST00000108987	ENSMUST00000108987	MGI:894310	Sept8	septin 8 [Source:MGI Symbol;Acc:MGI:894310]	117	336	16.2361	34.374	1.08211
ENSMUST00000106545	ENSMUST00000106545	MGI:1932403	Cyp4x1	cytochrome P450, family 4, subfamily x, polypeptide 1 [Source:MGI Symbol;Acc:MGI:1932403]	220	336	30.5293	34.374	0.171119
ENSMUST00000060711	ENSMUST00000060711	MGI:1925031	Epm2aip1	EPM2A (laforin) interacting protein 1 [Source:MGI Symbol;Acc:MGI:1925031]	125	334	17.3462	34.1693	0.978082
ENSMUST00000015800	ENSMUST00000015800	MGI:105384	Hspa8	heat shock protein 8 [Source:MGI Symbol;Acc:MGI:105384]	178	334	24.701	34.1693	0.468132
ENSMUST00000157150	ENSMUST00000157150	MGI:105104	Rprl2	ribonuclease P RNA-like 2 [Source:MGI Symbol;Acc:MGI:105104]	197	334	27.3376	34.1693	0.321814
ENSMUST00000018727	ENSMUST00000018727	MGI:1351465	G3bp1	GTPase activating protein (SH3 domain) binding protein 1 [Source:MGI Symbol;Acc:MGI:1351465]	180	332	24.9785	33.9647	0.443348
ENSMUST00000037853	ENSMUST00000037853	MGI:1923765	Kdelc2	KDEL (Lys-Asp-Glu-Leu) containing 2 [Source:MGI Symbol;Acc:MGI:1923765]	226	331	31.362	33.8624	0.11067
ENSMUST00000155691	ENSMUST00000155691	MGI:1918323	4933421O10Rik	RIKEN cDNA 4933421O10 gene [Source:MGI Symbol;Acc:MGI:1918323]	272	330	37.7454	33.7601	-0.160979
ENSMUST00000021201	ENSMUST00000021201	MGI:107265	Cpd	carboxypeptidase D [Source:MGI Symbol;Acc:MGI:107265]	281	328	38.9943	33.5555	-0.216713
ENSMUST00000084125	ENSMUST00000084125	MGI:2387629	Tardbp	TAR DNA binding protein [Source:MGI Symbol;Acc:MGI:2387629]	136	327	18.8727	33.4532	0.825846
ENSMUST00000103086	ENSMUST00000103086	MGI:96601	Itga2b	integrin alpha 2b [Source:MGI Symbol;Acc:MGI:96601]	225	327	31.2232	33.4532	0.0995272
ENSMUST00000170489	ENSMUST00000170489	MGI:104976	Ddx6	DEAD (Asp-Glu-Ala-Asp) box polypeptide 6 [Source:MGI Symbol;Acc:MGI:104976]	97	326	13.4607	33.3509	1.30898
ENSMUST00000037141	ENSMUST00000037141	MGI:1920501	Setd7	SET domain containing (lysine methyltransferase) 7 [Source:MGI Symbol;Acc:MGI:1920501]	122	326	16.9299	33.3509	0.978152
ENSMUST00000055256	ENSMUST00000055256	MGI:1337080	Ncor2	nuclear receptor co-repressor 2 [Source:MGI Symbol;Acc:MGI:1337080]	172	326	23.8684	33.3509	0.482625
ENSMUST00000149359	ENSMUST00000149359	MGI:3050795	Mkl2	MKL/myocardin-like 2 [Source:MGI Symbol;Acc:MGI:3050795]	184	326	25.5336	33.3509	0.385328
ENSMUST00000101029	ENSMUST00000101029	MGI:1917685	Inf2	inverted formin, FH2 and WH2 domain containing [Source:MGI Symbol;Acc:MGI:1917685]	90	325	12.4893	33.2486	1.4126
ENSMUST00000055241	ENSMUST00000055241	MGI:1270153	Zfp106	zinc finger protein 106 [Source:MGI Symbol;Acc:MGI:1270153]	184	325	25.5336	33.2486	0.380896
ENSMUST00000111230	ENSMUST00000111230	MGI:1312985	Tagln2	transgelin 2 [Source:MGI Symbol;Acc:MGI:1312985]	93	324	12.9056	33.1463	1.36085
ENSMUST00000111072	ENSMUST00000111072	MGI:105988	Adam28	a disintegrin and metallopeptidase domain 28 [Source:MGI Symbol;Acc:MGI:105988]	153	324	21.2318	33.1463	0.642624
ENSMUST00000098901	ENSMUST00000098901	MGI:3694236	6820431F20Rik	RIKEN cDNA 6820431F20 gene [Source:MGI Symbol;Acc:MGI:3694236]	176	324	24.4235	33.1463	0.44058
ENSMUST00000056053	ENSMUST00000056053	MGI:2652820	Setd1b	SET domain containing 1B [Source:MGI Symbol;Acc:MGI:2652820]	137	323	19.0115	33.044	0.79752
ENSMUST00000044455	ENSMUST00000044455	MGI:2137896	Zfp451	zinc finger protein 451 [Source:MGI Symbol;Acc:MGI:2137896]	143	323	19.8441	33.044	0.735681
ENSMUST00000004990	ENSMUST00000004990	MGI:1346865	Mapk14	mitogen-activated protein kinase 14 [Source:MGI Symbol;Acc:MGI:1346865]	83	322	11.5179	32.9417	1.51604
ENSMUST00000061772	ENSMUST00000061772	MGI:2443205	Rbm15	RNA binding motif protein 15 [Source:MGI Symbol;Acc:MGI:2443205]	155	322	21.5093	32.9417	0.614954
ENSMUST00000024543	ENSMUST00000024543	MGI:2135679	Hes7	hairy and enhancer of split 7 (Drosophila) [Source:MGI Symbol;Acc:MGI:2135679]	392	322	54.3977	32.9417	-0.723631
ENSMUST00000039939	ENSMUST00000039939	MGI:1098672	Szrd1	SUZ RNA binding domain containing 1 [Source:MGI Symbol;Acc:MGI:1098672]	75	321	10.4077	32.8394	1.65777
ENSMUST00000093820	ENSMUST00000093820	MGI:2442675	Rfx7	regulatory factor X, 7 [Source:MGI Symbol;Acc:MGI:2442675]	207	321	28.7253	32.8394	0.193104
ENSMUST00000158917	ENSMUST00000158917	MGI:5455612	Gm25835	predicted gene, 25835 [Source:MGI Symbol;Acc:MGI:5455612]	168	320	23.3133	32.7371	0.489772
ENSMUST00000099274	ENSMUST00000099274	MGI:2677270	Pdzd8	PDZ domain containing 8 [Source:MGI Symbol;Acc:MGI:2677270]	171	320	23.7296	32.7371	0.464237
ENSMUST00000108336	ENSMUST00000108336	MGI:99207	Zfp60	zinc finger protein 60 [Source:MGI Symbol;Acc:MGI:99207]	161	319	22.3419	32.6348	0.546657
ENSMUST00000054384	ENSMUST00000054384	MGI:2685298	Trim56	tripartite motif-containing 56 [Source:MGI Symbol;Acc:MGI:2685298]	184	319	25.5336	32.6348	0.354012
ENSMUST00000181223	ENSMUST00000181223		RP24		240	319	33.3047	32.6348	-0.0293164
ENSMUST00000073234	ENSMUST00000073234	MGI:3036270	Atxn7l3	ataxin 7-like 3 [Source:MGI Symbol;Acc:MGI:3036270]	78	318	10.824	32.5325	1.58764
ENSMUST00000181020	ENSMUST00000181020	MGI:2180008	Jpx	Jpx transcript, Xist activator (non-protein coding) [Source:MGI Symbol;Acc:MGI:2180008]	185	318	25.6724	32.5325	0.341663
ENSMUST00000158050	ENSMUST00000158050	MGI:105105	Rprl1	ribonuclease P RNA-like 1 [Source:MGI Symbol;Acc:MGI:105105]	159	317	22.0644	32.4302	0.555618
ENSMUST00000050406	ENSMUST00000050406	MGI:107815	Pfkfb2	6-phosphofructo-2-kinase/fructose-2,6-biphosphatase 2 [Source:MGI Symbol;Acc:MGI:107815]	367	317	50.9285	32.4302	-0.651136
ENSMUST00000128645	ENSMUST00000128645	MGI:1344372	Rbck1	RanBP-type and C3HC4-type zinc finger containing 1 [Source:MGI Symbol;Acc:MGI:1344372]	53	316	7.3548	32.3279	2.13602
ENSMUST00000084852	ENSMUST00000084852	MGI:2443665	Numa1	nuclear mitotic apparatus protein 1 [Source:MGI Symbol;Acc:MGI:2443665]	158	316	21.9256	32.3279	0.560162
ENSMUST00000183113	ENSMUST00000183113	MGI:1289325	Anapc16	anaphase promoting complex subunit 16 [Source:MGI Symbol;Acc:MGI:1289325]	196	316	27.1989	32.3279	0.249233
ENSMUST00000158992	ENSMUST00000158992	MGI:3819482	Scarna10	small Cajal body-specific RNA 10 [Source:MGI Symbol;Acc:MGI:3819482]	93	315	12.9056	32.2256	1.32021
ENSMUST00000034278	ENSMUST00000034278	MGI:1921019	Gins2	GINS complex subunit 2 (Psf2 homolog) [Source:MGI Symbol;Acc:MGI:1921019]	92	314	12.7668	32.1233	1.33122
ENSMUST00000177831	ENSMUST00000177831	MGI:5434081	Gm21917	predicted gene, 21917 [Source:MGI Symbol;Acc:MGI:5434081]	165	314	22.897	32.1233	0.48846
ENSMUST00000160937	ENSMUST00000160937	MGI:101927	Dlx6	distal-less homeobox 6 [Source:MGI Symbol;Acc:MGI:101927]	307	314	42.6023	32.1233	-0.407312
ENSMUST00000176225	ENSMUST00000176225	MGI:101937	Pkib	protein kinase inhibitor beta, cAMP dependent, testis specific [Source:MGI Symbol;Acc:MGI:101937]	379	314	52.5937	32.1233	-0.711272
ENSMUST00000173788	ENSMUST00000173788	MGI:95936	H2-Q7	histocompatibility 2, Q region locus 7 [Source:MGI Symbol;Acc:MGI:95936]	403	314	55.9242	32.1233	-0.799854
ENSMUST00000056328	ENSMUST00000056328	MGI:2388131	Rnf26	ring finger protein 26 [Source:MGI Symbol;Acc:MGI:2388131]	85	313	11.7954	32.021	1.44079
ENSMUST00000159109	ENSMUST00000159109	MGI:2674092	Zfp609	zinc finger protein 609 [Source:MGI Symbol;Acc:MGI:2674092]	102	313	14.1545	32.021	1.17776
ENSMUST00000030992	ENSMUST00000030992	MGI:1201691	Rnf4	ring finger protein 4 [Source:MGI Symbol;Acc:MGI:1201691]	121	313	16.7911	32.021	0.931317
ENSMUST00000028667	ENSMUST00000028667	MGI:1278339	Dgkz	diacylglycerol kinase zeta [Source:MGI Symbol;Acc:MGI:1278339]	183	313	25.3949	32.021	0.334481
ENSMUST00000178724	ENSMUST00000178724	MGI:2444706	Mdga2	MAM domain containing glycosylphosphatidylinositol anchor 2 [Source:MGI Symbol;Acc:MGI:2444706]	279	313	38.7168	32.021	-0.273941
ENSMUST00000158656	ENSMUST00000158656	MGI:3819487	Scarna6	small Cajal body-specific RNA 6 [Source:MGI Symbol;Acc:MGI:3819487]	40	312	5.55079	31.9187	2.52364
ENSMUST00000181486	ENSMUST00000181486		AL731663.1		119	312	16.5136	31.9187	0.950746
ENSMUST00000111493	ENSMUST00000111493	MGI:104574	Ptprj	protein tyrosine phosphatase, receptor type, J [Source:MGI Symbol;Acc:MGI:104574]	128	312	17.7625	31.9187	0.845564
ENSMUST00000037232	ENSMUST00000037232	MGI:2443664	Rreb1	ras responsive element binding protein 1 [Source:MGI Symbol;Acc:MGI:2443664]	154	312	21.3705	31.9187	0.578777
ENSMUST00000181489	ENSMUST00000181489		AC102484.1		183	312	25.3949	31.9187	0.329864
ENSMUST00000132697	ENSMUST00000132697	MGI:1333857	Arhgap31	Rho GTPase activating protein 31 [Source:MGI Symbol;Acc:MGI:1333857]	223	312	30.9456	31.9187	0.0446639
ENSMUST00000034713	ENSMUST00000034713	MGI:96765	Ldlr	low density lipoprotein receptor [Source:MGI Symbol;Acc:MGI:96765]	161	311	22.3419	31.8164	0.510016
ENSMUST00000098873	ENSMUST00000098873	MGI:95612	Gabpb2	GA repeat binding protein, beta 2 [Source:MGI Symbol;Acc:MGI:95612]	175	311	24.2847	31.8164	0.389721
ENSMUST00000049295	ENSMUST00000049295	MGI:3612340	Ehbp1l1	EH domain binding protein 1-like 1 [Source:MGI Symbol;Acc:MGI:3612340]	197	311	27.3376	31.8164	0.218881
ENSMUST00000045897	ENSMUST00000045897	MGI:97803	Ptma	prothymosin alpha [Source:MGI Symbol;Acc:MGI:97803]	207	311	28.7253	31.8164	0.147445
ENSMUST00000046463	ENSMUST00000046463	MGI:109443	Gtpbp1	GTP binding protein 1 [Source:MGI Symbol;Acc:MGI:109443]	54	310	7.49356	31.7141	2.0814
ENSMUST00000145013	ENSMUST00000145013	MGI:2442119	Papolg	poly(A) polymerase gamma [Source:MGI Symbol;Acc:MGI:2442119]	230	310	31.917	31.7141	-0.00920403
ENSMUST00000155774	ENSMUST00000155774	MGI:1924827	Spns3	spinster homolog 3 [Source:MGI Symbol;Acc:MGI:1924827]	95	309	13.1831	31.6118	1.26177
ENSMUST00000045621	ENSMUST00000045621	MGI:2151152	Baz2a	bromodomain adjacent to zinc finger domain, 2A [Source:MGI Symbol;Acc:MGI:2151152]	137	309	19.0115	31.6118	0.733593
ENSMUST00000156431	ENSMUST00000156431	MGI:1929657	Hacl1	2-hydroxyacyl-CoA lyase 1 [Source:MGI Symbol;Acc:MGI:1929657]	154	309	21.3705	31.6118	0.564838
ENSMUST00000094805	ENSMUST00000094805	MGI:3612184	Ccdc8	coiled-coil domain containing 8 [Source:MGI Symbol;Acc:MGI:3612184]	171	309	23.7296	31.6118	0.413772
ENSMUST00000109262	ENSMUST00000109262	MGI:1918025	Zmynd8	zinc finger, MYND-type containing 8 [Source:MGI Symbol;Acc:MGI:1918025]	194	309	26.9213	31.6118	0.231712
ENSMUST00000042824	ENSMUST00000042824	MGI:2384589	Herc1	hect (homologous to the E6-AP (UBE3A) carboxyl terminus) domain and RCC1 (CHC1)-like domain (RLD) 1 [Source:MGI Symbol;Acc:MGI:2384589]	204	309	28.309	31.6118	0.159199
ENSMUST00000084715	ENSMUST00000084715	MGI:107277	Fyco1	FYVE and coiled-coil domain containing 1 [Source:MGI Symbol;Acc:MGI:107277]	475	308	65.9156	31.5095	-1.06484
ENSMUST00000017799	ENSMUST00000017799	MGI:88336	Cd40	CD40 antigen [Source:MGI Symbol;Acc:MGI:88336]	174	307	24.1459	31.4072	0.379313
ENSMUST00000068169	ENSMUST00000068169	MGI:1861733	Pcnxl3	pecanex-like 3 (Drosophila) [Source:MGI Symbol;Acc:MGI:1861733]	206	307	28.5866	31.4072	0.135756
ENSMUST00000049527	ENSMUST00000049527	MGI:104878	Prkar1a	protein kinase, cAMP dependent regulatory, type I, alpha [Source:MGI Symbol;Acc:MGI:104878]	42	306	5.82833	31.3048	2.42523
ENSMUST00000067996	ENSMUST00000067996	MGI:1860267	Set	SET nuclear oncogene [Source:MGI Symbol;Acc:MGI:1860267]	112	306	15.5422	31.3048	1.01019
ENSMUST00000001455	ENSMUST00000001455	MGI:99533	Mef2d	myocyte enhancer factor 2D [Source:MGI Symbol;Acc:MGI:99533]	117	306	16.2361	31.3048	0.947185
ENSMUST00000112968	ENSMUST00000112968	MGI:2679683	Paqr3	progestin and adipoQ receptor family member III [Source:MGI Symbol;Acc:MGI:2679683]	210	306	29.1416	31.3048	0.103304
ENSMUST00000014892	ENSMUST00000014892	MGI:1096575	Tex261	testis expressed gene 261 [Source:MGI Symbol;Acc:MGI:1096575]	80	305	11.1016	31.2025	1.4909
ENSMUST00000149667	ENSMUST00000149667	MGI:1915358	9430008C03Rik	RIKEN cDNA 9430008C03 gene [Source:MGI Symbol;Acc:MGI:1915358]	88	305	12.2117	31.2025	1.3534
ENSMUST00000067538	ENSMUST00000067538	MGI:97815	Ptprs	protein tyrosine phosphatase, receptor type, S [Source:MGI Symbol;Acc:MGI:97815]	164	305	22.7582	31.2025	0.455275
ENSMUST00000134016	ENSMUST00000134016	MGI:1100868	Tbrg4	transforming growth factor beta regulated gene 4 [Source:MGI Symbol;Acc:MGI:1100868]	183	305	25.3949	31.2025	0.297127
ENSMUST00000029331	ENSMUST00000029331	MGI:105049	P2ry1	purinergic receptor P2Y, G-protein coupled 1 [Source:MGI Symbol;Acc:MGI:105049]	133	304	18.4564	31.1002	0.752807
ENSMUST00000141031	ENSMUST00000141031	MGI:1349392	H2afy	H2A histone family, member Y [Source:MGI Symbol;Acc:MGI:1349392]	160	304	22.2032	31.1002	0.486161
ENSMUST00000090541	ENSMUST00000090541	MGI:107653	Atp5g1	ATP synthase, H+ transporting, mitochondrial F0 complex, subunit c1 (subunit 9) [Source:MGI Symbol;Acc:MGI:107653]	171	304	23.7296	31.1002	0.390237
ENSMUST00000115222	ENSMUST00000115222	MGI:1925123	Zbtb44	zinc finger and BTB domain containing 44 [Source:MGI Symbol;Acc:MGI:1925123]	175	304	24.2847	31.1002	0.356878
ENSMUST00000125734	ENSMUST00000125734	MGI:1913611	Zfand1	zinc finger, AN1-type domain 1 [Source:MGI Symbol;Acc:MGI:1913611]	155	303	21.5093	30.9979	0.527211
ENSMUST00000123495	ENSMUST00000123495	MGI:1923728	Haus8	4HAUS augmin-like complex, subunit 8 [Source:MGI Symbol;Acc:MGI:1923728]	259	303	35.9414	30.9979	-0.213473
ENSMUST00000021090	ENSMUST00000021090	MGI:95805	Grb2	growth factor receptor bound protein 2 [Source:MGI Symbol;Acc:MGI:95805]	46	302	6.38341	30.8956	2.275
ENSMUST00000034775	ENSMUST00000034775	MGI:1335087	Fem1b	feminization 1 homolog b (C. elegans) [Source:MGI Symbol;Acc:MGI:1335087]	105	302	14.5708	30.8956	1.08432
ENSMUST00000065567	ENSMUST00000065567	MGI:2685720	Acss3	acyl-CoA synthetase short-chain family member 3 [Source:MGI Symbol;Acc:MGI:2685720]	165	302	22.897	30.8956	0.432244
ENSMUST00000136708	ENSMUST00000136708	MGI:98227	Sag	retinal S-antigen [Source:MGI Symbol;Acc:MGI:98227]	168	302	23.3133	30.8956	0.406249
ENSMUST00000075052	ENSMUST00000075052	MGI:2159566	Kcnh7	potassium voltage-gated channel, subfamily H (eag-related), member 7 [Source:MGI Symbol;Acc:MGI:2159566]	222	302	30.8069	30.8956	0.00415048
ENSMUST00000128115	ENSMUST00000128115	MGI:2442530	Trmt2b	TRM2 tRNA methyltransferase 2B [Source:MGI Symbol;Acc:MGI:2442530]	241	302	33.4435	30.8956	-0.114323
ENSMUST00000109399	ENSMUST00000109399	MGI:2681523	Tnpo1	transportin 1 [Source:MGI Symbol;Acc:MGI:2681523]	78	301	10.824	30.7933	1.50838
ENSMUST00000057373	ENSMUST00000057373	MGI:99425	Rab11b	RAB11B, member RAS oncogene family [Source:MGI Symbol;Acc:MGI:99425]	113	301	15.681	30.7933	0.973602
ENSMUST00000130643	ENSMUST00000130643	MGI:106908	Srpk1	serine/arginine-rich protein specific kinase 1 [Source:MGI Symbol;Acc:MGI:106908]	132	301	18.3176	30.7933	0.749387
ENSMUST00000108813	ENSMUST00000108813	MGI:109372	Cbx5	chromobox 5 [Source:MGI Symbol;Acc:MGI:109372]	103	300	14.2933	30.691	1.10248
ENSMUST00000049393	ENSMUST00000049393	MGI:1929116	Zfp113	zinc finger protein 113 [Source:MGI Symbol;Acc:MGI:1929116]	203	300	28.1703	30.691	0.123644
ENSMUST00000099374	ENSMUST00000099374	MGI:1918780	Gas2l3	growth arrest-specific 2 like 3 [Source:MGI Symbol;Acc:MGI:1918780]	219	300	30.3906	30.691	0.0141932
ENSMUST00000052455	ENSMUST00000052455	MGI:1914806	Pigm	phosphatidylinositol glycan anchor biosynthesis, class M [Source:MGI Symbol;Acc:MGI:1914806]	163	299	22.6195	30.5887	0.435435
ENSMUST00000021262	ENSMUST00000021262	MGI:1098228	Alox8	arachidonate 8-lipoxygenase [Source:MGI Symbol;Acc:MGI:1098228]	171	299	23.7296	30.5887	0.366311
ENSMUST00000085668	ENSMUST00000085668	MGI:3644651	Gm5113	predicted gene 5113 [Source:MGI Symbol;Acc:MGI:3644651]	187	299	25.9499	30.5887	0.237269
ENSMUST00000125031	ENSMUST00000125031	MGI:1354735	Atp11a	ATPase, class VI, type 11A [Source:MGI Symbol;Acc:MGI:1354735]	201	299	27.8927	30.5887	0.133112
ENSMUST00000120245	ENSMUST00000120245	MGI:3650423	Gm13323	predicted gene 13323 [Source:MGI Symbol;Acc:MGI:3650423]	249	299	34.5537	30.5887	-0.175839
ENSMUST00000152306	ENSMUST00000152306	MGI:3649863	Gm11924	predicted gene 11924 [Source:MGI Symbol;Acc:MGI:3649863]	363	299	50.3734	30.5887	-0.719662
ENSMUST00000109625	ENSMUST00000109625	MGI:3512628	Cbx6	chromobox 6 [Source:MGI Symbol;Acc:MGI:3512628]	81	298	11.2403	30.4864	1.43948
ENSMUST00000007993	ENSMUST00000007993	MGI:2655711	Rbm28	RNA binding motif protein 28 [Source:MGI Symbol;Acc:MGI:2655711]	199	298	27.6152	30.4864	0.142706
ENSMUST00000040455	ENSMUST00000040455	MGI:2442345	Hif1an	hypoxia-inducible factor 1, alpha subunit inhibitor [Source:MGI Symbol;Acc:MGI:2442345]	63	297	8.74249	30.3841	1.7972
ENSMUST00000068237	ENSMUST00000068237	MGI:2141183	Mlxip	MLX interacting protein [Source:MGI Symbol;Acc:MGI:2141183]	93	297	12.9056	30.3841	1.23532
ENSMUST00000029812	ENSMUST00000029812	MGI:97312	Nfkb1	nuclear factor of kappa light polypeptide gene enhancer in B cells 1, p105 [Source:MGI Symbol;Acc:MGI:97312]	131	297	18.1788	30.3841	0.741058
ENSMUST00000092915	ENSMUST00000092915	MGI:1921398	Cluh	clustered mitochondria (cluA/CLU1) homolog [Source:MGI Symbol;Acc:MGI:1921398]	166	297	23.0358	30.3841	0.399441
ENSMUST00000134038	ENSMUST00000134038	MGI:1355328	Nasp	nuclear autoantigenic sperm protein (histone-binding) [Source:MGI Symbol;Acc:MGI:1355328]	175	297	24.2847	30.3841	0.32327
ENSMUST00000127966	ENSMUST00000127966	MGI:1924894	C330007P06Rik	RIKEN cDNA C330007P06 gene [Source:MGI Symbol;Acc:MGI:1924894]	287	297	39.8269	30.3841	-0.390426
ENSMUST00000162537	ENSMUST00000162537	MGI:2179432	Mycbp2	MYC binding protein 2 [Source:MGI Symbol;Acc:MGI:2179432]	397	295	55.0916	30.1795	-0.868262
ENSMUST00000048128	ENSMUST00000048128	MGI:1335091	Zbtb7a	zinc finger and BTB domain containing 7a [Source:MGI Symbol;Acc:MGI:1335091]	124	294	17.2074	30.0772	0.805638
ENSMUST00000156602	ENSMUST00000156602	MGI:1335082	Invs	inversin [Source:MGI Symbol;Acc:MGI:1335082]	153	294	21.2318	30.0772	0.502446
ENSMUST00000064099	ENSMUST00000064099	MGI:2442163	Ppp6r1	protein phosphatase 6, regulatory subunit 1 [Source:MGI Symbol;Acc:MGI:2442163]	168	294	23.3133	30.0772	0.367517
ENSMUST00000042868	ENSMUST00000042868	MGI:88258	Camk4	calcium/calmodulin-dependent protein kinase IV [Source:MGI Symbol;Acc:MGI:88258]	168	294	23.3133	30.0772	0.367517
ENSMUST00000018851	ENSMUST00000018851	MGI:103147	Dync1h1	dynein cytoplasmic 1 heavy chain 1 [Source:MGI Symbol;Acc:MGI:103147]	226	294	31.362	30.0772	-0.060345
ENSMUST00000112775	ENSMUST00000112775	MGI:1920799	1700110I01Rik	RIKEN cDNA 1700110I01 gene [Source:MGI Symbol;Acc:MGI:1920799]	454	294	63.0015	30.0772	-1.06671
ENSMUST00000000284	ENSMUST00000000284	MGI:102749	Trim25	tripartite motif-containing 25 [Source:MGI Symbol;Acc:MGI:102749]	59	293	8.18741	29.9749	1.87228
ENSMUST00000030917	ENSMUST00000030917	MGI:98310	Ski	ski sarcoma viral oncogene homolog (avian) [Source:MGI Symbol;Acc:MGI:98310]	83	293	11.5179	29.9749	1.37988
ENSMUST00000019038	ENSMUST00000019038	MGI:1858222	Sept9	septin 9 [Source:MGI Symbol;Acc:MGI:1858222]	118	293	16.3748	29.9749	0.872275
ENSMUST00000057293	ENSMUST00000057293	MGI:2679002	Prr12	proline rich 12 [Source:MGI Symbol;Acc:MGI:2679002]	140	293	19.4278	29.9749	0.625635
ENSMUST00000181045	ENSMUST00000181045		AC147987.1		142	293	19.7053	29.9749	0.605171
ENSMUST00000160708	ENSMUST00000160708	MGI:107370	Stxbp2	syntaxin binding protein 2 [Source:MGI Symbol;Acc:MGI:107370]	142	293	19.7053	29.9749	0.605171
ENSMUST00000085383	ENSMUST00000085383	MGI:2141980	Scaf1	SR-related CTD-associated factor 1 [Source:MGI Symbol;Acc:MGI:2141980]	155	293	21.5093	29.9749	0.478794
ENSMUST00000079812	ENSMUST00000079812	MGI:97364	Notch2	notch 2 [Source:MGI Symbol;Acc:MGI:97364]	156	293	21.6481	29.9749	0.469516
ENSMUST00000045747	ENSMUST00000045747	MGI:98957	Wnt4	wingless-related MMTV integration site 4 [Source:MGI Symbol;Acc:MGI:98957]	215	293	29.8355	29.9749	0.00672562
ENSMUST00000101294	ENSMUST00000101294	MGI:2685222	Gpr174	G protein-coupled receptor 174 [Source:MGI Symbol;Acc:MGI:2685222]	376	293	52.1774	29.9749	-0.79967
ENSMUST00000032557	ENSMUST00000032557	MGI:99638	Mark2	MAP/microtubule affinity-regulating kinase 2 [Source:MGI Symbol;Acc:MGI:99638]	88	292	12.2117	29.8726	1.29055
ENSMUST00000056641	ENSMUST00000056641	MGI:2674093	Psd4	pleckstrin and Sec7 domain containing 4 [Source:MGI Symbol;Acc:MGI:2674093]	187	292	25.9499	29.8726	0.203092
ENSMUST00000177665	ENSMUST00000177665	MGI:5433997	Gm21833	predicted gene, 21833 [Source:MGI Symbol;Acc:MGI:5433997]	348	292	48.2919	29.8726	-0.692957
ENSMUST00000047534	ENSMUST00000047534	MGI:2448487	Fam168b	family with sequence similarity 168, member B [Source:MGI Symbol;Acc:MGI:2448487]	66	291	9.1588	29.7703	1.70064
ENSMUST00000044475	ENSMUST00000044475	MGI:1339639	Ogt	O-linked N-acetylglucosamine (GlcNAc) transferase (UDP-N-acetylglucosamine:polypeptide-N-acetylglucosaminyl transferase) [Source:MGI Symbol;Acc:MGI:1339639]	121	291	16.7911	29.7703	0.826174
ENSMUST00000141960	ENSMUST00000141960	MGI:107914	Tia1	cytotoxic granule-associated RNA binding protein 1 [Source:MGI Symbol;Acc:MGI:107914]	144	291	19.9828	29.7703	0.575112
ENSMUST00000088295	ENSMUST00000088295	MGI:1917522	Chpf2	chondroitin polymerizing factor 2 [Source:MGI Symbol;Acc:MGI:1917522]	163	291	22.6195	29.7703	0.396309
ENSMUST00000123350	ENSMUST00000123350	MGI:1913685	Uggt2	UDP-glucose glycoprotein glucosyltransferase 2 [Source:MGI Symbol;Acc:MGI:1913685]	264	291	36.6352	29.7703	-0.299357
ENSMUST00000100802	ENSMUST00000100802	MGI:1915814	Nufip2	nuclear fragile X mental retardation protein interacting protein 2 [Source:MGI Symbol;Acc:MGI:1915814]	147	290	20.3991	29.668	0.540398
ENSMUST00000035497	ENSMUST00000035497	MGI:1916308	Oscp1	organic solute carrier partner 1 [Source:MGI Symbol;Acc:MGI:1916308]	156	290	21.6481	29.668	0.454668
ENSMUST00000021670	ENSMUST00000021670	MGI:1926195	Ylpm1	YLP motif containing 1 [Source:MGI Symbol;Acc:MGI:1926195]	167	290	23.1745	29.668	0.356366
ENSMUST00000139649	ENSMUST00000139649	MGI:2443627	Plekhm3	pleckstrin homology domain containing, family M, member 3 [Source:MGI Symbol;Acc:MGI:2443627]	175	290	24.2847	29.668	0.28886
ENSMUST00000148478	ENSMUST00000148478	MGI:3782983	Gm15535	predicted gene 15535 [Source:MGI Symbol;Acc:MGI:3782983]	182	290	25.2561	29.668	0.232276
ENSMUST00000180936	ENSMUST00000180936		AC121121.1		207	290	28.7253	29.668	0.0465837
ENSMUST00000161858	ENSMUST00000161858	MGI:1917581	Shprh	SNF2 histone linker PHD RING helicase [Source:MGI Symbol;Acc:MGI:1917581]	223	290	30.9456	29.668	-0.0608292
ENSMUST00000073316	ENSMUST00000073316	MGI:1347487	Foxm1	forkhead box M1 [Source:MGI Symbol;Acc:MGI:1347487]	164	289	22.7582	29.5657	0.377535
ENSMUST00000043864	ENSMUST00000043864	MGI:2138811	Cdc123	cell division cycle 123 [Source:MGI Symbol;Acc:MGI:2138811]	167	289	23.1745	29.5657	0.351383
ENSMUST00000082177	ENSMUST00000082177	MGI:99781	Kdm5c	lysine (K)-specific demethylase 5C [Source:MGI Symbol;Acc:MGI:99781]	168	289	23.3133	29.5657	0.34277
ENSMUST00000154606	ENSMUST00000154606	MGI:1920582	Ccdc30	coiled-coil domain containing 30 [Source:MGI Symbol;Acc:MGI:1920582]	171	289	23.7296	29.5657	0.317235
ENSMUST00000171747	ENSMUST00000171747	MGI:3708526	Gm9929	predicted gene 9929 [Source:MGI Symbol;Acc:MGI:3708526]	150	288	20.8155	29.4634	0.501268
ENSMUST00000180999	ENSMUST00000180999		AC154625.1		151	288	20.9542	29.4634	0.491682
ENSMUST00000083065	ENSMUST00000083065	MGI:5455812	Gm26035	predicted gene, 26035 [Source:MGI Symbol;Acc:MGI:5455812]	158	288	21.9256	29.4634	0.426306
ENSMUST00000003152	ENSMUST00000003152	MGI:1341870	Stk11	serine/threonine kinase 11 [Source:MGI Symbol;Acc:MGI:1341870]	170	288	23.5909	29.4634	0.320696
ENSMUST00000165458	ENSMUST00000165458	MGI:4937111	Gm17477	predicted gene, 17477 [Source:MGI Symbol;Acc:MGI:4937111]	187	288	25.9499	29.4634	0.183192
ENSMUST00000032891	ENSMUST00000032891	MGI:1919742	Smg1	SMG1 homolog, phosphatidylinositol 3-kinase-related kinase (C. elegans) [Source:MGI Symbol;Acc:MGI:1919742]	207	288	28.7253	29.4634	0.0365997
ENSMUST00000018437	ENSMUST00000018437	MGI:97549	Pfn1	profilin 1 [Source:MGI Symbol;Acc:MGI:97549]	167	287	23.1745	29.3611	0.341364
ENSMUST00000081339	ENSMUST00000081339	MGI:1919712	Rrp1b	ribosomal RNA processing 1 homolog B (S. cerevisiae) [Source:MGI Symbol;Acc:MGI:1919712]	179	287	24.8398	29.3611	0.241253
ENSMUST00000114853	ENSMUST00000114853	MGI:97601	Prkcq	protein kinase C, theta [Source:MGI Symbol;Acc:MGI:97601]	212	287	29.4192	29.3611	-0.00285192
ENSMUST00000042055	ENSMUST00000042055	MGI:1346006	Ppp2r4	protein phosphatase 2A, regulatory subunit B (PR 53) [Source:MGI Symbol;Acc:MGI:1346006]	121	286	16.7911	29.2588	0.80117
ENSMUST00000160523	ENSMUST00000160523	MGI:1313276	Vamp1	vesicle-associated membrane protein 1 [Source:MGI Symbol;Acc:MGI:1313276]	144	286	19.9828	29.2588	0.550108
ENSMUST00000028081	ENSMUST00000028081	MGI:1914698	Plxdc2	plexin domain containing 2 [Source:MGI Symbol;Acc:MGI:1914698]	155	286	21.5093	29.2588	0.443909
ENSMUST00000180531	ENSMUST00000180531	MGI:2445054	Senp1	SUMO1/sentrin specific peptidase 1 [Source:MGI Symbol;Acc:MGI:2445054]	157	286	21.7868	29.2588	0.425412
ENSMUST00000004622	ENSMUST00000004622	MGI:1333854	Gab2	growth factor receptor bound protein 2-associated protein 2 [Source:MGI Symbol;Acc:MGI:1333854]	165	286	22.897	29.2588	0.353711
ENSMUST00000001712	ENSMUST00000001712	MGI:1298375	Cabin1	calcineurin binding protein 1 [Source:MGI Symbol;Acc:MGI:1298375]	201	286	27.8927	29.2588	0.0689813
ENSMUST00000026985	ENSMUST00000026985	MGI:104726	Cplx2	complexin 2 [Source:MGI Symbol;Acc:MGI:104726]	439	286	60.9199	29.2588	-1.05804
ENSMUST00000002518	ENSMUST00000002518	MGI:95806	Aes	amino-terminal enhancer of split [Source:MGI Symbol;Acc:MGI:95806]	95	285	13.1831	29.1565	1.14512
ENSMUST00000159199	ENSMUST00000159199	MGI:1333799	Xrcc4	X-ray repair complementing defective repair in Chinese hamster cells 4 [Source:MGI Symbol;Acc:MGI:1333799]	260	285	36.0801	29.1565	-0.307388
ENSMUST00000034400	ENSMUST00000034400	MGI:1913677	Cyb5b	cytochrome b5 type B [Source:MGI Symbol;Acc:MGI:1913677]	112	284	15.5422	29.0542	0.902554
ENSMUST00000069098	ENSMUST00000069098	MGI:2444575	Soga1	suppressor of glucose, autophagy associated 1 [Source:MGI Symbol;Acc:MGI:2444575]	132	284	18.3176	29.0542	0.665515
ENSMUST00000034966	ENSMUST00000034966	MGI:1915141	Rpl4	ribosomal protein L4 [Source:MGI Symbol;Acc:MGI:1915141]	215	284	29.8355	29.0542	-0.0382841
ENSMUST00000045866	ENSMUST00000045866	MGI:1860494	Ddx21	DEAD (Asp-Glu-Ala-Asp) box polypeptide 21 [Source:MGI Symbol;Acc:MGI:1860494]	151	283	20.9542	28.9519	0.466415
ENSMUST00000036253	ENSMUST00000036253	MGI:3648294	Tnrc18	trinucleotide repeat containing 18 [Source:MGI Symbol;Acc:MGI:3648294]	155	283	21.5093	28.9519	0.428695
ENSMUST00000174926	ENSMUST00000174926	MGI:5452184	Gm22407	predicted gene, 22407 [Source:MGI Symbol;Acc:MGI:5452184]	157	283	21.7868	28.9519	0.410199
ENSMUST00000026122	ENSMUST00000026122	MGI:97464	P4hb	prolyl 4-hydroxylase, beta polypeptide [Source:MGI Symbol;Acc:MGI:97464]	71	282	9.85265	28.8496	1.54997
ENSMUST00000041139	ENSMUST00000041139	MGI:2442982	Rab8b	RAB8B, member RAS oncogene family [Source:MGI Symbol;Acc:MGI:2442982]	97	282	13.4607	28.8496	1.0998
ENSMUST00000043560	ENSMUST00000043560	MGI:2682334	Smg7	Smg-7 homolog, nonsense mediated mRNA decay factor (C. elegans) [Source:MGI Symbol;Acc:MGI:2682334]	107	282	14.8484	28.8496	0.958246
ENSMUST00000023509	ENSMUST00000023509	MGI:1923035	Klhl24	kelch-like 24 [Source:MGI Symbol;Acc:MGI:1923035]	150	282	20.8155	28.8496	0.470894
ENSMUST00000055858	ENSMUST00000055858	MGI:1914226	2410002F23Rik	RIKEN cDNA 2410002F23 gene [Source:MGI Symbol;Acc:MGI:1914226]	169	282	23.4521	28.8496	0.298834
ENSMUST00000092640	ENSMUST00000092640	MGI:98304	St3gal1	ST3 beta-galactoside alpha-2,3-sialyltransferase 1 [Source:MGI Symbol;Acc:MGI:98304]	87	281	12.073	28.7473	1.25164
ENSMUST00000021154	ENSMUST00000021154	MGI:1924827	Spns3	spinster homolog 3 [Source:MGI Symbol;Acc:MGI:1924827]	105	281	14.5708	28.7473	0.980342
ENSMUST00000174618	ENSMUST00000174618	MGI:1934682	Emc9	ER membrane protein complex subunit 9 [Source:MGI Symbol;Acc:MGI:1934682]	149	281	20.6767	28.7473	0.475419
ENSMUST00000073308	ENSMUST00000073308	MGI:99960	Ewsr1	Ewing sarcoma breakpoint region 1 [Source:MGI Symbol;Acc:MGI:99960]	170	281	23.5909	28.7473	0.285197
ENSMUST00000175765	ENSMUST00000175765	MGI:2152213	Tirap	toll-interleukin 1 receptor (TIR) domain-containing adaptor protein [Source:MGI Symbol;Acc:MGI:2152213]	134	280	18.5951	28.645	0.623355
ENSMUST00000071268	ENSMUST00000071268	MGI:1915919	Taok2	TAO kinase 2 [Source:MGI Symbol;Acc:MGI:1915919]	142	280	19.7053	28.645	0.539698
ENSMUST00000062357	ENSMUST00000062357	MGI:1925441	4930539E08Rik	RIKEN cDNA 4930539E08 gene [Source:MGI Symbol;Acc:MGI:1925441]	161	280	22.3419	28.645	0.358528
ENSMUST00000045301	ENSMUST00000045301	MGI:107502	Hist1h1d	histone cluster 1, H1d [Source:MGI Symbol;Acc:MGI:107502]	173	280	24.0072	28.645	0.254816
ENSMUST00000034707	ENSMUST00000034707	MGI:88192	Smarca4	SWI/SNF related, matrix associated, actin dependent regulator of chromatin, subfamily a, member 4 [Source:MGI Symbol;Acc:MGI:88192]	183	280	25.3949	28.645	0.173745
ENSMUST00000025955	ENSMUST00000025955	MGI:95301	Eif3a	eukaryotic translation initiation factor 3, subunit A [Source:MGI Symbol;Acc:MGI:95301]	209	280	29.0029	28.645	-0.0179145
ENSMUST00000068892	ENSMUST00000068892	MGI:1344416	Ash2l	ash2 (absent, small, or homeotic)-like (Drosophila) [Source:MGI Symbol;Acc:MGI:1344416]	143	279	19.8441	28.5427	0.524412
ENSMUST00000160089	ENSMUST00000160089	MGI:3801907	Gm16241	predicted gene 16241 [Source:MGI Symbol;Acc:MGI:3801907]	179	279	24.8398	28.5427	0.200467
ENSMUST00000123192	ENSMUST00000123192	MGI:104900	Nup88	nucleoporin 88 [Source:MGI Symbol;Acc:MGI:104900]	190	279	26.3662	28.5427	0.114427
ENSMUST00000045291	ENSMUST00000045291	MGI:2444959	Mll3	myeloid/lymphoid or mixed-lineage leukemia 3 [Source:MGI Symbol;Acc:MGI:2444959]	215	279	29.8355	28.5427	-0.0639099
ENSMUST00000127253	ENSMUST00000127253	MGI:1289321	Mrpl48	mitochondrial ribosomal protein L48 [Source:MGI Symbol;Acc:MGI:1289321]	330	279	45.794	28.5427	-0.682039
ENSMUST00000069395	ENSMUST00000069395	MGI:2444286	Zzef1	zinc finger, ZZ-type with EF hand domain 1 [Source:MGI Symbol;Acc:MGI:2444286]	139	278	19.289	28.4404	0.560162
ENSMUST00000020846	ENSMUST00000020846	MGI:107606	Srebf1	sterol regulatory element binding transcription factor 1 [Source:MGI Symbol;Acc:MGI:107606]	108	277	14.9871	28.338	0.919016
ENSMUST00000095310	ENSMUST00000095310	MGI:2443807	Osbpl8	oxysterol binding protein-like 8 [Source:MGI Symbol;Acc:MGI:2443807]	150	277	20.8155	28.338	0.445085
ENSMUST00000002291	ENSMUST00000002291	MGI:1890430	Paxip1	PAX interacting (with transcription-activation domain) protein 1 [Source:MGI Symbol;Acc:MGI:1890430]	154	277	21.3705	28.338	0.407117
ENSMUST00000179577	ENSMUST00000179577	MGI:2444706	Mdga2	MAM domain containing glycosylphosphatidylinositol anchor 2 [Source:MGI Symbol;Acc:MGI:2444706]	192	277	26.6438	28.338	0.0889413
ENSMUST00000124269	ENSMUST00000124269	MGI:1354184	Nox4	NADPH oxidase 4 [Source:MGI Symbol;Acc:MGI:1354184]	267	277	37.0515	28.338	-0.386792
ENSMUST00000033827	ENSMUST00000033827	MGI:1345146	Grk1	G protein-coupled receptor kinase 1 [Source:MGI Symbol;Acc:MGI:1345146]	311	277	43.1574	28.338	-0.606867
ENSMUST00000058464	ENSMUST00000058464	MGI:1919157	Serpina9	serine (or cysteine) peptidase inhibitor, clade A (alpha-1 antiproteinase, antitrypsin), member 9 [Source:MGI Symbol;Acc:MGI:1919157]	412	277	57.1731	28.338	-1.0126
ENSMUST00000084968	ENSMUST00000084968	MGI:106340	Rcor1	REST corepressor 1 [Source:MGI Symbol;Acc:MGI:106340]	86	276	11.9342	28.2357	1.24242
ENSMUST00000026658	ENSMUST00000026658	MGI:2443265	Tnrc6c	trinucleotide repeat containing 6C [Source:MGI Symbol;Acc:MGI:2443265]	134	276	18.5951	28.2357	0.602597
ENSMUST00000092404	ENSMUST00000092404	MGI:98284	Srsf2	serine/arginine-rich splicing factor 2 [Source:MGI Symbol;Acc:MGI:98284]	183	276	25.3949	28.2357	0.152986
ENSMUST00000141419	ENSMUST00000141419	MGI:1916417	Ppp1r12b	protein phosphatase 1, regulatory (inhibitor) subunit 12B [Source:MGI Symbol;Acc:MGI:1916417]	212	276	29.4192	28.2357	-0.0592344
ENSMUST00000046929	ENSMUST00000046929	MGI:1923429	Usp31	ubiquitin specific peptidase 31 [Source:MGI Symbol;Acc:MGI:1923429]	90	275	12.4893	28.1334	1.1716
ENSMUST00000081695	ENSMUST00000081695	MGI:1917579	Gon4l	gon-4-like (C.elegans) [Source:MGI Symbol;Acc:MGI:1917579]	166	275	23.0358	28.1334	0.28841
ENSMUST00000110127	ENSMUST00000110127	MGI:1920345	Slc25a42	solute carrier family 25, member 42 [Source:MGI Symbol;Acc:MGI:1920345]	391	275	54.259	28.1334	-0.947575
ENSMUST00000062686	ENSMUST00000062686	MGI:1346871	Map2k7	mitogen-activated protein kinase kinase 7 [Source:MGI Symbol;Acc:MGI:1346871]	52	274	7.21603	28.0311	1.95775
ENSMUST00000110383	ENSMUST00000110383	MGI:2444879	Fam65b	family with sequence similarity 65, member B [Source:MGI Symbol;Acc:MGI:2444879]	116	274	16.0973	28.0311	0.800213
ENSMUST00000109260	ENSMUST00000109260	MGI:2144243	Clint1	clathrin interactor 1 [Source:MGI Symbol;Acc:MGI:2144243]	131	274	18.1788	28.0311	0.624771
ENSMUST00000133960	ENSMUST00000133960	MGI:3510989	AI838599	expressed sequence AI838599 [Source:MGI Symbol;Acc:MGI:3510989]	228	274	31.6395	28.0311	-0.174696
ENSMUST00000030669	ENSMUST00000030669	MGI:102462	Slc9a1	solute carrier family 9 (sodium/hydrogen exchanger), member 1 [Source:MGI Symbol;Acc:MGI:102462]	83	273	11.5179	27.9288	1.27788
ENSMUST00000020463	ENSMUST00000020463	MGI:1926081	Ncln	nicalin homolog (zebrafish) [Source:MGI Symbol;Acc:MGI:1926081]	121	273	16.7911	27.9288	0.734056
ENSMUST00000004202	ENSMUST00000004202	MGI:94912	Dnmt1	DNA methyltransferase (cytosine-5) 1 [Source:MGI Symbol;Acc:MGI:94912]	180	273	24.9785	27.9288	0.161066
ENSMUST00000175206	ENSMUST00000175206	MGI:5453173	Gm23396	predicted gene, 23396 [Source:MGI Symbol;Acc:MGI:5453173]	191	273	26.505	27.9288	0.0754899
ENSMUST00000142650	ENSMUST00000142650	MGI:1355329	Mink1	misshapen-like kinase 1 (zebrafish) [Source:MGI Symbol;Acc:MGI:1355329]	15	272	2.08155	27.8265	3.74073
ENSMUST00000168828	ENSMUST00000168828	MGI:1352495	Zfp385a	zinc finger protein 385A [Source:MGI Symbol;Acc:MGI:1352495]	58	272	8.04864	27.8265	1.78964
ENSMUST00000035214	ENSMUST00000035214	MGI:1351633	Ip6k1	inositol hexaphosphate kinase 1 [Source:MGI Symbol;Acc:MGI:1351633]	95	272	13.1831	27.8265	1.07777
ENSMUST00000037947	ENSMUST00000037947	MGI:101769	Mcl1	myeloid cell leukemia sequence 1 [Source:MGI Symbol;Acc:MGI:101769]	115	272	15.9585	27.8265	0.802134
ENSMUST00000154002	ENSMUST00000154002	MGI:1201681	Dennd5a	DENN/MADD domain containing 5A [Source:MGI Symbol;Acc:MGI:1201681]	142	272	19.7053	27.8265	0.497877
ENSMUST00000133653	ENSMUST00000133653	MGI:3705271	Gm15462	predicted gene 15462 [Source:MGI Symbol;Acc:MGI:3705271]	189	272	26.2275	27.8265	0.085382
ENSMUST00000145842	ENSMUST00000145842	MGI:1914312	Slc25a53	solute carrier family 25, member 53 [Source:MGI Symbol;Acc:MGI:1914312]	223	272	30.9456	27.8265	-0.153275
ENSMUST00000038488	ENSMUST00000038488	MGI:2446134	Sidt2	SID1 transmembrane family, member 2 [Source:MGI Symbol;Acc:MGI:2446134]	89	271	12.3505	27.7242	1.16658
ENSMUST00000033096	ENSMUST00000033096	MGI:97388	Nucb1	nucleobindin 1 [Source:MGI Symbol;Acc:MGI:97388]	105	271	14.5708	27.7242	0.928065
ENSMUST00000175587	ENSMUST00000175587	MGI:5454751	Gm24974	predicted gene, 24974 [Source:MGI Symbol;Acc:MGI:5454751]	143	271	19.8441	27.7242	0.482439
ENSMUST00000141112	ENSMUST00000141112	MGI:2140466	AU022252	expressed sequence AU022252 [Source:MGI Symbol;Acc:MGI:2140466]	149	271	20.6767	27.7242	0.423142
ENSMUST00000013931	ENSMUST00000013931	MGI:2148922	Ehmt2	euchromatic histone lysine N-methyltransferase 2 [Source:MGI Symbol;Acc:MGI:2148922]	169	271	23.4521	27.7242	0.241431
ENSMUST00000048966	ENSMUST00000048966	MGI:108399	Tcf20	transcription factor 20 [Source:MGI Symbol;Acc:MGI:108399]	211	271	29.2804	27.7242	-0.0787885
ENSMUST00000130656	ENSMUST00000130656	MGI:2384588	Neil3	nei like 3 (E. coli) [Source:MGI Symbol;Acc:MGI:2384588]	211	271	29.2804	27.7242	-0.0787885
ENSMUST00000097494	ENSMUST00000097494	MGI:3041173	9930111J21Rik1	RIKEN cDNA 9930111J21 gene 1 [Source:MGI Symbol;Acc:MGI:3041173]	279	271	38.7168	27.7242	-0.481811
ENSMUST00000095457	ENSMUST00000095457	MGI:97791	Ptbp1	polypyrimidine tract binding protein 1 [Source:MGI Symbol;Acc:MGI:97791]	64	270	8.88126	27.6219	1.63698
ENSMUST00000029549	ENSMUST00000029549	MGI:1890149	Tpm3	tropomyosin 3, gamma [Source:MGI Symbol;Acc:MGI:1890149]	106	270	14.7096	27.6219	0.909057
ENSMUST00000107773	ENSMUST00000107773	MGI:98775	Tmod1	tropomodulin 1 [Source:MGI Symbol;Acc:MGI:98775]	136	270	18.8727	27.6219	0.549514
ENSMUST00000025649	ENSMUST00000025649	MGI:1202384	Ddb1	damage specific DNA binding protein 1 [Source:MGI Symbol;Acc:MGI:1202384]	186	270	25.8112	27.6219	0.0978184
ENSMUST00000105897	ENSMUST00000105897	MGI:1935147	Arid1a	AT rich interactive domain 1A (SWI-like) [Source:MGI Symbol;Acc:MGI:1935147]	93	269	12.9056	27.5196	1.09247
ENSMUST00000057844	ENSMUST00000057844	MGI:1925771	B230219D22Rik	RIKEN cDNA B230219D22 gene [Source:MGI Symbol;Acc:MGI:1925771]	117	269	16.2361	27.5196	0.761259
ENSMUST00000153581	ENSMUST00000153581	MGI:1913852	1700020I14Rik	RIKEN cDNA 1700020I14 gene [Source:MGI Symbol;Acc:MGI:1913852]	131	269	18.1788	27.5196	0.598201
ENSMUST00000139467	ENSMUST00000139467	MGI:1925022	Dcst1	DC-STAMP domain containing 1 [Source:MGI Symbol;Acc:MGI:1925022]	144	269	19.9828	27.5196	0.461699
ENSMUST00000161448	ENSMUST00000161448	MGI:1860402	Zfp316	zinc finger protein 316 [Source:MGI Symbol;Acc:MGI:1860402]	158	269	21.9256	27.5196	0.327843
ENSMUST00000113440	ENSMUST00000113440	MGI:1925567	Ccdc88b	coiled-coil domain containing 88B [Source:MGI Symbol;Acc:MGI:1925567]	170	269	23.5909	27.5196	0.222233
ENSMUST00000109764	ENSMUST00000109764	MGI:97311	Nfix	nuclear factor I/X [Source:MGI Symbol;Acc:MGI:97311]	61	267	8.46495	27.315	1.69012
ENSMUST00000077440	ENSMUST00000077440	MGI:1859333	Nfat5	nuclear factor of activated T cells 5 [Source:MGI Symbol;Acc:MGI:1859333]	103	267	14.2933	27.315	0.934357
ENSMUST00000005051	ENSMUST00000005051	MGI:96759	Ldha	lactate dehydrogenase A [Source:MGI Symbol;Acc:MGI:96759]	112	267	15.5422	27.315	0.813503
ENSMUST00000068031	ENSMUST00000068031	MGI:98790	Top2a	topoisomerase (DNA) II alpha [Source:MGI Symbol;Acc:MGI:98790]	133	267	18.4564	27.315	0.565575
ENSMUST00000182881	ENSMUST00000182881	MGI:1914289	Rbm25	RNA binding motif protein 25 [Source:MGI Symbol;Acc:MGI:1914289]	151	267	20.9542	27.315	0.382453
ENSMUST00000090860	ENSMUST00000090860	MGI:3779109	Gm10116	predicted pseudogene 10116 [Source:MGI Symbol;Acc:MGI:3779109]	166	267	23.0358	27.315	0.245818
ENSMUST00000180471	ENSMUST00000180471		AC123608.1		266	267	36.9127	27.315	-0.434425
ENSMUST00000105255	ENSMUST00000105255	MGI:1098748	Ctdsp2	CTD (carboxy-terminal domain, RNA polymerase II, polypeptide A) small phosphatase 2 [Source:MGI Symbol;Acc:MGI:1098748]	74	266	10.269	27.2127	1.40599
ENSMUST00000029941	ENSMUST00000029941	MGI:1927489	Pdlim5	PDZ and LIM domain 5 [Source:MGI Symbol;Acc:MGI:1927489]	105	266	14.5708	27.2127	0.901199
ENSMUST00000087655	ENSMUST00000087655	MGI:2147191	Tnfaip8	tumor necrosis factor, alpha-induced protein 8 [Source:MGI Symbol;Acc:MGI:2147191]	142	266	19.7053	27.2127	0.465697
ENSMUST00000040603	ENSMUST00000040603	MGI:1924809	Agl	amylo-1,6-glucosidase, 4-alpha-glucanotransferase [Source:MGI Symbol;Acc:MGI:1924809]	157	266	21.7868	27.2127	0.320823
ENSMUST00000179543	ENSMUST00000179543	MGI:1931051	Noc2l	nucleolar complex associated 2 homolog (S. cerevisiae) [Source:MGI Symbol;Acc:MGI:1931051]	140	265	19.4278	27.1104	0.480727
ENSMUST00000077119	ENSMUST00000077119	MGI:2153041	Gjc3	gap junction protein, gamma 3 [Source:MGI Symbol;Acc:MGI:2153041]	170	265	23.5909	27.1104	0.200619
ENSMUST00000180512	ENSMUST00000180512		AC114820.1		102	264	14.1545	27.0081	0.93213
ENSMUST00000085673	ENSMUST00000085673	MGI:104662	Pml	promyelocytic leukemia [Source:MGI Symbol;Acc:MGI:104662]	119	264	16.5136	27.0081	0.709738
ENSMUST00000170320	ENSMUST00000170320	MGI:2443254	Agbl2	ATP/GTP binding protein-like 2 [Source:MGI Symbol;Acc:MGI:2443254]	150	264	20.8155	27.0081	0.375737
ENSMUST00000010421	ENSMUST00000010421	MGI:1919753	2610507B11Rik	RIKEN cDNA 2610507B11 gene [Source:MGI Symbol;Acc:MGI:1919753]	192	264	26.6438	27.0081	0.0195932
ENSMUST00000002699	ENSMUST00000002699	MGI:1928488	Akap8	A kinase (PRKA) anchor protein 8 [Source:MGI Symbol;Acc:MGI:1928488]	104	263	14.4321	26.9058	0.898641
ENSMUST00000021062	ENSMUST00000021062	MGI:105037	Ddx5	DEAD (Asp-Glu-Ala-Asp) box polypeptide 5 [Source:MGI Symbol;Acc:MGI:105037]	173	263	24.0072	26.9058	0.164452
ENSMUST00000126683	ENSMUST00000126683	MGI:106908	Srpk1	serine/arginine-rich protein specific kinase 1 [Source:MGI Symbol;Acc:MGI:106908]	199	263	27.6152	26.9058	-0.037544
ENSMUST00000151252	ENSMUST00000151252	MGI:2442284	Zmat1	zinc finger, matrin type 1 [Source:MGI Symbol;Acc:MGI:2442284]	201	263	27.8927	26.9058	-0.0519711
ENSMUST00000158164	ENSMUST00000158164	MGI:4360027	Scarna13	small Cajal body-specific RNA 1 [Source:MGI Symbol;Acc:MGI:4360027]	82	262	11.3791	26.8035	1.23603
ENSMUST00000028981	ENSMUST00000028981	MGI:891995	Mapre1	microtubule-associated protein, RP/EB family, member 1 [Source:MGI Symbol;Acc:MGI:891995]	114	262	15.8197	26.8035	0.760695
ENSMUST00000065169	ENSMUST00000065169	MGI:2384585	Gatad2a	GATA zinc finger domain containing 2A [Source:MGI Symbol;Acc:MGI:2384585]	130	262	18.0401	26.8035	0.571217
ENSMUST00000172082	ENSMUST00000172082	MGI:1914404	Mtdh	metadherin [Source:MGI Symbol;Acc:MGI:1914404]	147	262	20.3991	26.8035	0.393912
ENSMUST00000078752	ENSMUST00000078752	MGI:2443129	Casc4	cancer susceptibility candidate 4 [Source:MGI Symbol;Acc:MGI:2443129]	154	262	21.3705	26.8035	0.326798
ENSMUST00000022793	ENSMUST00000022793	MGI:1891824	Acin1	apoptotic chromatin condensation inducer 1 [Source:MGI Symbol;Acc:MGI:1891824]	173	262	24.0072	26.8035	0.158956
ENSMUST00000168137	ENSMUST00000168137	MGI:3642105	5830462I19Rik	RIKEN cDNA 5830462I19 gene [Source:MGI Symbol;Acc:MGI:3642105]	173	262	24.0072	26.8035	0.158956
ENSMUST00000036854	ENSMUST00000036854	MGI:106504	Efhd2	EF hand domain containing 2 [Source:MGI Symbol;Acc:MGI:106504]	47	261	6.52218	26.7012	2.03348
ENSMUST00000100050	ENSMUST00000100050	MGI:2683854	Klhl41	kelch-like 41 [Source:MGI Symbol;Acc:MGI:2683854]	152	261	21.093	26.7012	0.34014
ENSMUST00000000756	ENSMUST00000000756	MGI:105922	Rpl13	ribosomal protein L13 [Source:MGI Symbol;Acc:MGI:105922]	201	261	27.8927	26.7012	-0.0629841
ENSMUST00000107864	ENSMUST00000107864	MGI:2441680	Tmem8b	transmembrane protein 8B [Source:MGI Symbol;Acc:MGI:2441680]	293	261	40.6595	26.7012	-0.606689
ENSMUST00000053355	ENSMUST00000053355	MGI:1928333	Creg2	cellular repressor of E1A-stimulated genes 2 [Source:MGI Symbol;Acc:MGI:1928333]	121	260	16.7911	26.5989	0.663666
ENSMUST00000116547	ENSMUST00000116547	MGI:1344694	Chic1	cysteine-rich hydrophobic domain 1 [Source:MGI Symbol;Acc:MGI:1344694]	129	260	17.9013	26.5989	0.571302
ENSMUST00000061859	ENSMUST00000061859	MGI:90673	D17H6S53E	DNA segment, Chr 17, human D6S53E [Source:MGI Symbol;Acc:MGI:90673]	130	260	18.0401	26.5989	0.560162
ENSMUST00000156128	ENSMUST00000156128	MGI:1920197	Agxt2l2	alanine-glyoxylate aminotransferase 2-like 2 [Source:MGI Symbol;Acc:MGI:1920197]	148	260	20.5379	26.5989	0.373076
ENSMUST00000014421	ENSMUST00000014421	MGI:1932101	Ankrd17	ankyrin repeat domain 17 [Source:MGI Symbol;Acc:MGI:1932101]	151	260	20.9542	26.5989	0.344125
ENSMUST00000048453	ENSMUST00000048453	MGI:3045247	Btbd16	BTB (POZ) domain containing 16 [Source:MGI Symbol;Acc:MGI:3045247]	187	260	25.9499	26.5989	0.035635
ENSMUST00000173731	ENSMUST00000173731	MGI:99240	Ddx39b	DEAD (Asp-Glu-Ala-Asp) box polypeptide 39B [Source:MGI Symbol;Acc:MGI:99240]	71	259	9.85265	26.4966	1.42722
ENSMUST00000052374	ENSMUST00000052374	MGI:103071	Rangap1	RAN GTPase activating protein 1 [Source:MGI Symbol;Acc:MGI:103071]	77	259	10.6853	26.4966	1.31018
ENSMUST00000114859	ENSMUST00000114859	MGI:106281	D17Wsu92e	DNA segment, Chr 17, Wayne State University 92, expressed [Source:MGI Symbol;Acc:MGI:106281]	85	259	11.7954	26.4966	1.16758
ENSMUST00000052838	ENSMUST00000052838	MGI:2443157	Mib1	mindbomb homolog 1 (Drosophila) [Source:MGI Symbol;Acc:MGI:2443157]	89	259	12.3505	26.4966	1.10124
ENSMUST00000093183	ENSMUST00000093183	MGI:1916826	Smco1	single-pass membrane protein with coiled-coil domains 1 [Source:MGI Symbol;Acc:MGI:1916826]	153	259	21.2318	26.4966	0.319582
ENSMUST00000114740	ENSMUST00000114740	MGI:2443598	Maats1	MYCBP-associated, testis expressed 1 [Source:MGI Symbol;Acc:MGI:2443598]	164	259	22.7582	26.4966	0.219418
ENSMUST00000106832	ENSMUST00000106832	MGI:2156057	Dclre1b	DNA cross-link repair 1B, PSO2 homolog (S. cerevisiae) [Source:MGI Symbol;Acc:MGI:2156057]	168	259	23.3133	26.4966	0.184652
ENSMUST00000151525	ENSMUST00000151525	MGI:107752	Myo1b	myosin IB [Source:MGI Symbol;Acc:MGI:107752]	177	259	24.5622	26.4966	0.109364
ENSMUST00000030121	ENSMUST00000030121	MGI:95705	B4galt1	UDP-Gal:betaGlcNAc beta 1,4- galactosyltransferase, polypeptide 1 [Source:MGI Symbol;Acc:MGI:95705]	73	258	10.1302	26.3943	1.38156
ENSMUST00000023829	ENSMUST00000023829	MGI:104556	Cdkn1a	cyclin-dependent kinase inhibitor 1A (P21) [Source:MGI Symbol;Acc:MGI:104556]	100	258	13.877	26.3943	0.927533
ENSMUST00000023555	ENSMUST00000023555	MGI:1913917	Hspbap1	Hspb associated protein 1 [Source:MGI Symbol;Acc:MGI:1913917]	118	258	16.3748	26.3943	0.688746
ENSMUST00000177346	ENSMUST00000177346	MGI:2445031	Sik2	salt inducible kinase 2 [Source:MGI Symbol;Acc:MGI:2445031]	234	258	32.4721	26.3943	-0.298976
ENSMUST00000070635	ENSMUST00000070635	MGI:103072	Zyx	zyxin [Source:MGI Symbol;Acc:MGI:103072]	63	257	8.74249	26.292	1.58851
ENSMUST00000038107	ENSMUST00000038107	MGI:1306784	Cited2	Cbp/p300-interacting transactivator, with Glu/Asp-rich carboxy-terminal domain, 2 [Source:MGI Symbol;Acc:MGI:1306784]	75	257	10.4077	26.292	1.33697
ENSMUST00000046425	ENSMUST00000046425	MGI:105968	Txlna	taxilin alpha [Source:MGI Symbol;Acc:MGI:105968]	113	257	15.681	26.292	0.745607
ENSMUST00000181180	ENSMUST00000181180		AC164431.1		171	257	23.7296	26.292	0.147934
ENSMUST00000100775	ENSMUST00000100775	MGI:1316678	Rad1	RAD1 homolog (S. pombe) [Source:MGI Symbol;Acc:MGI:1316678]	204	257	28.309	26.292	-0.106639
ENSMUST00000145438	ENSMUST00000145438	MGI:1924222	2810008D09Rik	RIKEN cDNA 2810008D09 gene [Source:MGI Symbol;Acc:MGI:1924222]	98	256	13.5994	26.1897	0.945452
ENSMUST00000173078	ENSMUST00000173078	MGI:1098801	Otud4	OTU domain containing 4 [Source:MGI Symbol;Acc:MGI:1098801]	113	256	15.681	26.1897	0.739983
ENSMUST00000092834	ENSMUST00000092834	MGI:1354742	Synrg	synergin, gamma [Source:MGI Symbol;Acc:MGI:1354742]	115	256	15.9585	26.1897	0.714672
ENSMUST00000180609	ENSMUST00000180609		AC113124.1		139	256	19.289	26.1897	0.441221
ENSMUST00000133063	ENSMUST00000133063	MGI:1860490	Uevld	UEV and lactate/malate dehyrogenase domains [Source:MGI Symbol;Acc:MGI:1860490]	157	256	21.7868	26.1897	0.265541
ENSMUST00000064454	ENSMUST00000064454	MGI:2444248	Gcn1l1	GCN1 general control of amino-acid synthesis 1-like 1 (yeast) [Source:MGI Symbol;Acc:MGI:2444248]	215	256	29.8355	26.1897	-0.188031
ENSMUST00000033800	ENSMUST00000033800	MGI:97623	Plp1	proteolipid protein (myelin) 1 [Source:MGI Symbol;Acc:MGI:97623]	265	256	36.774	26.1897	-0.489687
ENSMUST00000065398	ENSMUST00000065398	MGI:1095411	Nup214	nucleoporin 214 [Source:MGI Symbol;Acc:MGI:1095411]	92	255	12.7668	26.0874	1.03095
ENSMUST00000113959	ENSMUST00000113959	MGI:101758	Pet2	plasmacytoma expressed transcript 2 [Source:MGI Symbol;Acc:MGI:101758]	163	255	22.6195	26.0874	0.205787
ENSMUST00000020640	ENSMUST00000020640	MGI:101849	Gnb2l1	guanine nucleotide binding protein (G protein), beta polypeptide 2 like 1 [Source:MGI Symbol;Acc:MGI:101849]	172	255	23.8684	26.0874	0.12825
ENSMUST00000179285	ENSMUST00000179285	MGI:2448443	Hist4h4	histone cluster 4, H4 [Source:MGI Symbol;Acc:MGI:2448443]	222	255	30.8069	26.0874	-0.239901
ENSMUST00000108789	ENSMUST00000108789	MGI:2685478	Znf512b	zinc finger protein 512B [Source:MGI Symbol;Acc:MGI:2685478]	103	254	14.2933	25.9851	0.862346
ENSMUST00000009885	ENSMUST00000009885	MGI:104889	Ubp1	upstream binding protein 1 [Source:MGI Symbol;Acc:MGI:104889]	123	254	17.0687	25.9851	0.606332
ENSMUST00000134535	ENSMUST00000134535	MGI:1916599	1700008O03Rik	RIKEN cDNA 1700008O03 gene [Source:MGI Symbol;Acc:MGI:1916599]	126	254	17.485	25.9851	0.571566
ENSMUST00000095899	ENSMUST00000095899	MGI:1927152	Syne1	spectrin repeat containing, nuclear envelope 1 [Source:MGI Symbol;Acc:MGI:1927152]	131	254	18.1788	25.9851	0.515423
ENSMUST00000181349	ENSMUST00000181349	MGI:2445054	Senp1	SUMO1/sentrin specific peptidase 1 [Source:MGI Symbol;Acc:MGI:2445054]	138	254	19.1502	25.9851	0.440322
ENSMUST00000175239	ENSMUST00000175239	MGI:5455011	Gm25234	predicted gene, 25234 [Source:MGI Symbol;Acc:MGI:5455011]	142	254	19.7053	25.9851	0.399099
ENSMUST00000131780	ENSMUST00000131780	MGI:1914193	Pqlc1	PQ loop repeat containing 1 [Source:MGI Symbol;Acc:MGI:1914193]	145	254	20.1216	25.9851	0.368937
ENSMUST00000128582	ENSMUST00000128582	MGI:2443386	Dnajc11	DnaJ (Hsp40) homolog, subfamily C, member 11 [Source:MGI Symbol;Acc:MGI:2443386]	155	254	21.5093	25.9851	0.272722
ENSMUST00000053681	ENSMUST00000053681	MGI:2442704	Frrs1l	ferric-chelate reductase 1 like [Source:MGI Symbol;Acc:MGI:2442704]	189	254	26.2275	25.9851	-0.0133961
ENSMUST00000013773	ENSMUST00000013773	MGI:1916969	Cad	carbamoyl-phosphate synthetase 2, aspartate transcarbamylase, and dihydroorotase [Source:MGI Symbol;Acc:MGI:1916969]	214	254	29.6967	25.9851	-0.192621
ENSMUST00000178895	ENSMUST00000178895	MGI:3704208	Gm9821	predicted gene 9821 [Source:MGI Symbol;Acc:MGI:3704208]	84	253	11.6567	25.8828	1.15084
ENSMUST00000035057	ENSMUST00000035057	MGI:1203524	Smarcc1	SWI/SNF related, matrix associated, actin dependent regulator of chromatin, subfamily c, member 1 [Source:MGI Symbol;Acc:MGI:1203524]	93	253	12.9056	25.8828	1.004
ENSMUST00000012587	ENSMUST00000012587	MGI:1098231	Kif11	kinesin family member 11 [Source:MGI Symbol;Acc:MGI:1098231]	95	253	13.1831	25.8828	0.9733
ENSMUST00000175425	ENSMUST00000175425	MGI:5451959	Gm22182	predicted gene, 22182 [Source:MGI Symbol;Acc:MGI:5451959]	124	253	17.2074	25.8828	0.588959
ENSMUST00000038053	ENSMUST00000038053	MGI:2441849	Lpp	LIM domain containing preferred translocation partner in lipoma [Source:MGI Symbol;Acc:MGI:2441849]	138	253	19.1502	25.8828	0.434631
ENSMUST00000023226	ENSMUST00000023226	MGI:1277961	Plec	plectin [Source:MGI Symbol;Acc:MGI:1277961]	170	253	23.5909	25.8828	0.133764
ENSMUST00000079568	ENSMUST00000079568	MGI:3708717	Gm10025	predicted gene 10025 [Source:MGI Symbol;Acc:MGI:3708717]	223	253	30.9456	25.8828	-0.257745
ENSMUST00000040531	ENSMUST00000040531	MGI:2448542	Samd4b	sterile alpha motif domain containing 4B [Source:MGI Symbol;Acc:MGI:2448542]	56	252	7.7711	25.7805	1.73009
ENSMUST00000032737	ENSMUST00000032737	MGI:1330305	Trpm1	transient receptor potential cation channel, subfamily M, member 1 [Source:MGI Symbol;Acc:MGI:1330305]	123	252	17.0687	25.7805	0.594927
ENSMUST00000181866	ENSMUST00000181866		AC152410.1		133	252	18.4564	25.7805	0.482159
ENSMUST00000099684	ENSMUST00000099684	MGI:3641656	Gm10801	predicted gene 10801 [Source:MGI Symbol;Acc:MGI:3641656]	394	252	54.6753	25.7805	-1.08461
ENSMUST00000139151	ENSMUST00000139151	MGI:1916528	3110002H16Rik	RIKEN cDNA 3110002H16 gene [Source:MGI Symbol;Acc:MGI:1916528]	92	251	12.7668	25.6782	1.00814
ENSMUST00000169476	ENSMUST00000169476	MGI:2684848	Cyb5d2	cytochrome b5 domain containing 2 [Source:MGI Symbol;Acc:MGI:2684848]	129	251	17.9013	25.6782	0.520478
ENSMUST00000032591	ENSMUST00000032591	MGI:99157	Zfp12	zinc finger protein 12 [Source:MGI Symbol;Acc:MGI:99157]	131	251	18.1788	25.6782	0.498282
ENSMUST00000038980	ENSMUST00000038980	MGI:2153272	Trrap	transformation/transcription domain-associated protein [Source:MGI Symbol;Acc:MGI:2153272]	141	251	19.5665	25.6782	0.392154
ENSMUST00000080795	ENSMUST00000080795	MGI:3645522	Gm5607	predicted gene 5607 [Source:MGI Symbol;Acc:MGI:3645522]	161	251	22.3419	25.6782	0.200788
ENSMUST00000179054	ENSMUST00000179054	MGI:2442914	E030030I06Rik	RIKEN cDNA E030030I06 gene [Source:MGI Symbol;Acc:MGI:2442914]	207	251	28.7253	25.6782	-0.161782
ENSMUST00000161592	ENSMUST00000161592	MGI:1913516	Eapp	E2F-associated phosphoprotein [Source:MGI Symbol;Acc:MGI:1913516]	142	250	19.7053	25.5759	0.376199
ENSMUST00000056191	ENSMUST00000056191	MGI:2446229	Tet3	tet methylcytosine dioxygenase 3 [Source:MGI Symbol;Acc:MGI:2446229]	149	250	20.6767	25.5759	0.306777
ENSMUST00000154755	ENSMUST00000154755	MGI:2444681	Hhat	hedgehog acyltransferase [Source:MGI Symbol;Acc:MGI:2444681]	178	250	24.701	25.5759	0.0502125
ENSMUST00000181199	ENSMUST00000181199		AL627077.1		201	250	27.8927	25.5759	-0.125106
ENSMUST00000077730	ENSMUST00000077730	MGI:2685045	Pik3c2b	phosphoinositide-3-kinase, class 2, beta polypeptide [Source:MGI Symbol;Acc:MGI:2685045]	267	250	37.0515	25.5759	-0.53475
ENSMUST00000110157	ENSMUST00000110157	MGI:2181363	Prokr2	prokineticin receptor 2 [Source:MGI Symbol;Acc:MGI:2181363]	359	250	49.8183	25.5759	-0.961894
ENSMUST00000165495	ENSMUST00000165495	MGI:2141981	E430018J23Rik	RIKEN cDNA E430018J23 gene [Source:MGI Symbol;Acc:MGI:2141981]	399	250	55.3691	25.5759	-1.1143
ENSMUST00000032413	ENSMUST00000032413	MGI:1922570	Etnk1	ethanolamine kinase 1 [Source:MGI Symbol;Acc:MGI:1922570]	91	249	12.628	25.4736	1.01237
ENSMUST00000020484	ENSMUST00000020484	MGI:1354175	Txnrd1	thioredoxin reductase 1 [Source:MGI Symbol;Acc:MGI:1354175]	93	249	12.9056	25.4736	0.981005
ENSMUST00000006825	ENSMUST00000006825	MGI:1859637	Nphs1	nephrosis 1 homolog, nephrin (human) [Source:MGI Symbol;Acc:MGI:1859637]	164	249	22.7582	25.4736	0.162612
ENSMUST00000026084	ENSMUST00000026084	MGI:106677	Slc18a2	solute carrier family 18 (vesicular monoamine), member 2 [Source:MGI Symbol;Acc:MGI:106677]	170	249	23.5909	25.4736	0.110773
ENSMUST00000020023	ENSMUST00000020023	MGI:88930	Reep3	receptor accessory protein 3 [Source:MGI Symbol;Acc:MGI:88930]	96	248	13.3219	25.3712	0.929395
ENSMUST00000142677	ENSMUST00000142677	MGI:101825	Tango2	transport and golgi organization 2 [Source:MGI Symbol;Acc:MGI:101825]	134	248	18.5951	25.3712	0.448269
ENSMUST00000172807	ENSMUST00000172807	MGI:1913660	Mterfd1	MTERF domain containing 1 [Source:MGI Symbol;Acc:MGI:1913660]	147	248	20.3991	25.3712	0.314686
ENSMUST00000108718	ENSMUST00000108718	MGI:2384931	Dhrs7b	dehydrogenase/reductase (SDR family) member 7B [Source:MGI Symbol;Acc:MGI:2384931]	152	248	21.093	25.3712	0.26643
ENSMUST00000121440	ENSMUST00000121440	MGI:2389461	Maml3	mastermind like 3 (Drosophila) [Source:MGI Symbol;Acc:MGI:2389461]	96	247	13.3219	25.2689	0.923566
ENSMUST00000133353	ENSMUST00000133353	MGI:1928378	Dhodh	dihydroorotate dehydrogenase [Source:MGI Symbol;Acc:MGI:1928378]	108	247	14.9871	25.2689	0.753641
ENSMUST00000062915	ENSMUST00000062915	MGI:2443429	Gdpgp1	GDP-D-glucose phosphorylase 1 [Source:MGI Symbol;Acc:MGI:2443429]	120	247	16.6524	25.2689	0.601638
ENSMUST00000042365	ENSMUST00000042365	MGI:1916812	Cdk13	cyclin-dependent kinase 13 [Source:MGI Symbol;Acc:MGI:1916812]	129	247	17.9013	25.2689	0.497302
ENSMUST00000107772	ENSMUST00000107772	MGI:3039624	Tstd2	thiosulfate sulfurtransferase (rhodanese)-like domain containing 2 [Source:MGI Symbol;Acc:MGI:3039624]	134	247	18.5951	25.2689	0.44244
ENSMUST00000129591	ENSMUST00000129591	MGI:1914143	Vps9d1	VPS9 domain containing 1 [Source:MGI Symbol;Acc:MGI:1914143]	137	247	19.0115	25.2689	0.410497
ENSMUST00000057910	ENSMUST00000057910	MGI:1914182	Rexo1	REX1, RNA exonuclease 1 homolog (S. cerevisiae) [Source:MGI Symbol;Acc:MGI:1914182]	187	247	25.9499	25.2689	-0.0383656
ENSMUST00000028403	ENSMUST00000028403	MGI:2654575	Cybrd1	cytochrome b reductase 1 [Source:MGI Symbol;Acc:MGI:2654575]	111	246	15.4034	25.1666	0.70826
ENSMUST00000176464	ENSMUST00000176464	MGI:1346056	Ctage5	CTAGE family, member 5 [Source:MGI Symbol;Acc:MGI:1346056]	120	246	16.6524	25.1666	0.595786
ENSMUST00000029932	ENSMUST00000029932	MGI:1316732	Clca1	chloride channel calcium activated 1 [Source:MGI Symbol;Acc:MGI:1316732]	138	246	19.1502	25.1666	0.394152
ENSMUST00000107563	ENSMUST00000107563	MGI:3028577	Arl5c	ADP-ribosylation factor-like 5C [Source:MGI Symbol;Acc:MGI:3028577]	139	246	19.289	25.1666	0.383735
ENSMUST00000122293	ENSMUST00000122293	MGI:3802125	Gm14849	predicted gene 14849 [Source:MGI Symbol;Acc:MGI:3802125]	143	246	19.8441	25.1666	0.342805
ENSMUST00000001451	ENSMUST00000001451	MGI:2447364	Smg5	Smg-5 homolog, nonsense mediated mRNA decay factor (C. elegans) [Source:MGI Symbol;Acc:MGI:2447364]	150	246	20.8155	25.1666	0.273857
ENSMUST00000111557	ENSMUST00000111557	MGI:2444273	Dennd5b	DENN/MADD domain containing 5B [Source:MGI Symbol;Acc:MGI:2444273]	155	246	21.5093	25.1666	0.226552
ENSMUST00000040772	ENSMUST00000040772	MGI:2147790	Fermt3	fermitin family homolog 3 (Drosophila) [Source:MGI Symbol;Acc:MGI:2147790]	156	246	21.6481	25.1666	0.217274
ENSMUST00000042391	ENSMUST00000042391	MGI:3584513	Fdxacb1	ferredoxin-fold anticodon binding domain containing 1 [Source:MGI Symbol;Acc:MGI:3584513]	185	246	25.6724	25.1666	-0.0287053
ENSMUST00000156934	ENSMUST00000156934	MGI:1920188	Hspb11	heat shock protein family B (small), member 11 [Source:MGI Symbol;Acc:MGI:1920188]	202	246	28.0315	25.1666	-0.155535
ENSMUST00000061242	ENSMUST00000061242	MGI:99431	Arf1	ADP-ribosylation factor 1 [Source:MGI Symbol;Acc:MGI:99431]	82	245	11.3791	25.0643	1.13925
ENSMUST00000059580	ENSMUST00000059580	MGI:1915206	Setd8	SET domain containing (lysine methyltransferase) 8 [Source:MGI Symbol;Acc:MGI:1915206]	86	245	11.9342	25.0643	1.07053
ENSMUST00000096246	ENSMUST00000096246	MGI:1097667	Ganab	alpha glucosidase 2 alpha neutral subunit [Source:MGI Symbol;Acc:MGI:1097667]	102	245	14.1545	25.0643	0.824374
ENSMUST00000023806	ENSMUST00000023806	MGI:1332226	Soat2	sterol O-acyltransferase 2 [Source:MGI Symbol;Acc:MGI:1332226]	116	245	16.0973	25.0643	0.638819
ENSMUST00000113107	ENSMUST00000113107	MGI:1915724	Tada3	transcriptional adaptor 3 [Source:MGI Symbol;Acc:MGI:1915724]	124	245	17.2074	25.0643	0.542603
ENSMUST00000139678	ENSMUST00000139678	MGI:98941	Vwf	Von Willebrand factor homolog [Source:MGI Symbol;Acc:MGI:98941]	169	245	23.4521	25.0643	0.0959201
ENSMUST00000082517	ENSMUST00000082517	MGI:3819494	Snora23	small nucleolar RNA, H/ACA box 23 [Source:MGI Symbol;Acc:MGI:3819494]	71	244	9.85265	24.962	1.34115
ENSMUST00000181506	ENSMUST00000181506		AL714024.1		148	244	20.5379	24.962	0.281446
ENSMUST00000075406	ENSMUST00000075406	MGI:3033336	Szt2	seizure threshold 2 [Source:MGI Symbol;Acc:MGI:3033336]	156	244	21.6481	24.962	0.205497
ENSMUST00000051293	ENSMUST00000051293	MGI:1933113	Gpr146	G protein-coupled receptor 146 [Source:MGI Symbol;Acc:MGI:1933113]	67	243	9.29757	24.8597	1.41888
ENSMUST00000076136	ENSMUST00000076136	MGI:2683054	Fnip2	folliculin interacting protein 2 [Source:MGI Symbol;Acc:MGI:2683054]	111	243	15.4034	24.8597	0.690558
ENSMUST00000021381	ENSMUST00000021381	MGI:1100514	Pnn	pinin [Source:MGI Symbol;Acc:MGI:1100514]	120	243	16.6524	24.8597	0.578084
ENSMUST00000169485	ENSMUST00000169485	MGI:3028576	Dhx37	DEAH (Asp-Glu-Ala-His) box polypeptide 37 [Source:MGI Symbol;Acc:MGI:3028576]	138	243	19.1502	24.8597	0.37645
ENSMUST00000033583	ENSMUST00000033583	MGI:1914325	Magt1	magnesium transporter 1 [Source:MGI Symbol;Acc:MGI:1914325]	147	243	20.3991	24.8597	0.285302
ENSMUST00000131887	ENSMUST00000131887	MGI:1196391	Pole	polymerase (DNA directed), epsilon [Source:MGI Symbol;Acc:MGI:1196391]	152	243	21.093	24.8597	0.237047
ENSMUST00000083331	ENSMUST00000083331	MGI:5453232	Gm23455	predicted gene, 23455 [Source:MGI Symbol;Acc:MGI:5453232]	104	242	14.4321	24.7574	0.778585
ENSMUST00000023673	ENSMUST00000023673	MGI:99852	Runx1	runt related transcription factor 1 [Source:MGI Symbol;Acc:MGI:99852]	106	242	14.7096	24.7574	0.751104
ENSMUST00000053959	ENSMUST00000053959	MGI:1202397	Ints6	integrator complex subunit 6 [Source:MGI Symbol;Acc:MGI:1202397]	113	242	15.681	24.7574	0.658846
ENSMUST00000073337	ENSMUST00000073337	MGI:1930190	Cramp1l	Crm, cramped-like (Drosophila) [Source:MGI Symbol;Acc:MGI:1930190]	115	242	15.9585	24.7574	0.633535
ENSMUST00000045151	ENSMUST00000045151	MGI:2443411	Cd300a	CD300A antigen [Source:MGI Symbol;Acc:MGI:2443411]	235	242	32.6109	24.7574	-0.397492
ENSMUST00000032185	ENSMUST00000032185	MGI:98488	Slc6a6	solute carrier family 6 (neurotransmitter transporter, taurine), member 6 [Source:MGI Symbol;Acc:MGI:98488]	69	241	9.57511	24.6551	1.36453
ENSMUST00000028607	ENSMUST00000028607	MGI:1858234	Caprin1	cell cycle associated protein 1 [Source:MGI Symbol;Acc:MGI:1858234]	98	241	13.5994	24.6551	0.858341
ENSMUST00000152826	ENSMUST00000152826	MGI:2444506	Mbtps2	membrane-bound transcription factor peptidase, site 2 [Source:MGI Symbol;Acc:MGI:2444506]	109	241	15.1259	24.6551	0.704867
ENSMUST00000010807	ENSMUST00000010807	MGI:1923517	Fads1	fatty acid desaturase 1 [Source:MGI Symbol;Acc:MGI:1923517]	114	241	15.8197	24.6551	0.640161
ENSMUST00000097718	ENSMUST00000097718	MGI:3027003	Ino80d	INO80 complex subunit D [Source:MGI Symbol;Acc:MGI:3027003]	115	241	15.9585	24.6551	0.627561
ENSMUST00000091628	ENSMUST00000091628	MGI:104783	Atxn1	ataxin 1 [Source:MGI Symbol;Acc:MGI:104783]	130	241	18.0401	24.6551	0.450683
ENSMUST00000025375	ENSMUST00000025375	MGI:1926421	Tcerg1	transcription elongation regulator 1 (CA150) [Source:MGI Symbol;Acc:MGI:1926421]	178	241	24.701	24.6551	-0.00268248
ENSMUST00000130441	ENSMUST00000130441	MGI:2685553	Prdm11	PR domain containing 11 [Source:MGI Symbol;Acc:MGI:2685553]	186	241	25.8112	24.6551	-0.0661079
ENSMUST00000025563	ENSMUST00000025563	MGI:95588	Fth1	ferritin heavy chain 1 [Source:MGI Symbol;Acc:MGI:95588]	203	241	28.1703	24.6551	-0.192285
ENSMUST00000145783	ENSMUST00000145783	MGI:1353510	Arhgef1	Rho guanine nucleotide exchange factor (GEF) 1 [Source:MGI Symbol;Acc:MGI:1353510]	47	240	6.52218	24.5528	1.91246
ENSMUST00000166282	ENSMUST00000166282	MGI:1914583	Stk35	serine/threonine kinase 35 [Source:MGI Symbol;Acc:MGI:1914583]	72	240	9.99142	24.5528	1.29713
ENSMUST00000020123	ENSMUST00000020123	MGI:106920	Tmpo	thymopoietin [Source:MGI Symbol;Acc:MGI:106920]	125	240	17.3462	24.5528	0.501268
ENSMUST00000052135	ENSMUST00000052135	MGI:894835	Rbbp6	retinoblastoma binding protein 6 [Source:MGI Symbol;Acc:MGI:894835]	155	240	21.5093	24.5528	0.190928
ENSMUST00000162145	ENSMUST00000162145	MGI:1916679	Me3	malic enzyme 3, NADP(+)-dependent, mitochondrial [Source:MGI Symbol;Acc:MGI:1916679]	197	240	27.3376	24.5528	-0.155
ENSMUST00000052248	ENSMUST00000052248	MGI:1914410	Eef1g	eukaryotic translation elongation factor 1 gamma [Source:MGI Symbol;Acc:MGI:1914410]	259	240	35.9414	24.5528	-0.549756
ENSMUST00000033158	ENSMUST00000033158	MGI:107301	Ubfd1	ubiquitin family domain containing 1 [Source:MGI Symbol;Acc:MGI:107301]	57	239	7.90987	24.4505	1.62814
ENSMUST00000068519	ENSMUST00000068519	MGI:2444661	4933426M11Rik	RIKEN cDNA 4933426M11 gene [Source:MGI Symbol;Acc:MGI:2444661]	66	239	9.1588	24.4505	1.41663
ENSMUST00000099396	ENSMUST00000099396	MGI:3513266	Nt5dc3	5'-nucleotidase domain containing 3 [Source:MGI Symbol;Acc:MGI:3513266]	72	239	9.99142	24.4505	1.2911
ENSMUST00000095228	ENSMUST00000095228	MGI:2142433	Samd1	sterile alpha motif domain containing 1 [Source:MGI Symbol;Acc:MGI:2142433]	72	239	9.99142	24.4505	1.2911
ENSMUST00000084030	ENSMUST00000084030	MGI:2443510	Tacc1	transforming, acidic coiled-coil containing protein 1 [Source:MGI Symbol;Acc:MGI:2443510]	87	239	12.073	24.4505	1.01808
ENSMUST00000037285	ENSMUST00000037285	MGI:1927140	Git1	G protein-coupled receptor kinase-interactor 1 [Source:MGI Symbol;Acc:MGI:1927140]	92	239	12.7668	24.4505	0.937466
ENSMUST00000062804	ENSMUST00000062804	MGI:1858901	Fut8	fucosyltransferase 8 [Source:MGI Symbol;Acc:MGI:1858901]	116	239	16.0973	24.4505	0.603047
ENSMUST00000080919	ENSMUST00000080919	MGI:2442637	Thrap3	thyroid hormone receptor associated protein 3 [Source:MGI Symbol;Acc:MGI:2442637]	117	239	16.2361	24.4505	0.590664
ENSMUST00000036004	ENSMUST00000036004	MGI:104820	Hnrnpa1	heterogeneous nuclear ribonucleoprotein A1 [Source:MGI Symbol;Acc:MGI:104820]	123	239	17.0687	24.4505	0.518514
ENSMUST00000077783	ENSMUST00000077783	MGI:1915614	0610030E20Rik	RIKEN cDNA 0610030E20 gene [Source:MGI Symbol;Acc:MGI:1915614]	170	239	23.5909	24.4505	0.0516375
ENSMUST00000075666	ENSMUST00000075666	MGI:107995	Upf1	UPF1 regulator of nonsense transcripts homolog (yeast) [Source:MGI Symbol;Acc:MGI:107995]	175	239	24.2847	24.4505	0.00981731
ENSMUST00000055704	ENSMUST00000055704	MGI:95772	Gnai2	guanine nucleotide binding protein (G protein), alpha inhibiting 2 [Source:MGI Symbol;Acc:MGI:95772]	91	238	12.628	24.3482	0.947185
ENSMUST00000181252	ENSMUST00000181252		AC133578.2		134	238	18.5951	24.3482	0.38889
ENSMUST00000093360	ENSMUST00000093360	MGI:2384849	Tnpo2	transportin 2 (importin 3, karyopherin beta 2b) [Source:MGI Symbol;Acc:MGI:2384849]	139	238	19.289	24.3482	0.336038
ENSMUST00000067252	ENSMUST00000067252	MGI:3603204	Piezo1	piezo-type mechanosensitive ion channel component 1 [Source:MGI Symbol;Acc:MGI:3603204]	191	238	26.505	24.3482	-0.122449
ENSMUST00000170060	ENSMUST00000170060	MGI:1920055	Zfp839	zinc finger protein 839 [Source:MGI Symbol;Acc:MGI:1920055]	251	238	34.8312	24.3482	-0.516564
ENSMUST00000073961	ENSMUST00000073961	MGI:97813	Ptpre	protein tyrosine phosphatase, receptor type, E [Source:MGI Symbol;Acc:MGI:97813]	119	237	16.5136	24.2459	0.554087
ENSMUST00000006667	ENSMUST00000006667	MGI:1921808	Gvin1	GTPase, very large interferon inducible 1 [Source:MGI Symbol;Acc:MGI:1921808]	188	237	26.0887	24.2459	-0.105684
ENSMUST00000056924	ENSMUST00000056924	MGI:1933165	Plagl2	pleiomorphic adenoma gene-like 2 [Source:MGI Symbol;Acc:MGI:1933165]	66	236	9.1588	24.1436	1.39841
ENSMUST00000030768	ENSMUST00000030768	MGI:109239	Kcnab2	potassium voltage-gated channel, shaker-related subfamily, beta member 2 [Source:MGI Symbol;Acc:MGI:109239]	68	236	9.43634	24.1436	1.35534
ENSMUST00000127984	ENSMUST00000127984	MGI:1338013	Cbfa2t3	core-binding factor, runt domain, alpha subunit 2, translocated to, 3 (human) [Source:MGI Symbol;Acc:MGI:1338013]	70	236	9.71388	24.1436	1.31352
ENSMUST00000049863	ENSMUST00000049863	MGI:2153207	Pofut1	protein O-fucosyltransferase 1 [Source:MGI Symbol;Acc:MGI:2153207]	96	236	13.3219	24.1436	0.857842
ENSMUST00000038627	ENSMUST00000038627	MGI:104854	Zfp91	zinc finger protein 91 [Source:MGI Symbol;Acc:MGI:104854]	109	236	15.1259	24.1436	0.67462
ENSMUST00000140740	ENSMUST00000140740	MGI:1346869	Map2k4	mitogen-activated protein kinase kinase 4 [Source:MGI Symbol;Acc:MGI:1346869]	109	236	15.1259	24.1436	0.67462
ENSMUST00000075724	ENSMUST00000075724	MGI:1333865	Rfxank	regulatory factor X-associated ankyrin-containing protein [Source:MGI Symbol;Acc:MGI:1333865]	161	236	22.3419	24.1436	0.111888
ENSMUST00000030136	ENSMUST00000030136	MGI:1314647	Aqp7	aquaporin 7 [Source:MGI Symbol;Acc:MGI:1314647]	178	236	24.701	24.1436	-0.0329288
ENSMUST00000018691	ENSMUST00000018691	MGI:1934234	Pip4k2b	phosphatidylinositol-5-phosphate 4-kinase, type II, beta [Source:MGI Symbol;Acc:MGI:1934234]	62	235	8.60372	24.0413	1.48248
ENSMUST00000143214	ENSMUST00000143214	MGI:1914668	Ppil4	peptidylprolyl isomerase (cyclophilin)-like 4 [Source:MGI Symbol;Acc:MGI:1914668]	137	235	19.0115	24.0413	0.338646
ENSMUST00000114900	ENSMUST00000114900	MGI:1926031	Zc3hav1	zinc finger CCCH type, antiviral 1 [Source:MGI Symbol;Acc:MGI:1926031]	144	235	19.9828	24.0413	0.266754
ENSMUST00000166105	ENSMUST00000166105	MGI:4937249	Gm17615	predicted gene, 17615 [Source:MGI Symbol;Acc:MGI:4937249]	357	235	49.5408	24.0413	-1.0431
ENSMUST00000027286	ENSMUST00000027286	MGI:1923428	Coa5	cytochrome C oxidase assembly factor 5 [Source:MGI Symbol;Acc:MGI:1923428]	61	234	8.46495	23.939	1.49979
ENSMUST00000129257	ENSMUST00000129257	MGI:103040	Rsu1	Ras suppressor protein 1 [Source:MGI Symbol;Acc:MGI:103040]	70	234	9.71388	23.939	1.30124
ENSMUST00000033004	ENSMUST00000033004	MGI:105367	Il4ra	interleukin 4 receptor, alpha [Source:MGI Symbol;Acc:MGI:105367]	78	234	10.824	23.939	1.14512
ENSMUST00000056907	ENSMUST00000056907	MGI:2444720	Smcr8	Smith-Magenis syndrome chromosome region, candidate 8 homolog (human) [Source:MGI Symbol;Acc:MGI:2444720]	119	234	16.5136	23.939	0.535709
ENSMUST00000040599	ENSMUST00000040599	MGI:2183683	Nav1	neuron navigator 1 [Source:MGI Symbol;Acc:MGI:2183683]	121	234	16.7911	23.939	0.511663
ENSMUST00000046349	ENSMUST00000046349	MGI:1916046	Tmem214	transmembrane protein 214 [Source:MGI Symbol;Acc:MGI:1916046]	133	234	18.4564	23.939	0.375244
ENSMUST00000080036	ENSMUST00000080036	MGI:96067	Htt	huntingtin [Source:MGI Symbol;Acc:MGI:96067]	178	234	24.701	23.939	-0.0452071
ENSMUST00000039627	ENSMUST00000039627	MGI:2450877	Bzrap1	benzodiazepine receptor associated protein 1 [Source:MGI Symbol;Acc:MGI:2450877]	104	233	14.4321	23.8367	0.723908
ENSMUST00000134594	ENSMUST00000134594	MGI:2443010	Lman2l	lectin, mannose-binding 2-like [Source:MGI Symbol;Acc:MGI:2443010]	133	233	18.4564	23.8367	0.369065
ENSMUST00000181538	ENSMUST00000181538		AC163347.1		141	233	19.5665	23.8367	0.284796
ENSMUST00000030765	ENSMUST00000030765	MGI:1338892	Padi2	peptidyl arginine deiminase, type II [Source:MGI Symbol;Acc:MGI:1338892]	149	233	20.6767	23.8367	0.205179
ENSMUST00000091259	ENSMUST00000091259	MGI:3040688	Slc7a14	solute carrier family 7 (cationic amino acid transporter, y+ system), member 14 [Source:MGI Symbol;Acc:MGI:3040688]	151	233	20.9542	23.8367	0.185943
ENSMUST00000034074	ENSMUST00000034074	MGI:2136825	N4bp1	NEDD4 binding protein 1 [Source:MGI Symbol;Acc:MGI:2136825]	60	232	8.32618	23.7344	1.51125
ENSMUST00000065263	ENSMUST00000065263	MGI:2384298	Sbno1	sno, strawberry notch homolog 1 (Drosophila) [Source:MGI Symbol;Acc:MGI:2384298]	91	232	12.628	23.7344	0.910348
ENSMUST00000102678	ENSMUST00000102678	MGI:95957	H2-T23	histocompatibility 2, T region locus 23 [Source:MGI Symbol;Acc:MGI:95957]	100	232	13.877	23.7344	0.774286
ENSMUST00000007980	ENSMUST00000007980	MGI:1924384	Hnrnpa0	heterogeneous nuclear ribonucleoprotein A0 [Source:MGI Symbol;Acc:MGI:1924384]	103	232	14.2933	23.7344	0.731642
ENSMUST00000136582	ENSMUST00000136582	MGI:1330239	Dpm1	dolichol-phosphate (beta-D) mannosyltransferase 1 [Source:MGI Symbol;Acc:MGI:1330239]	124	232	17.2074	23.7344	0.463946
ENSMUST00000081650	ENSMUST00000081650	MGI:1351605	Rpl3	ribosomal protein L3 [Source:MGI Symbol;Acc:MGI:1351605]	169	232	23.4521	23.7344	0.0172632
ENSMUST00000072607	ENSMUST00000072607	MGI:1915760	Ints1	integrator complex subunit 1 [Source:MGI Symbol;Acc:MGI:1915760]	196	232	27.1989	23.7344	-0.196567
ENSMUST00000180558	ENSMUST00000180558		AC165259.1		214	232	29.6967	23.7344	-0.323324
ENSMUST00000130416	ENSMUST00000130416	MGI:3651878	Gm13936	predicted gene 13936 [Source:MGI Symbol;Acc:MGI:3651878]	331	232	45.9328	23.7344	-0.952545
ENSMUST00000027559	ENSMUST00000027559	MGI:1314891	Tnfrsf11a	tumor necrosis factor receptor superfamily, member 11a [Source:MGI Symbol;Acc:MGI:1314891]	359	232	49.8183	23.7344	-1.0697
ENSMUST00000046717	ENSMUST00000046717	MGI:1352483	Mga	MAX gene associated [Source:MGI Symbol;Acc:MGI:1352483]	115	231	15.9585	23.6321	0.566421
ENSMUST00000149886	ENSMUST00000149886	MGI:1932557	Letm1	leucine zipper-EF-hand containing transmembrane protein 1 [Source:MGI Symbol;Acc:MGI:1932557]	120	231	16.6524	23.6321	0.50502
ENSMUST00000120639	ENSMUST00000120639	MGI:2444817	C530008M17Rik	RIKEN cDNA C530008M17 gene [Source:MGI Symbol;Acc:MGI:2444817]	127	231	17.6238	23.6321	0.423226
ENSMUST00000005041	ENSMUST00000005041	MGI:98886	U2af2	U2 small nuclear ribonucleoprotein auxiliary factor (U2AF) 2 [Source:MGI Symbol;Acc:MGI:98886]	129	231	17.9013	23.6321	0.400683
ENSMUST00000181751	ENSMUST00000181751		AC092404.1		129	231	17.9013	23.6321	0.400683
ENSMUST00000023165	ENSMUST00000023165	MGI:1098280	Crebbp	CREB binding protein [Source:MGI Symbol;Acc:MGI:1098280]	132	231	18.3176	23.6321	0.367517
ENSMUST00000043161	ENSMUST00000043161	MGI:1919002	Gtf3c2	general transcription factor IIIC, polypeptide 2, beta [Source:MGI Symbol;Acc:MGI:1919002]	156	231	21.6481	23.6321	0.126508
ENSMUST00000090933	ENSMUST00000090933	MGI:2183158	Ash1l	ash1 (absent, small, or homeotic)-like (Drosophila) [Source:MGI Symbol;Acc:MGI:2183158]	177	231	24.5622	23.6321	-0.0556949
ENSMUST00000067695	ENSMUST00000067695	MGI:107699	Usp17la	ubiquitin specific peptidase 17-like A [Source:MGI Symbol;Acc:MGI:107699]	354	231	49.1245	23.6321	-1.05569
ENSMUST00000020490	ENSMUST00000020490	MGI:1924555	Wdr82	WD repeat domain containing 82 [Source:MGI Symbol;Acc:MGI:1924555]	48	230	6.66095	23.5298	1.82069
ENSMUST00000063988	ENSMUST00000063988	MGI:2441730	Tbl1xr1	transducin (beta)-like 1X-linked receptor 1 [Source:MGI Symbol;Acc:MGI:2441730]	69	230	9.57511	23.5298	1.29713
ENSMUST00000161760	ENSMUST00000161760	MGI:1918699	Mettl13	methyltransferase like 13 [Source:MGI Symbol;Acc:MGI:1918699]	98	230	13.5994	23.5298	0.790942
ENSMUST00000087871	ENSMUST00000087871	MGI:95777	Gnas	GNAS (guanine nucleotide binding protein, alpha stimulating) complex locus [Source:MGI Symbol;Acc:MGI:95777]	101	230	14.0157	23.5298	0.74744
ENSMUST00000181146	ENSMUST00000181146		AL592169.1		101	230	14.0157	23.5298	0.74744
ENSMUST00000099090	ENSMUST00000099090	MGI:1919283	Tsc22d2	TSC22 domain family, member 2 [Source:MGI Symbol;Acc:MGI:1919283]	115	230	15.9585	23.5298	0.560162
ENSMUST00000047873	ENSMUST00000047873	MGI:1353510	Arhgef1	Rho guanine nucleotide exchange factor (GEF) 1 [Source:MGI Symbol;Acc:MGI:1353510]	125	230	17.3462	23.5298	0.439867
ENSMUST00000052932	ENSMUST00000052932	MGI:2443226	Pde12	phosphodiesterase 12 [Source:MGI Symbol;Acc:MGI:2443226]	128	230	17.7625	23.5298	0.405652
ENSMUST00000175423	ENSMUST00000175423	MGI:5452770	Gm22993	predicted gene, 22993 [Source:MGI Symbol;Acc:MGI:5452770]	134	230	18.5951	23.5298	0.339562
ENSMUST00000130243	ENSMUST00000130243	MGI:1926884	Huwe1	HECT, UBA and WWE domain containing 1 [Source:MGI Symbol;Acc:MGI:1926884]	187	230	25.9499	23.5298	-0.141243
ENSMUST00000045761	ENSMUST00000045761	MGI:2656976	Lzts3	leucine zipper, putative tumor suppressor family member 3 [Source:MGI Symbol;Acc:MGI:2656976]	235	230	32.6109	23.5298	-0.470865
ENSMUST00000158588	ENSMUST00000158588	MGI:5453165	Gm23388	predicted gene, 23388 [Source:MGI Symbol;Acc:MGI:5453165]	270	230	37.4678	23.5298	-0.671164
ENSMUST00000131802	ENSMUST00000131802	MGI:104808	Lcp1	lymphocyte cytosolic protein 1 [Source:MGI Symbol;Acc:MGI:104808]	37	229	5.13448	23.4275	2.18991
ENSMUST00000066601	ENSMUST00000066601	MGI:108030	Hyou1	hypoxia up-regulated 1 [Source:MGI Symbol;Acc:MGI:108030]	70	229	9.71388	23.4275	1.27008
ENSMUST00000046502	ENSMUST00000046502	MGI:1933196	Rad54l2	RAD54 like 2 (S. cerevisiae) [Source:MGI Symbol;Acc:MGI:1933196]	76	229	10.5465	23.4275	1.15144
ENSMUST00000127775	ENSMUST00000127775	MGI:1918238	4931428L18Rik	RIKEN cDNA 4931428L18 gene [Source:MGI Symbol;Acc:MGI:1918238]	82	229	11.3791	23.4275	1.04181
ENSMUST00000072334	ENSMUST00000072334	MGI:892995	Dnajc5	DnaJ (Hsp40) homolog, subfamily C, member 5 [Source:MGI Symbol;Acc:MGI:892995]	100	229	13.877	23.4275	0.755509
ENSMUST00000044189	ENSMUST00000044189	MGI:2445054	Senp1	SUMO1/sentrin specific peptidase 1 [Source:MGI Symbol;Acc:MGI:2445054]	105	229	14.5708	23.4275	0.68512
ENSMUST00000019405	ENSMUST00000019405	MGI:2443304	Map1s	microtubule-associated protein 1S [Source:MGI Symbol;Acc:MGI:2443304]	117	229	16.2361	23.4275	0.529001
ENSMUST00000129123	ENSMUST00000129123	MGI:2443764	Iqcb1	IQ calmodulin-binding motif containing 1 [Source:MGI Symbol;Acc:MGI:2443764]	117	229	16.2361	23.4275	0.529001
ENSMUST00000014499	ENSMUST00000014499	MGI:103097	Anapc1	anaphase promoting complex subunit 1 [Source:MGI Symbol;Acc:MGI:103097]	127	229	17.6238	23.4275	0.410681
ENSMUST00000182032	ENSMUST00000182032	MGI:1914289	Rbm25	RNA binding motif protein 25 [Source:MGI Symbol;Acc:MGI:1914289]	143	229	19.8441	23.4275	0.239494
ENSMUST00000068056	ENSMUST00000068056	MGI:99240	Ddx39b	DEAD (Asp-Glu-Ala-Asp) box polypeptide 39B [Source:MGI Symbol;Acc:MGI:99240]	153	229	21.2318	23.4275	0.141978
ENSMUST00000031341	ENSMUST00000031341	MGI:1202069	Cdk2ap1	CDK2 (cyclin-dependent kinase 2)-associated protein 1 [Source:MGI Symbol;Acc:MGI:1202069]	68	228	9.43634	23.3252	1.30559
ENSMUST00000082864	ENSMUST00000082864	MGI:4422058	n-R5s193	nuclear encoded rRNA 5S 193 [Source:MGI Symbol;Acc:MGI:4422058]	113	228	15.681	23.3252	0.572873
ENSMUST00000040583	ENSMUST00000040583	MGI:2444133	Heatr5a	HEAT repeat containing 5A [Source:MGI Symbol;Acc:MGI:2444133]	138	228	19.1502	23.3252	0.284527
ENSMUST00000146537	ENSMUST00000146537	MGI:87859	Abl1	c-abl oncogene 1, non-receptor tyrosine kinase [Source:MGI Symbol;Acc:MGI:87859]	149	228	20.6767	23.3252	0.173883
ENSMUST00000097177	ENSMUST00000097177	MGI:1921152	Psmb11	proteasome (prosome, macropain) subunit, beta type, 11 [Source:MGI Symbol;Acc:MGI:1921152]	176	228	24.4235	23.3252	-0.06638
ENSMUST00000172442	ENSMUST00000172442	MGI:1353498	Slc25a3	solute carrier family 25 (mitochondrial carrier, phosphate carrier), member 3 [Source:MGI Symbol;Acc:MGI:1353498]	92	227	12.7668	23.2229	0.863148
ENSMUST00000094053	ENSMUST00000094053	MGI:2385292	Tnrc6a	trinucleotide repeat containing 6a [Source:MGI Symbol;Acc:MGI:2385292]	134	227	18.5951	23.2229	0.320621
ENSMUST00000181328	ENSMUST00000181328		AC137156.1		146	227	20.2604	23.2229	0.196886
ENSMUST00000031734	ENSMUST00000031734	MGI:1917193	Lrch4	leucine-rich repeats and calponin homology (CH) domain containing 4 [Source:MGI Symbol;Acc:MGI:1917193]	66	226	9.1588	23.1206	1.33595
ENSMUST00000115120	ENSMUST00000115120	MGI:1858308	Tnk2	tyrosine kinase, non-receptor, 2 [Source:MGI Symbol;Acc:MGI:1858308]	75	226	10.4077	23.1206	1.15152
ENSMUST00000159899	ENSMUST00000159899	MGI:1913863	Pigk	phosphatidylinositol glycan anchor biosynthesis, class K [Source:MGI Symbol;Acc:MGI:1913863]	81	226	11.2403	23.1206	1.04049
ENSMUST00000176793	ENSMUST00000176793	MGI:1353499	Baz1b	bromodomain adjacent to zinc finger domain, 1B [Source:MGI Symbol;Acc:MGI:1353499]	103	226	14.2933	23.1206	0.69384
ENSMUST00000003468	ENSMUST00000003468	MGI:95818	Grik5	glutamate receptor, ionotropic, kainate 5 (gamma 2) [Source:MGI Symbol;Acc:MGI:95818]	117	226	16.2361	23.1206	0.509976
ENSMUST00000052138	ENSMUST00000052138	MGI:1929871	Terf2ip	telomeric repeat binding factor 2, interacting protein [Source:MGI Symbol;Acc:MGI:1929871]	120	226	16.6524	23.1206	0.47345
ENSMUST00000003310	ENSMUST00000003310	MGI:894323	Ranbp2	RAN binding protein 2 [Source:MGI Symbol;Acc:MGI:894323]	129	226	17.9013	23.1206	0.369113
ENSMUST00000042251	ENSMUST00000042251	MGI:1913334	Rmnd1	required for meiotic nuclear division 1 homolog (S. cerevisiae) [Source:MGI Symbol;Acc:MGI:1913334]	132	226	18.3176	23.1206	0.335946
ENSMUST00000093902	ENSMUST00000093902	MGI:1289196	Rnf213	ring finger protein 213 [Source:MGI Symbol;Acc:MGI:1289196]	149	226	20.6767	23.1206	0.161172
ENSMUST00000018645	ENSMUST00000018645	MGI:1349717	Ncor1	nuclear receptor co-repressor 1 [Source:MGI Symbol;Acc:MGI:1349717]	150	226	20.8155	23.1206	0.151522
ENSMUST00000146484	ENSMUST00000146484	MGI:1930751	Trpc4ap	transient receptor potential cation channel, subfamily C, member 4 associated protein [Source:MGI Symbol;Acc:MGI:1930751]	182	226	25.2561	23.1206	-0.127454
ENSMUST00000077879	ENSMUST00000077879	MGI:2444207	Vps13c	vacuolar protein sorting 13C (yeast) [Source:MGI Symbol;Acc:MGI:2444207]	228	226	31.6395	23.1206	-0.452549
ENSMUST00000043305	ENSMUST00000043305	MGI:2685541	Wdtc1	WD and tetratricopeptide repeats 1 [Source:MGI Symbol;Acc:MGI:2685541]	46	225	6.38341	23.0183	1.85038
ENSMUST00000174566	ENSMUST00000174566	MGI:97891	Rfc1	replication factor C (activator 1) 1 [Source:MGI Symbol;Acc:MGI:97891]	120	225	16.6524	23.0183	0.467052
ENSMUST00000170927	ENSMUST00000170927	MGI:1351328	Dbf4	DBF4 homolog (S. cerevisiae) [Source:MGI Symbol;Acc:MGI:1351328]	132	225	18.3176	23.0183	0.329549
ENSMUST00000175201	ENSMUST00000175201	MGI:5453175	Gm23398	predicted gene, 23398 [Source:MGI Symbol;Acc:MGI:5453175]	159	225	22.0644	23.0183	0.0610598
ENSMUST00000109848	ENSMUST00000109848	MGI:104630	Wars	tryptophanyl-tRNA synthetase [Source:MGI Symbol;Acc:MGI:104630]	33	224	4.5794	22.916	2.32312
ENSMUST00000044638	ENSMUST00000044638	MGI:1923396	Stx16	syntaxin 16 [Source:MGI Symbol;Acc:MGI:1923396]	73	224	10.1302	22.916	1.17769
ENSMUST00000025053	ENSMUST00000025053	MGI:1927238	Mllt1	myeloid/lymphoid or mixed-lineage leukemia (trithorax homolog, Drosophila); translocated to, 1 [Source:MGI Symbol;Acc:MGI:1927238]	90	224	12.4893	22.916	0.875663
ENSMUST00000001258	ENSMUST00000001258	MGI:1338889	Uhrf1	ubiquitin-like, containing PHD and RING finger domains, 1 [Source:MGI Symbol;Acc:MGI:1338889]	110	224	15.2647	22.916	0.586157
ENSMUST00000056433	ENSMUST00000056433	MGI:2139054	Gpr107	G protein-coupled receptor 107 [Source:MGI Symbol;Acc:MGI:2139054]	110	224	15.2647	22.916	0.586157
ENSMUST00000053042	ENSMUST00000053042	MGI:2387181	Zbtb8b	zinc finger and BTB domain containing 8b [Source:MGI Symbol;Acc:MGI:2387181]	111	224	15.4034	22.916	0.573101
ENSMUST00000166004	ENSMUST00000166004	MGI:2683541	Mast3	microtubule associated serine/threonine kinase 3 [Source:MGI Symbol;Acc:MGI:2683541]	129	224	17.9013	22.916	0.356289
ENSMUST00000134221	ENSMUST00000134221	MGI:1918698	Tmem80	transmembrane protein 80 [Source:MGI Symbol;Acc:MGI:1918698]	146	224	20.2604	22.916	0.177692
ENSMUST00000102919	ENSMUST00000102919	MGI:99606	Abca2	ATP-binding cassette, sub-family A (ABC1), member 2 [Source:MGI Symbol;Acc:MGI:99606]	150	224	20.8155	22.916	0.138698
ENSMUST00000171797	ENSMUST00000171797	MGI:1855693	Nap1l1	nucleosome assembly protein 1-like 1 [Source:MGI Symbol;Acc:MGI:1855693]	189	224	26.2275	22.916	-0.194726
ENSMUST00000003622	ENSMUST00000003622	MGI:1345283	Slc25a1	solute carrier family 25 (mitochondrial carrier, citrate transporter), member 1 [Source:MGI Symbol;Acc:MGI:1345283]	41	223	5.68956	22.8137	2.00351
ENSMUST00000133808	ENSMUST00000133808	MGI:1924939	C330006A16Rik	RIKEN cDNA C330006A16 gene [Source:MGI Symbol;Acc:MGI:1924939]	58	223	8.04864	22.8137	1.50308
ENSMUST00000024981	ENSMUST00000024981	MGI:1196260	Hn1l	hematological and neurological expressed 1-like [Source:MGI Symbol;Acc:MGI:1196260]	61	223	8.46495	22.8137	1.43032
ENSMUST00000025667	ENSMUST00000025667	MGI:1339970	Rtn3	reticulon 3 [Source:MGI Symbol;Acc:MGI:1339970]	74	223	10.269	22.8137	1.15161
ENSMUST00000017620	ENSMUST00000017620	MGI:1923275	Cant1	calcium activated nucleotidase 1 [Source:MGI Symbol;Acc:MGI:1923275]	84	223	11.6567	22.8137	0.968744
ENSMUST00000011526	ENSMUST00000011526	MGI:1919005	Dhdh	dihydrodiol dehydrogenase (dimeric) [Source:MGI Symbol;Acc:MGI:1919005]	117	223	16.2361	22.8137	0.490697
ENSMUST00000013807	ENSMUST00000013807	MGI:109583	Pten	phosphatase and tensin homolog [Source:MGI Symbol;Acc:MGI:109583]	119	223	16.5136	22.8137	0.466244
ENSMUST00000175302	ENSMUST00000175302	MGI:5456230	Gm26453	predicted gene, 26453 [Source:MGI Symbol;Acc:MGI:5456230]	156	223	21.6481	22.8137	0.0756593
ENSMUST00000071739	ENSMUST00000071739	MGI:2152453	Gsk3a	glycogen synthase kinase 3 alpha [Source:MGI Symbol;Acc:MGI:2152453]	65	222	9.02003	22.7114	1.33221
ENSMUST00000076615	ENSMUST00000076615	MGI:2142523	Crtc1	CREB regulated transcription coactivator 1 [Source:MGI Symbol;Acc:MGI:2142523]	68	222	9.43634	22.7114	1.26711
ENSMUST00000152101	ENSMUST00000152101	MGI:1916023	Zc3hc1	zinc finger, C3HC type 1 [Source:MGI Symbol;Acc:MGI:1916023]	127	222	17.6238	22.7114	0.365893
ENSMUST00000061169	ENSMUST00000061169	MGI:3617843	Gal3st3	galactose-3-O-sulfotransferase 3 [Source:MGI Symbol;Acc:MGI:3617843]	133	222	18.4564	22.7114	0.299295
ENSMUST00000045628	ENSMUST00000045628	MGI:1924814	R3hdm4	R3H domain containing 4 [Source:MGI Symbol;Acc:MGI:1924814]	48	221	6.66095	22.6091	1.7631
ENSMUST00000019482	ENSMUST00000019482	MGI:1925516	Zfp687	zinc finger protein 687 [Source:MGI Symbol;Acc:MGI:1925516]	108	221	14.9871	22.6091	0.593177
ENSMUST00000074002	ENSMUST00000074002	MGI:1891295	Ube3b	ubiquitin protein ligase E3B [Source:MGI Symbol;Acc:MGI:1891295]	116	221	16.0973	22.6091	0.490083
ENSMUST00000083153	ENSMUST00000083153	MGI:1933385	Snord22	small nucleolar RNA, C/D box 22 [Source:MGI Symbol;Acc:MGI:1933385]	120	221	16.6524	22.6091	0.441174
ENSMUST00000175122	ENSMUST00000175122	MGI:5455255	Gm25478	predicted gene, 25478 [Source:MGI Symbol;Acc:MGI:5455255]	135	221	18.7339	22.6091	0.271249
ENSMUST00000005705	ENSMUST00000005705	MGI:109274	Trim28	tripartite motif-containing 28 [Source:MGI Symbol;Acc:MGI:109274]	145	221	20.1216	22.6091	0.168155
ENSMUST00000105845	ENSMUST00000105845	MGI:99611	Ephb2	Eph receptor B2 [Source:MGI Symbol;Acc:MGI:99611]	155	221	21.5093	22.6091	0.0719398
ENSMUST00000018449	ENSMUST00000018449	MGI:2179381	Prpf8	pre-mRNA processing factor 8 [Source:MGI Symbol;Acc:MGI:2179381]	179	221	24.8398	22.6091	-0.135752
ENSMUST00000026269	ENSMUST00000026269	MGI:1352502	Limd1	LIM domains containing 1 [Source:MGI Symbol;Acc:MGI:1352502]	56	220	7.7711	22.5068	1.53417
ENSMUST00000107353	ENSMUST00000107353	MGI:2443541	Zfp592	zinc finger protein 592 [Source:MGI Symbol;Acc:MGI:2443541]	68	220	9.43634	22.5068	1.25406
ENSMUST00000032114	ENSMUST00000032114	MGI:1929872	Mogs	mannosyl-oligosaccharide glucosidase [Source:MGI Symbol;Acc:MGI:1929872]	91	220	12.628	22.5068	0.833727
ENSMUST00000057195	ENSMUST00000057195	MGI:1351500	Nup62	nucleoporin 62 [Source:MGI Symbol;Acc:MGI:1351500]	93	220	12.9056	22.5068	0.802363
ENSMUST00000017065	ENSMUST00000017065	MGI:1915246	Srsf6	serine/arginine-rich splicing factor 6 [Source:MGI Symbol;Acc:MGI:1915246]	118	220	16.3748	22.5068	0.458878
ENSMUST00000131391	ENSMUST00000131391	MGI:97138	Mpv17	MpV17 mitochondrial inner membrane protein [Source:MGI Symbol;Acc:MGI:97138]	136	220	18.8727	22.5068	0.254058
ENSMUST00000094977	ENSMUST00000094977	MGI:3701985	Gm13288	predicted gene 13288 [Source:MGI Symbol;Acc:MGI:3701985]	148	220	20.5379	22.5068	0.132068
ENSMUST00000146141	ENSMUST00000146141	MGI:1274784	Gpr98	G protein-coupled receptor 98 [Source:MGI Symbol;Acc:MGI:1274784]	148	220	20.5379	22.5068	0.132068
ENSMUST00000137581	ENSMUST00000137581	MGI:109489	Snrpc	U1 small nuclear ribonucleoprotein C [Source:MGI Symbol;Acc:MGI:109489]	153	220	21.2318	22.5068	0.0841335
ENSMUST00000079510	ENSMUST00000079510	MGI:106417	Cherp	calcium homeostasis endoplasmic reticulum protein [Source:MGI Symbol;Acc:MGI:106417]	118	219	16.3748	22.4044	0.452306
ENSMUST00000021698	ENSMUST00000021698	MGI:96250	Hsp90aa1	heat shock protein 90, alpha (cytosolic), class A member 1 [Source:MGI Symbol;Acc:MGI:96250]	147	219	20.3991	22.4044	0.135276
ENSMUST00000159692	ENSMUST00000159692	MGI:106250	Ermp1	endoplasmic reticulum metallopeptidase 1 [Source:MGI Symbol;Acc:MGI:106250]	154	219	21.3705	22.4044	0.0681621
ENSMUST00000017572	ENSMUST00000017572	MGI:1916327	Psmd11	proteasome (prosome, macropain) 26S subunit, non-ATPase, 11 [Source:MGI Symbol;Acc:MGI:1916327]	50	218	6.93849	22.3021	1.68449
ENSMUST00000109986	ENSMUST00000109986	MGI:3036245	Ralgapa2	Ral GTPase activating protein, alpha subunit 2 (catalytic) [Source:MGI Symbol;Acc:MGI:3036245]	85	218	11.7954	22.3021	0.918955
ENSMUST00000161781	ENSMUST00000161781	MGI:98497	Tbxas1	thromboxane A synthase 1, platelet [Source:MGI Symbol;Acc:MGI:98497]	95	218	13.1831	22.3021	0.75849
ENSMUST00000159572	ENSMUST00000159572	MGI:2147434	Nmrk1	nicotinamide riboside kinase 1 [Source:MGI Symbol;Acc:MGI:2147434]	102	218	14.1545	22.3021	0.655921
ENSMUST00000043396	ENSMUST00000043396	MGI:97357	Mycn	v-myc myelocytomatosis viral related oncogene, neuroblastoma derived (avian) [Source:MGI Symbol;Acc:MGI:97357]	108	218	14.9871	22.3021	0.573458
ENSMUST00000026699	ENSMUST00000026699	MGI:1351638	Mkln1	muskelin 1, intracellular mediator containing kelch motifs [Source:MGI Symbol;Acc:MGI:1351638]	113	218	15.681	22.3021	0.508167
ENSMUST00000180951	ENSMUST00000180951		AC136746.1		119	218	16.5136	22.3021	0.433528
ENSMUST00000100237	ENSMUST00000100237	MGI:105044	Ttf1	transcription termination factor, RNA polymerase I [Source:MGI Symbol;Acc:MGI:105044]	124	218	17.2074	22.3021	0.37415
ENSMUST00000179598	ENSMUST00000179598	MGI:3828086	Zbed6	zinc finger, BED domain containing 6 [Source:MGI Symbol;Acc:MGI:3828086]	162	218	22.4807	22.3021	-0.0115041
ENSMUST00000001179	ENSMUST00000001179	MGI:102722	Pcnt	pericentrin (kendrin) [Source:MGI Symbol;Acc:MGI:102722]	193	218	26.7826	22.3021	-0.264111
ENSMUST00000022698	ENSMUST00000022698	MGI:1332623	Dok2	docking protein 2 [Source:MGI Symbol;Acc:MGI:1332623]	70	217	9.71388	22.1998	1.19243
ENSMUST00000160583	ENSMUST00000160583	MGI:2444236	Ubn2	ubinuclein 2 [Source:MGI Symbol;Acc:MGI:2444236]	115	217	15.9585	22.1998	0.476223
ENSMUST00000176296	ENSMUST00000176296	MGI:3041186	B130034C11Rik	RIKEN cDNA B130034C11 gene [Source:MGI Symbol;Acc:MGI:3041186]	120	217	16.6524	22.1998	0.414822
ENSMUST00000042561	ENSMUST00000042561	MGI:2442746	Slc43a2	solute carrier family 43, member 2 [Source:MGI Symbol;Acc:MGI:2442746]	129	217	17.9013	22.1998	0.310486
ENSMUST00000043311	ENSMUST00000043311	MGI:1917969	Hmha1	histocompatibility (minor) HA-1 [Source:MGI Symbol;Acc:MGI:1917969]	131	217	18.1788	22.1998	0.28829
ENSMUST00000038379	ENSMUST00000038379	MGI:1917826	Cpsf7	cleavage and polyadenylation specific factor 7 [Source:MGI Symbol;Acc:MGI:1917826]	140	217	19.4278	22.1998	0.19243
ENSMUST00000180690	ENSMUST00000180690		AC130841.1		151	217	20.9542	22.1998	0.0833081
ENSMUST00000109054	ENSMUST00000109054	MGI:3652324	Gm14443	predicted gene 14443 [Source:MGI Symbol;Acc:MGI:3652324]	154	217	21.3705	22.1998	0.0549263
ENSMUST00000161912	ENSMUST00000161912	MGI:103040	Rsu1	Ras suppressor protein 1 [Source:MGI Symbol;Acc:MGI:103040]	160	217	22.2032	22.1998	-0.000215251
ENSMUST00000095172	ENSMUST00000095172	MGI:1921690	Cmip	c-Maf inducing protein [Source:MGI Symbol;Acc:MGI:1921690]	41	216	5.68956	22.0975	1.9575
ENSMUST00000030541	ENSMUST00000030541	MGI:109369	Hp1bp3	heterochromatin protein 1, binding protein 3 [Source:MGI Symbol;Acc:MGI:109369]	72	216	9.99142	22.0975	1.14512
ENSMUST00000018274	ENSMUST00000018274	MGI:1355272	Csnk1d	casein kinase 1, delta [Source:MGI Symbol;Acc:MGI:1355272]	73	216	10.1302	22.0975	1.12522
ENSMUST00000034537	ENSMUST00000034537	MGI:1316743	St3gal4	ST3 beta-galactoside alpha-2,3-sialyltransferase 4 [Source:MGI Symbol;Acc:MGI:1316743]	77	216	10.6853	22.0975	1.04826
ENSMUST00000072237	ENSMUST00000072237	MGI:1355329	Mink1	misshapen-like kinase 1 (zebrafish) [Source:MGI Symbol;Acc:MGI:1355329]	81	216	11.2403	22.0975	0.975199
ENSMUST00000174164	ENSMUST00000174164	MGI:99240	Ddx39b	DEAD (Asp-Glu-Ala-Asp) box polypeptide 39B [Source:MGI Symbol;Acc:MGI:99240]	86	216	11.9342	22.0975	0.888784
ENSMUST00000057256	ENSMUST00000057256	MGI:1925127	6030458C11Rik	RIKEN cDNA 6030458C11 gene [Source:MGI Symbol;Acc:MGI:1925127]	92	216	12.7668	22.0975	0.791487
ENSMUST00000021803	ENSMUST00000021803	MGI:2385621	Nup153	nucleoporin 153 [Source:MGI Symbol;Acc:MGI:2385621]	103	216	14.2933	22.0975	0.628549
ENSMUST00000162505	ENSMUST00000162505	MGI:101838	Tbp	TATA box binding protein [Source:MGI Symbol;Acc:MGI:101838]	114	216	15.8197	22.0975	0.482159
ENSMUST00000097742	ENSMUST00000097742	MGI:2444329	Tmem88b	transmembrane protein 88B [Source:MGI Symbol;Acc:MGI:2444329]	127	216	17.6238	22.0975	0.326364
ENSMUST00000051704	ENSMUST00000051704	MGI:105313	Cit	citron [Source:MGI Symbol;Acc:MGI:105313]	148	216	20.5379	22.0975	0.105596
ENSMUST00000132994	ENSMUST00000132994	MGI:2441980	Caps2	calcyphosphine 2 [Source:MGI Symbol;Acc:MGI:2441980]	412	216	57.1731	22.0975	-1.37145
ENSMUST00000033429	ENSMUST00000033429	MGI:1928377	Elf4	E74-like factor 4 (ets domain transcription factor) [Source:MGI Symbol;Acc:MGI:1928377]	38	215	5.27325	21.9952	2.06043
ENSMUST00000173750	ENSMUST00000173750	MGI:104816	Hnrnpl	heterogeneous nuclear ribonucleoprotein L [Source:MGI Symbol;Acc:MGI:104816]	81	215	11.2403	21.9952	0.968504
ENSMUST00000096249	ENSMUST00000096249	MGI:1923578	Ints5	integrator complex subunit 5 [Source:MGI Symbol;Acc:MGI:1923578]	83	215	11.5179	21.9952	0.933315
ENSMUST00000036328	ENSMUST00000036328	MGI:2686934	Zfhx2	zinc finger homeobox 2 [Source:MGI Symbol;Acc:MGI:2686934]	86	215	11.9342	21.9952	0.88209
ENSMUST00000123128	ENSMUST00000123128	MGI:105976	Myo5a	myosin VA [Source:MGI Symbol;Acc:MGI:105976]	92	215	12.7668	21.9952	0.784793
ENSMUST00000156163	ENSMUST00000156163	MGI:1097158	Calu	calumenin [Source:MGI Symbol;Acc:MGI:1097158]	97	215	13.4607	21.9952	0.708442
ENSMUST00000123995	ENSMUST00000123995	MGI:95303	Eif4a1	eukaryotic translation initiation factor 4A1 [Source:MGI Symbol;Acc:MGI:95303]	102	215	14.1545	21.9952	0.635929
ENSMUST00000181286	ENSMUST00000181286		AC125373.1		158	215	21.9256	21.9952	0.00457371
ENSMUST00000102805	ENSMUST00000102805	MGI:3042847	Cd200r2	Cd200 receptor 2 [Source:MGI Symbol;Acc:MGI:3042847]	183	215	25.3949	21.9952	-0.207345
ENSMUST00000031895	ENSMUST00000031895	MGI:97295	Casp2	caspase 2 [Source:MGI Symbol;Acc:MGI:97295]	27	214	3.74678	21.8929	2.54674
ENSMUST00000182918	ENSMUST00000182918	MGI:1934030	Dleu2	deleted in lymphocytic leukemia, 2 [Source:MGI Symbol;Acc:MGI:1934030]	100	214	13.877	21.8929	0.657772
ENSMUST00000028964	ENSMUST00000028964	MGI:1344372	Rbck1	RanBP-type and C3HC4-type zinc finger containing 1 [Source:MGI Symbol;Acc:MGI:1344372]	100	214	13.877	21.8929	0.657772
ENSMUST00000033498	ENSMUST00000033498	MGI:1343176	Timm17b	translocase of inner mitochondrial membrane 17b [Source:MGI Symbol;Acc:MGI:1343176]	123	214	17.0687	21.8929	0.359114
ENSMUST00000043848	ENSMUST00000043848	MGI:1915548	Ncapd2	non-SMC condensin I complex, subunit D2 [Source:MGI Symbol;Acc:MGI:1915548]	128	214	17.7625	21.8929	0.301629
ENSMUST00000066652	ENSMUST00000066652	MGI:1924730	Kidins220	kinase D-interacting substrate 220 [Source:MGI Symbol;Acc:MGI:1924730]	128	214	17.7625	21.8929	0.301629
ENSMUST00000040907	ENSMUST00000040907	MGI:1347059	Decr2	2-4-dienoyl-Coenzyme A reductase 2, peroxisomal [Source:MGI Symbol;Acc:MGI:1347059]	145	214	20.1216	21.8929	0.12172
ENSMUST00000022378	ENSMUST00000022378	MGI:1354385	Ero1l	ERO1-like (S. cerevisiae) [Source:MGI Symbol;Acc:MGI:1354385]	55	213	7.63233	21.7906	1.51351
ENSMUST00000020637	ENSMUST00000020637	MGI:88261	Canx	calnexin [Source:MGI Symbol;Acc:MGI:88261]	63	213	8.74249	21.7906	1.31759
ENSMUST00000106113	ENSMUST00000106113	MGI:1916087	Foxk2	forkhead box K2 [Source:MGI Symbol;Acc:MGI:1916087]	96	213	13.3219	21.7906	0.709909
ENSMUST00000087517	ENSMUST00000087517	MGI:1344352	Dido1	death inducer-obliterator 1 [Source:MGI Symbol;Acc:MGI:1344352]	107	213	14.8484	21.7906	0.553404
ENSMUST00000147875	ENSMUST00000147875	MGI:1913524	Lyrm9	LYR motif containing 9 [Source:MGI Symbol;Acc:MGI:1913524]	111	213	15.4034	21.7906	0.500455
ENSMUST00000153446	ENSMUST00000153446	MGI:97513	Furin	furin (paired basic amino acid cleaving enzyme) [Source:MGI Symbol;Acc:MGI:97513]	117	213	16.2361	21.7906	0.424507
ENSMUST00000032909	ENSMUST00000032909	MGI:1333863	Pde3b	phosphodiesterase 3B, cGMP-inhibited [Source:MGI Symbol;Acc:MGI:1333863]	129	213	17.9013	21.7906	0.283644
ENSMUST00000131569	ENSMUST00000131569	MGI:1926027	Enthd2	ENTH domain containing 2 [Source:MGI Symbol;Acc:MGI:1926027]	136	213	18.8727	21.7906	0.207408
ENSMUST00000035519	ENSMUST00000035519	MGI:2654703	Otud7b	OTU domain containing 7B [Source:MGI Symbol;Acc:MGI:2654703]	149	213	20.6767	21.7906	0.0757027
ENSMUST00000078734	ENSMUST00000078734	MGI:2385206	Pabpc4	poly(A) binding protein, cytoplasmic 4 [Source:MGI Symbol;Acc:MGI:2385206]	158	213	21.9256	21.7906	-0.00890952
ENSMUST00000049248	ENSMUST00000049248	MGI:2445027	Malt1	mucosa associated lymphoid tissue lymphoma translocation gene 1 [Source:MGI Symbol;Acc:MGI:2445027]	168	213	23.3133	21.7906	-0.0974462
ENSMUST00000108214	ENSMUST00000108214	MGI:3612790	Klhl32	kelch-like 32 [Source:MGI Symbol;Acc:MGI:3612790]	169	213	23.4521	21.7906	-0.106008
ENSMUST00000126755	ENSMUST00000126755	MGI:2385908	Cpne5	copine V [Source:MGI Symbol;Acc:MGI:2385908]	174	213	24.1459	21.7906	-0.148072
ENSMUST00000098266	ENSMUST00000098266	MGI:99473	Arrb1	arrestin, beta 1 [Source:MGI Symbol;Acc:MGI:99473]	64	212	8.88126	21.6883	1.28808
ENSMUST00000032071	ENSMUST00000032071	MGI:1919352	Dusp11	dual specificity phosphatase 11 (RNA/RNP complex 1-interacting) [Source:MGI Symbol;Acc:MGI:1919352]	81	212	11.2403	21.6883	0.948232
ENSMUST00000049167	ENSMUST00000049167	MGI:1924057	Phf12	PHD finger protein 12 [Source:MGI Symbol;Acc:MGI:1924057]	94	212	13.0444	21.6883	0.733493
ENSMUST00000043707	ENSMUST00000043707	MGI:1915612	Rhbdd2	rhomboid domain containing 2 [Source:MGI Symbol;Acc:MGI:1915612]	103	212	14.2933	21.6883	0.601582
ENSMUST00000037644	ENSMUST00000037644	MGI:88279	Cbl	Casitas B-lineage lymphoma [Source:MGI Symbol;Acc:MGI:88279]	108	212	14.9871	21.6883	0.533195
ENSMUST00000091924	ENSMUST00000091924	MGI:1917120	Polr3gl	polymerase (RNA) III (DNA directed) polypeptide G like [Source:MGI Symbol;Acc:MGI:1917120]	113	212	15.681	21.6883	0.467903
ENSMUST00000123791	ENSMUST00000123791	MGI:1925230	Sbf1	SET binding factor 1 [Source:MGI Symbol;Acc:MGI:1925230]	115	212	15.9585	21.6883	0.442592
ENSMUST00000049185	ENSMUST00000049185	MGI:2656825	Ybey	ybeY metallopeptidase [Source:MGI Symbol;Acc:MGI:2656825]	188	212	26.0887	21.6883	-0.266507
ENSMUST00000160328	ENSMUST00000160328	MGI:3639495	Dok6	docking protein 6 [Source:MGI Symbol;Acc:MGI:3639495]	290	212	40.2432	21.6883	-0.891827
ENSMUST00000006628	ENSMUST00000006628	MGI:5439461	Gm21992	predicted gene 21992 [Source:MGI Symbol;Acc:MGI:5439461]	70	211	9.71388	21.586	1.15198
ENSMUST00000109308	ENSMUST00000109308	MGI:103296	Nfatc3	nuclear factor of activated T cells, cytoplasmic, calcineurin dependent 3 [Source:MGI Symbol;Acc:MGI:103296]	75	211	10.4077	21.586	1.05244
ENSMUST00000180086	ENSMUST00000180086	MGI:95893	H1f0	H1 histone family, member 0 [Source:MGI Symbol;Acc:MGI:95893]	83	211	11.5179	21.586	0.906221
ENSMUST00000054459	ENSMUST00000054459	MGI:1196277	Tmem201	transmembrane protein 201 [Source:MGI Symbol;Acc:MGI:1196277]	99	211	13.7382	21.586	0.651904
ENSMUST00000035164	ENSMUST00000035164	MGI:1920018	Topbp1	topoisomerase (DNA) II binding protein 1 [Source:MGI Symbol;Acc:MGI:1920018]	146	211	20.2604	21.586	0.0914362
ENSMUST00000143178	ENSMUST00000143178	MGI:1913926	Tmed7	transmembrane emp24 protein transport domain containing 7 [Source:MGI Symbol;Acc:MGI:1913926]	147	211	20.3991	21.586	0.0815885
ENSMUST00000155824	ENSMUST00000155824	MGI:97749	Ppia	peptidylprolyl isomerase A [Source:MGI Symbol;Acc:MGI:97749]	154	211	21.3705	21.586	0.0144743
ENSMUST00000136176	ENSMUST00000136176	MGI:1915509	Ift80	intraflagellar transport 80 [Source:MGI Symbol;Acc:MGI:1915509]	286	211	39.6881	21.586	-0.878611
ENSMUST00000037618	ENSMUST00000037618	MGI:96522	Rbpj	recombination signal binding protein for immunoglobulin kappa J region [Source:MGI Symbol;Acc:MGI:96522]	49	210	6.79972	21.4837	1.6597
ENSMUST00000027979	ENSMUST00000027979	MGI:1341908	Uhmk1	U2AF homology motif (UHM) kinase 1 [Source:MGI Symbol;Acc:MGI:1341908]	49	210	6.79972	21.4837	1.6597
ENSMUST00000115163	ENSMUST00000115163	MGI:2445095	Lrrc33	leucine rich repeat containing 33 [Source:MGI Symbol;Acc:MGI:2445095]	84	210	11.6567	21.4837	0.88209
ENSMUST00000110299	ENSMUST00000110299	MGI:98732	Tgm3	transglutaminase 3, E polypeptide [Source:MGI Symbol;Acc:MGI:98732]	101	210	14.0157	21.4837	0.616196
ENSMUST00000038448	ENSMUST00000038448	MGI:2442893	Tmprss11bnl	transmembrane protease, serine 11b N terminal like [Source:MGI Symbol;Acc:MGI:2442893]	112	210	15.5422	21.4837	0.467052
ENSMUST00000037064	ENSMUST00000037064	MGI:1914962	Slc25a37	solute carrier family 25, member 37 [Source:MGI Symbol;Acc:MGI:1914962]	125	210	17.3462	21.4837	0.308623
ENSMUST00000042779	ENSMUST00000042779	MGI:2442326	Zbtb1	zinc finger and BTB domain containing 1 [Source:MGI Symbol;Acc:MGI:2442326]	125	210	17.3462	21.4837	0.308623
ENSMUST00000119976	ENSMUST00000119976	MGI:1918775	Ankle1	ankyrin repeat and LEM domain containing 1 [Source:MGI Symbol;Acc:MGI:1918775]	126	210	17.485	21.4837	0.297127
ENSMUST00000001043	ENSMUST00000001043	MGI:1913761	Chtop	chromatin target of PRMT1 [Source:MGI Symbol;Acc:MGI:1913761]	66	209	9.1588	21.3814	1.22313
ENSMUST00000076091	ENSMUST00000076091	MGI:2684607	Ctf2	cardiotrophin 2 [Source:MGI Symbol;Acc:MGI:2684607]	96	209	13.3219	21.3814	0.682558
ENSMUST00000046266	ENSMUST00000046266	MGI:2685106	Elmsan1	ELM2 and Myb/SANT-like domain containing 1 [Source:MGI Symbol;Acc:MGI:2685106]	102	209	14.1545	21.3814	0.595095
ENSMUST00000063788	ENSMUST00000063788	MGI:1920345	Slc25a42	solute carrier family 25, member 42 [Source:MGI Symbol;Acc:MGI:1920345]	108	209	14.9871	21.3814	0.512633
ENSMUST00000153924	ENSMUST00000153924	MGI:1925861	Btbd19	BTB (POZ) domain containing 19 [Source:MGI Symbol;Acc:MGI:1925861]	116	209	16.0973	21.3814	0.40954
ENSMUST00000052885	ENSMUST00000052885	MGI:2177957	Tmem259	transmembrane protein 259 [Source:MGI Symbol;Acc:MGI:2177957]	118	209	16.3748	21.3814	0.384878
ENSMUST00000033513	ENSMUST00000033513	MGI:1859648	Ftsj1	FtsJ homolog 1 (E. coli) [Source:MGI Symbol;Acc:MGI:1859648]	125	209	17.3462	21.3814	0.301736
ENSMUST00000156279	ENSMUST00000156279	MGI:1914411	Sclt1	sodium channel and clathrin linker 1 [Source:MGI Symbol;Acc:MGI:1914411]	147	209	20.3991	21.3814	0.0678484
ENSMUST00000154972	ENSMUST00000154972	MGI:1928373	Dnajc7	DnaJ (Hsp40) homolog, subfamily C, member 7 [Source:MGI Symbol;Acc:MGI:1928373]	83	208	11.5179	21.2791	0.885562
ENSMUST00000025668	ENSMUST00000025668	MGI:1924270	Atl3	atlastin GTPase 3 [Source:MGI Symbol;Acc:MGI:1924270]	84	208	11.6567	21.2791	0.868284
ENSMUST00000006754	ENSMUST00000006754	MGI:98512	Ubtf	upstream binding transcription factor, RNA polymerase I [Source:MGI Symbol;Acc:MGI:98512]	93	208	12.9056	21.2791	0.721443
ENSMUST00000048421	ENSMUST00000048421	MGI:2385896	BC037034	cDNA sequence BC037034 [Source:MGI Symbol;Acc:MGI:2385896]	94	208	13.0444	21.2791	0.706012
ENSMUST00000027587	ENSMUST00000027587	MGI:1920199	Ccnt2	cyclin T2 [Source:MGI Symbol;Acc:MGI:1920199]	95	208	13.1831	21.2791	0.690746
ENSMUST00000056950	ENSMUST00000056950	MGI:2385708	Rin3	Ras and Rab interactor 3 [Source:MGI Symbol;Acc:MGI:2385708]	99	208	13.7382	21.2791	0.631245
ENSMUST00000182497	ENSMUST00000182497		RP24		109	208	15.1259	21.2791	0.492417
ENSMUST00000068387	ENSMUST00000068387	MGI:1276116	Ep300	E1A binding protein p300 [Source:MGI Symbol;Acc:MGI:1276116]	124	208	17.2074	21.2791	0.306405
ENSMUST00000109790	ENSMUST00000109790	MGI:2684063	Asxl1	additional sex combs like 1 [Source:MGI Symbol;Acc:MGI:2684063]	130	208	18.0401	21.2791	0.238234
ENSMUST00000033739	ENSMUST00000033739	MGI:1926249	Car5b	carbonic anhydrase 5b, mitochondrial [Source:MGI Symbol;Acc:MGI:1926249]	132	208	18.3176	21.2791	0.216207
ENSMUST00000181416	ENSMUST00000181416	MGI:97824	Pvt1	plasmacytoma variant translocation 1 [Source:MGI Symbol;Acc:MGI:97824]	154	208	21.3705	21.2791	-0.00618521
ENSMUST00000054289	ENSMUST00000054289	MGI:105110	Rps2	ribosomal protein S2 [Source:MGI Symbol;Acc:MGI:105110]	156	208	21.6481	21.2791	-0.0248009
ENSMUST00000053230	ENSMUST00000053230	MGI:1918992	Ulk3	unc-51-like kinase 3 [Source:MGI Symbol;Acc:MGI:1918992]	206	208	28.5866	21.2791	-0.425899
ENSMUST00000117399	ENSMUST00000117399	MGI:97167	Msn	moesin [Source:MGI Symbol;Acc:MGI:97167]	50	207	6.93849	21.1768	1.60979
ENSMUST00000009344	ENSMUST00000009344	MGI:2429950	Xpo6	exportin 6 [Source:MGI Symbol;Acc:MGI:2429950]	81	207	11.2403	21.1768	0.913799
ENSMUST00000145364	ENSMUST00000145364	MGI:106498	D4Wsu53e	DNA segment, Chr 4, Wayne State University 53, expressed [Source:MGI Symbol;Acc:MGI:106498]	84	207	11.6567	21.1768	0.861331
ENSMUST00000140837	ENSMUST00000140837	MGI:2154278	Ankrd6	ankyrin repeat domain 6 [Source:MGI Symbol;Acc:MGI:2154278]	101	207	14.0157	21.1768	0.595437
ENSMUST00000047179	ENSMUST00000047179	MGI:2670965	Zfp598	zinc finger protein 598 [Source:MGI Symbol;Acc:MGI:2670965]	107	207	14.8484	21.1768	0.512182
ENSMUST00000040280	ENSMUST00000040280	MGI:1914222	Slc25a23	solute carrier family 25 (mitochondrial carrier; phosphate carrier), member 23 [Source:MGI Symbol;Acc:MGI:1914222]	47	206	6.52218	21.0745	1.69207
ENSMUST00000102590	ENSMUST00000102590	MGI:1100836	Kpna6	karyopherin (importin) alpha 6 [Source:MGI Symbol;Acc:MGI:1100836]	52	206	7.21603	21.0745	1.54622
ENSMUST00000134065	ENSMUST00000134065	MGI:95560	Flt3l	FMS-like tyrosine kinase 3 ligand [Source:MGI Symbol;Acc:MGI:95560]	61	206	8.46495	21.0745	1.31592
ENSMUST00000000291	ENSMUST00000000291	MGI:109150	Mnt	max binding protein [Source:MGI Symbol;Acc:MGI:109150]	66	206	9.1588	21.0745	1.20227
ENSMUST00000060945	ENSMUST00000060945	MGI:2136171	Aff4	AF4/FMR2 family, member 4 [Source:MGI Symbol;Acc:MGI:2136171]	81	206	11.2403	21.0745	0.906812
ENSMUST00000165017	ENSMUST00000165017	MGI:1918019	Nolc1	nucleolar and coiled-body phosphoprotein 1 [Source:MGI Symbol;Acc:MGI:1918019]	86	206	11.9342	21.0745	0.820397
ENSMUST00000023507	ENSMUST00000023507	MGI:1861437	Gsk3b	glycogen synthase kinase 3 beta [Source:MGI Symbol;Acc:MGI:1861437]	105	206	14.5708	21.0745	0.532417
ENSMUST00000035346	ENSMUST00000035346	MGI:1918765	8430427H17Rik	RIKEN cDNA 8430427H17 gene [Source:MGI Symbol;Acc:MGI:1918765]	109	206	15.1259	21.0745	0.478478
ENSMUST00000057608	ENSMUST00000057608	MGI:2447899	Lrrc3	leucine rich repeat containing 3 [Source:MGI Symbol;Acc:MGI:2447899]	109	206	15.1259	21.0745	0.478478
ENSMUST00000141115	ENSMUST00000141115	MGI:2443265	Tnrc6c	trinucleotide repeat containing 6C [Source:MGI Symbol;Acc:MGI:2443265]	114	206	15.8197	21.0745	0.413772
ENSMUST00000084116	ENSMUST00000084116	MGI:1921285	Nol9	nucleolar protein 9 [Source:MGI Symbol;Acc:MGI:1921285]	115	206	15.9585	21.0745	0.401172
ENSMUST00000002603	ENSMUST00000002603	MGI:2145950	Scrib	scribbled homolog (Drosophila) [Source:MGI Symbol;Acc:MGI:2145950]	119	206	16.5136	21.0745	0.351844
ENSMUST00000126864	ENSMUST00000126864	MGI:104606	Rab34	RAB34, member of RAS oncogene family [Source:MGI Symbol;Acc:MGI:104606]	136	206	18.8727	21.0745	0.159199
ENSMUST00000056889	ENSMUST00000056889	MGI:1344380	Chd4	chromodomain helicase DNA binding protein 4 [Source:MGI Symbol;Acc:MGI:1344380]	163	206	22.6195	21.0745	-0.102066
ENSMUST00000001115	ENSMUST00000001115	MGI:1347078	Grk6	G protein-coupled receptor kinase 6 [Source:MGI Symbol;Acc:MGI:1347078]	81	205	11.2403	20.9722	0.899792
ENSMUST00000003461	ENSMUST00000003461	MGI:1098267	Ogdh	oxoglutarate (alpha-ketoglutarate) dehydrogenase (lipoamide) [Source:MGI Symbol;Acc:MGI:1098267]	85	205	11.7954	20.9722	0.830251
ENSMUST00000143182	ENSMUST00000143182	MGI:2441844	Tmem87a	transmembrane protein 87A [Source:MGI Symbol;Acc:MGI:2441844]	99	205	13.7382	20.9722	0.610285
ENSMUST00000134325	ENSMUST00000134325	MGI:1337056	Trim26	tripartite motif-containing 26 [Source:MGI Symbol;Acc:MGI:1337056]	109	205	15.1259	20.9722	0.471457
ENSMUST00000127521	ENSMUST00000127521	MGI:1917739	5730405O15Rik	RIKEN cDNA 5730405O15 gene [Source:MGI Symbol;Acc:MGI:1917739]	120	205	16.6524	20.9722	0.332751
ENSMUST00000088345	ENSMUST00000088345	MGI:1353598	Mapk8ip3	mitogen-activated protein kinase 8 interacting protein 3 [Source:MGI Symbol;Acc:MGI:1353598]	141	205	19.5665	20.9722	0.10009
ENSMUST00000069794	ENSMUST00000069794	MGI:1098622	Rif1	Rap1 interacting factor 1 homolog (yeast) [Source:MGI Symbol;Acc:MGI:1098622]	147	205	20.3991	20.9722	0.0399694
ENSMUST00000066496	ENSMUST00000066496	MGI:2144158	Nudcd3	NudC domain containing 3 [Source:MGI Symbol;Acc:MGI:2144158]	52	204	7.21603	20.8699	1.53215
ENSMUST00000026150	ENSMUST00000026150	MGI:1918335	Arhgap19	Rho GTPase activating protein 19 [Source:MGI Symbol;Acc:MGI:1918335]	53	204	7.3548	20.8699	1.50467
ENSMUST00000025350	ENSMUST00000025350	MGI:1917890	Dcp2	DCP2 decapping enzyme homolog (S. cerevisiae) [Source:MGI Symbol;Acc:MGI:1917890]	61	204	8.46495	20.8699	1.30185
ENSMUST00000049474	ENSMUST00000049474	MGI:1923041	Fbxw8	F-box and WD-40 domain protein 8 [Source:MGI Symbol;Acc:MGI:1923041]	73	204	10.1302	20.8699	1.04276
ENSMUST00000034703	ENSMUST00000034703	MGI:1913208	Carm1	coactivator-associated arginine methyltransferase 1 [Source:MGI Symbol;Acc:MGI:1913208]	79	204	10.9628	20.8699	0.928806
ENSMUST00000041124	ENSMUST00000041124	MGI:2180715	Zfp704	zinc finger protein 704 [Source:MGI Symbol;Acc:MGI:2180715]	84	204	11.6567	20.8699	0.84027
ENSMUST00000162198	ENSMUST00000162198	MGI:3708796	Gm10612	predicted gene 10612 [Source:MGI Symbol;Acc:MGI:3708796]	91	204	12.628	20.8699	0.724792
ENSMUST00000054547	ENSMUST00000054547	MGI:99511	Ptpn11	protein tyrosine phosphatase, non-receptor type 11 [Source:MGI Symbol;Acc:MGI:99511]	92	204	12.7668	20.8699	0.709025
ENSMUST00000022446	ENSMUST00000022446	MGI:1921677	Eaf1	ELL associated factor 1 [Source:MGI Symbol;Acc:MGI:1921677]	106	204	14.7096	20.8699	0.504666
ENSMUST00000138468	ENSMUST00000138468	MGI:1202301	Itch	itchy, E3 ubiquitin protein ligase [Source:MGI Symbol;Acc:MGI:1202301]	123	204	17.0687	20.8699	0.290072
ENSMUST00000070805	ENSMUST00000070805	MGI:1921915	Lrrc48	leucine rich repeat containing 48 [Source:MGI Symbol;Acc:MGI:1921915]	127	204	17.6238	20.8699	0.243902
ENSMUST00000076251	ENSMUST00000076251	MGI:2442656	Zfp865	zinc finger protein 865 [Source:MGI Symbol;Acc:MGI:2442656]	132	204	18.3176	20.8699	0.188193
ENSMUST00000005108	ENSMUST00000005108	MGI:2136980	Kdm5a	lysine (K)-specific demethylase 5A [Source:MGI Symbol;Acc:MGI:2136980]	133	204	18.4564	20.8699	0.177305
ENSMUST00000021001	ENSMUST00000021001	MGI:105066	Rab10	RAB10, member RAS oncogene family [Source:MGI Symbol;Acc:MGI:105066]	40	203	5.55079	20.7676	1.90357
ENSMUST00000039259	ENSMUST00000039259	MGI:3580016	Agap2	ArfGAP with GTPase domain, ankyrin repeat and PH domain 2 [Source:MGI Symbol;Acc:MGI:3580016]	64	203	8.88126	20.7676	1.2255
ENSMUST00000028190	ENSMUST00000028190	MGI:87859	Abl1	c-abl oncogene 1, non-receptor tyrosine kinase [Source:MGI Symbol;Acc:MGI:87859]	113	203	15.681	20.7676	0.405319
ENSMUST00000071935	ENSMUST00000071935	MGI:106624	Myo9b	myosin IXb [Source:MGI Symbol;Acc:MGI:106624]	121	203	16.7911	20.7676	0.306634
ENSMUST00000075510	ENSMUST00000075510	MGI:2146808	Safb2	scaffold attachment factor B2 [Source:MGI Symbol;Acc:MGI:2146808]	129	203	17.9013	20.7676	0.21427
ENSMUST00000124320	ENSMUST00000124320	MGI:3801901	Gm16222	predicted gene 16222 [Source:MGI Symbol;Acc:MGI:3801901]	132	203	18.3176	20.7676	0.181103
ENSMUST00000025831	ENSMUST00000025831	MGI:1921396	Dock8	dedicator of cytokinesis 8 [Source:MGI Symbol;Acc:MGI:1921396]	146	203	20.2604	20.7676	0.035673
ENSMUST00000099575	ENSMUST00000099575	MGI:1344337	Grem1	gremlin 1 [Source:MGI Symbol;Acc:MGI:1344337]	229	203	31.7783	20.7676	-0.613706
ENSMUST00000099047	ENSMUST00000099047	MGI:3641690	Gm10719	predicted gene 10719 [Source:MGI Symbol;Acc:MGI:3641690]	296	203	41.0758	20.7676	-0.983956
ENSMUST00000023467	ENSMUST00000023467	MGI:1339984	Pak2	p21 protein (Cdc42/Rac)-activated kinase 2 [Source:MGI Symbol;Acc:MGI:1339984]	37	202	5.13448	20.6653	2.00892
ENSMUST00000100750	ENSMUST00000100750	MGI:99918	Mecp2	methyl CpG binding protein 2 [Source:MGI Symbol;Acc:MGI:99918]	62	202	8.60372	20.6653	1.26418
ENSMUST00000175460	ENSMUST00000175460	MGI:5452186	Gm22409	predicted gene, 22409 [Source:MGI Symbol;Acc:MGI:5452186]	99	202	13.7382	20.6653	0.589016
ENSMUST00000036288	ENSMUST00000036288	MGI:2448514	R3hdm1	R3H domain containing 1 [Source:MGI Symbol;Acc:MGI:2448514]	107	202	14.8484	20.6653	0.476906
ENSMUST00000022593	ENSMUST00000022593	MGI:2684060	Akap11	A kinase (PRKA) anchor protein 11 [Source:MGI Symbol;Acc:MGI:2684060]	107	202	14.8484	20.6653	0.476906
ENSMUST00000030613	ENSMUST00000030613	MGI:1858303	Srrm1	serine/arginine repetitive matrix 1 [Source:MGI Symbol;Acc:MGI:1858303]	156	202	21.6481	20.6653	-0.0670291
ENSMUST00000126125	ENSMUST00000126125	MGI:1922647	Arhgap24	Rho GTPase activating protein 24 [Source:MGI Symbol;Acc:MGI:1922647]	180	202	24.9785	20.6653	-0.27348
ENSMUST00000108582	ENSMUST00000108582	MGI:2385262	Suv420h2	suppressor of variegation 4-20 homolog 2 (Drosophila) [Source:MGI Symbol;Acc:MGI:2385262]	47	201	6.52218	20.563	1.65662
ENSMUST00000001326	ENSMUST00000001326	MGI:98372	Sp1	trans-acting transcription factor 1 [Source:MGI Symbol;Acc:MGI:98372]	77	201	10.6853	20.563	0.944427
ENSMUST00000025083	ENSMUST00000025083	MGI:1098268	Kif5b	kinesin family member 5B [Source:MGI Symbol;Acc:MGI:1098268]	79	201	10.9628	20.563	0.907433
ENSMUST00000114937	ENSMUST00000114937	MGI:2138893	Usp6nl	USP6 N-terminal like [Source:MGI Symbol;Acc:MGI:2138893]	99	201	13.7382	20.563	0.581857
ENSMUST00000102573	ENSMUST00000102573	MGI:1931835	Trim44	tripartite motif-containing 44 [Source:MGI Symbol;Acc:MGI:1931835]	120	201	16.6524	20.563	0.304323
ENSMUST00000132077	ENSMUST00000132077	MGI:2144114	Tug1	taurine upregulated gene 1 [Source:MGI Symbol;Acc:MGI:2144114]	126	201	17.485	20.563	0.233933
ENSMUST00000145390	ENSMUST00000145390	MGI:2141396	Styk1	serine/threonine/tyrosine kinase 1 [Source:MGI Symbol;Acc:MGI:2141396]	129	201	17.9013	20.563	0.199986
ENSMUST00000155890	ENSMUST00000155890	MGI:1923473	Agbl3	ATP/GTP binding protein-like 3 [Source:MGI Symbol;Acc:MGI:1923473]	135	201	18.7339	20.563	0.134398
ENSMUST00000082108	ENSMUST00000082108	MGI:108559	Macf1	microtubule-actin crosslinking factor 1 [Source:MGI Symbol;Acc:MGI:108559]	140	201	19.4278	20.563	0.0819303
ENSMUST00000004097	ENSMUST00000004097	MGI:88568	Cux1	cut-like homeobox 1 [Source:MGI Symbol;Acc:MGI:88568]	147	201	20.3991	20.563	0.011541
ENSMUST00000061753	ENSMUST00000061753	MGI:3584510	Wdfy4	WD repeat and FYVE domain containing 4 [Source:MGI Symbol;Acc:MGI:3584510]	151	201	20.9542	20.563	-0.0271914
ENSMUST00000134982	ENSMUST00000134982	MGI:3708667	Gm14296	predicted gene 14296 [Source:MGI Symbol;Acc:MGI:3708667]	152	201	21.093	20.563	-0.0367142
ENSMUST00000067567	ENSMUST00000067567	MGI:1347000	Lypla2	lysophospholipase 2 [Source:MGI Symbol;Acc:MGI:1347000]	62	200	8.60372	20.4607	1.24982
ENSMUST00000041643	ENSMUST00000041643	MGI:2443858	Pcif1	PDX1 C-terminal inhibiting factor 1 [Source:MGI Symbol;Acc:MGI:2443858]	81	200	11.2403	20.4607	0.864168
ENSMUST00000125531	ENSMUST00000125531	MGI:1926002	Csgalnact2	chondroitin sulfate N-acetylgalactosaminyltransferase 2 [Source:MGI Symbol;Acc:MGI:1926002]	89	200	12.3505	20.4607	0.728284
ENSMUST00000024816	ENSMUST00000024816	MGI:1921407	Ftsjd2	FtsJ methyltransferase domain containing 2 [Source:MGI Symbol;Acc:MGI:1921407]	95	200	13.1831	20.4607	0.634162
ENSMUST00000165733	ENSMUST00000165733	MGI:2386976	Abcc10	ATP-binding cassette, sub-family C (CFTR/MRP), member 10 [Source:MGI Symbol;Acc:MGI:2386976]	106	200	14.7096	20.4607	0.476097
ENSMUST00000152022	ENSMUST00000152022	MGI:1333849	Rasgrp2	RAS, guanyl releasing protein 2 [Source:MGI Symbol;Acc:MGI:1333849]	120	200	16.6524	20.4607	0.297127
ENSMUST00000181552	ENSMUST00000181552		AC119211.1		121	200	16.7911	20.4607	0.285155
ENSMUST00000129643	ENSMUST00000129643	MGI:3584518	A630010A05Rik	RIKEN cDNA A630010A05 gene [Source:MGI Symbol;Acc:MGI:3584518]	125	200	17.3462	20.4607	0.238234
ENSMUST00000159058	ENSMUST00000159058	MGI:2183747	Fgd4	FYVE, RhoGEF and PH domain containing 4 [Source:MGI Symbol;Acc:MGI:2183747]	218	200	30.2518	20.4607	-0.564167
ENSMUST00000042228	ENSMUST00000042228	MGI:96428	Ifi203	interferon activated gene 203 [Source:MGI Symbol;Acc:MGI:96428]	251	200	34.8312	20.4607	-0.767526
ENSMUST00000115924	ENSMUST00000115924		AC168977.1		334	200	46.3491	20.4607	-1.17969
ENSMUST00000179919	ENSMUST00000179919	MGI:2446220	Samd11	sterile alpha motif domain containing 11 [Source:MGI Symbol;Acc:MGI:2446220]	67	199	9.29757	20.3584	1.1307
ENSMUST00000034607	ENSMUST00000034607	MGI:2387591	Arcn1	archain 1 [Source:MGI Symbol;Acc:MGI:2387591]	72	199	9.99142	20.3584	1.02686
ENSMUST00000114459	ENSMUST00000114459	MGI:104819	Hnrnpa2b1	heterogeneous nuclear ribonucleoprotein A2/B1 [Source:MGI Symbol;Acc:MGI:104819]	98	199	13.5994	20.3584	0.582076
ENSMUST00000043896	ENSMUST00000043896	MGI:99948	Zfhx3	zinc finger homeobox 3 [Source:MGI Symbol;Acc:MGI:99948]	114	199	15.8197	20.3584	0.363896
ENSMUST00000034326	ENSMUST00000034326	MGI:2180801	Atp13a1	ATPase type 13A1 [Source:MGI Symbol;Acc:MGI:2180801]	134	199	18.5951	20.3584	0.130697
ENSMUST00000129244	ENSMUST00000129244	MGI:103254	Rpia	ribose 5-phosphate isomerase A [Source:MGI Symbol;Acc:MGI:103254]	143	199	19.8441	20.3584	0.0369149
ENSMUST00000146108	ENSMUST00000146108	MGI:1918604	Wdr31	WD repeat domain 31 [Source:MGI Symbol;Acc:MGI:1918604]	164	199	22.7582	20.3584	-0.160766
ENSMUST00000129547	ENSMUST00000129547	MGI:3651523	Skint8	selection and upkeep of intraepithelial T cells 8 [Source:MGI Symbol;Acc:MGI:3651523]	169	199	23.4521	20.3584	-0.204093
ENSMUST00000042078	ENSMUST00000042078	MGI:108359	Alx4	aristaless-like homeobox 4 [Source:MGI Symbol;Acc:MGI:108359]	262	199	36.3577	20.3584	-0.836637
ENSMUST00000029783	ENSMUST00000029783	MGI:1923992	Snx27	sorting nexin family member 27 [Source:MGI Symbol;Acc:MGI:1923992]	59	198	8.18741	20.2561	1.30688
ENSMUST00000012152	ENSMUST00000012152	MGI:892866	Dgcr2	DiGeorge syndrome critical region gene 2 [Source:MGI Symbol;Acc:MGI:892866]	73	198	10.1302	20.2561	0.999694
ENSMUST00000023048	ENSMUST00000023048	MGI:2146020	Smcr7l	Smith-Magenis syndrome chromosome region, candidate 7-like (human) [Source:MGI Symbol;Acc:MGI:2146020]	76	198	10.5465	20.2561	0.941591
ENSMUST00000025270	ENSMUST00000025270	MGI:1914128	Riok3	RIO kinase 3 [Source:MGI Symbol;Acc:MGI:1914128]	107	198	14.8484	20.2561	0.448051
ENSMUST00000050383	ENSMUST00000050383	MGI:3665412	Zfp646	zinc finger protein 646 [Source:MGI Symbol;Acc:MGI:3665412]	113	198	15.681	20.2561	0.369339
ENSMUST00000039303	ENSMUST00000039303	MGI:104963	Npy1r	neuropeptide Y receptor Y1 [Source:MGI Symbol;Acc:MGI:104963]	116	198	16.0973	20.2561	0.331537
ENSMUST00000059598	ENSMUST00000059598	MGI:3641792	Gm9776	predicted gene 9776 [Source:MGI Symbol;Acc:MGI:3641792]	119	198	16.5136	20.2561	0.2947
ENSMUST00000153951	ENSMUST00000153951	MGI:3649427	Gm12835	predicted gene 12835 [Source:MGI Symbol;Acc:MGI:3649427]	133	198	18.4564	20.2561	0.134236
ENSMUST00000096065	ENSMUST00000096065	MGI:3642260	Tigit	T cell immunoreceptor with Ig and ITIM domains [Source:MGI Symbol;Acc:MGI:3642260]	279	198	38.7168	20.2561	-0.934603
ENSMUST00000150161	ENSMUST00000150161	MGI:1339639	Ogt	O-linked N-acetylglucosamine (GlcNAc) transferase (UDP-N-acetylglucosamine:polypeptide-N-acetylglucosaminyl transferase) [Source:MGI Symbol;Acc:MGI:1339639]	58	197	8.04864	20.1538	1.32423
ENSMUST00000060061	ENSMUST00000060061	MGI:1916161	Pygo2	pygopus 2 [Source:MGI Symbol;Acc:MGI:1916161]	64	197	8.88126	20.1538	1.18221
ENSMUST00000060807	ENSMUST00000060807	MGI:2145900	Fam83h	family with sequence similarity 83, member H [Source:MGI Symbol;Acc:MGI:2145900]	70	197	9.71388	20.1538	1.05293
ENSMUST00000019615	ENSMUST00000019615	MGI:109531	Cdc37	cell division cycle 37 [Source:MGI Symbol;Acc:MGI:109531]	76	197	10.5465	20.1538	0.934286
ENSMUST00000070080	ENSMUST00000070080	MGI:1928380	B4galt6	UDP-Gal:betaGlcNAc beta 1,4-galactosyltransferase, polypeptide 6 [Source:MGI Symbol;Acc:MGI:1928380]	90	197	12.4893	20.1538	0.69036
ENSMUST00000099376	ENSMUST00000099376	MGI:107577	Wbp1l	WW domain binding protein 1 like [Source:MGI Symbol;Acc:MGI:107577]	108	197	14.9871	20.1538	0.427326
ENSMUST00000105778	ENSMUST00000105778	MGI:107628	Prdm2	PR domain containing 2, with ZNF domain [Source:MGI Symbol;Acc:MGI:107628]	112	197	15.5422	20.1538	0.374859
ENSMUST00000166839	ENSMUST00000166839	MGI:1926189	Emilin1	elastin microfibril interfacer 1 [Source:MGI Symbol;Acc:MGI:1926189]	114	197	15.8197	20.1538	0.349323
ENSMUST00000059045	ENSMUST00000059045	MGI:1923576	Exosc4	exosome component 4 [Source:MGI Symbol;Acc:MGI:1923576]	119	197	16.5136	20.1538	0.287396
ENSMUST00000091186	ENSMUST00000091186	MGI:2443752	Intu	inturned planar cell polarity effector homolog (Drosophila) [Source:MGI Symbol;Acc:MGI:2443752]	141	197	19.5665	20.1538	0.0426621
ENSMUST00000124524	ENSMUST00000124524	MGI:1915551	Cep57	centrosomal protein 57 [Source:MGI Symbol;Acc:MGI:1915551]	142	197	19.7053	20.1538	0.0324663
ENSMUST00000037764	ENSMUST00000037764	MGI:1344352	Dido1	death inducer-obliterator 1 [Source:MGI Symbol;Acc:MGI:1344352]	155	197	21.5093	20.1538	-0.093911
ENSMUST00000156330	ENSMUST00000156330	MGI:2678085	Sugp2	SURP and G patch domain containing 2 [Source:MGI Symbol;Acc:MGI:2678085]	81	196	11.2403	20.0515	0.835021
ENSMUST00000147643	ENSMUST00000147643	MGI:2136460	Echs1	enoyl Coenzyme A hydratase, short chain, 1, mitochondrial [Source:MGI Symbol;Acc:MGI:2136460]	88	196	12.2117	20.0515	0.71544
ENSMUST00000041055	ENSMUST00000041055	MGI:1923809	Atg2b	autophagy related 2B [Source:MGI Symbol;Acc:MGI:1923809]	95	196	13.1831	20.0515	0.605016
ENSMUST00000156007	ENSMUST00000156007	MGI:98085	Rpn2	ribophorin II [Source:MGI Symbol;Acc:MGI:98085]	96	196	13.3219	20.0515	0.589909
ENSMUST00000175275	ENSMUST00000175275	MGI:5452242	Gm22465	predicted gene, 22465 [Source:MGI Symbol;Acc:MGI:5452242]	127	196	17.6238	20.0515	0.186187
ENSMUST00000137320	ENSMUST00000137320	MGI:2441845	Snhg11	small nucleolar RNA host gene 11 [Source:MGI Symbol;Acc:MGI:2441845]	130	196	18.0401	20.0515	0.152504
ENSMUST00000155120	ENSMUST00000155120	MGI:1917700	Unc13d	unc-13 homolog D (C. elegans) [Source:MGI Symbol;Acc:MGI:1917700]	138	196	19.1502	20.0515	0.066347
ENSMUST00000073605	ENSMUST00000073605	MGI:95640	Gapdh	glyceraldehyde-3-phosphate dehydrogenase [Source:MGI Symbol;Acc:MGI:95640]	157	196	21.7868	20.0515	-0.119749
ENSMUST00000110336	ENSMUST00000110336	MGI:1918040	Ubr5	ubiquitin protein ligase E3 component n-recognin 5 [Source:MGI Symbol;Acc:MGI:1918040]	161	196	22.3419	20.0515	-0.156045
ENSMUST00000118266	ENSMUST00000118266	MGI:3705449	Gm14683	predicted gene 14683 [Source:MGI Symbol;Acc:MGI:3705449]	201	196	27.8927	20.0515	-0.47618
ENSMUST00000159855	ENSMUST00000159855	MGI:2179432	Mycbp2	MYC binding protein 2 [Source:MGI Symbol;Acc:MGI:2179432]	206	196	28.5866	20.0515	-0.511629
ENSMUST00000020081	ENSMUST00000020081	MGI:1289227	Zwint	ZW10 interactor [Source:MGI Symbol;Acc:MGI:1289227]	26	195	3.60801	19.9492	2.46705
ENSMUST00000030724	ENSMUST00000030724	MGI:2651874	Sesn2	sestrin 2 [Source:MGI Symbol;Acc:MGI:2651874]	47	195	6.52218	19.9492	1.6129
ENSMUST00000070786	ENSMUST00000070786	MGI:1914802	H2afy3	H2A histone family, member Y3 [Source:MGI Symbol;Acc:MGI:1914802]	54	195	7.49356	19.9492	1.4126
ENSMUST00000037383	ENSMUST00000037383	MGI:1916082	1110057K04Rik	RIKEN cDNA 1110057K04 gene [Source:MGI Symbol;Acc:MGI:1916082]	66	195	9.1588	19.9492	1.1231
ENSMUST00000035112	ENSMUST00000035112	MGI:97346	Nktr	natural killer tumor recognition sequence [Source:MGI Symbol;Acc:MGI:97346]	74	195	10.269	19.9492	0.958039
ENSMUST00000028280	ENSMUST00000028280	MGI:88457	Col5a1	collagen, type V, alpha 1 [Source:MGI Symbol;Acc:MGI:88457]	85	195	11.7954	19.9492	0.758101
ENSMUST00000103205	ENSMUST00000103205	MGI:108014	Polr1b	polymerase (RNA) I polypeptide B [Source:MGI Symbol;Acc:MGI:108014]	89	195	12.3505	19.9492	0.691758
ENSMUST00000140370	ENSMUST00000140370	MGI:1930751	Trpc4ap	transient receptor potential cation channel, subfamily C, member 4 associated protein [Source:MGI Symbol;Acc:MGI:1930751]	105	195	14.5708	19.9492	0.453246
ENSMUST00000059595	ENSMUST00000059595	MGI:97595	Prkca	protein kinase C, alpha [Source:MGI Symbol;Acc:MGI:97595]	107	195	14.8484	19.9492	0.426025
ENSMUST00000069456	ENSMUST00000069456	MGI:1349717	Ncor1	nuclear receptor co-repressor 1 [Source:MGI Symbol;Acc:MGI:1349717]	109	195	15.1259	19.9492	0.399308
ENSMUST00000025562	ENSMUST00000025562	MGI:1313288	Incenp	inner centromere protein [Source:MGI Symbol;Acc:MGI:1313288]	115	195	15.9585	19.9492	0.322002
ENSMUST00000152579	ENSMUST00000152579	MGI:102793	Fstl1	follistatin-like 1 [Source:MGI Symbol;Acc:MGI:102793]	166	195	23.0358	19.9492	-0.207548
ENSMUST00000095797	ENSMUST00000095797	MGI:109242	Spin1	spindlin 1 [Source:MGI Symbol;Acc:MGI:109242]	38	194	5.27325	19.8469	1.91215
ENSMUST00000048892	ENSMUST00000048892	MGI:1888594	Icmt	isoprenylcysteine carboxyl methyltransferase [Source:MGI Symbol;Acc:MGI:1888594]	48	194	6.66095	19.8469	1.57511
ENSMUST00000022623	ENSMUST00000022623	MGI:1914104	Trim35	tripartite motif-containing 35 [Source:MGI Symbol;Acc:MGI:1914104]	63	194	8.74249	19.8469	1.18279
ENSMUST00000019135	ENSMUST00000019135	MGI:2384159	Gga3	golgi associated, gamma adaptin ear containing, ARF binding protein 3 [Source:MGI Symbol;Acc:MGI:2384159]	79	194	10.9628	19.8469	0.856294
ENSMUST00000102484	ENSMUST00000102484	MGI:1917244	Ddi2	DNA-damage inducible protein 2 [Source:MGI Symbol;Acc:MGI:1917244]	82	194	11.3791	19.8469	0.802522
ENSMUST00000021116	ENSMUST00000021116	MGI:2442456	Unk	unkempt homolog (Drosophila) [Source:MGI Symbol;Acc:MGI:2442456]	91	194	12.628	19.8469	0.65228
ENSMUST00000099224	ENSMUST00000099224	MGI:88543	Csnk2a1	casein kinase 2, alpha 1 polypeptide [Source:MGI Symbol;Acc:MGI:88543]	94	194	13.0444	19.8469	0.605486
ENSMUST00000135469	ENSMUST00000135469	MGI:2443258	B230120H23Rik	RIKEN cDNA B230120H23 gene [Source:MGI Symbol;Acc:MGI:2443258]	97	194	13.4607	19.8469	0.560162
ENSMUST00000125706	ENSMUST00000125706	MGI:3584372	Fbxw20	F-box and WD-40 domain protein 20 [Source:MGI Symbol;Acc:MGI:3584372]	100	194	13.877	19.8469	0.516218
ENSMUST00000144404	ENSMUST00000144404	MGI:1913840	Farsa	phenylalanyl-tRNA synthetase, alpha subunit [Source:MGI Symbol;Acc:MGI:1913840]	114	194	15.8197	19.8469	0.327184
ENSMUST00000138456	ENSMUST00000138456	MGI:1915769	Eml1	echinoderm microtubule associated protein like 1 [Source:MGI Symbol;Acc:MGI:1915769]	139	194	19.289	19.8469	0.0411334
ENSMUST00000056946	ENSMUST00000056946	MGI:2429944	Neurl3	neuralized homolog 3 homolog (Drosophila) [Source:MGI Symbol;Acc:MGI:2429944]	151	194	20.9542	19.8469	-0.0783303
ENSMUST00000133715	ENSMUST00000133715	MGI:2144243	Clint1	clathrin interactor 1 [Source:MGI Symbol;Acc:MGI:2144243]	65	193	9.02003	19.7446	1.13025
ENSMUST00000032978	ENSMUST00000032978	MGI:1201407	Sh2b1	SH2B adaptor protein 1 [Source:MGI Symbol;Acc:MGI:1201407]	82	193	11.3791	19.7446	0.795067
ENSMUST00000142739	ENSMUST00000142739	MGI:1201387	Nlk	nemo like kinase [Source:MGI Symbol;Acc:MGI:1201387]	83	193	11.5179	19.7446	0.777579
ENSMUST00000148812	ENSMUST00000148812	MGI:1918779	Kazn	kazrin, periplakin interacting protein [Source:MGI Symbol;Acc:MGI:1918779]	91	193	12.628	19.7446	0.644824
ENSMUST00000035493	ENSMUST00000035493	MGI:2138741	Hnrnpf	heterogeneous nuclear ribonucleoprotein F [Source:MGI Symbol;Acc:MGI:2138741]	92	193	12.7668	19.7446	0.629057
ENSMUST00000133426	ENSMUST00000133426	MGI:105037	Ddx5	DEAD (Asp-Glu-Ala-Asp) box polypeptide 5 [Source:MGI Symbol;Acc:MGI:105037]	99	193	13.7382	19.7446	0.523262
ENSMUST00000035565	ENSMUST00000035565	MGI:97603	Pkd1	polycystic kidney disease 1 homolog [Source:MGI Symbol;Acc:MGI:97603]	101	193	14.0157	19.7446	0.494407
ENSMUST00000157037	ENSMUST00000157037	MGI:1890651	Brwd1	bromodomain and WD repeat domain containing 1 [Source:MGI Symbol;Acc:MGI:1890651]	107	193	14.8484	19.7446	0.411152
ENSMUST00000085809	ENSMUST00000085809	MGI:1921456	Sipa1l3	signal-induced proliferation-associated 1 like 3 [Source:MGI Symbol;Acc:MGI:1921456]	113	193	15.681	19.7446	0.33244
ENSMUST00000007803	ENSMUST00000007803	MGI:88139	Bcl2l1	BCL2-like 1 [Source:MGI Symbol;Acc:MGI:88139]	30	192	4.16309	19.6423	2.23823
ENSMUST00000021940	ENSMUST00000021940	MGI:1914140	Lman2	lectin, mannose-binding 2 [Source:MGI Symbol;Acc:MGI:1914140]	82	192	11.3791	19.6423	0.787572
ENSMUST00000094097	ENSMUST00000094097	MGI:1289225	Tmem41b	transmembrane protein 41B [Source:MGI Symbol;Acc:MGI:1289225]	83	192	11.5179	19.6423	0.770085
ENSMUST00000139014	ENSMUST00000139014	MGI:1924085	2900052L18Rik	RIKEN cDNA 2900052L18 gene [Source:MGI Symbol;Acc:MGI:1924085]	85	192	11.7954	19.6423	0.735733
ENSMUST00000072837	ENSMUST00000072837	MGI:1347488	Foxk1	forkhead box K1 [Source:MGI Symbol;Acc:MGI:1347488]	92	192	12.7668	19.6423	0.621562
ENSMUST00000114849	ENSMUST00000114849	MGI:3041238	Uhrf1bp1	UHRF1 (ICBP90) binding protein 1 [Source:MGI Symbol;Acc:MGI:3041238]	100	192	13.877	19.6423	0.501268
ENSMUST00000023361	ENSMUST00000023361	MGI:1920909	Pdxdc1	pyridoxal-dependent decarboxylase domain containing 1 [Source:MGI Symbol;Acc:MGI:1920909]	103	192	14.2933	19.6423	0.458624
ENSMUST00000128119	ENSMUST00000128119	MGI:2446294	Megf8	multiple EGF-like-domains 8 [Source:MGI Symbol;Acc:MGI:2446294]	103	192	14.2933	19.6423	0.458624
ENSMUST00000025965	ENSMUST00000025965	MGI:106209	Hells	helicase, lymphoid specific [Source:MGI Symbol;Acc:MGI:106209]	110	192	15.2647	19.6423	0.363764
ENSMUST00000029553	ENSMUST00000029553	MGI:1921633	Ubap2l	ubiquitin associated protein 2-like [Source:MGI Symbol;Acc:MGI:1921633]	110	192	15.2647	19.6423	0.363764
ENSMUST00000134436	ENSMUST00000134436	MGI:3651809	Gm11525	predicted gene 11525 [Source:MGI Symbol;Acc:MGI:3651809]	133	192	18.4564	19.6423	0.0898417
ENSMUST00000151980	ENSMUST00000151980	MGI:1925224	Rdh12	retinol dehydrogenase 12 [Source:MGI Symbol;Acc:MGI:1925224]	183	192	25.3949	19.6423	-0.370576
ENSMUST00000100167	ENSMUST00000100167	MGI:102676	Abcc1	ATP-binding cassette, sub-family C (CFTR/MRP), member 1 [Source:MGI Symbol;Acc:MGI:102676]	72	191	9.99142	19.54	0.967665
ENSMUST00000141390	ENSMUST00000141390	MGI:3782946	Gm15499	predicted gene 15499 [Source:MGI Symbol;Acc:MGI:3782946]	72	191	9.99142	19.54	0.967665
ENSMUST00000047815	ENSMUST00000047815	MGI:1924281	Slc9a8	solute carrier family 9 (sodium/hydrogen exchanger), member 8 [Source:MGI Symbol;Acc:MGI:1924281]	80	191	11.1016	19.54	0.815662
ENSMUST00000042012	ENSMUST00000042012	MGI:1289341	Sf3b3	splicing factor 3b, subunit 3 [Source:MGI Symbol;Acc:MGI:1289341]	92	191	12.7668	19.54	0.614028
ENSMUST00000133481	ENSMUST00000133481	MGI:1915384	Upf3b	UPF3 regulator of nonsense transcripts homolog B (yeast) [Source:MGI Symbol;Acc:MGI:1915384]	101	191	14.0157	19.54	0.479379
ENSMUST00000181621	ENSMUST00000181621		AL732311.1		104	191	14.4321	19.54	0.437151
ENSMUST00000004072	ENSMUST00000004072	MGI:1350927	Rpl8	ribosomal protein L8 [Source:MGI Symbol;Acc:MGI:1350927]	160	191	22.2032	19.54	-0.184338
ENSMUST00000160662	ENSMUST00000160662	MGI:3583944	Cdk15	cyclin-dependent kinase 15 [Source:MGI Symbol;Acc:MGI:3583944]	205	191	28.4478	19.54	-0.54189
ENSMUST00000095823	ENSMUST00000095823	MGI:1920917	2410004P03Rik	RIKEN cDNA 2410004P03 gene [Source:MGI Symbol;Acc:MGI:1920917]	306	191	42.4635	19.54	-1.1198
ENSMUST00000101030	ENSMUST00000101030	MGI:3645786	Gm7292	predicted gene 7292 [Source:MGI Symbol;Acc:MGI:3645786]	58	190	8.04864	19.4377	1.27204
ENSMUST00000179695	ENSMUST00000179695	MGI:2443934	Zfp799	zinc finger protein 799 [Source:MGI Symbol;Acc:MGI:2443934]	72	190	9.99142	19.4377	0.960092
ENSMUST00000018556	ENSMUST00000018556	MGI:1923969	Kansl1	KAT8 regulatory NSL complex subunit 1 [Source:MGI Symbol;Acc:MGI:1923969]	90	190	12.4893	19.4377	0.638164
ENSMUST00000100816	ENSMUST00000100816	MGI:2670178	Med13l	mediator complex subunit 13-like [Source:MGI Symbol;Acc:MGI:2670178]	96	190	13.3219	19.4377	0.545055
ENSMUST00000130969	ENSMUST00000130969	MGI:2444363	Strip2	striatin interacting protein 2 [Source:MGI Symbol;Acc:MGI:2444363]	98	190	13.5994	19.4377	0.515307
ENSMUST00000041095	ENSMUST00000041095	MGI:2668431	Aoc2	amine oxidase, copper containing 2 (retina-specific) [Source:MGI Symbol;Acc:MGI:2668431]	100	190	13.877	19.4377	0.486161
ENSMUST00000066582	ENSMUST00000066582	MGI:2444036	Srcap	Snf2-related CREBBP activator protein [Source:MGI Symbol;Acc:MGI:2444036]	101	190	14.0157	19.4377	0.471806
ENSMUST00000175578	ENSMUST00000175578	MGI:5455244	Gm25467	predicted gene, 25467 [Source:MGI Symbol;Acc:MGI:5455244]	112	190	15.5422	19.4377	0.322662
ENSMUST00000120643	ENSMUST00000120643	MGI:2446120	Ccdc114	coiled-coil domain containing 114 [Source:MGI Symbol;Acc:MGI:2446120]	119	190	16.5136	19.4377	0.235199
ENSMUST00000106704	ENSMUST00000106704	MGI:1338824	Rgs9	regulator of G-protein signaling 9 [Source:MGI Symbol;Acc:MGI:1338824]	128	190	17.7625	19.4377	0.130017
ENSMUST00000128758	ENSMUST00000128758	MGI:1343877	Rpl10a	ribosomal protein L10A [Source:MGI Symbol;Acc:MGI:1343877]	153	190	21.2318	19.4377	-0.127371
ENSMUST00000015791	ENSMUST00000015791	MGI:105382	Lama5	laminin, alpha 5 [Source:MGI Symbol;Acc:MGI:105382]	207	190	28.7253	19.4377	-0.56347
ENSMUST00000025236	ENSMUST00000025236	MGI:2156764	Stard4	StAR-related lipid transfer (START) domain containing 4 [Source:MGI Symbol;Acc:MGI:2156764]	57	189	7.90987	19.3353	1.28951
ENSMUST00000097588	ENSMUST00000097588	MGI:109605	Srgap2	SLIT-ROBO Rho GTPase activating protein 2 [Source:MGI Symbol;Acc:MGI:109605]	82	189	11.3791	19.3353	0.764852
ENSMUST00000109605	ENSMUST00000109605	MGI:88096	Atf4	activating transcription factor 4 [Source:MGI Symbol;Acc:MGI:88096]	97	189	13.4607	19.3353	0.522491
ENSMUST00000094821	ENSMUST00000094821	MGI:2154263	Gltscr1	glioma tumor suppressor candidate region gene 1 [Source:MGI Symbol;Acc:MGI:2154263]	97	189	13.4607	19.3353	0.522491
ENSMUST00000026470	ENSMUST00000026470	MGI:1277989	Shmt2	serine hydroxymethyltransferase 2 (mitochondrial) [Source:MGI Symbol;Acc:MGI:1277989]	97	189	13.4607	19.3353	0.522491
ENSMUST00000042766	ENSMUST00000042766	MGI:2442111	Ppm1k	protein phosphatase 1K (PP2C domain containing) [Source:MGI Symbol;Acc:MGI:2442111]	104	189	14.4321	19.3353	0.421964
ENSMUST00000145608	ENSMUST00000145608	MGI:2141658	Vopp1	vesicular, overexpressed in cancer, prosurvival protein 1 [Source:MGI Symbol;Acc:MGI:2141658]	113	189	15.681	19.3353	0.302225
ENSMUST00000100329	ENSMUST00000100329	MGI:1926047	Ndor1	NADPH dependent diflavin oxidoreductase 1 [Source:MGI Symbol;Acc:MGI:1926047]	114	189	15.8197	19.3353	0.289514
ENSMUST00000048371	ENSMUST00000048371	MGI:109127	Tsc22d1	TSC22 domain family, member 1 [Source:MGI Symbol;Acc:MGI:109127]	125	189	17.3462	19.3353	0.15662
ENSMUST00000160698	ENSMUST00000160698	MGI:3780415	Gm2245	predicted gene 2245 [Source:MGI Symbol;Acc:MGI:3780415]	176	189	24.4235	19.3353	-0.337028
ENSMUST00000064846	ENSMUST00000064846	MGI:5435040	Gm21685	predicted gene, 21685 [Source:MGI Symbol;Acc:MGI:5435040]	193	189	26.7826	19.3353	-0.470053
ENSMUST00000032094	ENSMUST00000032094	MGI:2141676	Fbxl14	F-box and leucine-rich repeat protein 14 [Source:MGI Symbol;Acc:MGI:2141676]	65	188	9.02003	19.233	1.09238
ENSMUST00000034846	ENSMUST00000034846	MGI:1921461	1700017B05Rik	RIKEN cDNA 1700017B05 gene [Source:MGI Symbol;Acc:MGI:1921461]	70	188	9.71388	19.233	0.985467
ENSMUST00000093389	ENSMUST00000093389	MGI:1921772	Morc2a	microrchidia 2A [Source:MGI Symbol;Acc:MGI:1921772]	76	188	10.5465	19.233	0.866823
ENSMUST00000181113	ENSMUST00000181113		AC163355.1		77	188	10.6853	19.233	0.847964
ENSMUST00000037915	ENSMUST00000037915	MGI:1921276	Msl1	male-specific lethal 1 homolog (Drosophila) [Source:MGI Symbol;Acc:MGI:1921276]	86	188	11.9342	19.233	0.688486
ENSMUST00000180897	ENSMUST00000180897	MGI:95640	Gapdh	glyceraldehyde-3-phosphate dehydrogenase [Source:MGI Symbol;Acc:MGI:95640]	89	188	12.3505	19.233	0.639017
ENSMUST00000015003	ENSMUST00000015003	MGI:103012	E2f4	E2F transcription factor 4 [Source:MGI Symbol;Acc:MGI:103012]	91	188	12.628	19.233	0.606956
ENSMUST00000091299	ENSMUST00000091299	MGI:102956	Cdk7	cyclin-dependent kinase 7 [Source:MGI Symbol;Acc:MGI:102956]	94	188	13.0444	19.233	0.560162
ENSMUST00000045277	ENSMUST00000045277	MGI:1333763	Epn1	epsin 1 [Source:MGI Symbol;Acc:MGI:1333763]	94	188	13.0444	19.233	0.560162
ENSMUST00000018651	ENSMUST00000018651	MGI:1341836	Trpv2	transient receptor potential cation channel, subfamily V, member 2 [Source:MGI Symbol;Acc:MGI:1341836]	98	188	13.5994	19.233	0.500041
ENSMUST00000179395	ENSMUST00000179395	MGI:1928469	Trip4	thyroid hormone receptor interactor 4 [Source:MGI Symbol;Acc:MGI:1928469]	134	188	18.5951	19.233	0.0486613
ENSMUST00000155368	ENSMUST00000155368	MGI:2446110	Hace1	HECT domain and ankyrin repeat containing, E3 ubiquitin protein ligase 1 [Source:MGI Symbol;Acc:MGI:2446110]	135	188	18.7339	19.233	0.0379349
ENSMUST00000057892	ENSMUST00000057892	MGI:2444008	Bptf	bromodomain PHD finger transcription factor [Source:MGI Symbol;Acc:MGI:2444008]	138	188	19.1502	19.233	0.00622601
ENSMUST00000181816	ENSMUST00000181816		AC117792.1		191	188	26.505	19.233	-0.462678
ENSMUST00000151894	ENSMUST00000151894	MGI:1891833	Pfkp	phosphofructokinase, platelet [Source:MGI Symbol;Acc:MGI:1891833]	38	187	5.27325	19.1307	1.85913
ENSMUST00000067386	ENSMUST00000067386	MGI:1913617	2310022A10Rik	RIKEN cDNA 2310022A10 gene [Source:MGI Symbol;Acc:MGI:1913617]	49	187	6.79972	19.1307	1.49235
ENSMUST00000004646	ENSMUST00000004646	MGI:1345964	Coro1c	coronin, actin binding protein 1C [Source:MGI Symbol;Acc:MGI:1345964]	67	187	9.29757	19.1307	1.04097
ENSMUST00000143873	ENSMUST00000143873	MGI:1916255	Ubald1	UBA-like domain containing 1 [Source:MGI Symbol;Acc:MGI:1916255]	72	187	9.99142	19.1307	0.937131
ENSMUST00000035086	ENSMUST00000035086	MGI:1333753	Pdcd6ip	programmed cell death 6 interacting protein [Source:MGI Symbol;Acc:MGI:1333753]	74	187	10.269	19.1307	0.897603
ENSMUST00000042096	ENSMUST00000042096	MGI:2443696	Emc1	ER membrane protein complex subunit 1 [Source:MGI Symbol;Acc:MGI:2443696]	77	187	10.6853	19.1307	0.84027
ENSMUST00000035010	ENSMUST00000035010	MGI:1915542	Stt3b	STT3, subunit of the oligosaccharyltransferase complex, homolog B (S. cerevisiae) [Source:MGI Symbol;Acc:MGI:1915542]	85	187	11.7954	19.1307	0.697665
ENSMUST00000179343	ENSMUST00000179343	MGI:1338779	Purb	purine rich element binding protein B [Source:MGI Symbol;Acc:MGI:1338779]	99	187	13.7382	19.1307	0.477699
ENSMUST00000000896	ENSMUST00000000896	MGI:1891701	Pxmp4	peroxisomal membrane protein 4 [Source:MGI Symbol;Acc:MGI:1891701]	99	187	13.7382	19.1307	0.477699
ENSMUST00000092996	ENSMUST00000092996	MGI:106362	Sco1	SCO cytochrome oxidase deficient homolog 1 (yeast) [Source:MGI Symbol;Acc:MGI:106362]	100	187	13.877	19.1307	0.4632
ENSMUST00000091291	ENSMUST00000091291	MGI:96575	Insr	insulin receptor [Source:MGI Symbol;Acc:MGI:96575]	113	187	15.681	19.1307	0.286877
ENSMUST00000181939	ENSMUST00000181939		AC170188.1		122	187	16.9299	19.1307	0.176319
ENSMUST00000038141	ENSMUST00000038141	MGI:2672859	Slfn8	schlafen 8 [Source:MGI Symbol;Acc:MGI:2672859]	132	187	18.3176	19.1307	0.062662
ENSMUST00000106027	ENSMUST00000106027	MGI:2141847	Phrf1	PHD and ring finger domains 1 [Source:MGI Symbol;Acc:MGI:2141847]	148	187	20.5379	19.1307	-0.102397
ENSMUST00000034602	ENSMUST00000034602	MGI:88331	Cd3d	CD3 antigen, delta polypeptide [Source:MGI Symbol;Acc:MGI:88331]	178	187	24.701	19.1307	-0.368677
ENSMUST00000079389	ENSMUST00000079389	MGI:1923033	4930431F12Rik	RIKEN cDNA 4930431F12 gene [Source:MGI Symbol;Acc:MGI:1923033]	391	187	54.259	19.1307	-1.50397
ENSMUST00000031530	ENSMUST00000031530	MGI:1891433	Sppl3	signal peptide peptidase 3 [Source:MGI Symbol;Acc:MGI:1891433]	27	186	3.74678	19.0284	2.34443
ENSMUST00000084026	ENSMUST00000084026	MGI:2142581	Whsc1l1	Wolf-Hirschhorn syndrome candidate 1-like 1 (human) [Source:MGI Symbol;Acc:MGI:2142581]	58	186	8.04864	19.0284	1.24134
ENSMUST00000093833	ENSMUST00000093833	MGI:1925573	Fam219b	family with sequence similarity 219, member B [Source:MGI Symbol;Acc:MGI:1925573]	68	186	9.43634	19.0284	1.01186
ENSMUST00000028426	ENSMUST00000028426	MGI:2442564	Cers6	ceramide synthase 6 [Source:MGI Symbol;Acc:MGI:2442564]	88	186	12.2117	19.0284	0.639889
ENSMUST00000020608	ENSMUST00000020608	MGI:1321159	Ppp2ca	protein phosphatase 2 (formerly 2A), catalytic subunit, alpha isoform [Source:MGI Symbol;Acc:MGI:1321159]	90	186	12.4893	19.0284	0.607467
ENSMUST00000179857	ENSMUST00000179857	MGI:1915202	Tomm20	translocase of outer mitochondrial membrane 20 homolog (yeast) [Source:MGI Symbol;Acc:MGI:1915202]	97	186	13.4607	19.0284	0.499408
ENSMUST00000171700	ENSMUST00000171700	MGI:1916188	Aspscr1	alveolar soft part sarcoma chromosome region, candidate 1 (human) [Source:MGI Symbol;Acc:MGI:1916188]	101	186	14.0157	19.0284	0.441109
ENSMUST00000101626	ENSMUST00000101626	MGI:3041210	Ccdc157	coiled-coil domain containing 157 [Source:MGI Symbol;Acc:MGI:3041210]	104	186	14.4321	19.0284	0.398881
ENSMUST00000147006	ENSMUST00000147006	MGI:3651846	Gm11683	predicted gene 11683 [Source:MGI Symbol;Acc:MGI:3651846]	104	186	14.4321	19.0284	0.398881
ENSMUST00000096250	ENSMUST00000096250	MGI:1924294	Arid2	AT rich interactive domain 2 (ARID, RFX-like) [Source:MGI Symbol;Acc:MGI:1924294]	114	186	15.8197	19.0284	0.26643
ENSMUST00000181260	ENSMUST00000181260		AC109197.1		114	186	15.8197	19.0284	0.26643
ENSMUST00000111962	ENSMUST00000111962	MGI:1917171	Hnrnpa3	heterogeneous nuclear ribonucleoprotein A3 [Source:MGI Symbol;Acc:MGI:1917171]	115	186	15.9585	19.0284	0.25383
ENSMUST00000162364	ENSMUST00000162364	MGI:104899	Mob4	MOB family member 4, phocein [Source:MGI Symbol;Acc:MGI:104899]	125	186	17.3462	19.0284	0.133536
ENSMUST00000090052	ENSMUST00000090052	MGI:2447762	Yeats2	YEATS domain containing 2 [Source:MGI Symbol;Acc:MGI:2447762]	132	186	18.3176	19.0284	0.0549263
ENSMUST00000102927	ENSMUST00000102927	MGI:1338068	Pdpk1	3-phosphoinositide dependent protein kinase 1 [Source:MGI Symbol;Acc:MGI:1338068]	61	185	8.46495	18.9261	1.16081
ENSMUST00000067664	ENSMUST00000067664	MGI:894689	Ywhae	tyrosine 3-monooxygenase/tryptophan 5-monooxygenase activation protein, epsilon polypeptide [Source:MGI Symbol;Acc:MGI:894689]	65	185	9.02003	18.9261	1.06918
ENSMUST00000175441	ENSMUST00000175441	MGI:5455465	Gm25688	predicted gene, 25688 [Source:MGI Symbol;Acc:MGI:5455465]	79	185	10.9628	18.9261	0.787762
ENSMUST00000142269	ENSMUST00000142269	MGI:101849	Gnb2l1	guanine nucleotide binding protein (G protein), beta polypeptide 2 like 1 [Source:MGI Symbol;Acc:MGI:101849]	81	185	11.2403	18.9261	0.751693
ENSMUST00000140523	ENSMUST00000140523	MGI:3648156	Slc38a6	solute carrier family 38, member 6 [Source:MGI Symbol;Acc:MGI:3648156]	85	185	11.7954	18.9261	0.682152
ENSMUST00000061767	ENSMUST00000061767	MGI:2675296	Crebzf	CREB/ATF bZIP transcription factor [Source:MGI Symbol;Acc:MGI:2675296]	86	185	11.9342	18.9261	0.665278
ENSMUST00000129289	ENSMUST00000129289	MGI:98788	Top1	topoisomerase (DNA) I [Source:MGI Symbol;Acc:MGI:98788]	92	185	12.7668	18.9261	0.567981
ENSMUST00000097619	ENSMUST00000097619	MGI:2686460	Prob1	proline rich basic protein 1 [Source:MGI Symbol;Acc:MGI:2686460]	100	185	13.877	18.9261	0.447687
ENSMUST00000030739	ENSMUST00000030739	MGI:95401	Epb4.1	erythrocyte protein band 4.1 [Source:MGI Symbol;Acc:MGI:95401]	101	185	14.0157	18.9261	0.433332
ENSMUST00000064701	ENSMUST00000064701	MGI:2384987	B4galt7	xylosylprotein beta1,4-galactosyltransferase, polypeptide 7 (galactosyltransferase I) [Source:MGI Symbol;Acc:MGI:2384987]	110	185	15.2647	18.9261	0.310183
ENSMUST00000108741	ENSMUST00000108741	MGI:4937016	Gm17382	predicted gene, 17382 [Source:MGI Symbol;Acc:MGI:4937016]	186	185	25.8112	18.9261	-0.447616
ENSMUST00000127328	ENSMUST00000127328	MGI:3801761	Gm16070	predicted gene 16070 [Source:MGI Symbol;Acc:MGI:3801761]	261	185	36.2189	18.9261	-0.936363
ENSMUST00000100162	ENSMUST00000100162	MGI:1929063	Copz1	coatomer protein complex, subunit zeta 1 [Source:MGI Symbol;Acc:MGI:1929063]	39	184	5.41202	18.8238	1.79832
ENSMUST00000093162	ENSMUST00000093162	MGI:3694797	Atxn1l	ataxin 1-like [Source:MGI Symbol;Acc:MGI:3694797]	56	184	7.7711	18.8238	1.27637
ENSMUST00000025050	ENSMUST00000025050	MGI:1928484	Nudt3	nudix (nucleotide diphosphate linked moiety X)-type motif 3 [Source:MGI Symbol;Acc:MGI:1928484]	56	184	7.7711	18.8238	1.27637
ENSMUST00000070923	ENSMUST00000070923	MGI:1925301	Them6	thioesterase superfamily member 6 [Source:MGI Symbol;Acc:MGI:1925301]	77	184	10.6853	18.8238	0.816937
ENSMUST00000033905	ENSMUST00000033905	MGI:1921840	Ankrd10	ankyrin repeat domain 10 [Source:MGI Symbol;Acc:MGI:1921840]	81	184	11.2403	18.8238	0.743874
ENSMUST00000059286	ENSMUST00000059286	MGI:2429603	Irak2	interleukin-1 receptor-associated kinase 2 [Source:MGI Symbol;Acc:MGI:2429603]	100	184	13.877	18.8238	0.439867
ENSMUST00000091146	ENSMUST00000091146	MGI:104580	Rapgef1	Rap guanine nucleotide exchange factor (GEF) 1 [Source:MGI Symbol;Acc:MGI:104580]	101	184	14.0157	18.8238	0.425512
ENSMUST00000175008	ENSMUST00000175008	MGI:5451953	Gm22176	predicted gene, 22176 [Source:MGI Symbol;Acc:MGI:5451953]	105	184	14.5708	18.8238	0.369478
ENSMUST00000115859	ENSMUST00000115859	MGI:1920511	1700037C18Rik	RIKEN cDNA 1700037C18 gene [Source:MGI Symbol;Acc:MGI:1920511]	106	184	14.7096	18.8238	0.355803
ENSMUST00000055506	ENSMUST00000055506	MGI:107887	Gtf3c1	general transcription factor III C 1 [Source:MGI Symbol;Acc:MGI:107887]	118	184	16.3748	18.8238	0.201081
ENSMUST00000141755	ENSMUST00000141755	MGI:1914743	Mettl16	methyltransferase like 16 [Source:MGI Symbol;Acc:MGI:1914743]	120	184	16.6524	18.8238	0.176833
ENSMUST00000083715	ENSMUST00000083715	MGI:3646921	Snora74a	small nucleolar RNA, H/ACA box 74A [Source:MGI Symbol;Acc:MGI:3646921]	60	183	8.32618	18.7215	1.16897
ENSMUST00000102948	ENSMUST00000102948	MGI:1096340	E2f3	E2F transcription factor 3 [Source:MGI Symbol;Acc:MGI:1096340]	61	183	8.46495	18.7215	1.14512
ENSMUST00000034392	ENSMUST00000034392	MGI:1913414	Nip7	nuclear import 7 homolog (S. cerevisiae) [Source:MGI Symbol;Acc:MGI:1913414]	80	183	11.1016	18.7215	0.753933
ENSMUST00000141152	ENSMUST00000141152	MGI:2388633	Cltc	clathrin, heavy polypeptide (Hc) [Source:MGI Symbol;Acc:MGI:2388633]	92	183	12.7668	18.7215	0.552299
ENSMUST00000016897	ENSMUST00000016897	MGI:2443047	Ttll1	tubulin tyrosine ligase-like 1 [Source:MGI Symbol;Acc:MGI:2443047]	95	183	13.1831	18.7215	0.506006
ENSMUST00000146663	ENSMUST00000146663	MGI:4937860	Gm17033	predicted gene 17033 [Source:MGI Symbol;Acc:MGI:4937860]	99	183	13.7382	18.7215	0.446505
ENSMUST00000042662	ENSMUST00000042662	MGI:1924039	Mzt1	mitotic spindle organizing protein 1 [Source:MGI Symbol;Acc:MGI:1924039]	107	183	14.8484	18.7215	0.334394
ENSMUST00000006854	ENSMUST00000006854	MGI:1918722	Usp19	ubiquitin specific peptidase 19 [Source:MGI Symbol;Acc:MGI:1918722]	109	183	15.1259	18.7215	0.307677
ENSMUST00000013294	ENSMUST00000013294	MGI:1917825	Gfod2	glucose-fructose oxidoreductase domain containing 2 [Source:MGI Symbol;Acc:MGI:1917825]	113	183	15.681	18.7215	0.255682
ENSMUST00000154971	ENSMUST00000154971	MGI:2448541	Caprin2	caprin family member 2 [Source:MGI Symbol;Acc:MGI:2448541]	114	183	15.8197	18.7215	0.242971
ENSMUST00000143640	ENSMUST00000143640	MGI:1914819	Mgat4c	mannosyl (alpha-1,3-)-glycoprotein beta-1,4-N-acetylglucosaminyltransferase, isozyme C (putative) [Source:MGI Symbol;Acc:MGI:1914819]	193	183	26.7826	18.7215	-0.516596
ENSMUST00000020930	ENSMUST00000020930	MGI:95768	Gna13	guanine nucleotide binding protein, alpha 13 [Source:MGI Symbol;Acc:MGI:95768]	48	182	6.66095	18.6192	1.48299
ENSMUST00000042057	ENSMUST00000042057	MGI:1890222	Midn	midnolin [Source:MGI Symbol;Acc:MGI:1890222]	54	182	7.49356	18.6192	1.31307
ENSMUST00000138662	ENSMUST00000138662	MGI:1333780	Rps19	ribosomal protein S19 [Source:MGI Symbol;Acc:MGI:1333780]	59	182	8.18741	18.6192	1.18531
ENSMUST00000175849	ENSMUST00000175849	MGI:1933111	Apobec3	apolipoprotein B mRNA editing enzyme, catalytic polypeptide 3 [Source:MGI Symbol;Acc:MGI:1933111]	81	182	11.2403	18.6192	0.728106
ENSMUST00000002925	ENSMUST00000002925	MGI:1922139	Timmdc1	translocase of inner mitochondrial membrane domain containing 1 [Source:MGI Symbol;Acc:MGI:1922139]	83	182	11.5179	18.6192	0.692917
ENSMUST00000077946	ENSMUST00000077946	MGI:2146320	Dock10	dedicator of cytokinesis 10 [Source:MGI Symbol;Acc:MGI:2146320]	104	182	14.4321	18.6192	0.367517
ENSMUST00000181643	ENSMUST00000181643		RP24		111	182	15.4034	18.6192	0.27354
ENSMUST00000133112	ENSMUST00000133112	MGI:1097712	Npc1	Niemann Pick type C1 [Source:MGI Symbol;Acc:MGI:1097712]	114	182	15.8197	18.6192	0.235066
ENSMUST00000117237	ENSMUST00000117237	MGI:2138986	Qser1	glutamine and serine rich 1 [Source:MGI Symbol;Acc:MGI:2138986]	116	182	16.0973	18.6192	0.209975
ENSMUST00000043775	ENSMUST00000043775	MGI:1923356	Kdm3b	KDM3B lysine (K)-specific demethylase 3B [Source:MGI Symbol;Acc:MGI:1923356]	116	182	16.0973	18.6192	0.209975
ENSMUST00000113573	ENSMUST00000113573	MGI:103067	Atrx	alpha thalassemia/mental retardation syndrome X-linked homolog (human) [Source:MGI Symbol;Acc:MGI:103067]	120	182	16.6524	18.6192	0.161066
ENSMUST00000043866	ENSMUST00000043866	MGI:1351646	Abca7	ATP-binding cassette, sub-family A (ABC1), member 7 [Source:MGI Symbol;Acc:MGI:1351646]	133	182	18.4564	18.6192	0.0126738
ENSMUST00000162342	ENSMUST00000162342	MGI:1891304	Ap1s3	adaptor-related protein complex AP-1, sigma 3 [Source:MGI Symbol;Acc:MGI:1891304]	183	182	25.3949	18.6192	-0.447744
ENSMUST00000019248	ENSMUST00000019248	MGI:88322	Cd22	CD22 antigen [Source:MGI Symbol;Acc:MGI:88322]	211	182	29.2804	18.6192	-0.653143
ENSMUST00000093527	ENSMUST00000093527	MGI:3642009	Gm10608	predicted gene 10608 [Source:MGI Symbol;Acc:MGI:3642009]	252	182	34.97	18.6192	-0.909324
ENSMUST00000025490	ENSMUST00000025490	MGI:1916106	Prrc1	proline-rich coiled-coil 1 [Source:MGI Symbol;Acc:MGI:1916106]	76	181	10.5465	18.5169	0.81208
ENSMUST00000044766	ENSMUST00000044766	MGI:1923029	4930402H24Rik	RIKEN cDNA 4930402H24 gene [Source:MGI Symbol;Acc:MGI:1923029]	100	181	13.877	18.5169	0.416151
ENSMUST00000170909	ENSMUST00000170909	MGI:101934	Tfdp1	transcription factor Dp 1 [Source:MGI Symbol;Acc:MGI:101934]	100	181	13.877	18.5169	0.416151
ENSMUST00000135208	ENSMUST00000135208	MGI:1098815	Cdc23	CDC23 cell division cycle 23 [Source:MGI Symbol;Acc:MGI:1098815]	103	181	14.2933	18.5169	0.373507
ENSMUST00000084214	ENSMUST00000084214	MGI:1923935	Eif4g3	eukaryotic translation initiation factor 4 gamma, 3 [Source:MGI Symbol;Acc:MGI:1923935]	110	181	15.2647	18.5169	0.278648
ENSMUST00000136441	ENSMUST00000136441	MGI:99437	Arl4a	ADP-ribosylation factor-like 4A [Source:MGI Symbol;Acc:MGI:99437]	118	181	16.3748	18.5169	0.177364
ENSMUST00000154870	ENSMUST00000154870	MGI:103021	Recql	RecQ protein-like [Source:MGI Symbol;Acc:MGI:103021]	142	181	19.7053	18.5169	-0.0897396
ENSMUST00000144714	ENSMUST00000144714	MGI:1353510	Arhgef1	Rho guanine nucleotide exchange factor (GEF) 1 [Source:MGI Symbol;Acc:MGI:1353510]	26	180	3.60801	18.4146	2.35157
ENSMUST00000047652	ENSMUST00000047652	MGI:1196325	Tspan14	tetraspanin 14 [Source:MGI Symbol;Acc:MGI:1196325]	32	180	4.44063	18.4146	2.05201
ENSMUST00000037596	ENSMUST00000037596	MGI:2443910	Bcorl1	BCL6 co-repressor-like 1 [Source:MGI Symbol;Acc:MGI:2443910]	46	180	6.38341	18.4146	1.52845
ENSMUST00000038128	ENSMUST00000038128	MGI:1915789	Tmem109	transmembrane protein 109 [Source:MGI Symbol;Acc:MGI:1915789]	57	180	7.90987	18.4146	1.21912
ENSMUST00000017435	ENSMUST00000017435	MGI:1914490	Taok1	TAO kinase 1 [Source:MGI Symbol;Acc:MGI:1914490]	78	180	10.824	18.4146	0.766612
ENSMUST00000133693	ENSMUST00000133693	MGI:1917070	1810059H22Rik	RIKEN cDNA 1810059H22 gene [Source:MGI Symbol;Acc:MGI:1917070]	78	180	10.824	18.4146	0.766612
ENSMUST00000026433	ENSMUST00000026433	MGI:1915344	Smarcc2	SWI/SNF related, matrix associated, actin dependent regulator of chromatin, subfamily c, member 2 [Source:MGI Symbol;Acc:MGI:1915344]	86	180	11.9342	18.4146	0.62575
ENSMUST00000168646	ENSMUST00000168646	MGI:2441921	C730034F03Rik	RIKEN cDNA C730034F03 gene [Source:MGI Symbol;Acc:MGI:2441921]	86	180	11.9342	18.4146	0.62575
ENSMUST00000169266	ENSMUST00000169266	MGI:1918972	Cic	capicua homolog (Drosophila) [Source:MGI Symbol;Acc:MGI:1918972]	100	180	13.877	18.4146	0.408159
ENSMUST00000060077	ENSMUST00000060077	MGI:104841	Cpox	coproporphyrinogen oxidase [Source:MGI Symbol;Acc:MGI:104841]	103	180	14.2933	18.4146	0.365514
ENSMUST00000025243	ENSMUST00000025243	MGI:1920723	Iws1	IWS1 homolog (S. cerevisiae) [Source:MGI Symbol;Acc:MGI:1920723]	113	180	15.681	18.4146	0.231836
ENSMUST00000107362	ENSMUST00000107362	MGI:97513	Furin	furin (paired basic amino acid cleaving enzyme) [Source:MGI Symbol;Acc:MGI:97513]	120	180	16.6524	18.4146	0.145124
ENSMUST00000027421	ENSMUST00000027421	MGI:1309481	Trip12	thyroid hormone receptor interactor 12 [Source:MGI Symbol;Acc:MGI:1309481]	122	180	16.9299	18.4146	0.121277
ENSMUST00000064821	ENSMUST00000064821	MGI:96607	Itgam	integrin alpha M [Source:MGI Symbol;Acc:MGI:96607]	148	180	20.5379	18.4146	-0.157439
ENSMUST00000007296	ENSMUST00000007296	MGI:1196391	Pole	polymerase (DNA directed), epsilon [Source:MGI Symbol;Acc:MGI:1196391]	152	180	21.093	18.4146	-0.195913
ENSMUST00000066148	ENSMUST00000066148	MGI:1925543	Tbcel	tubulin folding cofactor E-like [Source:MGI Symbol;Acc:MGI:1925543]	52	179	7.21603	18.3123	1.34354
ENSMUST00000030840	ENSMUST00000030840	MGI:3605801	Angptl7	angiopoietin-like 7 [Source:MGI Symbol;Acc:MGI:3605801]	73	179	10.1302	18.3123	0.854153
ENSMUST00000037422	ENSMUST00000037422	MGI:2145310	Rnf44	ring finger protein 44 [Source:MGI Symbol;Acc:MGI:2145310]	79	179	10.9628	18.3123	0.740197
ENSMUST00000044331	ENSMUST00000044331	MGI:2442415	Kat6a	K(lysine) acetyltransferase 6A [Source:MGI Symbol;Acc:MGI:2442415]	85	179	11.7954	18.3123	0.634586
ENSMUST00000014389	ENSMUST00000014389	MGI:2681271	Pigl	phosphatidylinositol glycan anchor biosynthesis, class L [Source:MGI Symbol;Acc:MGI:2681271]	87	179	12.073	18.3123	0.601034
ENSMUST00000025642	ENSMUST00000025642	MGI:106247	Prpf19	PRP19/PSO4 pre-mRNA processing factor 19 homolog (S. cerevisiae) [Source:MGI Symbol;Acc:MGI:106247]	99	179	13.7382	18.3123	0.414621
ENSMUST00000132735	ENSMUST00000132735	MGI:2143698	Vezt	vezatin, adherens junctions transmembrane protein [Source:MGI Symbol;Acc:MGI:2143698]	103	179	14.2933	18.3123	0.357477
ENSMUST00000040914	ENSMUST00000040914	MGI:1931526	Hist1h1c	histone cluster 1, H1c [Source:MGI Symbol;Acc:MGI:1931526]	108	179	14.9871	18.3123	0.28909
ENSMUST00000151364	ENSMUST00000151364	MGI:1341628	Atrn	attractin [Source:MGI Symbol;Acc:MGI:1341628]	110	179	15.2647	18.3123	0.262618
ENSMUST00000123203	ENSMUST00000123203	MGI:2443446	Scfd2	Sec1 family domain containing 2 [Source:MGI Symbol;Acc:MGI:2443446]	113	179	15.681	18.3123	0.223798
ENSMUST00000075491	ENSMUST00000075491	MGI:1341070	Fkbp8	FK506 binding protein 8 [Source:MGI Symbol;Acc:MGI:1341070]	116	179	16.0973	18.3123	0.185996
ENSMUST00000048646	ENSMUST00000048646	MGI:1916380	Vps13b	vacuolar protein sorting 13B (yeast) [Source:MGI Symbol;Acc:MGI:1916380]	152	179	21.093	18.3123	-0.20395
ENSMUST00000015712	ENSMUST00000015712	MGI:96820	Lpl	lipoprotein lipase [Source:MGI Symbol;Acc:MGI:96820]	208	179	28.8641	18.3123	-0.656462
ENSMUST00000080537	ENSMUST00000080537	MGI:97845	Rac1	RAS-related C3 botulinum substrate 1 [Source:MGI Symbol;Acc:MGI:97845]	54	178	7.49356	18.21	1.28101
ENSMUST00000109627	ENSMUST00000109627	MGI:3512628	Cbx6	chromobox 6 [Source:MGI Symbol;Acc:MGI:3512628]	55	178	7.63233	18.21	1.25454
ENSMUST00000022176	ENSMUST00000022176	MGI:96159	Hmgcr	3-hydroxy-3-methylglutaryl-Coenzyme A reductase [Source:MGI Symbol;Acc:MGI:96159]	75	178	10.4077	18.21	0.807076
ENSMUST00000085177	ENSMUST00000085177	MGI:1925103	Msl2	male-specific lethal 2 homolog (Drosophila) [Source:MGI Symbol;Acc:MGI:1925103]	88	178	12.2117	18.21	0.576463
ENSMUST00000131898	ENSMUST00000131898	MGI:1922366	4930520O04Rik	RIKEN cDNA 4930520O04 gene [Source:MGI Symbol;Acc:MGI:1922366]	93	178	12.9056	18.21	0.496736
ENSMUST00000023660	ENSMUST00000023660	MGI:2181192	Ripply3	ripply3 homolog (zebrafish) [Source:MGI Symbol;Acc:MGI:2181192]	95	178	13.1831	18.21	0.466039
ENSMUST00000033776	ENSMUST00000033776	MGI:1861727	Dkc1	dyskeratosis congenita 1, dyskerin [Source:MGI Symbol;Acc:MGI:1861727]	98	178	13.5994	18.21	0.421185
ENSMUST00000117513	ENSMUST00000117513	MGI:1918529	Slc29a3	solute carrier family 29 (nucleoside transporters), member 3 [Source:MGI Symbol;Acc:MGI:1918529]	100	178	13.877	18.21	0.392039
ENSMUST00000133189	ENSMUST00000133189	MGI:1328366	Smarcb1	SWI/SNF related, matrix associated, actin dependent regulator of chromatin, subfamily b, member 1 [Source:MGI Symbol;Acc:MGI:1328366]	102	178	14.1545	18.21	0.36347
ENSMUST00000130024	ENSMUST00000130024	MGI:2448554	Nbeal2	neurobeachin-like 2 [Source:MGI Symbol;Acc:MGI:2448554]	103	178	14.2933	18.21	0.349395
ENSMUST00000091252	ENSMUST00000091252	MGI:2139207	Sec16a	SEC16 homolog A (S. cerevisiae) [Source:MGI Symbol;Acc:MGI:2139207]	114	178	15.8197	18.21	0.203005
ENSMUST00000181732	ENSMUST00000181732		CT010583.1		115	178	15.9585	18.21	0.190405
ENSMUST00000162331	ENSMUST00000162331	MGI:3801816	Gm15812	predicted gene 15812 [Source:MGI Symbol;Acc:MGI:3801816]	128	178	17.7625	18.21	0.035895
ENSMUST00000183317	ENSMUST00000183317	MGI:108027	Ptprv	protein tyrosine phosphatase, receptor type, V [Source:MGI Symbol;Acc:MGI:108027]	132	178	18.3176	18.21	-0.00849908
ENSMUST00000131721	ENSMUST00000131721	MGI:2142346	Strn4	striatin, calmodulin binding protein 4 [Source:MGI Symbol;Acc:MGI:2142346]	154	178	21.3705	18.21	-0.230891
ENSMUST00000029180	ENSMUST00000029180	MGI:1917720	Rprd1b	regulation of nuclear pre-mRNA domain containing 1B [Source:MGI Symbol;Acc:MGI:1917720]	37	177	5.13448	18.1077	1.81831
ENSMUST00000171352	ENSMUST00000171352	MGI:99638	Mark2	MAP/microtubule affinity-regulating kinase 2 [Source:MGI Symbol;Acc:MGI:99638]	55	177	7.63233	18.1077	1.24641
ENSMUST00000023074	ENSMUST00000023074	MGI:2158329	Parvg	parvin, gamma [Source:MGI Symbol;Acc:MGI:2158329]	63	177	8.74249	18.1077	1.05049
ENSMUST00000006911	ENSMUST00000006911	MGI:88357	Cdk4	cyclin-dependent kinase 4 [Source:MGI Symbol;Acc:MGI:88357]	65	177	9.02003	18.1077	1.0054
ENSMUST00000032168	ENSMUST00000032168	MGI:1858417	Sec61a1	Sec61 alpha 1 subunit (S. cerevisiae) [Source:MGI Symbol;Acc:MGI:1858417]	68	177	9.43634	18.1077	0.940304
ENSMUST00000141201	ENSMUST00000141201	MGI:1915851	Qars	glutaminyl-tRNA synthetase [Source:MGI Symbol;Acc:MGI:1915851]	71	177	9.85265	18.1077	0.87802
ENSMUST00000180958	ENSMUST00000180958		AC092094.1		85	177	11.7954	18.1077	0.618376
ENSMUST00000167927	ENSMUST00000167927	MGI:1919449	Mms19	MMS19 (MET18 S. cerevisiae) [Source:MGI Symbol;Acc:MGI:1919449]	85	177	11.7954	18.1077	0.618376
ENSMUST00000108180	ENSMUST00000108180	MGI:894679	Bach2	BTB and CNC homology 2 [Source:MGI Symbol;Acc:MGI:894679]	86	177	11.9342	18.1077	0.601502
ENSMUST00000162848	ENSMUST00000162848	MGI:1336155	Lss	lanosterol synthase [Source:MGI Symbol;Acc:MGI:1336155]	96	177	13.3219	18.1077	0.442805
ENSMUST00000086209	ENSMUST00000086209	MGI:1098272	Rnasel	ribonuclease L (2', 5'-oligoisoadenylate synthetase-dependent) [Source:MGI Symbol;Acc:MGI:1098272]	104	177	14.4321	18.1077	0.327327
ENSMUST00000175279	ENSMUST00000175279	MGI:5455079	Gm25302	predicted gene, 25302 [Source:MGI Symbol;Acc:MGI:5455079]	114	177	15.8197	18.1077	0.194877
ENSMUST00000151582	ENSMUST00000151582	MGI:1859333	Nfat5	nuclear factor of activated T cells 5 [Source:MGI Symbol;Acc:MGI:1859333]	118	177	16.3748	18.1077	0.145124
ENSMUST00000181367	ENSMUST00000181367		BX890553.1		164	177	22.7582	18.1077	-0.329785
ENSMUST00000180761	ENSMUST00000180761		AC111120.1		259	177	35.9414	18.1077	-0.989041
ENSMUST00000041606	ENSMUST00000041606	MGI:1916602	Necab1	N-terminal EF-hand calcium binding protein 1 [Source:MGI Symbol;Acc:MGI:1916602]	85	176	11.7954	18.0054	0.610202
ENSMUST00000047875	ENSMUST00000047875	MGI:1195261	Eef2k	eukaryotic elongation factor-2 kinase [Source:MGI Symbol;Acc:MGI:1195261]	88	176	12.2117	18.0054	0.560162
ENSMUST00000017851	ENSMUST00000017851	MGI:1349457	Serinc3	serine incorporator 3 [Source:MGI Symbol;Acc:MGI:1349457]	90	176	12.4893	18.0054	0.52774
ENSMUST00000024887	ENSMUST00000024887	MGI:1920944	Ndufaf7	NADH dehydrogenase (ubiquinone) 1 alpha subcomplex assembly factor 7 [Source:MGI Symbol;Acc:MGI:1920944]	92	176	12.7668	18.0054	0.496031
ENSMUST00000027736	ENSMUST00000027736	MGI:1917829	Zc3h11a	zinc finger CCCH type containing 11A [Source:MGI Symbol;Acc:MGI:1917829]	93	176	12.9056	18.0054	0.480434
ENSMUST00000045229	ENSMUST00000045229	MGI:2444946	Tmco3	transmembrane and coiled-coil domains 3 [Source:MGI Symbol;Acc:MGI:2444946]	101	176	14.0157	18.0054	0.361382
ENSMUST00000035484	ENSMUST00000035484	MGI:2448759	Cdv3	carnitine deficiency-associated gene expressed in ventricle 3 [Source:MGI Symbol;Acc:MGI:2448759]	134	176	18.5951	18.0054	-0.046496
ENSMUST00000076383	ENSMUST00000076383	MGI:2144023	Fbxw11	F-box and WD-40 domain protein 11 [Source:MGI Symbol;Acc:MGI:2144023]	36	175	4.99571	17.9031	1.84145
ENSMUST00000109910	ENSMUST00000109910	MGI:97307	Nf2	neurofibromatosis 2 [Source:MGI Symbol;Acc:MGI:97307]	55	175	7.63233	17.9031	1.23001
ENSMUST00000029164	ENSMUST00000029164	MGI:1925049	Sla2	Src-like-adaptor 2 [Source:MGI Symbol;Acc:MGI:1925049]	58	175	8.04864	17.9031	1.15339
ENSMUST00000164235	ENSMUST00000164235	MGI:2444022	Mapk1ip1l	mitogen-activated protein kinase 1 interacting protein 1-like [Source:MGI Symbol;Acc:MGI:2444022]	60	175	8.32618	17.9031	1.10448
ENSMUST00000107537	ENSMUST00000107537	MGI:105098	Ube3a	ubiquitin protein ligase E3A [Source:MGI Symbol;Acc:MGI:105098]	63	175	8.74249	17.9031	1.03409
ENSMUST00000068452	ENSMUST00000068452	MGI:2442402	Cnot1	CCR4-NOT transcription complex, subunit 1 [Source:MGI Symbol;Acc:MGI:2442402]	78	175	10.824	17.9031	0.725971
ENSMUST00000044622	ENSMUST00000044622	MGI:1918673	Epg5	ectopic P-granules autophagy protein 5 homolog (C. elegans) [Source:MGI Symbol;Acc:MGI:1918673]	81	175	11.2403	17.9031	0.671523
ENSMUST00000071781	ENSMUST00000071781	MGI:3704342	Gm10123	predicted pseudogene 10123 [Source:MGI Symbol;Acc:MGI:3704342]	82	175	11.3791	17.9031	0.653821
ENSMUST00000072572	ENSMUST00000072572	MGI:2142632	Alg11	asparagine-linked glycosylation 11 (alpha-1,2-mannosyltransferase) [Source:MGI Symbol;Acc:MGI:2142632]	84	175	11.6567	17.9031	0.619055
ENSMUST00000042990	ENSMUST00000042990	MGI:1914120	Serbp1	serpine1 mRNA binding protein 1 [Source:MGI Symbol;Acc:MGI:1914120]	86	175	11.9342	17.9031	0.585108
ENSMUST00000030076	ENSMUST00000030076	MGI:1923334	Ptbp3	polypyrimidine tract binding protein 3 [Source:MGI Symbol;Acc:MGI:1923334]	87	175	12.073	17.9031	0.568429
ENSMUST00000033160	ENSMUST00000033160	MGI:1921355	Gga2	golgi associated, gamma adaptin ear containing, ARF binding protein 2 [Source:MGI Symbol;Acc:MGI:1921355]	96	175	13.3219	17.9031	0.42641
ENSMUST00000030948	ENSMUST00000030948	MGI:94941	Dvl1	dishevelled, dsh homolog 1 (Drosophila) [Source:MGI Symbol;Acc:MGI:94941]	102	175	14.1545	17.9031	0.338947
ENSMUST00000096257	ENSMUST00000096257	MGI:1916102	Lrrn4cl	LRRN4 C-terminal like [Source:MGI Symbol;Acc:MGI:1916102]	105	175	14.5708	17.9031	0.297127
ENSMUST00000132629	ENSMUST00000132629	MGI:2143535	Upb1	ureidopropionase, beta [Source:MGI Symbol;Acc:MGI:2143535]	117	175	16.2361	17.9031	0.141008
ENSMUST00000027810	ENSMUST00000027810	MGI:95530	Fh1	fumarate hydratase 1 [Source:MGI Symbol;Acc:MGI:95530]	132	175	18.3176	17.9031	-0.0330214
ENSMUST00000148923	ENSMUST00000148923	MGI:2441950	Lphn3	latrophilin 3 [Source:MGI Symbol;Acc:MGI:2441950]	279	175	38.7168	17.9031	-1.11275
ENSMUST00000068822	ENSMUST00000068822	MGI:99181	Zfp37	zinc finger protein 37 [Source:MGI Symbol;Acc:MGI:99181]	382	175	53.01	17.9031	-1.56606
ENSMUST00000094151	ENSMUST00000094151	MGI:1914224	Rnf187	ring finger protein 187 [Source:MGI Symbol;Acc:MGI:1914224]	59	174	8.18741	17.8008	1.12046
ENSMUST00000049281	ENSMUST00000049281	MGI:1913556	Fam53c	family with sequence similarity 53, member C [Source:MGI Symbol;Acc:MGI:1913556]	59	174	8.18741	17.8008	1.12046
ENSMUST00000108270	ENSMUST00000108270	MGI:95457	Mecom	MDS1 and EVI1 complex locus [Source:MGI Symbol;Acc:MGI:95457]	77	174	10.6853	17.8008	0.736319
ENSMUST00000180819	ENSMUST00000180819		AC025794.1		94	174	13.0444	17.8008	0.448516
ENSMUST00000052449	ENSMUST00000052449	MGI:1891307	Ubn1	ubinuclein 1 [Source:MGI Symbol;Acc:MGI:1891307]	95	174	13.1831	17.8008	0.433249
ENSMUST00000036195	ENSMUST00000036195	MGI:2140361	Slc35d1	solute carrier family 35 (UDP-glucuronic acid/UDP-N-acetylgalactosamine dual transporter), member D1 [Source:MGI Symbol;Acc:MGI:2140361]	102	174	14.1545	17.8008	0.33068
ENSMUST00000069221	ENSMUST00000069221	MGI:1891690	Syncrip	synaptotagmin binding, cytoplasmic RNA interacting protein [Source:MGI Symbol;Acc:MGI:1891690]	103	174	14.2933	17.8008	0.316605
ENSMUST00000181440	ENSMUST00000181440		AC110234.1		107	174	14.8484	17.8008	0.261638
ENSMUST00000017567	ENSMUST00000017567	MGI:1340045	Zfp207	zinc finger protein 207 [Source:MGI Symbol;Acc:MGI:1340045]	112	174	15.5422	17.8008	0.19575
ENSMUST00000023099	ENSMUST00000023099	MGI:1915010	Slc38a2	solute carrier family 38, member 2 [Source:MGI Symbol;Acc:MGI:1915010]	115	174	15.9585	17.8008	0.157615
ENSMUST00000018304	ENSMUST00000018304	MGI:1100846	Med1	mediator complex subunit 1 [Source:MGI Symbol;Acc:MGI:1100846]	117	174	16.2361	17.8008	0.13274
ENSMUST00000112456	ENSMUST00000112456	MGI:1889583	Sh3kbp1	SH3-domain kinase binding protein 1 [Source:MGI Symbol;Acc:MGI:1889583]	120	174	16.6524	17.8008	0.0962145
ENSMUST00000089162	ENSMUST00000089162	MGI:2180139	Edem1	ER degradation enhancer, mannosidase alpha-like 1 [Source:MGI Symbol;Acc:MGI:2180139]	58	173	8.04864	17.6985	1.13681
ENSMUST00000166172	ENSMUST00000166172	MGI:87860	Abl2	v-abl Abelson murine leukemia viral oncogene 2 (arg, Abelson-related gene) [Source:MGI Symbol;Acc:MGI:87860]	71	173	9.85265	17.6985	0.845043
ENSMUST00000015749	ENSMUST00000015749	MGI:106658	Srf	serum response factor [Source:MGI Symbol;Acc:MGI:106658]	71	173	9.85265	17.6985	0.845043
ENSMUST00000044155	ENSMUST00000044155	MGI:1920078	Ubash3b	ubiquitin associated and SH3 domain containing, B [Source:MGI Symbol;Acc:MGI:1920078]	72	173	9.99142	17.6985	0.824865
ENSMUST00000142430	ENSMUST00000142430	MGI:1920344	Sgip1	SH3-domain GRB2-like (endophilin) interacting protein 1 [Source:MGI Symbol;Acc:MGI:1920344]	73	173	10.1302	17.6985	0.804965
ENSMUST00000181501	ENSMUST00000181501		AC148981.1		80	173	11.1016	17.6985	0.672862
ENSMUST00000100127	ENSMUST00000100127	MGI:2444269	Gtdc1	glycosyltransferase-like domain containing 1 [Source:MGI Symbol;Acc:MGI:2444269]	80	173	11.1016	17.6985	0.672862
ENSMUST00000031423	ENSMUST00000031423	MGI:88110	Atp2a2	ATPase, Ca++ transporting, cardiac muscle, slow twitch 2 [Source:MGI Symbol;Acc:MGI:88110]	82	173	11.3791	17.6985	0.637238
ENSMUST00000181580	ENSMUST00000181580		AL772401.1		82	173	11.3791	17.6985	0.637238
ENSMUST00000094962	ENSMUST00000094962	MGI:1924825	Mll5	myeloid/lymphoid or mixed-lineage leukemia 5 [Source:MGI Symbol;Acc:MGI:1924825]	96	173	13.3219	17.6985	0.409827
ENSMUST00000127718	ENSMUST00000127718	MGI:99660	Pola1	polymerase (DNA directed), alpha 1 [Source:MGI Symbol;Acc:MGI:99660]	97	173	13.4607	17.6985	0.394877
ENSMUST00000044338	ENSMUST00000044338	MGI:2673998	Arhgap33	Rho GTPase activating protein 33 [Source:MGI Symbol;Acc:MGI:2673998]	113	173	15.681	17.6985	0.174611
ENSMUST00000133937	ENSMUST00000133937	MGI:2444772	Zhx3	zinc fingers and homeoboxes 3 [Source:MGI Symbol;Acc:MGI:2444772]	120	173	16.6524	17.6985	0.0878992
ENSMUST00000097953	ENSMUST00000097953	MGI:3642535	Gm10576	predicted gene 10576 [Source:MGI Symbol;Acc:MGI:3642535]	421	173	58.4221	17.6985	-1.72289
ENSMUST00000074628	ENSMUST00000074628	MGI:104709	Wbp2	WW domain binding protein 2 [Source:MGI Symbol;Acc:MGI:104709]	47	172	6.52218	17.5962	1.43184
ENSMUST00000035840	ENSMUST00000035840	MGI:1923573	Zdhhc5	zinc finger, DHHC domain containing 5 [Source:MGI Symbol;Acc:MGI:1923573]	49	172	6.79972	17.5962	1.37172
ENSMUST00000027367	ENSMUST00000027367	MGI:2654470	Ctdsp1	CTD (carboxy-terminal domain, RNA polymerase II, polypeptide A) small phosphatase 1 [Source:MGI Symbol;Acc:MGI:2654470]	53	172	7.3548	17.5962	1.25851
ENSMUST00000030637	ENSMUST00000030637	MGI:1347351	Ncdn	neurochondrin [Source:MGI Symbol;Acc:MGI:1347351]	70	172	9.71388	17.5962	0.857143
ENSMUST00000096053	ENSMUST00000096053	MGI:1924968	Fam178a	family with sequence similarity 178, member A [Source:MGI Symbol;Acc:MGI:1924968]	71	172	9.85265	17.5962	0.836679
ENSMUST00000134528	ENSMUST00000134528	MGI:2442410	Nfrkb	nuclear factor related to kappa B binding protein [Source:MGI Symbol;Acc:MGI:2442410]	72	172	9.99142	17.5962	0.816501
ENSMUST00000001108	ENSMUST00000001108	MGI:87918	Add1	adducin 1 (alpha) [Source:MGI Symbol;Acc:MGI:87918]	78	172	10.824	17.5962	0.701024
ENSMUST00000070181	ENSMUST00000070181	MGI:109235	Itpkb	inositol 1,4,5-trisphosphate 3-kinase B [Source:MGI Symbol;Acc:MGI:109235]	84	172	11.6567	17.5962	0.594109
ENSMUST00000076791	ENSMUST00000076791	MGI:1924293	4632433K11Rik	RIKEN cDNA 4632433K11 gene [Source:MGI Symbol;Acc:MGI:1924293]	86	172	11.9342	17.5962	0.560162
ENSMUST00000072362	ENSMUST00000072362	MGI:109547	Dnm2	dynamin 2 [Source:MGI Symbol;Acc:MGI:109547]	91	172	12.628	17.5962	0.478632
ENSMUST00000151826	ENSMUST00000151826	MGI:1914050	Trp53rk	transformation related protein 53 regulating kinase [Source:MGI Symbol;Acc:MGI:1914050]	96	172	13.3219	17.5962	0.401464
ENSMUST00000182445	ENSMUST00000182445	MGI:1338037	Rbm6	RNA binding motif protein 6 [Source:MGI Symbol;Acc:MGI:1338037]	96	172	13.3219	17.5962	0.401464
ENSMUST00000049020	ENSMUST00000049020	MGI:2667176	Irgq	immunity-related GTPase family, Q [Source:MGI Symbol;Acc:MGI:2667176]	103	172	14.2933	17.5962	0.299926
ENSMUST00000003705	ENSMUST00000003705	MGI:1921518	Aven	apoptosis, caspase activation inhibitor [Source:MGI Symbol;Acc:MGI:1921518]	112	172	15.5422	17.5962	0.179071
ENSMUST00000073889	ENSMUST00000073889	MGI:1196389	Polg	polymerase (DNA directed), gamma [Source:MGI Symbol;Acc:MGI:1196389]	135	172	18.7339	17.5962	-0.0903892
ENSMUST00000125231	ENSMUST00000125231	MGI:1345185	Tenm1	teneurin transmembrane protein 1 [Source:MGI Symbol;Acc:MGI:1345185]	216	172	29.9743	17.5962	-0.768461
ENSMUST00000049583	ENSMUST00000049583	MGI:2682254	Zbtb40	zinc finger and BTB domain containing 40 [Source:MGI Symbol;Acc:MGI:2682254]	57	171	7.90987	17.4939	1.14512
ENSMUST00000031740	ENSMUST00000031740	MGI:106477	Mepce	methylphosphate capping enzyme [Source:MGI Symbol;Acc:MGI:106477]	58	171	8.04864	17.4939	1.12003
ENSMUST00000047145	ENSMUST00000047145	MGI:2384814	Trim41	tripartite motif-containing 41 [Source:MGI Symbol;Acc:MGI:2384814]	65	171	9.02003	17.4939	0.955646
ENSMUST00000033797	ENSMUST00000033797	MGI:1927167	Morf4l2	mortality factor 4 like 2 [Source:MGI Symbol;Acc:MGI:1927167]	82	171	11.3791	17.4939	0.620462
ENSMUST00000047746	ENSMUST00000047746	MGI:2148796	Rnf123	ring finger protein 123 [Source:MGI Symbol;Acc:MGI:2148796]	84	171	11.6567	17.4939	0.585697
ENSMUST00000045312	ENSMUST00000045312	MGI:1344345	Smc1a	structural maintenance of chromosomes 1A [Source:MGI Symbol;Acc:MGI:1344345]	87	171	12.073	17.4939	0.535071
ENSMUST00000053506	ENSMUST00000053506	MGI:1277215	Bbs1	Bardet-Biedl syndrome 1 (human) [Source:MGI Symbol;Acc:MGI:1277215]	87	171	12.073	17.4939	0.535071
ENSMUST00000164309	ENSMUST00000164309	MGI:103197	Mcm5	minichromosome maintenance deficient 5, cell division cycle 46 (S. cerevisiae) [Source:MGI Symbol;Acc:MGI:103197]	90	171	12.4893	17.4939	0.486161
ENSMUST00000014981	ENSMUST00000014981	MGI:1921606	4931428F04Rik	RIKEN cDNA 4931428F04 gene [Source:MGI Symbol;Acc:MGI:1921606]	121	171	16.7911	17.4939	0.0591509
ENSMUST00000071857	ENSMUST00000071857	MGI:107576	Sipa1	signal-induced proliferation associated gene 1 [Source:MGI Symbol;Acc:MGI:107576]	122	171	16.9299	17.4939	0.0472768
ENSMUST00000092973	ENSMUST00000092973	MGI:2443290	Cntrob	centrobin, centrosomal BRCA2 interacting protein [Source:MGI Symbol;Acc:MGI:2443290]	76	170	10.5465	17.3916	0.721625
ENSMUST00000005003	ENSMUST00000005003	MGI:2138281	Lbr	lamin B receptor [Source:MGI Symbol;Acc:MGI:2138281]	86	170	11.9342	17.3916	0.543288
ENSMUST00000043126	ENSMUST00000043126	MGI:1929915	Ncoa6	nuclear receptor coactivator 6 [Source:MGI Symbol;Acc:MGI:1929915]	86	170	11.9342	17.3916	0.543288
ENSMUST00000031256	ENSMUST00000031256	MGI:1100819	Aff1	AF4/FMR2 family, member 1 [Source:MGI Symbol;Acc:MGI:1100819]	90	170	12.4893	17.3916	0.477699
ENSMUST00000061688	ENSMUST00000061688	MGI:3583895	9030025P20Rik	RIKEN cDNA 9030025P20 gene [Source:MGI Symbol;Acc:MGI:3583895]	94	170	13.0444	17.3916	0.414964
ENSMUST00000114313	ENSMUST00000114313	MGI:1336166	Cflar	CASP8 and FADD-like apoptosis regulator [Source:MGI Symbol;Acc:MGI:1336166]	94	170	13.0444	17.3916	0.414964
ENSMUST00000085546	ENSMUST00000085546	MGI:96113	Hmgb1	high mobility group box 1 [Source:MGI Symbol;Acc:MGI:96113]	100	170	13.877	17.3916	0.325696
ENSMUST00000078286	ENSMUST00000078286	MGI:1913479	Rpl7l1	ribosomal protein L7-like 1 [Source:MGI Symbol;Acc:MGI:1913479]	105	170	14.5708	17.3916	0.255307
ENSMUST00000167242	ENSMUST00000167242	MGI:1929705	Xpo7	exportin 7 [Source:MGI Symbol;Acc:MGI:1929705]	109	170	15.1259	17.3916	0.201368
ENSMUST00000020843	ENSMUST00000020843	MGI:108451	Acaca	acetyl-Coenzyme A carboxylase alpha [Source:MGI Symbol;Acc:MGI:108451]	119	170	16.5136	17.3916	0.0747348
ENSMUST00000181184	ENSMUST00000181184		AC157278.1		238	170	33.0272	17.3916	-0.925265
ENSMUST00000071885	ENSMUST00000071885	MGI:3579898	Rhox8	reproductive homeobox 8 [Source:MGI Symbol;Acc:MGI:3579898]	279	170	38.7168	17.3916	-1.15457
ENSMUST00000023759	ENSMUST00000023759	MGI:1933623	Smarcd1	SWI/SNF related, matrix associated, actin dependent regulator of chromatin, subfamily d, member 1 [Source:MGI Symbol;Acc:MGI:1933623]	32	169	4.44063	17.2893	1.96104
ENSMUST00000008284	ENSMUST00000008284	MGI:1916933	Emc10	ER membrane protein complex subunit 10 [Source:MGI Symbol;Acc:MGI:1916933]	38	169	5.27325	17.2893	1.71311
ENSMUST00000039922	ENSMUST00000039922	MGI:1345643	Sufu	suppressor of fused homolog (Drosophila) [Source:MGI Symbol;Acc:MGI:1345643]	44	169	6.10587	17.2893	1.50161
ENSMUST00000011896	ENSMUST00000011896	MGI:97552	Pgam1	phosphoglycerate mutase 1 [Source:MGI Symbol;Acc:MGI:97552]	64	169	8.88126	17.2893	0.961041
ENSMUST00000145385	ENSMUST00000145385	MGI:98227	Sag	retinal S-antigen [Source:MGI Symbol;Acc:MGI:98227]	85	169	11.7954	17.2893	0.55165
ENSMUST00000074144	ENSMUST00000074144	MGI:91860	Dcaf8	DDB1 and CUL4 associated factor 8 [Source:MGI Symbol;Acc:MGI:91860]	95	169	13.1831	17.2893	0.391185
ENSMUST00000175119	ENSMUST00000175119	MGI:5455256	Gm25479	predicted gene, 25479 [Source:MGI Symbol;Acc:MGI:5455256]	97	169	13.4607	17.2893	0.361128
ENSMUST00000136126	ENSMUST00000136126	MGI:2659071	Rapgef2	Rap guanine nucleotide exchange factor (GEF) 2 [Source:MGI Symbol;Acc:MGI:2659071]	99	169	13.7382	17.2893	0.331684
ENSMUST00000153797	ENSMUST00000153797	MGI:2448478	BC016548	cDNA sequence BC016548 [Source:MGI Symbol;Acc:MGI:2448478]	111	169	15.4034	17.2893	0.166625
ENSMUST00000066505	ENSMUST00000066505	MGI:3642216	Gm9924	predicted gene 9924 [Source:MGI Symbol;Acc:MGI:3642216]	119	169	16.5136	17.2893	0.0662233
ENSMUST00000023918	ENSMUST00000023918	MGI:2152389	Ivns1abp	influenza virus NS1A binding protein [Source:MGI Symbol;Acc:MGI:2152389]	128	169	17.7625	17.2893	-0.038959
ENSMUST00000026427	ENSMUST00000026427	MGI:1344426	Esyt1	extended synaptotagmin-like protein 1 [Source:MGI Symbol;Acc:MGI:1344426]	144	169	19.9828	17.2893	-0.208884
ENSMUST00000064924	ENSMUST00000064924	MGI:2146156	Espl1	extra spindle poles-like 1 (S. cerevisiae) [Source:MGI Symbol;Acc:MGI:2146156]	149	169	20.6767	17.2893	-0.258127
ENSMUST00000117448	ENSMUST00000117448	MGI:3647901	Gm7416	predicted gene 7416 [Source:MGI Symbol;Acc:MGI:3647901]	210	169	29.1416	17.2893	-0.753204
ENSMUST00000178024	ENSMUST00000178024	MGI:3642025	G530012D18Rik	RIKEN cDNA G530012D1 gene [Source:MGI Symbol;Acc:MGI:3642025]	213	169	29.558	17.2893	-0.773669
ENSMUST00000158604	ENSMUST00000158604	MGI:5454820	Gm25043	predicted gene, 25043 [Source:MGI Symbol;Acc:MGI:5454820]	31	168	4.30186	17.187	1.99828
ENSMUST00000046950	ENSMUST00000046950	MGI:2444341	Phf8	PHD finger protein 8 [Source:MGI Symbol;Acc:MGI:2444341]	53	168	7.3548	17.187	1.22456
ENSMUST00000030757	ENSMUST00000030757	MGI:1924992	Fbxo42	F-box protein 42 [Source:MGI Symbol;Acc:MGI:1924992]	54	168	7.49356	17.187	1.19759
ENSMUST00000061552	ENSMUST00000061552	MGI:2442366	C230081A13Rik	RIKEN cDNA C230081A13 gene [Source:MGI Symbol;Acc:MGI:2442366]	58	168	8.04864	17.187	1.0945
ENSMUST00000130411	ENSMUST00000130411	MGI:1915246	Srsf6	serine/arginine-rich splicing factor 6 [Source:MGI Symbol;Acc:MGI:1915246]	64	168	8.88126	17.187	0.952479
ENSMUST00000021706	ENSMUST00000021706	MGI:108041	Traf3	TNF receptor-associated factor 3 [Source:MGI Symbol;Acc:MGI:108041]	70	168	9.71388	17.187	0.823196
ENSMUST00000181052	ENSMUST00000181052		AC183097.1		72	168	9.99142	17.187	0.782554
ENSMUST00000026823	ENSMUST00000026823	MGI:1333114	Pigq	phosphatidylinositol glycan anchor biosynthesis, class Q [Source:MGI Symbol;Acc:MGI:1333114]	78	168	10.824	17.187	0.667077
ENSMUST00000048896	ENSMUST00000048896	MGI:104648	Fbrs	fibrosin [Source:MGI Symbol;Acc:MGI:104648]	78	168	10.824	17.187	0.667077
ENSMUST00000079866	ENSMUST00000079866	MGI:98283	Srsf1	serine/arginine-rich splicing factor 1 [Source:MGI Symbol;Acc:MGI:98283]	85	168	11.7954	17.187	0.543088
ENSMUST00000135586	ENSMUST00000135586	MGI:2444557	Suv420h1	suppressor of variegation 4-20 homolog 1 (Drosophila) [Source:MGI Symbol;Acc:MGI:2444557]	89	168	12.3505	17.187	0.476746
ENSMUST00000139730	ENSMUST00000139730	MGI:98790	Top2a	topoisomerase (DNA) II alpha [Source:MGI Symbol;Acc:MGI:98790]	97	168	13.4607	17.187	0.352566
ENSMUST00000151174	ENSMUST00000151174	MGI:106612	Myo1c	myosin IC [Source:MGI Symbol;Acc:MGI:106612]	105	168	14.5708	17.187	0.238234
ENSMUST00000022865	ENSMUST00000022865	MGI:1914404	Mtdh	metadherin [Source:MGI Symbol;Acc:MGI:1914404]	110	168	15.2647	17.187	0.171119
ENSMUST00000139315	ENSMUST00000139315	MGI:894286	P4ha2	procollagen-proline, 2-oxoglutarate 4-dioxygenase (proline 4-hydroxylase), alpha II polypeptide [Source:MGI Symbol;Acc:MGI:894286]	114	168	15.8197	17.187	0.119589
ENSMUST00000023442	ENSMUST00000023442	MGI:1921935	4930451C15Rik	RIKEN cDNA 4930451C15 gene [Source:MGI Symbol;Acc:MGI:1921935]	180	168	24.9785	17.187	-0.539374
ENSMUST00000005164	ENSMUST00000005164	MGI:97594	Prkacb	protein kinase, cAMP dependent, catalytic, beta [Source:MGI Symbol;Acc:MGI:97594]	24	167	3.33047	17.0847	2.3589
ENSMUST00000040336	ENSMUST00000040336	MGI:1920352	Slc22a23	solute carrier family 22, member 23 [Source:MGI Symbol;Acc:MGI:1920352]	56	167	7.7711	17.0847	1.13651
ENSMUST00000033818	ENSMUST00000033818	MGI:1354735	Atp11a	ATPase, class VI, type 11A [Source:MGI Symbol;Acc:MGI:1354735]	69	167	9.57511	17.0847	0.835341
ENSMUST00000094077	ENSMUST00000094077	MGI:2448492	Kdm6b	KDM1 lysine (K)-specific demethylase 6B [Source:MGI Symbol;Acc:MGI:2448492]	71	167	9.85265	17.0847	0.794119
ENSMUST00000119921	ENSMUST00000119921	MGI:1913704	Nmnat1	nicotinamide nucleotide adenylyltransferase 1 [Source:MGI Symbol;Acc:MGI:1913704]	79	167	10.9628	17.0847	0.640085
ENSMUST00000098312	ENSMUST00000098312	MGI:2142527	Exoc8	exocyst complex component 8 [Source:MGI Symbol;Acc:MGI:2142527]	81	167	11.2403	17.0847	0.604016
ENSMUST00000127373	ENSMUST00000127373	MGI:1914090	Wdr45b	WD repeat domain 45B [Source:MGI Symbol;Acc:MGI:1914090]	84	167	11.6567	17.0847	0.551548
ENSMUST00000003908	ENSMUST00000003908	MGI:894676	Mast2	microtubule associated serine/threonine kinase 2 [Source:MGI Symbol;Acc:MGI:894676]	91	167	12.628	17.0847	0.436071
ENSMUST00000059647	ENSMUST00000059647	MGI:1922960	Rbm12	RNA binding motif protein 12 [Source:MGI Symbol;Acc:MGI:1922960]	95	167	13.1831	17.0847	0.37401
ENSMUST00000141006	ENSMUST00000141006	MGI:3039592	Fads6	fatty acid desaturase domain family, member 6 [Source:MGI Symbol;Acc:MGI:3039592]	96	167	13.3219	17.0847	0.358903
ENSMUST00000124292	ENSMUST00000124292	MGI:99907	Plod1	procollagen-lysine, 2-oxoglutarate 5-dioxygenase 1 [Source:MGI Symbol;Acc:MGI:99907]	100	167	13.877	17.0847	0.30001
ENSMUST00000057793	ENSMUST00000057793	MGI:1338758	Adnp	activity-dependent neuroprotective protein [Source:MGI Symbol;Acc:MGI:1338758]	100	167	13.877	17.0847	0.30001
ENSMUST00000087210	ENSMUST00000087210	MGI:1289273	Ppp1r10	protein phosphatase 1, regulatory subunit 10 [Source:MGI Symbol;Acc:MGI:1289273]	118	167	16.3748	17.0847	0.0612229
ENSMUST00000100507	ENSMUST00000100507	MGI:106478	Eif3b	eukaryotic translation initiation factor 3, subunit B [Source:MGI Symbol;Acc:MGI:106478]	134	167	18.5951	17.0847	-0.122223
ENSMUST00000000137	ENSMUST00000000137	MGI:1913963	Actr2	ARP2 actin-related protein 2 [Source:MGI Symbol;Acc:MGI:1913963]	38	166	5.27325	16.9824	1.68727
ENSMUST00000007961	ENSMUST00000007961	MGI:3040693	Zmiz1	zinc finger, MIZ-type containing 1 [Source:MGI Symbol;Acc:MGI:3040693]	60	166	8.32618	16.9824	1.02831
ENSMUST00000122255	ENSMUST00000122255	MGI:1917711	Crtc3	CREB regulated transcription coactivator 3 [Source:MGI Symbol;Acc:MGI:1917711]	63	166	8.74249	16.9824	0.957921
ENSMUST00000086900	ENSMUST00000086900	MGI:1355299	Hnrpdl	heterogeneous nuclear ribonucleoprotein D-like [Source:MGI Symbol;Acc:MGI:1355299]	73	166	10.1302	16.9824	0.745376
ENSMUST00000079031	ENSMUST00000079031	MGI:2153589	Acap3	ArfGAP with coiled-coil, ankyrin repeat and PH domains 3 [Source:MGI Symbol;Acc:MGI:2153589]	76	166	10.5465	16.9824	0.687274
ENSMUST00000045994	ENSMUST00000045994	MGI:1098653	Rbm34	RNA binding motif protein 34 [Source:MGI Symbol;Acc:MGI:1098653]	83	166	11.5179	16.9824	0.560162
ENSMUST00000072357	ENSMUST00000072357	MGI:96103	Hk1	hexokinase 1 [Source:MGI Symbol;Acc:MGI:96103]	86	166	11.9342	16.9824	0.508936
ENSMUST00000156852	ENSMUST00000156852	MGI:1919908	2700097O09Rik	RIKEN cDNA 2700097O09 gene [Source:MGI Symbol;Acc:MGI:1919908]	90	166	12.4893	16.9824	0.443348
ENSMUST00000051395	ENSMUST00000051395	MGI:2444496	Prr11	proline rich 11 [Source:MGI Symbol;Acc:MGI:2444496]	91	166	12.628	16.9824	0.427406
ENSMUST00000044833	ENSMUST00000044833	MGI:2180850	Oas3	2'-5' oligoadenylate synthetase 3 [Source:MGI Symbol;Acc:MGI:2180850]	98	166	13.5994	16.9824	0.320491
ENSMUST00000138502	ENSMUST00000138502	MGI:1914677	Rps20	ribosomal protein S20 [Source:MGI Symbol;Acc:MGI:1914677]	102	166	14.1545	16.9824	0.262776
ENSMUST00000178280	ENSMUST00000178280	MGI:1860086	Crlf3	cytokine receptor-like factor 3 [Source:MGI Symbol;Acc:MGI:1860086]	112	166	15.5422	16.9824	0.127846
ENSMUST00000181450	ENSMUST00000181450	MGI:3704238	4921514A10Rik	RIKEN cDNA 4921514A10 gene [Source:MGI Symbol;Acc:MGI:3704238]	115	166	15.9585	16.9824	0.089711
ENSMUST00000138827	ENSMUST00000138827	MGI:1098684	Eif2a	eukaryotic translation initiation factor 2A [Source:MGI Symbol;Acc:MGI:1098684]	142	166	19.7053	16.9824	-0.214546
ENSMUST00000025679	ENSMUST00000025679	MGI:2147616	Otub1	OTU domain, ubiquitin aldehyde binding 1 [Source:MGI Symbol;Acc:MGI:2147616]	35	165	4.85694	16.8801	1.7972
ENSMUST00000099991	ENSMUST00000099991	MGI:2445095	Lrrc33	leucine rich repeat containing 33 [Source:MGI Symbol;Acc:MGI:2445095]	37	165	5.13448	16.8801	1.71703
ENSMUST00000088494	ENSMUST00000088494	MGI:1858907	Blcap	bladder cancer associated protein homolog (human) [Source:MGI Symbol;Acc:MGI:1858907]	39	165	5.41202	16.8801	1.64108
ENSMUST00000030578	ENSMUST00000030578	MGI:1277117	Ptp4a2	protein tyrosine phosphatase 4a2 [Source:MGI Symbol;Acc:MGI:1277117]	41	165	5.68956	16.8801	1.56893
ENSMUST00000159086	ENSMUST00000159086	MGI:1921793	Zfp871	zinc finger protein 871 [Source:MGI Symbol;Acc:MGI:1921793]	43	165	5.9671	16.8801	1.50022
ENSMUST00000148085	ENSMUST00000148085	MGI:106906	Eif4a2	eukaryotic translation initiation factor 4A2 [Source:MGI Symbol;Acc:MGI:106906]	52	165	7.21603	16.8801	1.22604
ENSMUST00000074991	ENSMUST00000074991	MGI:2445179	Tmem184b	transmembrane protein 184b [Source:MGI Symbol;Acc:MGI:2445179]	52	165	7.21603	16.8801	1.22604
ENSMUST00000033609	ENSMUST00000033609	MGI:1343054	Cstf2	cleavage stimulation factor, 3' pre-RNA subunit 2 [Source:MGI Symbol;Acc:MGI:1343054]	55	165	7.63233	16.8801	1.14512
ENSMUST00000004203	ENSMUST00000004203	MGI:2178445	Ppan	peter pan homolog (Drosophila) [Source:MGI Symbol;Acc:MGI:2178445]	70	165	9.71388	16.8801	0.797201
ENSMUST00000143616	ENSMUST00000143616	MGI:1098826	Coq4	coenzyme Q4 homolog (yeast) [Source:MGI Symbol;Acc:MGI:1098826]	77	165	10.6853	16.8801	0.659697
ENSMUST00000041616	ENSMUST00000041616	MGI:1351869	Pdxk	pyridoxal (pyridoxine, vitamin B6) kinase [Source:MGI Symbol;Acc:MGI:1351869]	79	165	10.9628	16.8801	0.622703
ENSMUST00000146069	ENSMUST00000146069	MGI:2660884	Csnk1g1	casein kinase 1, gamma 1 [Source:MGI Symbol;Acc:MGI:2660884]	82	165	11.3791	16.8801	0.568932
ENSMUST00000123037	ENSMUST00000123037	MGI:1344407	Zeb2	zinc finger E-box binding homeobox 2 [Source:MGI Symbol;Acc:MGI:1344407]	90	165	12.4893	16.8801	0.434631
ENSMUST00000180800	ENSMUST00000180800		AC131759.1		90	165	12.4893	16.8801	0.434631
ENSMUST00000123318	ENSMUST00000123318	MGI:3802002	Gm15965	predicted gene 15965 [Source:MGI Symbol;Acc:MGI:3802002]	93	165	12.9056	16.8801	0.387325
ENSMUST00000154633	ENSMUST00000154633	MGI:1196293	Tubgcp4	tubulin, gamma complex associated protein 4 [Source:MGI Symbol;Acc:MGI:1196293]	94	165	13.0444	16.8801	0.371895
ENSMUST00000159758	ENSMUST00000159758	MGI:1923784	Osbpl9	oxysterol binding protein-like 9 [Source:MGI Symbol;Acc:MGI:1923784]	95	165	13.1831	16.8801	0.356628
ENSMUST00000074669	ENSMUST00000074669	MGI:1330294	Hnrnpab	heterogeneous nuclear ribonucleoprotein A/B [Source:MGI Symbol;Acc:MGI:1330294]	98	165	13.5994	16.8801	0.311774
ENSMUST00000029694	ENSMUST00000029694	MGI:103264	Arhgef2	rho/rac guanine nucleotide exchange factor (GEF) 2 [Source:MGI Symbol;Acc:MGI:103264]	101	165	14.0157	16.8801	0.268272
ENSMUST00000127960	ENSMUST00000127960	MGI:3612472	Pisd-ps2	phosphatidylserine decarboxylase, pseudogene 2 [Source:MGI Symbol;Acc:MGI:3612472]	108	165	14.9871	16.8801	0.171596
ENSMUST00000028844	ENSMUST00000028844	MGI:1913802	Sppl2a	signal peptide peptidase like 2A [Source:MGI Symbol;Acc:MGI:1913802]	114	165	15.8197	16.8801	0.0935938
ENSMUST00000107359	ENSMUST00000107359	MGI:1918264	Megf9	multiple EGF-like-domains 9 [Source:MGI Symbol;Acc:MGI:1918264]	134	165	18.5951	16.8801	-0.139605
ENSMUST00000044492	ENSMUST00000044492	MGI:2178217	Akap9	A kinase (PRKA) anchor protein (yotiao) 9 [Source:MGI Symbol;Acc:MGI:2178217]	139	165	19.289	16.8801	-0.192457
ENSMUST00000088174	ENSMUST00000088174	MGI:1354958	Hs6st1	heparan sulfate 6-O-sulfotransferase 1 [Source:MGI Symbol;Acc:MGI:1354958]	52	164	7.21603	16.7778	1.21727
ENSMUST00000099276	ENSMUST00000099276	MGI:1914971	Atxn7l3b	ataxin 7-like 3B [Source:MGI Symbol;Acc:MGI:1914971]	59	164	8.18741	16.7778	1.03507
ENSMUST00000117551	ENSMUST00000117551	MGI:1197013	Rasa3	RAS p21 protein activator 3 [Source:MGI Symbol;Acc:MGI:1197013]	61	164	8.46495	16.7778	0.986976
ENSMUST00000147894	ENSMUST00000147894	MGI:2156057	Dclre1b	DNA cross-link repair 1B, PSO2 homolog (S. cerevisiae) [Source:MGI Symbol;Acc:MGI:2156057]	82	164	11.3791	16.7778	0.560162
ENSMUST00000088911	ENSMUST00000088911	MGI:1924161	Brd1	bromodomain containing 1 [Source:MGI Symbol;Acc:MGI:1924161]	83	164	11.5179	16.7778	0.542674
ENSMUST00000175659	ENSMUST00000175659	MGI:1346056	Ctage5	CTAGE family, member 5 [Source:MGI Symbol;Acc:MGI:1346056]	84	164	11.6567	16.7778	0.525396
ENSMUST00000019266	ENSMUST00000019266	MGI:104533	Ccl9	chemokine (C-C motif) ligand 9 [Source:MGI Symbol;Acc:MGI:104533]	91	164	12.628	16.7778	0.409919
ENSMUST00000106245	ENSMUST00000106245	MGI:2444688	Endov	endonuclease V [Source:MGI Symbol;Acc:MGI:2444688]	97	164	13.4607	16.7778	0.317801
ENSMUST00000105718	ENSMUST00000105718	MGI:1922865	Zfp933	zinc finger protein 933 [Source:MGI Symbol;Acc:MGI:1922865]	102	164	14.1545	16.7778	0.245288
ENSMUST00000137283	ENSMUST00000137283	MGI:3651764	Gm13029	predicted gene 13029 [Source:MGI Symbol;Acc:MGI:3651764]	133	164	18.4564	16.7778	-0.137569
ENSMUST00000146409	ENSMUST00000146409	MGI:892977	Slc26a2	solute carrier family 26 (sulfate transporter), member 2 [Source:MGI Symbol;Acc:MGI:892977]	143	164	19.8441	16.7778	-0.242158
ENSMUST00000182065	ENSMUST00000182065	MGI:1913954	Rbm4b	RNA binding motif protein 4B [Source:MGI Symbol;Acc:MGI:1913954]	150	164	20.8155	16.7778	-0.311105
ENSMUST00000029885	ENSMUST00000029885	MGI:1917818	Cpne3	copine III [Source:MGI Symbol;Acc:MGI:1917818]	159	164	22.0644	16.7778	-0.395169
ENSMUST00000177330	ENSMUST00000177330	MGI:1278315	Lrp5	low density lipoprotein receptor-related protein 5 [Source:MGI Symbol;Acc:MGI:1278315]	188	164	26.0887	16.7778	-0.636875
ENSMUST00000059680	ENSMUST00000059680	MGI:1913879	Golph3	golgi phosphoprotein 3 [Source:MGI Symbol;Acc:MGI:1913879]	37	163	5.13448	16.6755	1.69944
ENSMUST00000151061	ENSMUST00000151061	MGI:88116	Atp6v0c	ATPase, H+ transporting, lysosomal V0 subunit C [Source:MGI Symbol;Acc:MGI:88116]	47	163	6.52218	16.6755	1.3543
ENSMUST00000032220	ENSMUST00000032220	MGI:1349400	Cops7a	COP9 (constitutive photomorphogenic) homolog, subunit 7a (Arabidopsis thaliana) [Source:MGI Symbol;Acc:MGI:1349400]	54	163	7.49356	16.6755	1.154
ENSMUST00000071889	ENSMUST00000071889	MGI:1923709	Car12	carbonic anyhydrase 12 [Source:MGI Symbol;Acc:MGI:1923709]	63	163	8.74249	16.6755	0.93161
ENSMUST00000110612	ENSMUST00000110612	MGI:1914943	Hypk	huntingtin interacting protein K [Source:MGI Symbol;Acc:MGI:1914943]	67	163	9.29757	16.6755	0.842801
ENSMUST00000130623	ENSMUST00000130623	MGI:1923723	Supt3	suppressor of Ty 3 [Source:MGI Symbol;Acc:MGI:1923723]	69	163	9.57511	16.6755	0.800365
ENSMUST00000025218	ENSMUST00000025218	MGI:2385071	Etf1	eukaryotic translation termination factor 1 [Source:MGI Symbol;Acc:MGI:2385071]	71	163	9.85265	16.6755	0.759143
ENSMUST00000044271	ENSMUST00000044271	MGI:2679787	Nploc4	nuclear protein localization 4 homolog (S. cerevisiae) [Source:MGI Symbol;Acc:MGI:2679787]	75	163	10.4077	16.6755	0.680071
ENSMUST00000025463	ENSMUST00000025463	MGI:3833940	Gm16286	predicted gene 16286 [Source:MGI Symbol;Acc:MGI:3833940]	78	163	10.824	16.6755	0.623488
ENSMUST00000037165	ENSMUST00000037165	MGI:96891	Lyl1	lymphoblastomic leukemia 1 [Source:MGI Symbol;Acc:MGI:96891]	79	163	10.9628	16.6755	0.605109
ENSMUST00000023043	ENSMUST00000023043	MGI:103202	Adsl	adenylosuccinate lyase [Source:MGI Symbol;Acc:MGI:103202]	89	163	12.3505	16.6755	0.433156
ENSMUST00000125800	ENSMUST00000125800	MGI:1928480	Acpp	acid phosphatase, prostate [Source:MGI Symbol;Acc:MGI:1928480]	96	163	13.3219	16.6755	0.323927
ENSMUST00000048657	ENSMUST00000048657	MGI:1919746	Sec24c	Sec24 related gene family, member C (S. cerevisiae) [Source:MGI Symbol;Acc:MGI:1919746]	104	163	14.4321	16.6755	0.20845
ENSMUST00000083888	ENSMUST00000083888	MGI:3645887	Snord15a	small nucleolar RNA, C/D box 15A [Source:MGI Symbol;Acc:MGI:3645887]	26	162	3.60801	16.5732	2.19957
ENSMUST00000049699	ENSMUST00000049699	MGI:3528383	Pskh1	protein serine kinase H1 [Source:MGI Symbol;Acc:MGI:3528383]	34	162	4.71817	16.5732	1.81255
ENSMUST00000126739	ENSMUST00000126739	MGI:2685821	Hjurp	Holliday junction recognition protein [Source:MGI Symbol;Acc:MGI:2685821]	39	162	5.41202	16.5732	1.61461
ENSMUST00000074919	ENSMUST00000074919	MGI:2387357	Wac	WW domain containing adaptor with coiled-coil [Source:MGI Symbol;Acc:MGI:2387357]	60	162	8.32618	16.5732	0.993121
ENSMUST00000024849	ENSMUST00000024849	MGI:2389136	Emilin2	elastin microfibril interfacer 2 [Source:MGI Symbol;Acc:MGI:2389136]	62	162	8.60372	16.5732	0.945815
ENSMUST00000137116	ENSMUST00000137116	MGI:1925831	Utp23	UTP23, small subunit (SSU) processome component, homolog (yeast) [Source:MGI Symbol;Acc:MGI:1925831]	74	162	10.269	16.5732	0.690558
ENSMUST00000020449	ENSMUST00000020449	MGI:2152895	Helb	helicase (DNA) B [Source:MGI Symbol;Acc:MGI:2152895]	75	162	10.4077	16.5732	0.671193
ENSMUST00000024747	ENSMUST00000024747	MGI:103178	Vegfa	vascular endothelial growth factor A [Source:MGI Symbol;Acc:MGI:103178]	78	162	10.824	16.5732	0.614609
ENSMUST00000135680	ENSMUST00000135680	MGI:1928141	Mrps14	mitochondrial ribosomal protein S14 [Source:MGI Symbol;Acc:MGI:1928141]	82	162	11.3791	16.5732	0.54246
ENSMUST00000176366	ENSMUST00000176366	MGI:2444994	A430110C17Rik	RIKEN cDNA A430110C17 gene [Source:MGI Symbol;Acc:MGI:2444994]	83	162	11.5179	16.5732	0.524972
ENSMUST00000066807	ENSMUST00000066807	MGI:1100494	Ercc6	excision repair cross-complementing rodent repair deficiency, complementation group 6 [Source:MGI Symbol;Acc:MGI:1100494]	100	162	13.877	16.5732	0.256155
ENSMUST00000163048	ENSMUST00000163048	MGI:1289274	Krr1	KRR1, small subunit (SSU) processome component, homolog (yeast) [Source:MGI Symbol;Acc:MGI:1289274]	104	162	14.4321	16.5732	0.199572
ENSMUST00000075872	ENSMUST00000075872	MGI:2444584	Mysm1	myb-like, SWIRM and MPN domains 1 [Source:MGI Symbol;Acc:MGI:2444584]	104	162	14.4321	16.5732	0.199572
ENSMUST00000145126	ENSMUST00000145126	MGI:104560	Nsf	N-ethylmaleimide sensitive fusion protein [Source:MGI Symbol;Acc:MGI:104560]	106	162	14.7096	16.5732	0.172091
ENSMUST00000070402	ENSMUST00000070402	MGI:109473	Usp34	ubiquitin specific peptidase 34 [Source:MGI Symbol;Acc:MGI:109473]	114	162	15.8197	16.5732	0.0671216
ENSMUST00000029213	ENSMUST00000029213	MGI:1921864	Ocstamp	osteoclast stimulatory transmembrane protein [Source:MGI Symbol;Acc:MGI:1921864]	119	162	16.5136	16.5732	0.00519385
ENSMUST00000166353	ENSMUST00000166353	MGI:4937036	Gm17402	predicted gene, 17402 [Source:MGI Symbol;Acc:MGI:4937036]	154	162	21.3705	16.5732	-0.366775
ENSMUST00000022419	ENSMUST00000022419	MGI:2145814	Ppif	peptidylprolyl isomerase F (cyclophilin F) [Source:MGI Symbol;Acc:MGI:2145814]	34	161	4.71817	16.4709	1.80362
ENSMUST00000171975	ENSMUST00000171975	MGI:1344363	Arih1	ariadne ubiquitin-conjugating enzyme E2 binding protein homolog 1 (Drosophila) [Source:MGI Symbol;Acc:MGI:1344363]	42	161	5.82833	16.4709	1.49876
ENSMUST00000182761	ENSMUST00000182761		RP23		58	161	8.04864	16.4709	1.0331
ENSMUST00000148900	ENSMUST00000148900	MGI:106498	D4Wsu53e	DNA segment, Chr 4, Wayne State University 53, expressed [Source:MGI Symbol;Acc:MGI:106498]	72	161	9.99142	16.4709	0.721153
ENSMUST00000160982	ENSMUST00000160982	MGI:1914497	Marc2	mitochondrial amidoxime reducing component 2 [Source:MGI Symbol;Acc:MGI:1914497]	84	161	11.6567	16.4709	0.498761
ENSMUST00000130579	ENSMUST00000130579	MGI:2451097	Cndp1	carnosine dipeptidase 1 (metallopeptidase M20 family) [Source:MGI Symbol;Acc:MGI:2451097]	85	161	11.7954	16.4709	0.481688
ENSMUST00000095932	ENSMUST00000095932	MGI:2685134	Ccnb1ip1	cyclin B1 interacting protein 1 [Source:MGI Symbol;Acc:MGI:2685134]	85	161	11.7954	16.4709	0.481688
ENSMUST00000018478	ENSMUST00000018478	MGI:105051	Ksr1	kinase suppressor of ras 1 [Source:MGI Symbol;Acc:MGI:105051]	90	161	12.4893	16.4709	0.399225
ENSMUST00000150024	ENSMUST00000150024	MGI:3652314	Gm13399	predicted gene 13399 [Source:MGI Symbol;Acc:MGI:3652314]	104	161	14.4321	16.4709	0.190639
ENSMUST00000167375	ENSMUST00000167375	MGI:4937048	Gm17414	predicted gene, 17414 [Source:MGI Symbol;Acc:MGI:4937048]	113	161	15.681	16.4709	0.0708995
ENSMUST00000159547	ENSMUST00000159547	MGI:1313276	Vamp1	vesicle-associated membrane protein 1 [Source:MGI Symbol;Acc:MGI:1313276]	181	161	25.1173	16.4709	-0.608767
ENSMUST00000096069	ENSMUST00000096069	MGI:2145274	BC016423	cDNA sequence BC016423 [Source:MGI Symbol;Acc:MGI:2145274]	194	161	26.9213	16.4709	-0.708834
ENSMUST00000130409	ENSMUST00000130409	MGI:1920629	Dcbld2	discoidin, CUB and LCCL domain containing 2 [Source:MGI Symbol;Acc:MGI:1920629]	240	161	33.3047	16.4709	-1.01581
ENSMUST00000118317	ENSMUST00000118317	MGI:1314873	Hipk1	homeodomain interacting protein kinase 1 [Source:MGI Symbol;Acc:MGI:1314873]	32	160	4.44063	16.3685	1.88209
ENSMUST00000056406	ENSMUST00000056406	MGI:2443569	Fam78a	family with sequence similarity 78, member A [Source:MGI Symbol;Acc:MGI:2443569]	41	160	5.68956	16.3685	1.52454
ENSMUST00000090192	ENSMUST00000090192	MGI:109240	Ube2l3	ubiquitin-conjugating enzyme E2L 3 [Source:MGI Symbol;Acc:MGI:109240]	46	160	6.38341	16.3685	1.35853
ENSMUST00000029149	ENSMUST00000029149	MGI:2157953	Rbm39	RNA binding motif protein 39 [Source:MGI Symbol;Acc:MGI:2157953]	78	160	10.824	16.3685	0.596687
ENSMUST00000181885	ENSMUST00000181885		AC119189.1		80	160	11.1016	16.3685	0.560162
ENSMUST00000064097	ENSMUST00000064097	MGI:2443206	8030423F21Rik	RIKEN cDNA 8030423F21 gene [Source:MGI Symbol;Acc:MGI:2443206]	83	160	11.5179	16.3685	0.50705
ENSMUST00000159719	ENSMUST00000159719	MGI:1914447	Zcrb1	zinc finger CCHC-type and RNA binding motif 1 [Source:MGI Symbol;Acc:MGI:1914447]	83	160	11.5179	16.3685	0.50705
ENSMUST00000111610	ENSMUST00000111610	MGI:107795	Hnrnpc	heterogeneous nuclear ribonucleoprotein C [Source:MGI Symbol;Acc:MGI:107795]	85	160	11.7954	16.3685	0.472699
ENSMUST00000053811	ENSMUST00000053811	MGI:1926170	Dlst	dihydrolipoamide S-succinyltransferase (E2 component of 2-oxo-glutarate complex) [Source:MGI Symbol;Acc:MGI:1926170]	85	160	11.7954	16.3685	0.472699
ENSMUST00000130921	ENSMUST00000130921	MGI:1328363	Ccnt1	cyclin T1 [Source:MGI Symbol;Acc:MGI:1328363]	88	160	12.2117	16.3685	0.422658
ENSMUST00000079222	ENSMUST00000079222	MGI:1923272	5830417I10Rik	RIKEN cDNA 5830417I10 gene [Source:MGI Symbol;Acc:MGI:1923272]	89	160	12.3505	16.3685	0.406356
ENSMUST00000026671	ENSMUST00000026671	MGI:1921620	Rptor	regulatory associated protein of MTOR, complex 1 [Source:MGI Symbol;Acc:MGI:1921620]	89	160	12.3505	16.3685	0.406356
ENSMUST00000007130	ENSMUST00000007130	MGI:88276	Ctnnb1	catenin (cadherin associated protein), beta 1 [Source:MGI Symbol;Acc:MGI:88276]	92	160	12.7668	16.3685	0.358528
ENSMUST00000032124	ENSMUST00000032124	MGI:1926274	Mrpl19	mitochondrial ribosomal protein L19 [Source:MGI Symbol;Acc:MGI:1926274]	97	160	13.4607	16.3685	0.282177
ENSMUST00000039280	ENSMUST00000039280	MGI:2146350	Scaf4	SR-related CTD-associated factor 4 [Source:MGI Symbol;Acc:MGI:2146350]	109	160	15.1259	16.3685	0.113905
ENSMUST00000182212	ENSMUST00000182212	MGI:88025	Ank2	ankyrin 2, brain [Source:MGI Symbol;Acc:MGI:88025]	135	160	18.7339	16.3685	-0.194726
ENSMUST00000171802	ENSMUST00000171802	MGI:3045334	Mcmdc2	minichromosome maintenance domain containing 2 [Source:MGI Symbol;Acc:MGI:3045334]	147	160	20.3991	16.3685	-0.317583
ENSMUST00000000122	ENSMUST00000000122	MGI:97323	Ngfr	nerve growth factor receptor (TNFR superfamily, member 16) [Source:MGI Symbol;Acc:MGI:97323]	204	160	28.309	16.3685	-0.790336
ENSMUST00000004381	ENSMUST00000004381	MGI:1315211	Lpcat3	lysophosphatidylcholine acyltransferase 3 [Source:MGI Symbol;Acc:MGI:1315211]	64	159	8.88126	16.2662	0.873045
ENSMUST00000114976	ENSMUST00000114976	MGI:1914228	Luc7l	Luc7 homolog (S. cerevisiae)-like [Source:MGI Symbol;Acc:MGI:1914228]	68	159	9.43634	16.2662	0.785582
ENSMUST00000131719	ENSMUST00000131719	MGI:1915005	Ddx47	DEAD (Asp-Glu-Ala-Asp) box polypeptide 47 [Source:MGI Symbol;Acc:MGI:1915005]	74	159	10.269	16.2662	0.663591
ENSMUST00000123031	ENSMUST00000123031	MGI:1926135	Coro7	coronin 7 [Source:MGI Symbol;Acc:MGI:1926135]	79	159	10.9628	16.2662	0.569264
ENSMUST00000037912	ENSMUST00000037912	MGI:2679255	Ssh2	slingshot homolog 2 (Drosophila) [Source:MGI Symbol;Acc:MGI:2679255]	81	159	11.2403	16.2662	0.533195
ENSMUST00000123237	ENSMUST00000123237	MGI:2159711	Usp33	ubiquitin specific peptidase 33 [Source:MGI Symbol;Acc:MGI:2159711]	82	159	11.3791	16.2662	0.515493
ENSMUST00000025079	ENSMUST00000025079	MGI:2147319	Svil	supervillin [Source:MGI Symbol;Acc:MGI:2147319]	89	159	12.3505	16.2662	0.397311
ENSMUST00000119848	ENSMUST00000119848	MGI:1919889	Eme2	essential meiotic endonuclease 1 homolog 2 (S. pombe) [Source:MGI Symbol;Acc:MGI:1919889]	92	159	12.7668	16.2662	0.349483
ENSMUST00000038213	ENSMUST00000038213	MGI:1926058	Stxbp5	syntaxin binding protein 5 (tomosyn) [Source:MGI Symbol;Acc:MGI:1926058]	96	159	13.3219	16.2662	0.288082
ENSMUST00000039994	ENSMUST00000039994	MGI:108084	Cep250	centrosomal protein 250 [Source:MGI Symbol;Acc:MGI:108084]	128	159	17.7625	16.2662	-0.126955
ENSMUST00000131800	ENSMUST00000131800	MGI:97306	Nf1	neurofibromatosis 1 [Source:MGI Symbol;Acc:MGI:97306]	183	159	25.3949	16.2662	-0.642655
ENSMUST00000004964	ENSMUST00000004964	MGI:97588	Pou1f1	POU domain, class 1, transcription factor 1 [Source:MGI Symbol;Acc:MGI:97588]	191	159	26.505	16.2662	-0.704384
ENSMUST00000172450	ENSMUST00000172450	MGI:108415	Pafah1b2	platelet-activating factor acetylhydrolase, isoform 1b, subunit 2 [Source:MGI Symbol;Acc:MGI:108415]	56	158	7.7711	16.1639	1.05659
ENSMUST00000022993	ENSMUST00000022993	MGI:1915069	Derl1	Der1-like domain family, member 1 [Source:MGI Symbol;Acc:MGI:1915069]	56	158	7.7711	16.1639	1.05659
ENSMUST00000027315	ENSMUST00000027315	MGI:1924514	Zfp142	zinc finger protein 142 [Source:MGI Symbol;Acc:MGI:1924514]	57	158	7.90987	16.1639	1.03105
ENSMUST00000035977	ENSMUST00000035977	MGI:1924261	Ticrr	TOPBP1-interacting checkpoint and replication regulator [Source:MGI Symbol;Acc:MGI:1924261]	61	158	8.46495	16.1639	0.933205
ENSMUST00000040320	ENSMUST00000040320	MGI:105870	Micall1	microtubule associated monooxygenase, calponin and LIM domain containing -like 1 [Source:MGI Symbol;Acc:MGI:105870]	62	158	8.60372	16.1639	0.909746
ENSMUST00000018719	ENSMUST00000018719	MGI:1917176	Dnahc17	dynein, axonemal, heavy chain 17 [Source:MGI Symbol;Acc:MGI:1917176]	64	158	8.88126	16.1639	0.863942
ENSMUST00000032561	ENSMUST00000032561	MGI:109268	Vasp	vasodilator-stimulated phosphoprotein [Source:MGI Symbol;Acc:MGI:109268]	67	158	9.29757	16.1639	0.797853
ENSMUST00000045279	ENSMUST00000045279	MGI:2144404	Jmjd4	jumonji domain containing 4 [Source:MGI Symbol;Acc:MGI:2144404]	70	158	9.71388	16.1639	0.734659
ENSMUST00000149735	ENSMUST00000149735	MGI:107750	Dync1i2	dynein cytoplasmic 1 intermediate chain 2 [Source:MGI Symbol;Acc:MGI:107750]	73	158	10.1302	16.1639	0.674118
ENSMUST00000021666	ENSMUST00000021666	MGI:1349217	Abcd4	ATP-binding cassette, sub-family D (ALD), member 4 [Source:MGI Symbol;Acc:MGI:1349217]	80	158	11.1016	16.1639	0.542014
ENSMUST00000142645	ENSMUST00000142645	MGI:1920243	Appl1	adaptor protein, phosphotyrosine interaction, PH domain and leucine zipper containing 1 [Source:MGI Symbol;Acc:MGI:1920243]	92	158	12.7668	16.1639	0.34038
ENSMUST00000025250	ENSMUST00000025250	MGI:1919439	Bag6	BCL2-associated athanogene 6 [Source:MGI Symbol;Acc:MGI:1919439]	94	158	13.0444	16.1639	0.309354
ENSMUST00000175079	ENSMUST00000175079	MGI:5451962	Gm22185	predicted gene, 22185 [Source:MGI Symbol;Acc:MGI:5451962]	100	158	13.877	16.1639	0.220086
ENSMUST00000164606	ENSMUST00000164606	MGI:103268	Dnajc1	DnaJ (Hsp40) homolog, subfamily C, member 1 [Source:MGI Symbol;Acc:MGI:103268]	102	158	14.1545	16.1639	0.191517
ENSMUST00000001780	ENSMUST00000001780	MGI:87986	Akt1	thymoma viral proto-oncogene 1 [Source:MGI Symbol;Acc:MGI:87986]	108	158	14.9871	16.1639	0.109055
ENSMUST00000075845	ENSMUST00000075845	MGI:1929494	Grlf1	glucocorticoid receptor DNA binding factor 1 [Source:MGI Symbol;Acc:MGI:1929494]	113	158	15.681	16.1639	0.0437634
ENSMUST00000089752	ENSMUST00000089752	MGI:1915022	Chd8	chromodomain helicase DNA binding protein 8 [Source:MGI Symbol;Acc:MGI:1915022]	128	158	17.7625	16.1639	-0.136058
ENSMUST00000143898	ENSMUST00000143898	MGI:3650033	Gm13652	predicted gene 13652 [Source:MGI Symbol;Acc:MGI:3650033]	136	158	18.8727	16.1639	-0.22352
ENSMUST00000126596	ENSMUST00000126596	MGI:2443688	A230059L01Rik	RIKEN cDNA A230059L01 gene [Source:MGI Symbol;Acc:MGI:2443688]	143	158	19.8441	16.1639	-0.295929
ENSMUST00000129576	ENSMUST00000129576	MGI:3651952	Gm12480	predicted gene 12480 [Source:MGI Symbol;Acc:MGI:3651952]	154	158	21.3705	16.1639	-0.402844
ENSMUST00000169314	ENSMUST00000169314	MGI:2442264	Idi1	isopentenyl-diphosphate delta isomerase [Source:MGI Symbol;Acc:MGI:2442264]	46	157	6.38341	16.0616	1.33122
ENSMUST00000081551	ENSMUST00000081551	MGI:1196624	Tcea1	transcription elongation factor A (SII) 1 [Source:MGI Symbol;Acc:MGI:1196624]	64	157	8.88126	16.0616	0.854782
ENSMUST00000037776	ENSMUST00000037776	MGI:98285	Srsf3	serine/arginine-rich splicing factor 3 [Source:MGI Symbol;Acc:MGI:98285]	70	157	9.71388	16.0616	0.725499
ENSMUST00000098853	ENSMUST00000098853	MGI:2385262	Suv420h2	suppressor of variegation 4-20 homolog 2 (Drosophila) [Source:MGI Symbol;Acc:MGI:2385262]	71	157	9.85265	16.0616	0.705035
ENSMUST00000159117	ENSMUST00000159117	MGI:4415006	Gm16586	predicted gene 16586 [Source:MGI Symbol;Acc:MGI:4415006]	73	157	10.1302	16.0616	0.664958
ENSMUST00000040873	ENSMUST00000040873	MGI:1933527	Srrt	serrate RNA effector molecule homolog (Arabidopsis) [Source:MGI Symbol;Acc:MGI:1933527]	77	157	10.6853	16.0616	0.587996
ENSMUST00000166897	ENSMUST00000166897	MGI:106295	Tomm70a	translocase of outer mitochondrial membrane 70 homolog A (yeast) [Source:MGI Symbol;Acc:MGI:106295]	83	157	11.5179	16.0616	0.479743
ENSMUST00000009256	ENSMUST00000009256	MGI:2136959	Bcl2l13	BCL2-like 13 (apoptosis facilitator) [Source:MGI Symbol;Acc:MGI:2136959]	85	157	11.7954	16.0616	0.445391
ENSMUST00000147255	ENSMUST00000147255	MGI:1924621	Sec24a	Sec24 related gene family, member A (S. cerevisiae) [Source:MGI Symbol;Acc:MGI:1924621]	87	157	12.073	16.0616	0.411839
ENSMUST00000126970	ENSMUST00000126970	MGI:1861729	Abcb9	ATP-binding cassette, sub-family B (MDR/TAP), member 9 [Source:MGI Symbol;Acc:MGI:1861729]	89	157	12.3505	16.0616	0.379049
ENSMUST00000103064	ENSMUST00000103064	MGI:1919045	Pitpnc1	phosphatidylinositol transfer protein, cytoplasmic 1 [Source:MGI Symbol;Acc:MGI:1919045]	92	157	12.7668	16.0616	0.33122
ENSMUST00000098914	ENSMUST00000098914	MGI:2446201	Dennd4b	DENN/MADD domain containing 4B [Source:MGI Symbol;Acc:MGI:2446201]	92	157	12.7668	16.0616	0.33122
ENSMUST00000126650	ENSMUST00000126650	MGI:1926249	Car5b	carbonic anhydrase 5b, mitochondrial [Source:MGI Symbol;Acc:MGI:1926249]	96	157	13.3219	16.0616	0.26982
ENSMUST00000072141	ENSMUST00000072141	MGI:1341788	Pdcd11	programmed cell death 11 [Source:MGI Symbol;Acc:MGI:1341788]	108	157	14.9871	16.0616	0.0998949
ENSMUST00000180465	ENSMUST00000180465		AC162936.1		117	157	16.2361	16.0616	-0.0155824
ENSMUST00000092971	ENSMUST00000092971	MGI:1344395	Chd3	chromodomain helicase DNA binding protein 3 [Source:MGI Symbol;Acc:MGI:1344395]	121	157	16.7911	16.0616	-0.0640809
ENSMUST00000113335	ENSMUST00000113335	MGI:1861099	Ubr2	ubiquitin protein ligase E3 component n-recognin 2 [Source:MGI Symbol;Acc:MGI:1861099]	123	157	17.0687	16.0616	-0.0877321
ENSMUST00000183157	ENSMUST00000183157	MGI:3036282	Zfp532	zinc finger protein 532 [Source:MGI Symbol;Acc:MGI:3036282]	124	157	17.2074	16.0616	-0.099414
ENSMUST00000059037	ENSMUST00000059037	MGI:4821183	Trim12c	tripartite motif-containing 12C [Source:MGI Symbol;Acc:MGI:4821183]	153	157	21.2318	16.0616	-0.402605
ENSMUST00000036044	ENSMUST00000036044	MGI:2446143	Zfc3h1	zinc finger, C3H1-type containing [Source:MGI Symbol;Acc:MGI:2446143]	158	157	21.9256	16.0616	-0.448998
ENSMUST00000144383	ENSMUST00000144383	MGI:1920951	Megf11	multiple EGF-like-domains 11 [Source:MGI Symbol;Acc:MGI:1920951]	158	157	21.9256	16.0616	-0.448998
ENSMUST00000102780	ENSMUST00000102780	MGI:87979	Ak4	adenylate kinase 4 [Source:MGI Symbol;Acc:MGI:87979]	33	156	4.5794	15.9593	1.80117
ENSMUST00000050063	ENSMUST00000050063	MGI:99435	Arf6	ADP-ribosylation factor 6 [Source:MGI Symbol;Acc:MGI:99435]	40	156	5.55079	15.9593	1.52364
ENSMUST00000028963	ENSMUST00000028963	MGI:1914481	Tbc1d20	TBC1 domain family, member 20 [Source:MGI Symbol;Acc:MGI:1914481]	51	156	7.07726	15.9593	1.17314
ENSMUST00000043990	ENSMUST00000043990	MGI:2142951	Edc3	enhancer of mRNA decapping 3 homolog (S. cerevisiae) [Source:MGI Symbol;Acc:MGI:2142951]	54	156	7.49356	15.9593	1.09068
ENSMUST00000091789	ENSMUST00000091789	MGI:96925	Mbp	myelin basic protein [Source:MGI Symbol;Acc:MGI:96925]	59	156	8.18741	15.9593	0.962921
ENSMUST00000142806	ENSMUST00000142806	MGI:2386865	Paip2b	poly(A) binding protein interacting protein 2B [Source:MGI Symbol;Acc:MGI:2386865]	73	156	10.1302	15.9593	0.655739
ENSMUST00000041987	ENSMUST00000041987	MGI:2177178	Dicer1	dicer 1, ribonuclease type III [Source:MGI Symbol;Acc:MGI:2177178]	74	156	10.269	15.9593	0.63611
ENSMUST00000020538	ENSMUST00000020538	MGI:2144013	Xpo1	exportin 1, CRM1 homolog (yeast) [Source:MGI Symbol;Acc:MGI:2144013]	76	156	10.5465	15.9593	0.597636
ENSMUST00000082321	ENSMUST00000082321	MGI:88489	Cr2	complement receptor 2 [Source:MGI Symbol;Acc:MGI:88489]	80	156	11.1016	15.9593	0.523636
ENSMUST00000026043	ENSMUST00000026043	MGI:103241	Slk	STE20-like kinase [Source:MGI Symbol;Acc:MGI:103241]	98	156	13.5994	15.9593	0.230854
ENSMUST00000096753	ENSMUST00000096753	MGI:1915943	Hnrnpul2	heterogeneous nuclear ribonucleoprotein U-like 2 [Source:MGI Symbol;Acc:MGI:1915943]	98	156	13.5994	15.9593	0.230854
ENSMUST00000154981	ENSMUST00000154981	MGI:1913587	Fam229b	family with sequence similarity 229, member B [Source:MGI Symbol;Acc:MGI:1913587]	104	156	14.4321	15.9593	0.145124
ENSMUST00000125019	ENSMUST00000125019	MGI:1339984	Pak2	p21 protein (Cdc42/Rac)-activated kinase 2 [Source:MGI Symbol;Acc:MGI:1339984]	113	156	15.681	15.9593	0.0253849
ENSMUST00000029419	ENSMUST00000029419	MGI:1920039	Veph1	ventricular zone expressed PH domain-containing 1 [Source:MGI Symbol;Acc:MGI:1920039]	120	156	16.6524	15.9593	-0.0613268
ENSMUST00000054098	ENSMUST00000054098	MGI:2444789	Slc35g1	solute carrier family 35, member G1 [Source:MGI Symbol;Acc:MGI:2444789]	58	155	8.04864	15.857	0.978305
ENSMUST00000119311	ENSMUST00000119311	MGI:1338011	Auh	AU RNA binding protein/enoyl-coenzyme A hydratase [Source:MGI Symbol;Acc:MGI:1338011]	59	155	8.18741	15.857	0.953643
ENSMUST00000021942	ENSMUST00000021942	MGI:1913744	Prelid1	PRELI domain containing 1 [Source:MGI Symbol;Acc:MGI:1913744]	63	155	8.74249	15.857	0.859006
ENSMUST00000007131	ENSMUST00000007131	MGI:103251	Acly	ATP citrate lyase [Source:MGI Symbol;Acc:MGI:103251]	65	155	9.02003	15.857	0.813918
ENSMUST00000065562	ENSMUST00000065562	MGI:1914546	Socs4	suppressor of cytokine signaling 4 [Source:MGI Symbol;Acc:MGI:1914546]	66	155	9.1588	15.857	0.791892
ENSMUST00000128856	ENSMUST00000128856	MGI:2151114	Dgcr8	DiGeorge syndrome critical region gene 8 [Source:MGI Symbol;Acc:MGI:2151114]	66	155	9.1588	15.857	0.791892
ENSMUST00000178920	ENSMUST00000178920	MGI:5433945	Gm21781	predicted gene, 21781 [Source:MGI Symbol;Acc:MGI:5433945]	78	155	10.824	15.857	0.550884
ENSMUST00000043881	ENSMUST00000043881	MGI:1917580	Bclaf1	BCL2-associated transcription factor 1 [Source:MGI Symbol;Acc:MGI:1917580]	80	155	11.1016	15.857	0.514358
ENSMUST00000125424	ENSMUST00000125424	MGI:1343297	Drg1	developmentally regulated GTP binding protein 1 [Source:MGI Symbol;Acc:MGI:1343297]	82	155	11.3791	15.857	0.478734
ENSMUST00000126982	ENSMUST00000126982	MGI:1916092	Tulp4	tubby like protein 4 [Source:MGI Symbol;Acc:MGI:1916092]	84	155	11.6567	15.857	0.443969
ENSMUST00000019220	ENSMUST00000019220	MGI:2142346	Strn4	striatin, calmodulin binding protein 4 [Source:MGI Symbol;Acc:MGI:2142346]	87	155	12.073	15.857	0.393343
ENSMUST00000040321	ENSMUST00000040321	MGI:1920421	Trmt10a	tRNA methyltransferase 10A [Source:MGI Symbol;Acc:MGI:1920421]	101	155	14.0157	15.857	0.178075
ENSMUST00000165532	ENSMUST00000165532	MGI:1914365	Rpl14	ribosomal protein L14 [Source:MGI Symbol;Acc:MGI:1914365]	106	155	14.7096	15.857	0.108366
ENSMUST00000164817	ENSMUST00000164817	MGI:1890404	Serhl	serine hydrolase-like [Source:MGI Symbol;Acc:MGI:1890404]	109	155	15.1259	15.857	0.0681017
ENSMUST00000141810	ENSMUST00000141810	MGI:3783215	Gm15774	predicted gene 15774 [Source:MGI Symbol;Acc:MGI:3783215]	113	155	15.681	15.857	0.0161071
ENSMUST00000106121	ENSMUST00000106121	MGI:1196294	Fubp1	far upstream element (FUSE) binding protein 1 [Source:MGI Symbol;Acc:MGI:1196294]	116	155	16.0973	15.857	-0.021695
ENSMUST00000109488	ENSMUST00000109488	MGI:2441845	Snhg11	small nucleolar RNA host gene 11 [Source:MGI Symbol;Acc:MGI:2441845]	157	155	21.7868	15.857	-0.458335
ENSMUST00000069107	ENSMUST00000069107	MGI:1346858	Mapk1	mitogen-activated protein kinase 1 [Source:MGI Symbol;Acc:MGI:1346858]	34	154	4.71817	15.7547	1.73949
ENSMUST00000037333	ENSMUST00000037333	MGI:88315	Ccnd3	cyclin D3 [Source:MGI Symbol;Acc:MGI:88315]	40	154	5.55079	15.7547	1.50502
ENSMUST00000181605	ENSMUST00000181605		AC122821.1		42	154	5.82833	15.7547	1.43463
ENSMUST00000029445	ENSMUST00000029445	MGI:97376	Nras	neuroblastoma ras oncogene [Source:MGI Symbol;Acc:MGI:97376]	65	154	9.02003	15.7547	0.80458
ENSMUST00000034441	ENSMUST00000034441	MGI:2384560	Aars	alanyl-tRNA synthetase [Source:MGI Symbol;Acc:MGI:2384560]	65	154	9.02003	15.7547	0.80458
ENSMUST00000103216	ENSMUST00000103216	MGI:1196227	Dffa	DNA fragmentation factor, alpha subunit [Source:MGI Symbol;Acc:MGI:1196227]	83	154	11.5179	15.7547	0.451909
ENSMUST00000045270	ENSMUST00000045270	MGI:1333833	Cbfa2t2	core-binding factor, runt domain, alpha subunit 2, translocated to, 2 (human) [Source:MGI Symbol;Acc:MGI:1333833]	91	154	12.628	15.7547	0.319154
ENSMUST00000141208	ENSMUST00000141208	MGI:2448530	Vps13d	vacuolar protein sorting 13 D (yeast) [Source:MGI Symbol;Acc:MGI:2448530]	94	154	13.0444	15.7547	0.272359
ENSMUST00000030356	ENSMUST00000030356	MGI:1340044	Lrp8	low density lipoprotein receptor-related protein 8, apolipoprotein e receptor [Source:MGI Symbol;Acc:MGI:1340044]	96	154	13.3219	15.7547	0.241986
ENSMUST00000149291	ENSMUST00000149291	MGI:2443672	Slc12a8	solute carrier family 12 (potassium/chloride transporters), member 8 [Source:MGI Symbol;Acc:MGI:2443672]	116	154	16.0973	15.7547	-0.0310328
ENSMUST00000037182	ENSMUST00000037182	MGI:2443554	Hook3	hook homolog 3 (Drosophila) [Source:MGI Symbol;Acc:MGI:2443554]	116	154	16.0973	15.7547	-0.0310328
ENSMUST00000174032	ENSMUST00000174032	MGI:5141869	Gm20404	predicted gene 20404 [Source:MGI Symbol;Acc:MGI:5141869]	116	154	16.0973	15.7547	-0.0310328
ENSMUST00000169555	ENSMUST00000169555	MGI:3781930	Gm3755	predicted gene 3755 [Source:MGI Symbol;Acc:MGI:3781930]	120	154	16.6524	15.7547	-0.0799424
ENSMUST00000132804	ENSMUST00000132804	MGI:1913780	Ubxn6	UBX domain protein 6 [Source:MGI Symbol;Acc:MGI:1913780]	124	154	17.2074	15.7547	-0.127248
ENSMUST00000162280	ENSMUST00000162280	MGI:3057108	Lhfpl4	lipoma HMGIC fusion partner-like protein 4 [Source:MGI Symbol;Acc:MGI:3057108]	303	154	42.0472	15.7547	-1.41623
ENSMUST00000165123	ENSMUST00000165123	MGI:1934950	Csnk1a1	casein kinase 1, alpha 1 [Source:MGI Symbol;Acc:MGI:1934950]	38	153	5.27325	15.6524	1.56962
ENSMUST00000021297	ENSMUST00000021297	MGI:1919592	Lsm12	LSM12 homolog (S. cerevisiae) [Source:MGI Symbol;Acc:MGI:1919592]	46	153	6.38341	15.6524	1.29399
ENSMUST00000018625	ENSMUST00000018625	MGI:1914134	Appbp2	amyloid beta precursor protein (cytoplasmic tail) binding protein 2 [Source:MGI Symbol;Acc:MGI:1914134]	57	153	7.90987	15.6524	0.984659
ENSMUST00000164989	ENSMUST00000164989	MGI:1928323	Nisch	nischarin [Source:MGI Symbol;Acc:MGI:1928323]	58	153	8.04864	15.6524	0.959568
ENSMUST00000049680	ENSMUST00000049680	MGI:1921747	Zfp710	zinc finger protein 710 [Source:MGI Symbol;Acc:MGI:1921747]	71	153	9.85265	15.6524	0.667802
ENSMUST00000163125	ENSMUST00000163125	MGI:2158394	Med16	mediator complex subunit 16 [Source:MGI Symbol;Acc:MGI:2158394]	71	153	9.85265	15.6524	0.667802
ENSMUST00000053407	ENSMUST00000053407	MGI:1914917	Alkbh8	alkB, alkylation repair homolog 8 (E. coli) [Source:MGI Symbol;Acc:MGI:1914917]	73	153	10.1302	15.6524	0.627725
ENSMUST00000147822	ENSMUST00000147822	MGI:1914197	Commd7	COMM domain containing 7 [Source:MGI Symbol;Acc:MGI:1914197]	75	153	10.4077	15.6524	0.588731
ENSMUST00000043624	ENSMUST00000043624	MGI:3029632	Med13	mediator complex subunit 13 [Source:MGI Symbol;Acc:MGI:3029632]	81	153	11.2403	15.6524	0.477699
ENSMUST00000069673	ENSMUST00000069673	MGI:1918667	Gpatch8	G patch domain containing 8 [Source:MGI Symbol;Acc:MGI:1918667]	87	153	12.073	15.6524	0.374606
ENSMUST00000140234	ENSMUST00000140234	MGI:107687	Mdfi	MyoD family inhibitor [Source:MGI Symbol;Acc:MGI:107687]	88	153	12.2117	15.6524	0.358118
ENSMUST00000025278	ENSMUST00000025278	MGI:2137224	Mrpl27	mitochondrial ribosomal protein L27 [Source:MGI Symbol;Acc:MGI:2137224]	90	153	12.4893	15.6524	0.325696
ENSMUST00000026459	ENSMUST00000026459	MGI:107801	Atp5b	ATP synthase, H+ transporting mitochondrial F1 complex, beta subunit [Source:MGI Symbol;Acc:MGI:107801]	94	153	13.0444	15.6524	0.262961
ENSMUST00000043493	ENSMUST00000043493	MGI:2385865	BC018507	cDNA sequence BC018507 [Source:MGI Symbol;Acc:MGI:2385865]	104	153	14.4321	15.6524	0.11711
ENSMUST00000023554	ENSMUST00000023554	MGI:2387188	Dirc2	disrupted in renal carcinoma 2 (human) [Source:MGI Symbol;Acc:MGI:2387188]	106	153	14.7096	15.6524	0.089629
ENSMUST00000032192	ENSMUST00000032192	MGI:96623	Itpr1	inositol 1,4,5-trisphosphate receptor 1 [Source:MGI Symbol;Acc:MGI:96623]	114	153	15.8197	15.6524	-0.0153406
ENSMUST00000177363	ENSMUST00000177363	MGI:5313075	Gm20628	predicted gene 20628 [Source:MGI Symbol;Acc:MGI:5313075]	135	153	18.7339	15.6524	-0.259266
ENSMUST00000103979	ENSMUST00000103979	MGI:5453896	Gm24119	predicted gene, 24119 [Source:MGI Symbol;Acc:MGI:5453896]	31	152	4.30186	15.5501	1.85389
ENSMUST00000167662	ENSMUST00000167662	MGI:1914708	Ergic1	endoplasmic reticulum-golgi intermediate compartment (ERGIC) 1 [Source:MGI Symbol;Acc:MGI:1914708]	42	152	5.82833	15.5501	1.41577
ENSMUST00000020986	ENSMUST00000020986	MGI:2443036	Dnajc27	DnaJ (Hsp40) homolog, subfamily C, member 27 [Source:MGI Symbol;Acc:MGI:2443036]	46	152	6.38341	15.5501	1.28453
ENSMUST00000015858	ENSMUST00000015858	MGI:1924143	Cers2	ceramide synthase 2 [Source:MGI Symbol;Acc:MGI:1924143]	61	152	8.46495	15.5501	0.877352
ENSMUST00000180852	ENSMUST00000180852		AC133578.1		74	152	10.269	15.5501	0.598636
ENSMUST00000164343	ENSMUST00000164343	MGI:1346881	Map3k12	mitogen-activated protein kinase kinase kinase 12 [Source:MGI Symbol;Acc:MGI:1346881]	79	152	10.9628	15.5501	0.504308
ENSMUST00000027487	ENSMUST00000027487	MGI:1914170	Rnpepl1	arginyl aminopeptidase (aminopeptidase B)-like 1 [Source:MGI Symbol;Acc:MGI:1914170]	87	152	12.073	15.5501	0.365146
ENSMUST00000145140	ENSMUST00000145140	MGI:1918135	Ints10	integrator complex subunit 10 [Source:MGI Symbol;Acc:MGI:1918135]	91	152	12.628	15.5501	0.300294
ENSMUST00000039810	ENSMUST00000039810	MGI:1920442	Xpot	exportin, tRNA (nuclear export receptor for tRNAs) [Source:MGI Symbol;Acc:MGI:1920442]	93	152	12.9056	15.5501	0.26893
ENSMUST00000019723	ENSMUST00000019723	MGI:2156020	D17Wsu104e	DNA segment, Chr 17, Wayne State University 104, expressed [Source:MGI Symbol;Acc:MGI:2156020]	97	152	13.4607	15.5501	0.208176
ENSMUST00000154581	ENSMUST00000154581	MGI:109369	Hp1bp3	heterochromatin protein 1, binding protein 3 [Source:MGI Symbol;Acc:MGI:109369]	97	152	13.4607	15.5501	0.208176
ENSMUST00000151786	ENSMUST00000151786	MGI:1914051	Prkrip1	Prkr interacting protein 1 (IL11 inducible) [Source:MGI Symbol;Acc:MGI:1914051]	101	152	14.0157	15.5501	0.149878
ENSMUST00000020496	ENSMUST00000020496	MGI:891999	Adarb1	adenosine deaminase, RNA-specific, B1 [Source:MGI Symbol;Acc:MGI:891999]	104	152	14.4321	15.5501	0.107649
ENSMUST00000086216	ENSMUST00000086216	MGI:1929722	Anapc5	anaphase-promoting complex subunit 5 [Source:MGI Symbol;Acc:MGI:1929722]	108	152	14.9871	15.5501	0.0532016
ENSMUST00000105107	ENSMUST00000105107	MGI:2448326	Hist1h3e	histone cluster 1, H3e [Source:MGI Symbol;Acc:MGI:2448326]	111	152	15.4034	15.5501	0.0136733
ENSMUST00000020102	ENSMUST00000020102	MGI:3039629	Slc17a8	solute carrier family 17 (sodium-dependent inorganic phosphate cotransporter), member 8 [Source:MGI Symbol;Acc:MGI:3039629]	113	152	15.681	15.5501	-0.0120898
ENSMUST00000181764	ENSMUST00000181764		AC112688.1		122	152	16.9299	15.5501	-0.122648
ENSMUST00000169242	ENSMUST00000169242	MGI:4937994	Gm17167	predicted gene 17167 [Source:MGI Symbol;Acc:MGI:4937994]	129	152	17.9013	15.5501	-0.203138
ENSMUST00000125381	ENSMUST00000125381	MGI:107684	Plxna2	plexin A2 [Source:MGI Symbol;Acc:MGI:107684]	135	152	18.7339	15.5501	-0.268726
ENSMUST00000113886	ENSMUST00000113886	MGI:3779386	Gm11131	predicted gene 11131 [Source:MGI Symbol;Acc:MGI:3779386]	137	152	19.0115	15.5501	-0.289943
ENSMUST00000121964	ENSMUST00000121964	MGI:1918495	Wdr66	WD repeat domain 66 [Source:MGI Symbol;Acc:MGI:1918495]	139	152	19.289	15.5501	-0.310852
ENSMUST00000040853	ENSMUST00000040853	MGI:1917378	Oxsr1	oxidative-stress responsive 1 [Source:MGI Symbol;Acc:MGI:1917378]	47	151	6.52218	15.4478	1.24398
ENSMUST00000097888	ENSMUST00000097888	MGI:2446630	Ago1	argonaute RISC catalytic subunit 1 [Source:MGI Symbol;Acc:MGI:2446630]	49	151	6.79972	15.4478	1.18386
ENSMUST00000155660	ENSMUST00000155660	MGI:3644574	Gm6483	predicted gene 6483 [Source:MGI Symbol;Acc:MGI:3644574]	55	151	7.63233	15.4478	1.01721
ENSMUST00000025827	ENSMUST00000025827	MGI:1336159	Minpp1	multiple inositol polyphosphate histidine phosphatase 1 [Source:MGI Symbol;Acc:MGI:1336159]	56	151	7.7711	15.4478	0.991211
ENSMUST00000162580	ENSMUST00000162580	MGI:1298392	Bscl2	Bernardinelli-Seip congenital lipodystrophy 2 homolog (human) [Source:MGI Symbol;Acc:MGI:1298392]	72	151	9.99142	15.4478	0.628641
ENSMUST00000075192	ENSMUST00000075192	MGI:97308	Nfe2	nuclear factor, erythroid derived 2 [Source:MGI Symbol;Acc:MGI:97308]	73	151	10.1302	15.4478	0.608742
ENSMUST00000024011	ENSMUST00000024011	MGI:1336175	Kcnk5	potassium channel, subfamily K, member 5 [Source:MGI Symbol;Acc:MGI:1336175]	76	151	10.5465	15.4478	0.550639
ENSMUST00000023762	ENSMUST00000023762	MGI:1919199	Cers5	ceramide synthase 5 [Source:MGI Symbol;Acc:MGI:1919199]	78	151	10.824	15.4478	0.513164
ENSMUST00000133756	ENSMUST00000133756	MGI:3040968	Clec12a	C-type lectin domain family 12, member a [Source:MGI Symbol;Acc:MGI:3040968]	83	151	11.5179	15.4478	0.423527
ENSMUST00000020576	ENSMUST00000020576	MGI:102890	Ccng1	cyclin G1 [Source:MGI Symbol;Acc:MGI:102890]	92	151	12.7668	15.4478	0.275004
ENSMUST00000045402	ENSMUST00000045402	MGI:1919305	Slc38a10	solute carrier family 38, member 10 [Source:MGI Symbol;Acc:MGI:1919305]	94	151	13.0444	15.4478	0.243977
ENSMUST00000047950	ENSMUST00000047950	MGI:1353423	Zfp292	zinc finger protein 292 [Source:MGI Symbol;Acc:MGI:1353423]	104	151	14.4321	15.4478	0.0981266
ENSMUST00000067549	ENSMUST00000067549	MGI:1917140	Zfp219	zinc finger protein 219 [Source:MGI Symbol;Acc:MGI:1917140]	105	151	14.5708	15.4478	0.0843208
ENSMUST00000026073	ENSMUST00000026073	MGI:1919383	Trub1	TruB pseudouridine (psi) synthase homolog 1 (E. coli) [Source:MGI Symbol;Acc:MGI:1919383]	112	151	15.5422	15.4478	-0.00878857
ENSMUST00000092382	ENSMUST00000092382	MGI:1919594	Usp36	ubiquitin specific peptidase 36 [Source:MGI Symbol;Acc:MGI:1919594]	114	151	15.8197	15.4478	-0.0343237
ENSMUST00000181710	ENSMUST00000181710		AC153382.1		130	151	18.0401	15.4478	-0.223801
ENSMUST00000040750	ENSMUST00000040750	MGI:96787	Lif	leukemia inhibitory factor [Source:MGI Symbol;Acc:MGI:96787]	163	151	22.6195	15.4478	-0.550162
ENSMUST00000089874	ENSMUST00000089874	MGI:96930	Mcc	mutated in colorectal cancers [Source:MGI Symbol;Acc:MGI:96930]	168	151	23.3133	15.4478	-0.593751
ENSMUST00000002176	ENSMUST00000002176	MGI:1338822	Celf2	CUGBP, Elav-like family member 2 [Source:MGI Symbol;Acc:MGI:1338822]	34	150	4.71817	15.3455	1.70152
ENSMUST00000072239	ENSMUST00000072239	MGI:106920	Tmpo	thymopoietin [Source:MGI Symbol;Acc:MGI:106920]	44	150	6.10587	15.3455	1.32955
ENSMUST00000035009	ENSMUST00000035009	MGI:2447166	Cmtm7	CKLF-like MARVEL transmembrane domain containing 7 [Source:MGI Symbol;Acc:MGI:2447166]	51	150	7.07726	15.3455	1.11655
ENSMUST00000042220	ENSMUST00000042220	MGI:1298222	Naip6	NLR family, apoptosis inhibitory protein 6 [Source:MGI Symbol;Acc:MGI:1298222]	59	150	8.18741	15.3455	0.906337
ENSMUST00000152668	ENSMUST00000152668	MGI:1917711	Crtc3	CREB regulated transcription coactivator 3 [Source:MGI Symbol;Acc:MGI:1917711]	60	150	8.32618	15.3455	0.88209
ENSMUST00000089645	ENSMUST00000089645	MGI:1928676	Htra2	HtrA serine peptidase 2 [Source:MGI Symbol;Acc:MGI:1928676]	61	150	8.46495	15.3455	0.858243
ENSMUST00000034591	ENSMUST00000034591	MGI:1346542	Bace1	beta-site APP cleaving enzyme 1 [Source:MGI Symbol;Acc:MGI:1346542]	66	150	9.1588	15.3455	0.744586
ENSMUST00000147884	ENSMUST00000147884	MGI:1923620	Txndc11	thioredoxin domain containing 11 [Source:MGI Symbol;Acc:MGI:1923620]	77	150	10.6853	15.3455	0.522194
ENSMUST00000147183	ENSMUST00000147183	MGI:1194912	Rbbp4	retinoblastoma binding protein 4 [Source:MGI Symbol;Acc:MGI:1194912]	81	150	11.2403	15.3455	0.44913
ENSMUST00000046689	ENSMUST00000046689	MGI:1914496	2810474O19Rik	RIKEN cDNA 2810474O19 gene [Source:MGI Symbol;Acc:MGI:1914496]	81	150	11.2403	15.3455	0.44913
ENSMUST00000182164	ENSMUST00000182164	MGI:1276108	Birc6	baculoviral IAP repeat-containing 6 [Source:MGI Symbol;Acc:MGI:1276108]	82	150	11.3791	15.3455	0.431428
ENSMUST00000162933	ENSMUST00000162933	MGI:99473	Arrb1	arrestin, beta 1 [Source:MGI Symbol;Acc:MGI:99473]	83	150	11.5179	15.3455	0.413941
ENSMUST00000112751	ENSMUST00000112751	MGI:88138	Bcl2	B cell leukemia/lymphoma 2 [Source:MGI Symbol;Acc:MGI:88138]	89	150	12.3505	15.3455	0.313247
ENSMUST00000041023	ENSMUST00000041023	MGI:1918944	Ipo9	importin 9 [Source:MGI Symbol;Acc:MGI:1918944]	89	150	12.3505	15.3455	0.313247
ENSMUST00000032485	ENSMUST00000032485	MGI:1913743	Mrpl51	mitochondrial ribosomal protein L51 [Source:MGI Symbol;Acc:MGI:1913743]	90	150	12.4893	15.3455	0.297127
ENSMUST00000131842	ENSMUST00000131842	MGI:109585	Pld1	phospholipase D1 [Source:MGI Symbol;Acc:MGI:109585]	92	150	12.7668	15.3455	0.265418
ENSMUST00000164617	ENSMUST00000164617	MGI:1928323	Nisch	nischarin [Source:MGI Symbol;Acc:MGI:1928323]	93	150	12.9056	15.3455	0.249821
ENSMUST00000061721	ENSMUST00000061721	MGI:1096341	E2f2	E2F transcription factor 2 [Source:MGI Symbol;Acc:MGI:1096341]	40	149	5.55079	15.2432	1.4574
ENSMUST00000137012	ENSMUST00000137012	MGI:1352467	Esr1	estrogen receptor 1 (alpha) [Source:MGI Symbol;Acc:MGI:1352467]	42	149	5.82833	15.2432	1.38701
ENSMUST00000108345	ENSMUST00000108345	MGI:1918850	Ythdf3	YTH domain family 3 [Source:MGI Symbol;Acc:MGI:1918850]	44	149	6.10587	15.2432	1.3199
ENSMUST00000072836	ENSMUST00000072836	MGI:1861380	Sphk2	sphingosine kinase 2 [Source:MGI Symbol;Acc:MGI:1861380]	47	149	6.52218	15.2432	1.22474
ENSMUST00000137060	ENSMUST00000137060	MGI:3041210	Ccdc157	coiled-coil domain containing 157 [Source:MGI Symbol;Acc:MGI:3041210]	55	149	7.63233	15.2432	0.99797
ENSMUST00000062147	ENSMUST00000062147	MGI:87906	Actg1	actin, gamma, cytoplasmic 1 [Source:MGI Symbol;Acc:MGI:87906]	55	149	7.63233	15.2432	0.99797
ENSMUST00000136455	ENSMUST00000136455	MGI:1914049	Ube2w	ubiquitin-conjugating enzyme E2W (putative) [Source:MGI Symbol;Acc:MGI:1914049]	58	149	8.04864	15.2432	0.921349
ENSMUST00000034960	ENSMUST00000034960	MGI:1921638	Dpp8	dipeptidylpeptidase 8 [Source:MGI Symbol;Acc:MGI:1921638]	63	149	8.74249	15.2432	0.80205
ENSMUST00000062122	ENSMUST00000062122	MGI:1923719	Cmya5	cardiomyopathy associated 5 [Source:MGI Symbol;Acc:MGI:1923719]	69	149	9.57511	15.2432	0.670806
ENSMUST00000073781	ENSMUST00000073781	MGI:1289147	E2f7	E2F transcription factor 7 [Source:MGI Symbol;Acc:MGI:1289147]	71	149	9.85265	15.2432	0.629583
ENSMUST00000042942	ENSMUST00000042942	MGI:2450915	Sec23ip	Sec23 interacting protein [Source:MGI Symbol;Acc:MGI:2450915]	75	149	10.4077	15.2432	0.550511
ENSMUST00000113711	ENSMUST00000113711	MGI:1919070	Wdr34	WD repeat domain 34 [Source:MGI Symbol;Acc:MGI:1919070]	76	149	10.5465	15.2432	0.531403
ENSMUST00000168704	ENSMUST00000168704	MGI:95757	Slc2a3	solute carrier family 2 (facilitated glucose transporter), member 3 [Source:MGI Symbol;Acc:MGI:95757]	76	149	10.5465	15.2432	0.531403
ENSMUST00000056449	ENSMUST00000056449	MGI:2684948	Arhgap30	Rho GTPase activating protein 30 [Source:MGI Symbol;Acc:MGI:2684948]	76	149	10.5465	15.2432	0.531403
ENSMUST00000034854	ENSMUST00000034854	MGI:87892	Chrnb4	cholinergic receptor, nicotinic, beta polypeptide 4 [Source:MGI Symbol;Acc:MGI:87892]	76	149	10.5465	15.2432	0.531403
ENSMUST00000109554	ENSMUST00000109554	MGI:1328310	Zc3h7b	zinc finger CCCH type containing 7B [Source:MGI Symbol;Acc:MGI:1328310]	77	149	10.6853	15.2432	0.512544
ENSMUST00000129854	ENSMUST00000129854	MGI:1349457	Serinc3	serine incorporator 3 [Source:MGI Symbol;Acc:MGI:1349457]	77	149	10.6853	15.2432	0.512544
ENSMUST00000027916	ENSMUST00000027916	MGI:1338800	Bpnt1	bisphosphate 3'-nucleotidase 1 [Source:MGI Symbol;Acc:MGI:1338800]	82	149	11.3791	15.2432	0.421778
ENSMUST00000072031	ENSMUST00000072031	MGI:1349438	Mprip	myosin phosphatase Rho interacting protein [Source:MGI Symbol;Acc:MGI:1349438]	85	149	11.7954	15.2432	0.369939
ENSMUST00000092618	ENSMUST00000092618	MGI:107789	Aup1	ancient ubiquitous protein 1 [Source:MGI Symbol;Acc:MGI:107789]	85	149	11.7954	15.2432	0.369939
ENSMUST00000013886	ENSMUST00000013886	MGI:1924258	Ppp1r12c	protein phosphatase 1, regulatory (inhibitor) subunit 12C [Source:MGI Symbol;Acc:MGI:1924258]	87	149	12.073	15.2432	0.336387
ENSMUST00000069168	ENSMUST00000069168	MGI:1913948	Cpsf6	cleavage and polyadenylation specific factor 6 [Source:MGI Symbol;Acc:MGI:1913948]	92	149	12.7668	15.2432	0.255768
ENSMUST00000146751	ENSMUST00000146751	MGI:3705162	Gm14963	predicted gene 14963 [Source:MGI Symbol;Acc:MGI:3705162]	119	149	16.5136	15.2432	-0.115488
ENSMUST00000173151	ENSMUST00000173151	MGI:107547	Zfp101	zinc finger protein 101 [Source:MGI Symbol;Acc:MGI:107547]	124	149	17.2074	15.2432	-0.174866
ENSMUST00000066330	ENSMUST00000066330	MGI:1349438	Mprip	myosin phosphatase Rho interacting protein [Source:MGI Symbol;Acc:MGI:1349438]	126	149	17.485	15.2432	-0.19795
ENSMUST00000022369	ENSMUST00000022369	MGI:98927	Vcl	vinculin [Source:MGI Symbol;Acc:MGI:98927]	41	148	5.68956	15.1409	1.41206
ENSMUST00000025846	ENSMUST00000025846	MGI:1921807	Ppp6r3	protein phosphatase 6, regulatory subunit 3 [Source:MGI Symbol;Acc:MGI:1921807]	61	148	8.46495	15.1409	0.838878
ENSMUST00000020284	ENSMUST00000020284	MGI:1919017	Tysnd1	trypsin domain containing 1 [Source:MGI Symbol;Acc:MGI:1919017]	63	148	8.74249	15.1409	0.792335
ENSMUST00000175248	ENSMUST00000175248	MGI:5455353	Gm25576	predicted gene, 25576 [Source:MGI Symbol;Acc:MGI:5455353]	79	148	10.9628	15.1409	0.465834
ENSMUST00000029571	ENSMUST00000029571	MGI:1920026	Sass6	spindle assembly 6 homolog (C. elegans) [Source:MGI Symbol;Acc:MGI:1920026]	81	148	11.2403	15.1409	0.429765
ENSMUST00000070705	ENSMUST00000070705	MGI:1342291	Rlim	ring finger protein, LIM domain interacting [Source:MGI Symbol;Acc:MGI:1342291]	86	148	11.9342	15.1409	0.34335
ENSMUST00000048155	ENSMUST00000048155	MGI:1914289	Rbm25	RNA binding motif protein 25 [Source:MGI Symbol;Acc:MGI:1914289]	87	148	12.073	15.1409	0.326671
ENSMUST00000032934	ENSMUST00000032934	MGI:87994	Aldoa	aldolase A, fructose-bisphosphate [Source:MGI Symbol;Acc:MGI:87994]	93	148	12.9056	15.1409	0.230456
ENSMUST00000106440	ENSMUST00000106440	MGI:2442815	Trim65	tripartite motif-containing 65 [Source:MGI Symbol;Acc:MGI:2442815]	102	148	14.1545	15.1409	0.0971896
ENSMUST00000009157	ENSMUST00000009157	MGI:1861457	Dynll1	dynein light chain LC8-type 1 [Source:MGI Symbol;Acc:MGI:1861457]	105	148	14.5708	15.1409	0.0553695
ENSMUST00000059249	ENSMUST00000059249	MGI:3650907	Rps6-ps4	ribosomal protein S6, pseudogene 4 [Source:MGI Symbol;Acc:MGI:3650907]	114	148	15.8197	15.1409	-0.063275
ENSMUST00000159426	ENSMUST00000159426	MGI:1347048	Clcn7	chloride channel 7 [Source:MGI Symbol;Acc:MGI:1347048]	159	148	22.0644	15.1409	-0.543268
ENSMUST00000031591	ENSMUST00000031591	MGI:107792	Lhx5	LIM homeobox protein 5 [Source:MGI Symbol;Acc:MGI:107792]	167	148	23.1745	15.1409	-0.614089
ENSMUST00000139848	ENSMUST00000139848	MGI:1922391	Rasd2	RASD family, member 2 [Source:MGI Symbol;Acc:MGI:1922391]	201	148	27.8927	15.1409	-0.881437
ENSMUST00000181374	ENSMUST00000181374		AC112688.1		354	148	49.1245	15.1409	-1.69799
ENSMUST00000160360	ENSMUST00000160360	MGI:1314872	Hipk2	homeodomain interacting protein kinase 2 [Source:MGI Symbol;Acc:MGI:1314872]	33	147	4.5794	15.0386	1.71544
ENSMUST00000099202	ENSMUST00000099202	MGI:1918885	Mast4	microtubule associated serine/threonine kinase family member 4 [Source:MGI Symbol;Acc:MGI:1918885]	46	147	6.38341	15.0386	1.23627
ENSMUST00000087215	ENSMUST00000087215	MGI:1928902	Rqcd1	rcd1 (required for cell differentiation) homolog 1 (S. pombe) [Source:MGI Symbol;Acc:MGI:1928902]	48	147	6.66095	15.0386	1.17487
ENSMUST00000087195	ENSMUST00000087195	MGI:1916377	Ociad2	OCIA domain containing 2 [Source:MGI Symbol;Acc:MGI:1916377]	50	147	6.93849	15.0386	1.11598
ENSMUST00000003079	ENSMUST00000003079	MGI:97760	Prkar2b	protein kinase, cAMP dependent regulatory, type II beta [Source:MGI Symbol;Acc:MGI:97760]	64	147	8.88126	15.0386	0.759834
ENSMUST00000069817	ENSMUST00000069817	MGI:1923304	Prrc2b	proline-rich coiled-coil 2B [Source:MGI Symbol;Acc:MGI:1923304]	66	147	9.1588	15.0386	0.71544
ENSMUST00000046743	ENSMUST00000046743	MGI:2448516	BC026585	cDNA sequence BC026585 [Source:MGI Symbol;Acc:MGI:2448516]	70	147	9.71388	15.0386	0.630551
ENSMUST00000143203	ENSMUST00000143203	MGI:1342296	Stxbp4	syntaxin binding protein 4 [Source:MGI Symbol;Acc:MGI:1342296]	75	147	10.4077	15.0386	0.531015
ENSMUST00000152520	ENSMUST00000152520	MGI:2136890	Setd4	SET domain containing 4 [Source:MGI Symbol;Acc:MGI:2136890]	77	147	10.6853	15.0386	0.493047
ENSMUST00000022450	ENSMUST00000022450	MGI:1921694	D14Abb1e	DNA segment, Chr 14, Abbott 1 expressed [Source:MGI Symbol;Acc:MGI:1921694]	83	147	11.5179	15.0386	0.384795
ENSMUST00000173875	ENSMUST00000173875	MGI:1344414	Sra1	steroid receptor RNA activator 1 [Source:MGI Symbol;Acc:MGI:1344414]	84	147	11.6567	15.0386	0.367517
ENSMUST00000060766	ENSMUST00000060766	MGI:2388633	Cltc	clathrin, heavy polypeptide (Hc) [Source:MGI Symbol;Acc:MGI:2388633]	88	147	12.2117	15.0386	0.300402
ENSMUST00000023491	ENSMUST00000023491	MGI:1917394	Lrch3	leucine-rich repeats and calponin homology (CH) domain containing 3 [Source:MGI Symbol;Acc:MGI:1917394]	90	147	12.4893	15.0386	0.267981
ENSMUST00000073173	ENSMUST00000073173	MGI:1352630	Abcc9	ATP-binding cassette, sub-family C (CFTR/MRP), member 9 [Source:MGI Symbol;Acc:MGI:1352630]	91	147	12.628	15.0386	0.252039
ENSMUST00000093802	ENSMUST00000093802	MGI:1925343	4922501C03Rik	RIKEN cDNA 4922501C03 gene [Source:MGI Symbol;Acc:MGI:1925343]	92	147	12.7668	15.0386	0.236272
[truncated: 46,878 more rows]
