# Supplementary material for: Identification of Non-Coding RNAs Associated with Telomeres Using a Combination of enChIP and RNA Sequencing
Source: PLoS One. 2015 Apr 13;10(4):e0123387. doi: 10.1371/journal.pone.0123387 (PMC4395285; doi:10.1371/journal.pone.0123387)
Supplement: S3 Table — (XLSX) [file pone.0123387.s003.xlsx]

## Sheet: MergeLincRNA_03A06-Targeted_QC_
Table S3. lncRNAs enriched in telomeres
mm10				mm9				read count		RPM		Log2 ratio
Chr	Start	End	mm10	Chr	Start	End	mm9	Ctrl_a with 100bp padded read count	enChIP_a with 100 bp padded read count	Ctrl_a with 100bp padded	enChIP_a with 100 bp padded	(enChIP with 100bp padded RPM / Ctrl with 100bp padded RPM )
chr16	4871450	4874336	chr16:4871450-4874336	chr16	4871450	4874336	chr16:4871450-4874336	6	69	0.832618	7.05894	3.08372
chr2	156388063	156391149	chr2:156388063-156391149	chr2	156213799	156216885	chr2:156213799-156216885	20	151	2.77539	15.4478	2.47664
chr18	12955859	12960004	chr18:12955859-12960004	chr18	13114368	13118513	chr18:13114368-13118513	13	95	1.80401	9.71883	2.42958
chrX	93752257	93764231	chrX:93752257-93764231	chrX	90997596	91009570	chrX:90997596-91009570	20	132	2.77539	13.5041	2.28263
chrX	93755313	93760516	chrX:93755313-93760516	chrX	91000652	91005855	chrX:91000652-91005855	10	60	1.3877	6.13821	2.14512
chrX	12107379	12108178	chrX:12107379-12108178	chrX	11684505	11685304	chrX:11684505-11685304	22	132	3.05293	13.5041	2.14512
chrX	19156981	19167241	chrX:19156981-19167241	chrX	18734107	18744367	chrX:18734107-18744367	22	128	3.05293	13.0948	2.10073
chr6	31283513	31291062	chr6:31283513-31291062	chr6	31233513	31241062	chr6:31233513-31241062	12	66	1.66524	6.75203	2.01959
chr2	153499935	153526434	chr2:153499935-153526434	chr2	153325671	153352170	chr2:153325671-153352170	422	1578	58.5608	161.435	1.46294
chr6	83418268	83457286	chr6:83418268-83457286	chr6	83368262	83407280	chr6:83368262-83407280	370	1296	51.3448	132.585	1.36863
chr1	4899730	4899931	chr1:4899730-4899931	chr1	4889811	4890012	chr1:4889811-4890012	0	6	0	0.613821	NA
chr1	6209866	6210522	chr1:6209866-6210522	chr1	6199947	6200603	chr1:6199947-6200603	0	4	0	0.409214	NA
chr1	20679077	20682562	chr1:20679077-20682562	chr1	20669158	20672643	chr1:20669158-20672643	6	0	0.832618	0	NA
chr1	23255685	23256407	chr1:23255685-23256407	chr1	23262524	23263246	chr1:23262524-23263246	0	0	0	0	NA
chr1	23325764	23326358	chr1:23325764-23326358	chr1	23332603	23333197	chr1:23332603-23333197	0	0	0	0	NA
chr1	23327953	23328528	chr1:23327953-23328528	chr1	23334792	23335367	chr1:23334792-23335367	0	0	0	0	NA
chr1	23332409	23333058	chr1:23332409-23333058	chr1	23339248	23339897	chr1:23339248-23339897	0	0	0	0	NA
chr1	23333259	23333713	chr1:23333259-23333713	chr1	23340098	23340552	chr1:23340098-23340552	0	0	0	0	NA
chr1	23333905	23334305	chr1:23333905-23334305	chr1	23340744	23341144	chr1:23340744-23341144	0	0	0	0	NA
chr1	36029647	36031018	chr1:36029647-36031018	chr1	36086492	36087863	chr1:36086492-36087863	0	0	0	0	NA
chr1	36037987	36038314	chr1:36037987-36038314	chr1	36094832	36095159	chr1:36094832-36095159	0	0	0	0	NA
chr1	36038487	36038861	chr1:36038487-36038861	chr1	36095332	36095706	chr1:36095332-36095706	0	0	0	0	NA
chr1	36038946	36039348	chr1:36038946-36039348	chr1	36095791	36096193	chr1:36095791-36096193	0	0	0	0	NA
chr1	38829355	38836079	chr1:38829355-38836079	chr1	38886200	38892924	chr1:38886200-38892924	4	0	0.555079	0	NA
chr1	38835197	38836698	chr1:38835197-38836698	chr1	38892042	38893543	chr1:38892042-38893543	4	0	0.555079	0	NA
chr1	39682204	39683280	chr1:39682204-39683280	chr1	39739049	39740125	chr1:39739049-39740125	0	0	0	0	NA
chr1	40056717	40056932	chr1:40056717-40056932	chr1	40113562	40113777	chr1:40113562-40113777	2	0	0.277539	0	NA
chr1	40057068	40057720	chr1:40057068-40057720	chr1	40113913	40114565	chr1:40113913-40114565	2	0	0.277539	0	NA
chr1	42702084	42714492	chr1:42702084-42714492	chr1	42758929	42771337	chr1:42758929-42771337	0	0	0	0	NA
chr1	42702327	42714492	chr1:42702327-42714492	chr1	42759172	42771337	chr1:42759172-42771337	0	0	0	0	NA
chr1	42915453	42915871	chr1:42915453-42915871	chr1	42972298	42972716	chr1:42972298-42972716	2	0	0.277539	0	NA
chr1	44865784	44866379	chr1:44865784-44866379	chr1	44922629	44923224	chr1:44922629-44923224	0	0	0	0	NA
chr1	45010006	45038805	chr1:45010006-45038805	chr1	45066851	45095650	chr1:45066851-45095650	5	0	0.693849	0	NA
chr1	59447865	59449504	chr1:59447865-59449504	chr1	59504709	59506348	chr1:59504709-59506348	0	0	0	0	NA
chr1	63266848	63273120	chr1:63266848-63273120	chr1	63313422	63319694	chr1:63313422-63319694	0	0	0	0	NA
chr1	71672194	71673040	chr1:71672194-71673040	chr1	71718768	71719614	chr1:71718768-71719614	0	0	0	0	NA
chr1	71683443	71693817	chr1:71683443-71693817	chr1	71730017	71740391	chr1:71730017-71740391	2	0	0.277539	0	NA
chr1	71683566	71684146	chr1:71683566-71684146	chr1	71730140	71730720	chr1:71730140-71730720	2	0	0.277539	0	NA
chr1	71893168	71901317	chr1:71893168-71901317	chr1	71939742	71947891	chr1:71939742-71947891	0	0	0	0	NA
chr1	71937991	71938500	chr1:71937991-71938500	chr1	71984565	71985074	chr1:71984565-71985074	2	0	0.277539	0	NA
chr1	72245090	72245175	chr1:72245090-72245175	chr1	72291664	72291749	chr1:72291664-72291749	0	0	0	0	NA
chr1	72936889	72940541	chr1:72936889-72940541	chr1	72983463	72987115	chr1:72983463-72987115	0	0	0	0	NA
chr1	72957581	72960907	chr1:72957581-72960907	chr1	73004155	73007481	chr1:73004155-73007481	2	0	0.277539	0	NA
chr1	73391385	73405054	chr1:73391385-73405054	chr1	73437959	73451628	chr1:73437959-73451628	0	0	0	0	NA
chr1	74067798	74068693	chr1:74067798-74068693	chr1	74114372	74115267	chr1:74114372-74115267	0	0	0	0	NA
chr1	77823414	77823971	chr1:77823414-77823971	chr1	77819989	77820546	chr1:77819989-77820546	0	0	0	0	NA
chr1	81636026	81647600	chr1:81636026-81647600	chr1	81632601	81644175	chr1:81632601-81644175	1	0	0.13877	0	NA
chr1	84965369	84966162	chr1:84965369-84966162	chr1	84961944	84962737	chr1:84961944-84962737	0	0	0	0	NA
chr1	85040103	85041955	chr1:85040103-85041955	chr1	85036678	85038530	chr1:85036678-85038530	0	0	0	0	NA
chr1	85121176	85132625	chr1:85121176-85132625	chr1	85117751	85129200	chr1:85117751-85129200	2	0	0.277539	0	NA
chr1	85307920	85308815	chr1:85307920-85308815	chr1	85304495	85305390	chr1:85304495-85305390	2	0	0.277539	0	NA
chr1	85447104	85466325	chr1:85447104-85466325	chr1	87343679	87362900	chr1:87343679-87362900	27	0	3.74678	0	NA
chr1	85515485	85522810	chr1:85515485-85522810	chr1	87412060	87419385	chr1:87412060-87419385	1	0	0.13877	0	NA
chr1	86499592	86500085	chr1:86499592-86500085	chr1	88396167	88396660	chr1:88396167-88396660	0	0	0	0	NA
chr1	86501595	86501779	chr1:86501595-86501779	chr1	88398170	88398354	chr1:88398170-88398354	0	2	0	0.204607	NA
chr1	86501827	86502069	chr1:86501827-86502069	chr1	88398402	88398644	chr1:88398402-88398644	0	2	0	0.204607	NA
chr1	86627463	86644156	chr1:86627463-86644156	chr1	88524038	88540731	chr1:88524038-88540731	6	0	0.832618	0	NA
chr1	88611977	88612213	chr1:88611977-88612213	chr1	90508552	90508788	chr1:90508552-90508788	0	0	0	0	NA
chr1	89016113	89022210	chr1:89016113-89022210	chr1	90912688	90918785	chr1:90912688-90918785	2	0	0.277539	0	NA
chr1	90255276	90260122	chr1:90255276-90260122	chr1	92151851	92156697	chr1:92151851-92156697	0	0	0	0	NA
chr1	90280458	90283912	chr1:90280458-90283912	chr1	92177033	92180487	chr1:92177033-92180487	2	0	0.277539	0	NA
chr1	90652925	90653650	chr1:90652925-90653650	chr1	92549500	92550225	chr1:92549500-92550225	0	0	0	0	NA
chr1	91858916	91859366	chr1:91858916-91859366	chr1	93755493	93755943	chr1:93755493-93755943	2	0	0.277539	0	NA
chr1	92180620	92181283	chr1:92180620-92181283	chr1	94077197	94077860	chr1:94077197-94077860	0	4	0	0.409214	NA
chr1	92714863	92717202	chr1:92714863-92717202	chr1	94611440	94613779	chr1:94611440-94613779	0	0	0	0	NA
chr1	92759213	92760480	chr1:92759213-92760480	chr1	94655790	94657057	chr1:94655790-94657057	0	0	0	0	NA
chr1	96872395	96884344	chr1:96872395-96884344	chr1	98768972	98780921	chr1:98768972-98780921	2	0	0.277539	0	NA
chr1	98584481	98597894	chr1:98584481-98597894	chr1	100481058	100494471	chr1:100481058-100494471	0	4	0	0.409214	NA
chr1	119157846	119158565	chr1:119157846-119158565	chr1	121054423	121055142	chr1:121054423-121055142	0	0	0	0	NA
chr1	120086264	120086809	chr1:120086264-120086809	chr1	121982841	121983386	chr1:121982841-121983386	0	0	0	0	NA
chr1	120758443	120763565	chr1:120758443-120763565	chr1	122655020	122660142	chr1:122655020-122660142	0	0	0	0	NA
chr1	121084307	121120432	chr1:121084307-121120432	chr1	122980884	123017009	chr1:122980884-123017009	13	0	1.80401	0	NA
chr1	121119767	121120432	chr1:121119767-121120432	chr1	123016344	123017009	chr1:123016344-123017009	0	0	0	0	NA
chr1	131944719	131945068	chr1:131944719-131945068	chr1	133841296	133841645	chr1:133841296-133841645	0	4	0	0.409214	NA
chr1	132274716	132279485	chr1:132274716-132279485	chr1	134171293	134176062	chr1:134171293-134176062	0	2	0	0.204607	NA
chr1	132349280	132350030	chr1:132349280-132350030	chr1	134245857	134246607	chr1:134245857-134246607	0	0	0	0	NA
chr1	133886710	133887060	chr1:133886710-133887060	chr1	135783287	135783637	chr1:135783287-135783637	0	0	0	0	NA
chr1	133933517	133944260	chr1:133933517-133944260	chr1	135830094	135840837	chr1:135830094-135840837	2	0	0.277539	0	NA
chr1	134060040	134060908	chr1:134060040-134060908	chr1	135956617	135957485	chr1:135956617-135957485	2	0	0.277539	0	NA
chr1	134096405	134099159	chr1:134096405-134099159	chr1	135992982	135995736	chr1:135992982-135995736	0	2	0	0.204607	NA
chr1	135792979	135796383	chr1:135792979-135796383	chr1	137689556	137692960	chr1:137689556-137692960	2	0	0.277539	0	NA
chr1	136576938	136579477	chr1:136576938-136579477	chr1	138473515	138476054	chr1:138473515-138476054	2	0	0.277539	0	NA
chr1	136581253	136582003	chr1:136581253-136582003	chr1	138477830	138478580	chr1:138477830-138478580	0	0	0	0	NA
chr1	136603033	136605468	chr1:136603033-136605468	chr1	138499610	138502045	chr1:138499610-138502045	0	0	0	0	NA
chr1	136622098	136624650	chr1:136622098-136624650	chr1	138518675	138521227	chr1:138518675-138521227	0	0	0	0	NA
chr1	136623928	136624650	chr1:136623928-136624650	chr1	138520505	138521227	chr1:138520505-138521227	0	0	0	0	NA
chr1	136696204	136726142	chr1:136696204-136726142	chr1	138592781	138622719	chr1:138592781-138622719	18	0	2.49785	0	NA
chr1	150153983	150165666	chr1:150153983-150165666	chr1	152001113	152012796	chr1:152001113-152012796	0	0	0	0	NA
chr1	151853919	151854504	chr1:151853919-151854504	chr1	153701049	153701634	chr1:153701049-153701634	0	0	0	0	NA
chr1	153372533	153384782	chr1:153372533-153384782	chr1	155219663	155231912	chr1:155219663-155231912	5	0	0.693849	0	NA
chr1	159116495	159139319	chr1:159116495-159139319	chr1	161046626	161069450	chr1:161046626-161069450	0	2	0	0.204607	NA
chr1	159505107	159505547	chr1:159505107-159505547	chr1	161435238	161435678	chr1:161435238-161435678	0	0	0	0	NA
chr1	160062127	160062832	chr1:160062127-160062832	chr1	161992258	161992963	chr1:161992258-161992963	0	0	0	0	NA
chr1	161598070	161598267	chr1:161598070-161598267	chr1	163528201	163528398	chr1:163528201-163528398	0	7	0	0.716124	NA
chr1	161598662	161599181	chr1:161598662-161599181	chr1	163528793	163529312	chr1:163528793-163529312	0	0	0	0	NA
chr1	165051743	165052338	chr1:165051743-165052338	chr1	166981874	166982469	chr1:166981874-166982469	0	0	0	0	NA
chr1	165055350	165055893	chr1:165055350-165055893	chr1	166985481	166986024	chr1:166985481-166986024	0	0	0	0	NA
chr1	165285855	165286065	chr1:165285855-165286065	chr1	167215986	167216196	chr1:167215986-167216196	0	0	0	0	NA
chr1	165288106	165288287	chr1:165288106-165288287	chr1	167218237	167218418	chr1:167218237-167218418	0	0	0	0	NA
chr1	165289711	165290374	chr1:165289711-165290374	chr1	167219842	167220505	chr1:167219842-167220505	0	0	0	0	NA
chr1	165585183	165585991	chr1:165585183-165585991	chr1	167515314	167516122	chr1:167515314-167516122	0	1	0	0.102303	NA
chr1	167096066	167102533	chr1:167096066-167102533	chr1	169026197	169032664	chr1:169026197-169032664	2	0	0.277539	0	NA
chr1	169472699	169473158	chr1:169472699-169473158	chr1	171402830	171403289	chr1:171402830-171403289	0	0	0	0	NA
chr1	171423186	171437318	chr1:171423186-171437318	chr1	173353317	173367449	chr1:173353317-173367449	9	0	1.24893	0	NA
chr1	173730512	173741747	chr1:173730512-173741747	chr1	175660643	175671878	chr1:175660643-175671878	0	0	0	0	NA
chr1	173775095	173787119	chr1:173775095-173787119	chr1	175705226	175717250	chr1:175705226-175717250	2	0	0.277539	0	NA
chr1	177268119	177268429	chr1:177268119-177268429	chr1	179198250	179198560	chr1:179198250-179198560	0	2	0	0.204607	NA
chr1	180508778	180519727	chr1:180508778-180519727	chr1	182438909	182449858	chr1:182438909-182449858	12	0	1.66524	0	NA
chr1	180878524	180885528	chr1:180878524-180885528	chr1	182808655	182815659	chr1:182808655-182815659	6	0	0.832618	0	NA
chr1	181851574	181853189	chr1:181851574-181853189	chr1	183781705	183783320	chr1:183781705-183783320	2	0	0.277539	0	NA
chr1	181881137	181886178	chr1:181881137-181886178	chr1	183811268	183816309	chr1:183811268-183816309	2	0	0.277539	0	NA
chr1	182050178	182051010	chr1:182050178-182051010	chr1	183980309	183981141	chr1:183980309-183981141	0	0	0	0	NA
chr1	184736977	184739520	chr1:184736977-184739520	chr1	186560856	186563399	chr1:186560856-186563399	2	0	0.277539	0	NA
chr1	186708417	186709010	chr1:186708417-186709010	chr1	188532296	188532889	chr1:188532296-188532889	0	0	0	0	NA
chr1	190660903	190661135	chr1:190660903-190661135	chr1	192484782	192485014	chr1:192484782-192485014	0	0	0	0	NA
chr1	192833119	192835213	chr1:192833119-192835213	chr1	194659313	194661407	chr1:194659313-194661407	7	0	0.971388	0	NA
chr1	193501752	193510401	chr1:193501752-193510401	chr1	195327946	195336595	chr1:195327946-195336595	0	3	0	0.30691	NA
chr1	193506466	193509803	chr1:193506466-193509803	chr1	195332660	195335997	chr1:195332660-195335997	0	0	0	0	NA
chr1	194619111	194619624	chr1:194619111-194619624	chr1	196445305	196445818	chr1:196445305-196445818	0	0	0	0	NA
chr17	39823623	39855872	chr17:39823623-39855872	chr17	39960568	39992817	chr17:39960568-39992817	3382902	4860402	469444	497236	0.0829759
chr2	94223057	94223467	chr2:94223057-94223467	chr2	94063214	94063624	chr2:94063214-94063624	0	0	0	0	NA
chr2	94208811	94209273	chr2:94208811-94209273	chr2	94048968	94049430	chr2:94048968-94049430	0	0	0	0	NA
chr17	39846958	39848743	chr17:39846958-39848743	chr17	39983903	39985688	chr17:39983903-39985688	1772667	2047409	245993	209457	-0.231961
chr17	39845079	39846332	chr17:39845079-39846332	chr17	39982024	39983277	chr17:39982024-39983277	373687	1025607	51856.4	104923	1.01674
chr17	39842997	39844848	chr17:39842997-39844848	chr17	39979942	39981793	chr17:39979942-39981793	223925	732247	31074	74911.4	1.26948
chr17	39844029	39844931	chr17:39844029-39844931	chr17	39980974	39981876	chr17:39980974-39981876	174886	593766	24268.9	60744.3	1.32364
chr2	92742230	92759208	chr2:92742230-92759208	chr2	92582387	92599365	chr2:92582387-92599365	10	0	1.3877	0	NA
chr2	84587096	84588120	chr2:84587096-84588120	chr2	84427253	84428277	chr2:84427253-84428277	0	0	0	0	NA
chr2	84582712	84589720	chr2:84582712-84589720	chr2	84422869	84429877	chr2:84422869-84429877	2	0	0.277539	0	NA
chr19	5771426	5848475	chr19:5771426-5848475	chr19	5771426	5848475	chr19:5771426-5848475	4401	9334	610.726	954.9	0.644826
chr19	5795690	5802671	chr19:5795690-5802671	chr19	5795690	5802671	chr19:5795690-5802671	3900	8009	541.202	819.348	0.59831
chr2	83700657	83701116	chr2:83700657-83701116	chr2	83540814	83541273	chr2:83540814-83541273	0	0	0	0	NA
chr2	83677020	83679071	chr2:83677020-83679071	chr2	83517177	83519228	chr2:83517177-83519228	0	0	0	0	NA
chr2	80498484	80499823	chr2:80498484-80499823	chr2	80338641	80339980	chr2:80338641-80339980	0	0	0	0	NA
chr2	80483294	80483645	chr2:80483294-80483645	chr2	80323451	80323802	chr2:80323451-80323802	0	0	0	0	NA
chr2	79681472	79681714	chr2:79681472-79681714	chr2	79521629	79521871	chr2:79521629-79521871	0	0	0	0	NA
chr2	79677657	79678164	chr2:79677657-79678164	chr2	79517814	79518321	chr2:79517814-79518321	0	0	0	0	NA
chr15	62152835	62270945	chr15:62152835-62270945	chr15	61984390	62102500	chr15:61984390-62102500	2391	6302	331.798	644.716	0.958357
chr15	62039205	62107241	chr15:62039205-62107241	chr15	61870760	61938796	chr15:61870760-61938796	1769	5313	245.484	543.538	1.14675
chr2	77969544	77998018	chr2:77969544-77998018	chr2	77807601	77836075	chr2:77807601-77836075	8	0	1.11016	0	NA
chr2	77877446	77881373	chr2:77877446-77881373	chr2	77715503	77719430	chr2:77715503-77719430	0	0	0	0	NA
chr2	77840616	77842936	chr2:77840616-77842936	chr2	77678673	77680993	chr2:77678673-77680993	0	0	0	0	NA
chr2	77817237	77819639	chr2:77817237-77819639	chr2	77655294	77657696	chr2:77655294-77657696	2	0	0.277539	0	NA
chr2	77314751	77317035	chr2:77314751-77317035	chr2	77152808	77155092	chr2:77152808-77155092	2	0	0.277539	0	NA
chr15	62175471	62258636	chr15:62175471-62258636	chr15	62007026	62090191	chr15:62007026-62090191	1823	4815	252.977	492.591	0.961383
chr4	132348014	132353663	chr4:132348014-132353663	chr4	131903929	131909578	chr4:131903929-131909578	1624	4531	225.362	463.537	1.04044
chr2	75655659	75656170	chr2:75655659-75656170	chr2	75493716	75494227	chr2:75493716-75494227	0	1	0	0.102303	NA
chr2	75653954	75654407	chr2:75653954-75654407	chr2	75492011	75492464	chr2:75492011-75492464	0	0	0	0	NA
chr2	75651380	75652106	chr2:75651380-75652106	chr2	75489437	75490163	chr2:75489437-75490163	1	0	0.13877	0	NA
chr2	75645985	75646758	chr2:75645985-75646758	chr2	75484042	75484815	chr2:75484042-75484815	0	0	0	0	NA
chr4	132349825	132354899	chr4:132349825-132354899	chr4	131905740	131910814	chr4:131905740-131910814	1626	4527	225.64	463.128	1.03739
chr2	75609486	75609968	chr2:75609486-75609968	chr2	75447543	75448025	chr2:75447543-75448025	0	0	0	0	NA
chr2	75608989	75609187	chr2:75608989-75609187	chr2	75447046	75447244	chr2:75447046-75447244	0	0	0	0	NA
chr7	143213111	143296547	chr7:143213111-143296547	chr7	150399016	150482452	chr7:150399016-150482452	2342	3484	324.999	356.425	0.133165
chr8	121831811	121877260	chr8:121831811-121877260	chr8	124355711	124401160	chr8:124355711-124401160	1378	3268	191.225	334.328	0.805994
chr2	72987241	72988413	chr2:72987241-72988413	chr2	72825298	72826470	chr2:72825298-72826470	2	0	0.277539	0	NA
chr12	82170364	82256227	chr12:82170364-82256227	chr12	83271351	83357214	chr12:83271351-83357214	1095	2907	151.953	297.396	0.968762
chr2	71747507	71750200	chr2:71747507-71750200	chr2	71585564	71588257	chr2:71585564-71588257	0	0	0	0	NA
chr2	71738162	71765761	chr2:71738162-71765761	chr2	71576219	71603818	chr2:71576219-71603818	10	0	1.3877	0	NA
chr2	71737815	71745397	chr2:71737815-71745397	chr2	71575872	71583454	chr2:71575872-71583454	5	0	0.693849	0	NA
chr19	5798136	5800557	chr19:5798136-5800557	chr19	5798136	5800557	chr19:5798136-5800557	1214	2819	168.466	288.393	0.775577
chr2	67997947	67998404	chr2:67997947-67998404	chr2	67836004	67836461	chr2:67836004-67836461	0	0	0	0	NA
chr2	67996479	67996857	chr2:67996479-67996857	chr2	67834536	67834914	chr2:67834536-67834914	0	0	0	0	NA
chr2	67882543	67885481	chr2:67882543-67885481	chr2	67720600	67723538	chr2:67720600-67723538	0	0	0	0	NA
chr2	67574422	67574902	chr2:67574422-67574902	chr2	67412479	67412959	chr2:67412479-67412959	0	0	0	0	NA
chr2	67573647	67574236	chr2:67573647-67574236	chr2	67411704	67412293	chr2:67411704-67412293	2	0	0.277539	0	NA
chr2	67572769	67573350	chr2:67572769-67573350	chr2	67410826	67411407	chr2:67410826-67411407	0	0	0	0	NA
chr2	67569454	67569788	chr2:67569454-67569788	chr2	67407511	67407845	chr2:67407511-67407845	0	0	0	0	NA
chr1	72234960	72252827	chr1:72234960-72252827	chr1	72281534	72299401	chr1:72281534-72299401	1917	2761	266.022	282.46	0.0865022
chr19	5795691	5797464	chr19:5795691-5797464	chr19	5795691	5797464	chr19:5795691-5797464	1063	2637	147.512	269.774	0.870918
chr6	31067988	31224287	chr6:31067988-31224287	chr6	31017988	31174287	chr6:31017988-31174287	1129	2513	156.671	257.089	0.714527
chr15	85581835	85718709	chr15:85581835-85718709	chr15	85412265	85549139	chr15:85412265-85549139	1082	2297	150.149	234.991	0.646212
chr15	62214469	62250975	chr15:62214469-62250975	chr15	62046024	62082530	chr15:62046024-62082530	581	1886	80.6252	192.944	1.25888
chr1	72243882	72244184	chr1:72243882-72244184	chr1	72290456	72290758	chr1:72290456-72290758	1188	1759	164.858	179.952	0.126382
chr8	20363768	20424801	chr8:20363768-20424801	chr8	19959346	20020379	chr8:19959346-20020379	822	1718	114.069	175.757	0.623681
chr2	51061633	51061999	chr2:51061633-51061999	chr2	50917153	50917519	chr2:50917153-50917519	0	0	0	0	NA
chrX	12094042	12123116	chrX:12094042-12123116	chrX	11671168	11700242	chrX:11671168-11700242	525	1540	72.8541	157.547	1.1127
chr2	48971436	48972072	chr2:48971436-48972072	chr2	48826956	48827592	chr2:48826956-48827592	0	0	0	0	NA
chr12	51779706	51832457	chr12:51779706-51832457	chr12	52880693	52933444	chr12:52880693-52933444	760	1461	105.465	149.465	0.503046
chr17	6427653	6529802	chr17:6427653-6529802	chr17	6426801	6528950	chr17:6426801-6528950	736	1355	102.135	138.621	0.440677
chr2	45277039	45281198	chr2:45277039-45281198	chr2	45132559	45136718	chr2:45132559-45136718	2	0	0.277539	0	NA
chr2	38975381	38985705	chr2:38975381-38985705	chr2	38830901	38841225	chr2:38830901-38841225	16	0	2.22032	0	NA
chr2	3785875	3786443	chr2:3785875-3786443	chr2	3703147	3703715	chr2:3703147-3703715	0	1	0	0.102303	NA
chr1	135586015	135729027	chr1:135586015-135729027	chr1	137482592	137625604	chr1:137482592-137625604	567	1257	78.6824	128.595	0.708726
chr2	176999421	177398395	chr2:176999421-177398395	chr2	176784126	177183100	chr2:176784126-177183100	712	1205	98.804	123.276	0.319246
chr2	35974437	35975237	chr2:35974437-35975237	chr2	35829957	35830757	chr2:35829957-35830757	0	0	0	0	NA
chr19	5801803	5802597	chr19:5801803-5802597	chr19	5801803	5802597	chr19:5801803-5802597	932	1179	129.333	120.616	-0.100677
chr2	177732796	178083345	chr2:177732796-178083345	chr2	177467501	177818050	chr2:177467501-177818050	664	1129	92.1431	115.501	0.325952
chr7	75757363	75810362	chr7:75757363-75810362	chr7	82902249	82955248	chr7:82902249-82955248	507	1112	70.3562	113.761	0.693261
chr2	33645075	33646354	chr2:33645075-33646354	chr2	33500595	33501874	chr2:33500595-33501874	2	0	0.277539	0	NA
chr2	33641193	33645663	chr2:33641193-33645663	chr2	33496713	33501183	chr2:33496713-33501183	0	1	0	0.102303	NA
chr1	135606447	135729027	chr1:135606447-135729027	chr1	137503024	137625604	chr1:137503024-137625604	480	1024	66.6095	104.759	0.653271
chr15	85672032	85693621	chr15:85672032-85693621	chr15	85502462	85524051	chr15:85502462-85524051	457	997	63.4178	101.997	0.685561
chr2	31859427	31861452	chr2:31859427-31861452	chr2	31714947	31716972	chr2:31714947-31716972	0	0	0	0	NA
chr11	120217886	120268785	chr11:120217886-120268785	chr11	120079200	120130099	chr11:120079200-120130099	463	993	64.2504	101.587	0.660943
chr15	62087464	62104025	chr15:62087464-62104025	chr15	61919019	61935580	chr15:61919019-61935580	280	935	38.8555	95.6537	1.2997
chr2	28404486	28404667	chr2:28404486-28404667	chr2	28260006	28260187	chr2:28260006-28260187	0	0	0	0	NA
chr13	107758266	107888810	chr13:107758266-107888810	chr13	108548346	108679004	chr13:108548346-108679004	280	865	38.8555	88.4925	1.18743
chr2	28295696	28296091	chr2:28295696-28296091	chr2	28151216	28151611	chr2:28151216-28151611	0	0	0	0	NA
chr2	27773183	27773383	chr2:27773183-27773383	chr2	27628703	27628903	chr2:27628703-27628903	0	0	0	0	NA
chr4	147734136	147809796	chr4:147734136-147809796	chr4	147108245	147183905	chr4:147108245-147183905	337	865	46.7654	88.4925	0.920113
chr2	25926964	25927555	chr2:25926964-25927555	chr2	25782484	25783075	chr2:25782484-25783075	0	2	0	0.204607	NA
chr13	107787650	107889514	chr13:107787650-107889514	chr13	108577844	108679708	chr13:108577844-108679708	260	813	36.0801	83.1727	1.20491
chr4	147731167	147796916	chr4:147731167-147796916	chr4	147105276	147171025	chr4:147105276-147171025	306	799	42.4635	81.7404	0.944825
chr17	3198869	3394643	chr17:3198869-3394643	chr17	3198869	3394643	chr17:3198869-3394643	440	795	61.0587	81.3312	0.413613
chr6	31605211	31743051	chr6:31605211-31743051	chr6	31555211	31693051	chr6:31555211-31693051	337	793	46.7654	81.1266	0.794734
chr3	3030147	3033623	chr3:3030147-3033623	chr3	3030147	3033623	chr3:3030147-3033623	0	0	0	0	NA
chr3	4797558	4798821	chr3:4797558-4798821	chr3	4797558	4798821	chr3:4797558-4798821	0	0	0	0	NA
chr3	18621535	18622194	chr3:18621535-18622194	chr3	18521535	18522194	chr3:18521535-18522194	0	0	0	0	NA
chr3	19311660	19313735	chr3:19311660-19313735	chr3	19211660	19213735	chr3:19211660-19213735	0	0	0	0	NA
chr3	22285081	22297830	chr3:22285081-22297830	chr3	22184003	22196752	chr3:22184003-22196752	0	0	0	0	NA
chr3	27083833	27084430	chr3:27083833-27084430	chr3	26982755	26983352	chr3:26982755-26983352	0	2	0	0.204607	NA
chr3	27087344	27087845	chr3:27087344-27087845	chr3	26986266	26986767	chr3:26986266-26986767	0	1	0	0.102303	NA
chr3	27858843	27859000	chr3:27858843-27859000	chr3	27757765	27757922	chr3:27757765-27757922	0	0	0	0	NA
chr3	27861836	27862229	chr3:27861836-27862229	chr3	27760758	27761151	chr3:27760758-27761151	0	0	0	0	NA
chr3	27950002	27957403	chr3:27950002-27957403	chr3	27848924	27856325	chr3:27848924-27856325	2	0	0.277539	0	NA
chr3	30153228	30153471	chr3:30153228-30153471	chr3	30052150	30052393	chr3:30052150-30052393	0	0	0	0	NA
chr3	30160253	30161886	chr3:30160253-30161886	chr3	30059175	30060808	chr3:30059175-30060808	0	0	0	0	NA
chr3	30165406	30165758	chr3:30165406-30165758	chr3	30064328	30064680	chr3:30064328-30064680	0	0	0	0	NA
chr3	30178417	30181359	chr3:30178417-30181359	chr3	30077339	30080281	chr3:30077339-30080281	0	0	0	0	NA
chr3	30200838	30235037	chr3:30200838-30235037	chr3	30099760	30133959	chr3:30099760-30133959	4	0	0.555079	0	NA
chr3	30201815	30202358	chr3:30201815-30202358	chr3	30100737	30101280	chr3:30100737-30101280	0	0	0	0	NA
chr3	30209074	30209673	chr3:30209074-30209673	chr3	30107996	30108595	chr3:30107996-30108595	0	0	0	0	NA
chr3	34598526	34602248	chr3:34598526-34602248	chr3	34497448	34501170	chr3:34497448-34501170	0	0	0	0	NA
chr3	34744402	34783851	chr3:34744402-34783851	chr3	34643324	34682773	chr3:34643324-34682773	9	0	1.24893	0	NA
chr3	34894932	34901669	chr3:34894932-34901669	chr3	34793854	34800591	chr3:34793854-34800591	2	0	0.277539	0	NA
chr3	34957870	34970622	chr3:34957870-34970622	chr3	34856792	34869544	chr3:34856792-34869544	7	0	0.971388	0	NA
chr3	35337102	35342576	chr3:35337102-35342576	chr3	35236024	35241498	chr3:35236024-35241498	0	0	0	0	NA
chr3	36399929	36400462	chr3:36399929-36400462	chr3	36298851	36299384	chr3:36298851-36299384	2	0	0.277539	0	NA
chr3	36400535	36400929	chr3:36400535-36400929	chr3	36299457	36299851	chr3:36299457-36299851	0	0	0	0	NA
chr3	36421498	36421853	chr3:36421498-36421853	chr3	36320420	36320775	chr3:36320420-36320775	0	0	0	0	NA
chr3	37644607	37647952	chr3:37644607-37647952	chr3	37543529	37546874	chr3:37543529-37546874	0	0	0	0	NA
chr3	37649052	37649514	chr3:37649052-37649514	chr3	37547974	37548436	chr3:37547974-37548436	0	0	0	0	NA
chr3	37669567	37670042	chr3:37669567-37670042	chr3	37568489	37568964	chr3:37568489-37568964	0	0	0	0	NA
chr3	37708021	37711208	chr3:37708021-37711208	chr3	37606943	37610130	chr3:37606943-37610130	4	0	0.555079	0	NA
chr3	37713282	37713697	chr3:37713282-37713697	chr3	37612204	37612619	chr3:37612204-37612619	0	0	0	0	NA
chr3	37761037	37767023	chr3:37761037-37767023	chr3	37659959	37665945	chr3:37659959-37665945	0	0	0	0	NA
chr3	41125472	41125784	chr3:41125472-41125784	chr3	40929394	40929706	chr3:40929394-40929706	0	0	0	0	NA
chr3	41163048	41172663	chr3:41163048-41172663	chr3	40966970	40976585	chr3:40966970-40976585	4	0	0.555079	0	NA
chr3	41243679	41243886	chr3:41243679-41243886	chr3	41047601	41047808	chr3:41047601-41047808	0	0	0	0	NA
chr3	41354135	41369131	chr3:41354135-41369131	chr3	41158057	41173053	chr3:41158057-41173053	2	0	0.277539	0	NA
chr3	41521247	41528444	chr3:41521247-41528444	chr3	41325169	41332366	chr3:41325169-41332366	2	0	0.277539	0	NA
chr3	41523572	41524446	chr3:41523572-41524446	chr3	41327494	41328368	chr3:41327494-41328368	2	0	0.277539	0	NA
chr3	45278031	45288430	chr3:45278031-45288430	chr3	45081953	45092352	chr3:45081953-45092352	4	0	0.555079	0	NA
chr3	45359331	45375255	chr3:45359331-45375255	chr3	45163253	45179177	chr3:45163253-45179177	1	0	0.13877	0	NA
chr3	51130947	51135996	chr3:51130947-51135996	chr3	50934869	50939918	chr3:50934869-50939918	0	0	0	0	NA
chr3	51200674	51201080	chr3:51200674-51201080	chr3	51004596	51005002	chr3:51004596-51005002	0	0	0	0	NA
chr3	52186573	52187953	chr3:52186573-52187953	chr3	51990495	51991875	chr3:51990495-51991875	0	2	0	0.204607	NA
chr3	52402953	52403463	chr3:52402953-52403463	chr3	52206875	52207385	chr3:52206875-52207385	0	0	0	0	NA
chr3	55574921	55577273	chr3:55574921-55577273	chr3	55378843	55381195	chr3:55378843-55381195	2	0	0.277539	0	NA
chr3	57610829	57623903	chr3:57610829-57623903	chr3	57414751	57427825	chr3:57414751-57427825	0	0	0	0	NA
chr3	57612697	57625757	chr3:57612697-57625757	chr3	57416619	57429679	chr3:57416619-57429679	0	0	0	0	NA
chr3	58926497	58938571	chr3:58926497-58938571	chr3	58730419	58742493	chr3:58730419-58742493	2	0	0.277539	0	NA
chr3	63091630	63092522	chr3:63091630-63092522	chr3	62895552	62896444	chr3:62895552-62896444	0	0	0	0	NA
chr3	65656272	65656847	chr3:65656272-65656847	chr3	65460194	65460769	chr3:65460194-65460769	0	0	0	0	NA
chr3	65659229	65659565	chr3:65659229-65659565	chr3	65463151	65463487	chr3:65463151-65463487	0	0	0	0	NA
chr3	65925743	65927775	chr3:65925743-65927775	chr3	65729665	65731697	chr3:65729665-65731697	0	2	0	0.204607	NA
chr3	65936664	65937079	chr3:65936664-65937079	chr3	65740586	65741001	chr3:65740586-65741001	2	0	0.277539	0	NA
chr3	75647449	75655752	chr3:75647449-75655752	chr3	75451371	75459674	chr3:75451371-75459674	6	0	0.832618	0	NA
chr3	79271880	79272506	chr3:79271880-79272506	chr3	79075802	79076428	chr3:79075802-79076428	0	2	0	0.204607	NA
chr3	84806637	84807211	chr3:84806637-84807211	chr3	84610559	84611133	chr3:84610559-84611133	0	0	0	0	NA
chr3	85977236	85977805	chr3:85977236-85977805	chr3	85781158	85781727	chr3:85781158-85781727	0	0	0	0	NA
chr3	85979173	85979486	chr3:85979173-85979486	chr3	85783095	85783408	chr3:85783095-85783408	0	0	0	0	NA
chr3	85980515	85980702	chr3:85980515-85980702	chr3	85784437	85784624	chr3:85784437-85784624	0	2	0	0.204607	NA
chr3	87157693	87162455	chr3:87157693-87162455	chr3	86961615	86966377	chr3:86961615-86966377	2	0	0.277539	0	NA
chr3	87771970	87772421	chr3:87771970-87772421	chr3	87575892	87576343	chr3:87575892-87576343	6	0	0.832618	0	NA
chr3	87961005	87965844	chr3:87961005-87965844	chr3	87764927	87769766	chr3:87764927-87769766	2	0	0.277539	0	NA
chr3	88224280	88227517	chr3:88224280-88227517	chr3	88028202	88031439	chr3:88028202-88031439	4	0	0.555079	0	NA
chr3	90621349	90631898	chr3:90621349-90631898	chr3	90425271	90435820	chr3:90425271-90435820	4	0	0.555079	0	NA
chr3	90623108	90623752	chr3:90623108-90623752	chr3	90427030	90427674	chr3:90427030-90427674	0	0	0	0	NA
chr3	93346686	93347279	chr3:93346686-93347279	chr3	93150608	93151201	chr3:93150608-93151201	0	6	0	0.613821	NA
chr3	93348638	93349229	chr3:93348638-93349229	chr3	93152560	93153151	chr3:93152560-93153151	0	0	0	0	NA
chr3	93358748	93359192	chr3:93358748-93359192	chr3	93162670	93163114	chr3:93162670-93163114	0	4	0	0.409214	NA
chr3	93760904	93772803	chr3:93760904-93772803	chr3	93564826	93576725	chr3:93564826-93576725	5	0	0.693849	0	NA
chr3	93766577	93785012	chr3:93766577-93785012	chr3	93570499	93588934	chr3:93570499-93588934	12	0	1.66524	0	NA
chr3	93778329	93789028	chr3:93778329-93789028	chr3	93582251	93592950	chr3:93582251-93592950	10	0	1.3877	0	NA
chr3	95650457	95650678	chr3:95650457-95650678	chr3	95454379	95454600	chr3:95454379-95454600	0	0	0	0	NA
chr3	95656712	95657521	chr3:95656712-95657521	chr3	95460634	95461443	chr3:95460634-95461443	2	0	0.277539	0	NA
chr3	95692964	95693260	chr3:95692964-95693260	chr3	95496887	95497183	chr3:95496887-95497183	0	0	0	0	NA
chr3	95699048	95699476	chr3:95699048-95699476	chr3	95502971	95503399	chr3:95502971-95503399	0	0	0	0	NA
chr3	95950677	95950994	chr3:95950677-95950994	chr3	95754600	95754917	chr3:95754600-95754917	2	0	0.277539	0	NA
chr3	96330117	96330621	chr3:96330117-96330621	chr3	96134040	96134544	chr3:96134040-96134544	0	0	0	0	NA
chr3	96401150	96402014	chr3:96401150-96402014	chr3	96205073	96205937	chr3:96205073-96205937	0	0	0	0	NA
chr3	96402381	96402948	chr3:96402381-96402948	chr3	96206304	96206871	chr3:96206304-96206871	0	0	0	0	NA
chr3	100489397	100523920	chr3:100489397-100523920	chr3	100293320	100327843	chr3:100293320-100327843	16	0	2.22032	0	NA
chr3	118292867	118293454	chr3:118292867-118293454	chr3	117995785	117996372	chr3:117995785-117996372	0	0	0	0	NA
chr3	118418972	118419366	chr3:118418972-118419366	chr3	118121890	118122284	chr3:118121890-118122284	0	0	0	0	NA
chr3	121653858	121654429	chr3:121653858-121654429	chr3	121356776	121357347	chr3:121356776-121357347	2	0	0.277539	0	NA
chr3	121912919	121913191	chr3:121912919-121913191	chr3	121615837	121616109	chr3:121615837-121616109	0	0	0	0	NA
chr3	121924628	121936552	chr3:121924628-121936552	chr3	121627546	121639470	chr3:121627546-121639470	5	0	0.693849	0	NA
chr3	125853267	125853558	chr3:125853267-125853558	chr3	125556185	125556476	chr3:125556185-125556476	0	0	0	0	NA
chr3	125853660	125854184	chr3:125853660-125854184	chr3	125556578	125557102	chr3:125556578-125557102	0	0	0	0	NA
chr3	125858402	125859214	chr3:125858402-125859214	chr3	125561320	125562132	chr3:125561320-125562132	0	0	0	0	NA
chr3	125860810	125861348	chr3:125860810-125861348	chr3	125563728	125564266	chr3:125563728-125564266	0	0	0	0	NA
chr3	127266673	127269708	chr3:127266673-127269708	chr3	126969591	126972626	chr3:126969591-126972626	2	0	0.277539	0	NA
chr3	127286779	127409553	chr3:127286779-127409553	chr3	126989697	127112471	chr3:126989697-127112471	32	0	4.44063	0	NA
chr3	127334794	127408994	chr3:127334794-127408994	chr3	127037712	127111912	chr3:127037712-127111912	26	0	3.60801	0	NA
chr3	127468079	127498178	chr3:127468079-127498178	chr3	127170997	127201096	chr3:127170997-127201096	2	0	0.277539	0	NA
chr3	131466009	131500344	chr3:131466009-131500344	chr3	131128973	131163308	chr3:131128973-131163308	12	0	1.66524	0	NA
chr3	131490395	131491097	chr3:131490395-131491097	chr3	131153359	131154061	chr3:131153359-131154061	4	0	0.555079	0	NA
chr3	138071597	138077371	chr3:138071597-138077371	chr3	137734561	137740335	chr3:137734561-137740335	1	0	0.13877	0	NA
chr3	138079703	138081506	chr3:138079703-138081506	chr3	137742667	137744470	chr3:137742667-137744470	0	0	0	0	NA
chr3	145650312	145652093	chr3:145650312-145652093	chr3	145313276	145315057	chr3:145313276-145315057	0	0	0	0	NA
chr3	146351169	146351581	chr3:146351169-146351581	chr3	146014133	146014545	chr3:146014133-146014545	0	0	0	0	NA
chr3	146852370	146894105	chr3:146852370-146894105	chr3	146515334	146557069	chr3:146515334-146557069	6	0	0.832618	0	NA
chr3	146966462	146986161	chr3:146966462-146986161	chr3	146629426	146649125	chr3:146629426-146649125	0	0	0	0	NA
chr3	146982059	146984013	chr3:146982059-146984013	chr3	146645023	146646977	chr3:146645023-146646977	0	0	0	0	NA
chr3	149221687	149225745	chr3:149221687-149225745	chr3	148884651	148888709	chr3:148884651-148888709	0	0	0	0	NA
chr3	152083128	152090799	chr3:152083128-152090799	chr3	151746092	151753763	chr3:151746092-151753763	4	0	0.555079	0	NA
chr4	3082420	3082785	chr4:3082420-3082785	chr4	3009567	3009932	chr4:3009567-3009932	0	0	0	0	NA
chr4	3510328	3511081	chr4:3510328-3511081	chr4	3437475	3438228	chr4:3437475-3438228	2	0	0.277539	0	NA
chr4	3819799	3820456	chr4:3819799-3820456	chr4	3746946	3747603	chr4:3746946-3747603	0	4	0	0.409214	NA
chr4	8424479	8431638	chr4:8424479-8431638	chr4	8351626	8358785	chr4:8351626-8358785	0	2	0	0.204607	NA
chr4	8638983	8641367	chr4:8638983-8641367	chr4	8566130	8568514	chr4:8566130-8568514	2	0	0.277539	0	NA
chr4	8647663	8648077	chr4:8647663-8648077	chr4	8574810	8575224	chr4:8574810-8575224	0	3	0	0.30691	NA
chr4	8679504	8686884	chr4:8679504-8686884	chr4	8606651	8614031	chr4:8606651-8614031	0	0	0	0	NA
chr4	11999472	12009043	chr4:11999472-12009043	chr4	11926619	11936190	chr4:11926619-11936190	2	0	0.277539	0	NA
chr4	13482562	13483199	chr4:13482562-13483199	chr4	13409709	13410346	chr4:13409709-13410346	0	0	0	0	NA
chr4	15303492	15304040	chr4:15303492-15304040	chr4	15230639	15231187	chr4:15230639-15231187	0	0	0	0	NA
chr4	15306156	15306485	chr4:15306156-15306485	chr4	15233303	15233632	chr4:15233303-15233632	5	0	0.693849	0	NA
chr4	16217168	16217820	chr4:16217168-16217820	chr4	16144315	16144967	chr4:16144315-16144967	0	0	0	0	NA
chr4	32207145	32207966	chr4:32207145-32207966	chr4	32294120	32294941	chr4:32294120-32294941	0	1	0	0.102303	NA
chr4	33277800	33277923	chr4:33277800-33277923	chr4	33364775	33364898	chr4:33364775-33364898	0	0	0	0	NA
chr4	33280696	33281160	chr4:33280696-33281160	chr4	33367671	33368135	chr4:33367671-33368135	0	3	0	0.30691	NA
chr4	40911721	40912195	chr4:40911721-40912195	chr4	40858754	40859228	chr4:40858754-40859228	0	0	0	0	NA
chr4	44184314	44185125	chr4:44184314-44185125	chr4	44197186	44197997	chr4:44197186-44197997	0	0	0	0	NA
chr4	53205064	53217561	chr4:53205064-53217561	chr4	53217936	53230433	chr4:53217936-53230433	2	0	0.277539	0	NA
chr4	53302632	53303178	chr4:53302632-53303178	chr4	53315504	53316050	chr4:53315504-53316050	0	0	0	0	NA
chr4	55580804	55616353	chr4:55580804-55616353	chr4	55593676	55629225	chr4:55593676-55629225	12	0	1.66524	0	NA
chr4	55969023	55973715	chr4:55969023-55973715	chr4	55981895	55986587	chr4:55981895-55986587	0	0	0	0	NA
chr4	56000726	56007750	chr4:56000726-56007750	chr4	56013598	56020622	chr4:56013598-56020622	0	0	0	0	NA
chr4	56539930	56540532	chr4:56539930-56540532	chr4	56552802	56553404	chr4:56552802-56553404	0	0	0	0	NA
chr4	57359792	57364292	chr4:57359792-57364292	chr4	57372664	57377164	chr4:57372664-57377164	1	0	0.13877	0	NA
chr4	64075533	64083814	chr4:64075533-64083814	chr4	63736567	63744848	chr4:63736567-63744848	0	0	0	0	NA
chr4	64149313	64149924	chr4:64149313-64149924	chr4	63810347	63810958	chr4:63810347-63810958	0	0	0	0	NA
chr4	64254053	64276603	chr4:64254053-64276603	chr4	63915087	63937637	chr4:63915087-63937637	6	0	0.832618	0	NA
chr4	88917303	88917931	chr4:88917303-88917931	chr4	88563207	88563835	chr4:88563207-88563835	0	0	0	0	NA
chr4	88926105	88926247	chr4:88926105-88926247	chr4	88572009	88572151	chr4:88572009-88572151	0	0	0	0	NA
chr4	88936217	88936850	chr4:88936217-88936850	chr4	88582121	88582754	chr4:88582121-88582754	0	0	0	0	NA
chr4	97440142	97440746	chr4:97440142-97440746	chr4	97106833	97107437	chr4:97106833-97107437	0	2	0	0.204607	NA
chr4	97477624	97478064	chr4:97477624-97478064	chr4	97144315	97144755	chr4:97144315-97144755	0	0	0	0	NA
chr4	99569500	99573011	chr4:99569500-99573011	chr4	99236191	99239702	chr4:99236191-99239702	1	0	0.13877	0	NA
chr4	99662541	99671733	chr4:99662541-99671733	chr4	99329232	99338424	chr4:99329232-99338424	2	0	0.277539	0	NA
chr4	101403081	101407856	chr4:101403081-101407856	chr4	101075686	101080461	chr4:101075686-101080461	0	0	0	0	NA
chr4	105362846	105386645	chr4:105362846-105386645	chr4	105035451	105059250	chr4:105035451-105059250	16	0	2.22032	0	NA
chr4	114345970	114346597	chr4:114345970-114346597	chr4	114018575	114019202	chr4:114018575-114019202	0	0	0	0	NA
chr4	114959336	114960013	chr4:114959336-114960013	chr4	114631941	114632618	chr4:114631941-114632618	0	3	0	0.30691	NA
chr4	115904672	115904961	chr4:115904672-115904961	chr4	115577277	115577566	chr4:115577277-115577566	0	0	0	0	NA
chr4	115967145	115969182	chr4:115967145-115969182	chr4	115639750	115641787	chr4:115639750-115641787	2	0	0.277539	0	NA
chr4	119460748	119461917	chr4:119460748-119461917	chr4	119133353	119134522	chr4:119133353-119134522	0	0	0	0	NA
chr4	120139249	120160001	chr4:120139249-120160001	chr4	119811854	119832606	chr4:119811854-119832606	15	0	2.08155	0	NA
chr4	120146179	120146674	chr4:120146179-120146674	chr4	119818784	119819279	chr4:119818784-119819279	0	0	0	0	NA
chr4	120251278	120251639	chr4:120251278-120251639	chr4	119923883	119924244	chr4:119923883-119924244	1	0	0.13877	0	NA
chr4	120259717	120259908	chr4:120259717-120259908	chr4	119932322	119932513	chr4:119932322-119932513	2	0	0.277539	0	NA
chr4	120291350	120303894	chr4:120291350-120303894	chr4	119963955	119976499	chr4:119963955-119976499	9	0	1.24893	0	NA
chr4	120295021	120305720	chr4:120295021-120305720	chr4	119967626	119978325	chr4:119967626-119978325	6	0	0.832618	0	NA
chr4	123683760	123687538	chr4:123683760-123687538	chr4	123361003	123364781	chr4:123361003-123364781	0	0	0	0	NA
chr4	124524917	124525581	chr4:124524917-124525581	chr4	124202160	124202824	chr4:124202160-124202824	2	0	0.277539	0	NA
chr4	127343047	127343260	chr4:127343047-127343260	chr4	127020291	127020504	chr4:127020291-127020504	0	0	0	0	NA
chr4	128381947	128383888	chr4:128381947-128383888	chr4	128059191	128061132	chr4:128059191-128061132	3	0	0.416309	0	NA
chr4	128564019	128565497	chr4:128564019-128565497	chr4	128241263	128242741	chr4:128241263-128242741	0	0	0	0	NA
chr4	129802011	129803118	chr4:129802011-129803118	chr4	129479255	129480362	chr4:129479255-129480362	0	0	0	0	NA
chr4	130629475	130629840	chr4:130629475-130629840	chr4	130185390	130185755	chr4:130185390-130185755	0	0	0	0	NA
chr4	133085474	133089146	chr4:133085474-133089146	chr4	132641389	132645061	chr4:132641389-132645061	8	0	1.11016	0	NA
chr4	133657037	133658102	chr4:133657037-133658102	chr4	133212952	133214017	chr4:133212952-133214017	0	4	0	0.409214	NA
chr4	133820380	133821762	chr4:133820380-133821762	chr4	133376295	133377677	chr4:133376295-133377677	0	0	0	0	NA
chr4	135310323	135311109	chr4:135310323-135311109	chr4	134866238	134867024	chr4:134866238-134867024	0	1	0	0.102303	NA
chr4	135581045	135584018	chr4:135581045-135584018	chr4	135136960	135139933	chr4:135136960-135139933	1	0	0.13877	0	NA
chr4	136028265	136028710	chr4:136028265-136028710	chr4	135584180	135584625	chr4:135584180-135584625	0	2	0	0.204607	NA
chr4	137179391	137179608	chr4:137179391-137179608	chr4	136735306	136735523	chr4:136735306-136735523	0	0	0	0	NA
chr4	139714707	139715144	chr4:139714707-139715144	chr4	139270622	139271059	chr4:139270622-139271059	0	0	0	0	NA
chr4	141283705	141284080	chr4:141283705-141284080	chr4	140839620	140839995	chr4:140839620-140839995	0	0	0	0	NA
chr4	141285292	141285724	chr4:141285292-141285724	chr4	140841207	140841639	chr4:140841207-140841639	0	2	0	0.204607	NA
chr4	143347377	143347766	chr4:143347377-143347766	chr4	142937280	142937669	chr4:142937280-142937669	2	0	0.277539	0	NA
chr4	146181725	146187653	chr4:146181725-146187653	chr4	146149126	146155054	chr4:146149126-146155054	2	0	0.277539	0	NA
chr4	146603785	146604785	chr4:146603785-146604785	chr4	145593254	145594254	chr4:145593254-145594254	3	0	0.416309	0	NA
chr4	147515398	147516064	chr4:147515398-147516064	chr4	146889507	146890173	chr4:146889507-146890173	0	2	0	0.204607	NA
chr4	147516488	147517188	chr4:147516488-147517188	chr4	146890597	146891297	chr4:146890597-146891297	0	3	0	0.30691	NA
chr4	148745379	148747034	chr4:148745379-148747034	chr4	148119488	148121143	chr4:148119488-148121143	2	0	0.277539	0	NA
chr4	150071093	150071793	chr4:150071093-150071793	chr4	149445202	149445902	chr4:149445202-149445902	2	0	0.277539	0	NA
chr4	152923496	152923967	chr4:152923496-152923967	chr4	152297605	152298076	chr4:152297605-152298076	0	0	0	0	NA
chr4	156186188	156190533	chr4:156186188-156190533	chr4	155560297	155564642	chr4:155560297-155564642	2	0	0.277539	0	NA
chr5	4570526	4597875	chr5:4570526-4597875	chr5	4570526	4597875	chr5:4570526-4597875	0	2	0	0.204607	NA
chr5	13067926	13096000	chr5:13067926-13096000	chr5	13067926	13096000	chr5:13067926-13096000	4	0	0.555079	0	NA
chr5	14943276	14944205	chr5:14943276-14944205	chr5	14943276	14944205	chr5:14943276-14944205	1	0	0.13877	0	NA
chr5	14988716	14989311	chr5:14988716-14989311	chr5	14988716	14989311	chr5:14988716-14989311	2	0	0.277539	0	NA
chr5	15033569	15033987	chr5:15033569-15033987	chr5	15033569	15033987	chr5:15033569-15033987	0	0	0	0	NA
chr5	26007226	26011603	chr5:26007226-26011603	chr5	26333766	26338143	chr5:26333766-26338143	10	0	1.3877	0	NA
chr5	26047886	26067135	chr5:26047886-26067135	chr5	26374426	26393675	chr5:26374426-26393675	6	0	0.832618	0	NA
chr5	31581079	31581709	chr5:31581079-31581709	chr5	31883452	31884082	chr5:31883452-31884082	2	0	0.277539	0	NA
chr5	32090540	32092660	chr5:32090540-32092660	chr5	32392913	32395033	chr5:32392913-32395033	0	0	0	0	NA
chr5	33436625	33437464	chr5:33436625-33437464	chr5	33779274	33780113	chr5:33779274-33780113	0	0	0	0	NA
chr5	33445623	33446196	chr5:33445623-33446196	chr5	33788272	33788845	chr5:33788272-33788845	0	0	0	0	NA
chr5	35149882	35150310	chr5:35149882-35150310	chr5	35492531	35492959	chr5:35492531-35492959	0	0	0	0	NA
chr5	35632617	35639912	chr5:35632617-35639912	chr5	35975266	35982561	chr5:35975266-35982561	6	0	0.832618	0	NA
chr5	51795413	51795909	chr5:51795413-51795909	chr5	52186652	52187148	chr5:52186652-52187148	0	0	0	0	NA
chr5	52607550	52619011	chr5:52607550-52619011	chr5	52998789	53010250	chr5:52998789-53010250	2	0	0.277539	0	NA
chr5	53360656	53371774	chr5:53360656-53371774	chr5	53751895	53763013	chr5:53751895-53763013	2	0	0.277539	0	NA
chr5	53519261	53522729	chr5:53519261-53522729	chr5	53910500	53913968	chr5:53910500-53913968	2	0	0.277539	0	NA
chr5	53662090	53662631	chr5:53662090-53662631	chr5	54053329	54053870	chr5:54053329-54053870	2	0	0.277539	0	NA
chr5	53662644	53662935	chr5:53662644-53662935	chr5	54053883	54054174	chr5:54053883-54054174	0	0	0	0	NA
chr5	67463716	67477924	chr5:67463716-67477924	chr5	67854955	67869163	chr5:67854955-67869163	0	4	0	0.409214	NA
chr5	67473811	67477282	chr5:67473811-67477282	chr5	67865050	67868521	chr5:67865050-67868521	0	0	0	0	NA
chr5	73380563	73381423	chr5:73380563-73381423	chr5	73771802	73772662	chr5:73771802-73772662	2	0	0.277539	0	NA
chr5	73950149	73950817	chr5:73950149-73950817	chr5	74341388	74342056	chr5:74341388-74342056	0	4	0	0.409214	NA
chr5	74787724	74788154	chr5:74787724-74788154	chr5	75183749	75184179	chr5:75183749-75184179	0	0	0	0	NA
chr5	74790601	74790885	chr5:74790601-74790885	chr5	75186626	75186910	chr5:75186626-75186910	0	0	0	0	NA
chr5	79416803	79417335	chr5:79416803-79417335	chr5	79845828	79846360	chr5:79845828-79846360	0	0	0	0	NA
chr5	79431042	79431600	chr5:79431042-79431600	chr5	79860067	79860625	chr5:79860067-79860625	0	0	0	0	NA
chr5	91051508	91073211	chr5:91051508-91073211	chr5	91480534	91502237	chr5:91480534-91502237	5	0	0.693849	0	NA
chr5	91911400	91913403	chr5:91911400-91913403	chr5	92340426	92342429	chr5:92340426-92342429	2	0	0.277539	0	NA
chr5	104603943	104608229	chr5:104603943-104608229	chr5	105032962	105037248	chr5:105032962-105037248	0	0	0	0	NA
chr5	104643918	104644982	chr5:104643918-104644982	chr5	105072937	105074001	chr5:105072937-105074001	0	0	0	0	NA
chr5	105696105	105696803	chr5:105696105-105696803	chr5	106125124	106125822	chr5:106125124-106125822	0	8	0	0.818427	NA
chr5	107075853	107078811	chr5:107075853-107078811	chr5	107504872	107507830	chr5:107504872-107507830	4	0	0.555079	0	NA
chr5	108111137	108111643	chr5:108111137-108111643	chr5	108540156	108540662	chr5:108540156-108540662	2	0	0.277539	0	NA
chr5	108114559	108115139	chr5:108114559-108115139	chr5	108543578	108544158	chr5:108543578-108544158	2	0	0.277539	0	NA
chr5	108115170	108115994	chr5:108115170-108115994	chr5	108544189	108545013	chr5:108544189-108545013	0	4	0	0.409214	NA
chr5	108725368	108725887	chr5:108725368-108725887	chr5	109154387	109154906	chr5:109154387-109154906	0	0	0	0	NA
chr5	108727100	108727403	chr5:108727100-108727403	chr5	109156119	109156422	chr5:109156119-109156422	0	0	0	0	NA
chr5	110462624	110489623	chr5:110462624-110489623	chr5	110891643	110918642	chr5:110891643-110918642	8	0	1.11016	0	NA
chr5	110535836	110536203	chr5:110535836-110536203	chr5	110964855	110965222	chr5:110964855-110965222	0	0	0	0	NA
chr5	111109402	111111123	chr5:111109402-111111123	chr5	111538421	111540142	chr5:111538421-111540142	0	4	0	0.409214	NA
chr5	111173468	111174056	chr5:111173468-111174056	chr5	111602487	111603075	chr5:111602487-111603075	0	3	0	0.30691	NA
chr5	111868362	111899261	chr5:111868362-111899261	chr5	112297382	112328281	chr5:112297382-112328281	15	0	2.08155	0	NA
chr5	112110200	112111581	chr5:112110200-112111581	chr5	112539220	112540601	chr5:112539220-112540601	0	0	0	0	NA
chr5	113320454	113321706	chr5:113320454-113321706	chr5	113749474	113750726	chr5:113749474-113750726	0	0	0	0	NA
chr5	113339393	113340090	chr5:113339393-113340090	chr5	113768413	113769110	chr5:113768413-113769110	2	0	0.277539	0	NA
chr5	113340757	113340817	chr5:113340757-113340817	chr5	113769777	113769837	chr5:113769777-113769837	0	0	0	0	NA
chr5	113342068	113342150	chr5:113342068-113342150	chr5	113771088	113771170	chr5:113771088-113771170	1	0	0.13877	0	NA
chr5	113342327	113342411	chr5:113342327-113342411	chr5	113771347	113771431	chr5:113771347-113771431	1	0	0.13877	0	NA
chr5	113342660	113342725	chr5:113342660-113342725	chr5	113771680	113771745	chr5:113771680-113771745	0	0	0	0	NA
chr5	113343038	113343126	chr5:113343038-113343126	chr5	113772058	113772146	chr5:113772058-113772146	0	0	0	0	NA
chr5	113343181	113343306	chr5:113343181-113343306	chr5	113772201	113772326	chr5:113772201-113772326	0	0	0	0	NA
chr5	118469598	118475324	chr5:118469598-118475324	chr5	118919607	118925333	chr5:118919607-118925333	6	0	0.832618	0	NA
chr5	119495350	119512603	chr5:119495350-119512603	chr5	119945359	119962612	chr5:119945359-119962612	16	0	2.22032	0	NA
chr5	119504404	119504846	chr5:119504404-119504846	chr5	119954413	119954855	chr5:119954413-119954855	0	0	0	0	NA
chr5	119819334	119829533	chr5:119819334-119829533	chr5	120269343	120279542	chr5:120269343-120279542	9	0	1.24893	0	NA
chr5	122532434	122550044	chr5:122532434-122550044	chr5	122982443	123000053	chr5:122982443-123000053	0	0	0	0	NA
chr5	122543219	122543859	chr5:122543219-122543859	chr5	122993228	122993868	chr5:122993228-122993868	0	0	0	0	NA
chr5	122544389	122545008	chr5:122544389-122545008	chr5	122994398	122995017	chr5:122994398-122995017	0	0	0	0	NA
chr5	135896016	135896554	chr5:135896016-135896554	chr5	136371886	136372424	chr5:136371886-136372424	2	0	0.277539	0	NA
chr5	138754379	138754869	chr5:138754379-138754869	chr5	139230333	139230823	chr5:139230333-139230823	0	1	0	0.102303	NA
chr5	142368131	142368491	chr5:142368131-142368491	chr5	142844085	142844445	chr5:142844085-142844445	0	0	0	0	NA
chr5	143756832	143765202	chr5:143756832-143765202	chr5	144517701	144526071	chr5:144517701-144526071	0	0	0	0	NA
chr5	143758281	143766974	chr5:143758281-143766974	chr5	144519150	144527843	chr5:144519150-144527843	0	0	0	0	NA
chr5	148989761	148995223	chr5:148989761-148995223	chr5	149801337	149806799	chr5:149801337-149806799	4	0	0.555079	0	NA
chr5	150118744	150124847	chr5:150118744-150124847	chr5	150921319	150927422	chr5:150921319-150927422	1	0	0.13877	0	NA
chr5	151204013	151206209	chr5:151204013-151206209	chr5	152006588	152008784	chr5:152006588-152008784	1	0	0.13877	0	NA
chr5	151226983	151227643	chr5:151226983-151227643	chr5	152029558	152030218	chr5:152029558-152030218	0	0	0	0	NA
chr17	17178062	17323211	chr17:17178062-17323211	chr17	17315026	17460175	chr17:17315026-17460175	280	781	38.8555	79.899	1.04006
chr2	48950085	49118876	chr2:48950085-49118876	chr2	48805605	48974396	chr2:48805605-48974396	277	766	38.4392	78.3644	1.02762
chr5	23689752	23712733	chr5:23689752-23712733	chr5	23195570	23218551	chr5:23195570-23218551	329	736	45.6552	75.2953	0.72178
chr6	93079108	93081013	chr6:93079108-93081013	chr6	93029102	93031007	chr6:93029102-93031007	0	0	0	0	NA
chr17	6601784	6656325	chr17:6601784-6656325	chr17	6806501	6861042	chr17:6806501-6861042	382	722	53.01	73.8631	0.478588
chr6	91978965	91986893	chr6:91978965-91986893	chr6	91928959	91936887	chr6:91928959-91936887	7	0	0.971388	0	NA
chr6	91334624	91335076	chr6:91334624-91335076	chr6	91284618	91285070	chr6:91284618-91285070	2	0	0.277539	0	NA
chr6	91183129	91183353	chr6:91183129-91183353	chr6	91133123	91133347	chr6:91133123-91133347	0	0	0	0	NA
chr6	90987613	90988341	chr6:90987613-90988341	chr6	90937607	90938335	chr6:90937607-90938335	2	0	0.277539	0	NA
chr9	13420928	13619953	chr9:13420928-13619953	chr9	13224148	13424397	chr9:13224148-13424397	372	718	51.6223	73.4539	0.508843
chr8	122507511	122552060	chr8:122507511-122552060	chr8	125031411	125075960	chr8:125031411-125075960	306	716	42.4635	73.2493	0.78659
chr6	90799581	90800498	chr6:90799581-90800498	chr6	90749575	90750492	chr6:90749575-90750492	0	0	0	0	NA
chr3	96485928	96497155	chr3:96485928-96497155	chr3	96289851	96301078	chr3:96289851-96301078	437	710	60.6424	72.6354	0.260347
chr1	85716451	85735029	chr1:85716451-85735029	chr1	87613026	87631604	chr1:87613026-87631604	226	699	31.362	71.5101	1.18913
chr6	89257820	89259137	chr6:89257820-89259137	chr6	89207814	89209131	chr6:89207814-89209131	0	0	0	0	NA
chr3	96411963	96414833	chr3:96411963-96414833	chr3	96215886	96218756	chr3:96215886-96218756	292	687	40.5208	70.2825	0.794503
chr6	134925707	134981957	chr6:134925707-134981957	chr6	134875725	134931975	chr6:134875725-134931975	321	684	44.5451	69.9755	0.651585
chr6	86591430	86593604	chr6:86591430-86593604	chr6	86541424	86543598	chr6:86541424-86543598	1	0	0.13877	0	NA
chr15	73624995	73646845	chr15:73624995-73646845	chr15	73455425	73477275	chr15:73455425-73477275	223	666	30.9456	68.1341	1.13864
chr6	86530272	86531198	chr6:86530272-86531198	chr6	86480266	86481192	chr6:86480266-86481192	1	0	0.13877	0	NA
chrX	103549982	103623983	chrX:103549982-103623983	chrX	100745321	100819322	chrX:100745321-100819322	283	658	39.2718	67.3157	0.777447
chr6	31165516	31218433	chr6:31165516-31218433	chr6	31115516	31168433	chr6:31115516-31168433	327	647	45.3777	66.1903	0.544637
chr16	90037842	90127391	chr16:90037842-90127391	chr16	90038087	90127636	chr16:90038087-90127636	251	643	34.8312	65.7811	0.917293
chr1	192051777	192154918	chr1:192051777-192154918	chr1	193875658	193978800	chr1:193875658-193978800	310	641	43.0186	65.5765	0.608218
chr6	83891740	83892303	chr6:83891740-83892303	chr6	83841734	83842297	chr6:83841734-83842297	0	0	0	0	NA
chr5	23295241	23433919	chr5:23295241-23433919	chr5	22801059	22939737	chr5:22801059-22939737	363	630	50.3734	64.4512	0.355544
chr17	6456530	6477080	chr17:6456530-6477080	chr17	6455678	6476228	chr17:6455678-6476228	225	622	31.2232	63.6327	1.02715
chr7	15999504	16071903	chr7:15999504-16071903	chr7	16584853	16657252	chr7:16584853-16657252	197	621	27.3376	63.5304	1.21656
chr10	67096969	67185093	chr10:67096969-67185093	chr10	66559717	66647841	chr10:66559717-66647841	259	618	35.9414	63.2235	0.814816
chr5	23382166	23433840	chr5:23382166-23433840	chr5	22887984	22939658	chr5:22887984-22939658	341	614	47.3205	62.8143	0.408629
chr14	25257523	25457794	chr14:25257523-25457794	chr14	26077009	26277280	chr14:26077009-26277280	291	610	40.382	62.4051	0.627952
chrX	103560907	103623756	chrX:103560907-103623756	chrX	100756246	100819095	chrX:100756246-100819095	262	597	36.3577	61.0751	0.748326
chr1	137816740	138016789	chr1:137816740-138016789	chr1	139713317	139913366	chr1:139713317-139913366	331	594	45.9328	60.7682	0.403793
chr6	82635096	82635338	chr6:82635096-82635338	chr6	82585090	82585332	chr6:82585090-82585332	0	3	0	0.30691	NA
chr5	76759602	76790136	chr5:76759602-76790136	chr5	77188627	77219161	chr5:77188627-77219161	259	592	35.9414	60.5636	0.752807
chr6	82618786	82619086	chr6:82618786-82619086	chr6	82568780	82569080	chr6:82568780-82569080	0	0	0	0	NA
chr6	82318831	82322983	chr6:82318831-82322983	chr6	82268825	82272977	chr6:82268825-82272977	0	3	0	0.30691	NA
chr12	4133876	4243375	chr12:4133876-4243375	chr12	4133876	4243375	chr12:4133876-4243375	287	592	39.8269	60.5636	0.604708
chr6	67104396	67104863	chr6:67104396-67104863	chr6	67054390	67054857	chr6:67054390-67054857	2	0	0.277539	0	NA
chr10	16884145	17074269	chr10:16884145-17074269	chr10	16603951	16794075	chr10:16603951-16794075	252	590	34.97	60.359	0.787453
chr5	23384505	23433301	chr5:23384505-23433301	chr5	22890323	22939119	chr5:22890323-22939119	317	587	43.99	60.0521	0.449039
chr4	145411039	145558763	chr4:145411039-145558763	chr4	145000942	145148666	chr4:145000942-145148666	303	580	42.0472	59.336	0.496897
chr8	4325210	4348788	chr8:4325210-4348788	chr8	4325210	4348788	chr8:4325210-4348788	271	574	37.6066	58.7222	0.642919
chr6	6549225	6549832	chr6:6549225-6549832	chr6	6499225	6499832	chr6:6499225-6499832	0	0	0	0	NA
chr6	57745185	57745283	chr6:57745185-57745283	chr6	57695179	57695277	chr6:57695179-57695277	0	0	0	0	NA
chr5	23399780	23433336	chr5:23399780-23433336	chr5	22905598	22939154	chr5:22905598-22939154	299	571	41.4921	58.4153	0.493507
chr14	33110759	33190208	chr14:33110759-33190208	chr14	33923945	34003394	chr14:33923945-34003394	273	568	37.8841	58.1083	0.617152
chrX	50540527	50643523	chrX:50540527-50643523	chrX	47893704	47996700	chrX:47893704-47996700	339	566	47.0429	57.9037	0.299678
chr11	113037411	113201631	chr11:113037411-113201631	chr11	112898725	113062945	chr11:112898725-113062945	225	562	31.2232	57.4945	0.880807
chr14	33087967	33162943	chr14:33087967-33162943	chr14	33901153	33976129	chr14:33901153-33976129	254	562	35.2475	57.4945	0.705903
chr6	53858528	53867138	chr6:53858528-53867138	chr6	53808522	53817132	chr6:53808522-53817132	5	0	0.693849	0	NA
chr4	139097775	139132899	chr4:139097775-139132899	chr4	138653690	138688814	chr4:138653690-138688814	222	560	30.8069	57.2899	0.895029
chr11	113043888	113201631	chr11:113043888-113201631	chr11	112905202	113062945	chr11:112905202-113062945	225	558	31.2232	57.0853	0.870502
chr6	52082840	52083445	chr6:52082840-52083445	chr6	52032839	52033444	chr6:52032839-52033444	0	0	0	0	NA
chr6	51844616	51845281	chr6:51844616-51845281	chr6	51794615	51795280	chr6:51794615-51795280	0	0	0	0	NA
chr6	51592804	51594589	chr6:51592804-51594589	chr6	51542803	51544588	chr6:51542803-51544588	0	4	0	0.409214	NA
chrX	7212898	7319307	chrX:7212898-7319307	chrX	6790024	6896433	chrX:6790024-6896433	156	556	21.6481	56.8807	1.3937
chr19	5841104	5845579	chr19:5841104-5845579	chr19	5841104	5845579	chr19:5841104-5845579	189	553	26.2275	56.5738	1.10905
chr6	4891701	4897400	chr6:4891701-4897400	chr6	4841701	4847400	chr6:4841701-4847400	0	0	0	0	NA
chr6	48019968	48020584	chr6:48019968-48020584	chr6	47969967	47970583	chr6:47969967-47970583	0	0	0	0	NA
chr4	139101814	139131113	chr4:139101814-139131113	chr4	138657729	138687028	chr4:138657729-138687028	212	546	29.4192	55.8577	0.924998
chr6	48009827	48010503	chr6:48009827-48010503	chr6	47959826	47960502	chr6:47959826-47960502	0	0	0	0	NA
chr6	47978246	47978682	chr6:47978246-47978682	chr6	47928245	47928681	chr6:47928245-47928681	0	0	0	0	NA
chr6	47976999	47977876	chr6:47976999-47977876	chr6	47926998	47927875	chr6:47926998-47927875	0	0	0	0	NA
chr6	47967339	47967698	chr6:47967339-47967698	chr6	47917338	47917697	chr6:47917338-47917697	0	0	0	0	NA
chr6	47965491	47966090	chr6:47965491-47966090	chr6	47915490	47916089	chr6:47915490-47916089	0	4	0	0.409214	NA
chr5	23844161	23896210	chr5:23844161-23896210	chr5	23349979	23402028	chr5:23349979-23402028	327	524	45.3777	53.607	0.240438
chr6	28211666	28239840	chr6:28211666-28239840	chr6	28161666	28189840	chr6:28161666-28189840	179	521	24.8398	53.3001	1.10149
chr14	101434959	101606233	chr14:101434959-101606233	chr14	101834176	102005450	chr14:101834176-102005450	225	518	31.2232	52.9932	0.763189
chr7	3338401	3361136	chr7:3338401-3361136	chr7	3338501	3360725	chr7:3338501-3360725	8	0	1.11016	0	NA
chr7	6342995	6343891	chr7:6342995-6343891	chr7	6296219	6297115	chr7:6296219-6297115	0	0	0	0	NA
chr7	6349698	6353771	chr7:6349698-6353771					11	0	1.52647	0	NA
chr7	36695438	36696353	chr7:36695438-36696353	chr7	37480457	37481372	chr7:37480457-37481372	0	0	0	0	NA
chr7	41538648	41560447	chr7:41538648-41560447	chr7	48794018	48815817	chr7:48794018-48815817	0	0	0	0	NA
chr7	43147731	43162805	chr7:43147731-43162805	chr7	50403101	50418175	chr7:50403101-50418175	0	4	0	0.409214	NA
chr7	59902651	59905404	chr7:59902651-59905404	chr7	67047537	67050290	chr7:67047537-67050290	0	0	0	0	NA
chr7	59966376	59975759	chr7:59966376-59975759	chr7	67111262	67120645	chr7:67111262-67120645	0	0	0	0	NA
chr7	59966376	59975811	chr7:59966376-59975811	chr7	67111262	67120697	chr7:67111262-67120697	0	0	0	0	NA
chr7	59974650	59975327	chr7:59974650-59975327	chr7	67119536	67120213	chr7:67119536-67120213	0	0	0	0	NA
chr7	61860406	61862927	chr7:61860406-61862927	chr7	69005292	69007813	chr7:69005292-69007813	0	0	0	0	NA
chr7	61930137	61982356	chr7:61930137-61982356	chr7	69075023	69127242	chr7:69075023-69127242	16	0	2.22032	0	NA
chr7	61936959	61938742	chr7:61936959-61938742	chr7	69081845	69083628	chr7:69081845-69083628	0	0	0	0	NA
chr7	61943899	61945020	chr7:61943899-61945020	chr7	69088785	69089906	chr7:69088785-69089906	0	0	0	0	NA
chr7	61972942	61982356	chr7:61972942-61982356	chr7	69117828	69127242	chr7:69117828-69127242	4	0	0.555079	0	NA
chr7	63948678	63950208	chr7:63948678-63950208	chr7	71093564	71095094	chr7:71093564-71095094	0	0	0	0	NA
chr7	64075771	64076726	chr7:64075771-64076726	chr7	71220657	71221612	chr7:71220657-71221612	0	0	0	0	NA
chr7	64076941	64077915	chr7:64076941-64077915	chr7	71221827	71222801	chr7:71221827-71222801	0	0	0	0	NA
chr7	64078014	64085728	chr7:64078014-64085728	chr7	71222900	71230614	chr7:71222900-71230614	0	0	0	0	NA
chr7	64083002	64086151	chr7:64083002-64086151	chr7	71227888	71231037	chr7:71227888-71231037	0	0	0	0	NA
chr7	64086212	64088794	chr7:64086212-64088794	chr7	71231098	71233680	chr7:71231098-71233680	2	0	0.277539	0	NA
chr7	73621993	73622610	chr7:73621993-73622610	chr7	80766879	80767496	chr7:80766879-80767496	0	0	0	0	NA
chr7	79507063	79530337	chr7:79507063-79530337	chr7	86651949	86675223	chr7:86651949-86675223	20	0	2.77539	0	NA
chr7	79516146	79516672	chr7:79516146-79516672	chr7	86661032	86661558	chr7:86661032-86661558	2	0	0.277539	0	NA
chr7	79518078	79518763	chr7:79518078-79518763	chr7	86662964	86663649	chr7:86662964-86663649	0	0	0	0	NA
chr7	84152140	84153673	chr7:84152140-84153673	chr7	91300650	91302183	chr7:91300650-91302183	0	2	0	0.204607	NA
chr7	93046939	93047384	chr7:93046939-93047384	chr7	100195449	100195894	chr7:100195449-100195894	0	0	0	0	NA
chr7	99376498	99377151	chr7:99376498-99377151	chr7	106525008	106525661	chr7:106525008-106525661	0	0	0	0	NA
chr7	99380633	99381242	chr7:99380633-99381242	chr7	106529143	106529752	chr7:106529143-106529752	2	0	0.277539	0	NA
chr7	100078407	100079162	chr7:100078407-100079162	chr7	107226917	107227672	chr7:107226917-107227672	0	0	0	0	NA
chr7	101061483	101067518	chr7:101061483-101067518	chr7	108209997	108216032	chr7:108209997-108216032	2	0	0.277539	0	NA
chr7	101097748	101099322	chr7:101097748-101099322	chr7	108246262	108247836	chr7:108246262-108247836	0	0	0	0	NA
chr7	101105443	101105871	chr7:101105443-101105871	chr7	108253957	108254385	chr7:108253957-108254385	0	0	0	0	NA
chr7	104378430	104396579	chr7:104378430-104396579	chr7	111526944	111545093	chr7:111526944-111545093	0	0	0	0	NA
chr7	104382065	104390583	chr7:104382065-104390583	chr7	111530579	111539097	chr7:111530579-111539097	0	0	0	0	NA
chr7	105785640	105794664	chr7:105785640-105794664	chr7	112934154	112943178	chr7:112934154-112943178	2	0	0.277539	0	NA
chr7	109997374	110009048	chr7:109997374-110009048	chr7	117140888	117152562	chr7:117140888-117152562	6	0	0.832618	0	NA
chr7	110001140	110006631	chr7:110001140-110006631	chr7	117144654	117150145	chr7:117144654-117150145	2	0	0.277539	0	NA
chr7	112666174	112667896	chr7:112666174-112667896	chr7	119809688	119811410	chr7:119809688-119811410	0	0	0	0	NA
chr7	114145962	114166886	chr7:114145962-114166886	chr7	121289476	121310400	chr7:121289476-121310400	4	0	0.555079	0	NA
chr7	122151485	122151984	chr7:122151485-122151984	chr7	129294999	129295498	chr7:129294999-129295498	4	0	0.555079	0	NA
chr7	122152032	122152397	chr7:122152032-122152397	chr7	129295546	129295911	chr7:129295546-129295911	0	0	0	0	NA
chr7	124675853	124709352	chr7:124675853-124709352	chr7	131819367	131852866	chr7:131819367-131852866	9	0	1.24893	0	NA
chr7	127231203	127231772	chr7:127231203-127231772	chr7	134374717	134375286	chr7:134374717-134375286	0	4	0	0.409214	NA
chr7	127500045	127500542	chr7:127500045-127500542	chr7	134643559	134644056	chr7:134643559-134644056	0	1	0	0.102303	NA
chr7	127506331	127508037	chr7:127506331-127508037	chr7	134649845	134651551	chr7:134649845-134651551	0	2	0	0.204607	NA
chr7	127664348	127665487	chr7:127664348-127665487	chr7	134807862	134809001	chr7:134807862-134809001	0	4	0	0.409214	NA
chr7	132820371	132820826	chr7:132820371-132820826	chr7	140012054	140012509	chr7:140012054-140012509	0	2	0	0.204607	NA
chr7	132824554	132825089	chr7:132824554-132825089	chr7	140016237	140016772	chr7:140016237-140016772	0	0	0	0	NA
chr7	132826156	132826240	chr7:132826156-132826240	chr7	140017839	140017923	chr7:140017839-140017923	2	0	0.277539	0	NA
chr7	132826810	132827381	chr7:132826810-132827381	chr7	140018493	140019064	chr7:140018493-140019064	0	0	0	0	NA
chr7	134425278	134498984	chr7:134425278-134498984	chr7	141616961	141690667	chr7:141616961-141690667	30	0	4.16309	0	NA
chr7	136568018	136568464	chr7:136568018-136568464	chr7	143759701	143760147	chr7:143759701-143760147	0	0	0	0	NA
chr7	142575531	142578114	chr7:142575531-142578114	chr7	149761436	149764019	chr7:149761436-149764019	2	0	0.277539	0	NA
chr8	8716924	8720799	chr8:8716924-8720799	chr8	8716924	8720799	chr8:8716924-8720799	0	0	0	0	NA
chr8	12278819	12280657	chr8:12278819-12280657	chr8	12278819	12280657	chr8:12278819-12280657	2	0	0.277539	0	NA
chr8	12535649	12544923	chr8:12535649-12544923	chr8	12535649	12544923	chr8:12535649-12544923	6	0	0.832618	0	NA
chr8	12873806	12880007	chr8:12873806-12880007	chr8	12873806	12880007	chr8:12873806-12880007	0	7	0	0.716124	NA
chr8	13200728	13207714	chr8:13200728-13207714	chr8	13200728	13207714	chr8:13200728-13207714	7	0	0.971388	0	NA
chr8	13692700	13696311	chr8:13692700-13696311	chr8	13692700	13696311	chr8:13692700-13696311	2	0	0.277539	0	NA
chr8	15580279	15583962	chr8:15580279-15583962	chr8	15580279	15583962	chr8:15580279-15583962	0	0	0	0	NA
chr8	18592438	18593034	chr8:18592438-18593034	chr8	18592438	18593034	chr8:18592438-18593034	2	0	0.277539	0	NA
chr8	18903600	18904143	chr8:18903600-18904143	chr8	18903600	18904143	chr8:18903600-18904143	0	0	0	0	NA
chr8	19759349	19759959	chr8:19759349-19759959	chr8	19759349	19759959	chr8:19759349-19759959	0	2	0	0.204607	NA
chr8	23218778	23219069	chr8:23218778-23219069	chr8	24329250	24329541	chr8:24329250-24329541	0	0	0	0	NA
chr8	23221141	23221375	chr8:23221141-23221375	chr8	24331613	24331847	chr8:24331613-24331847	0	0	0	0	NA
chr8	25232806	25242430	chr8:25232806-25242430	chr8	26343278	26352902	chr8:26343278-26352902	20	0	2.77539	0	NA
chr8	25235100	25235623	chr8:25235100-25235623	chr8	26345572	26346095	chr8:26345572-26346095	3	0	0.416309	0	NA
chr8	25237002	25237580	chr8:25237002-25237580	chr8	26347474	26348052	chr8:26347474-26348052	2	0	0.277539	0	NA
chr8	26021424	26022362	chr8:26021424-26022362	chr8	27131896	27132834	chr8:27131896-27132834	0	10	0	1.02303	NA
chr8	26022619	26023262	chr8:26022619-26023262	chr8	27133091	27133734	chr8:27133091-27133734	0	1	0	0.102303	NA
chr8	27235040	27250633	chr8:27235040-27250633	chr8	28345512	28361105	chr8:28345512-28361105	7	0	0.971388	0	NA
chr8	33536316	33569840	chr8:33536316-33569840	chr8	34646788	34680312	chr8:34646788-34680312	7	0	0.971388	0	NA
chr8	34080748	34081428	chr8:34080748-34081428	chr8	35143802	35144482	chr8:35143802-35144482	0	0	0	0	NA
chr8	36174140	36176016	chr8:36174140-36176016	chr8	37237194	37239070	chr8:37237194-37239070	2	0	0.277539	0	NA
chr8	36519104	36519748	chr8:36519104-36519748	chr8	37582158	37582802	chr8:37582158-37582802	0	0	0	0	NA
chr8	36527136	36527578	chr8:36527136-36527578	chr8	37590190	37590632	chr8:37590190-37590632	0	0	0	0	NA
chr8	36549619	36551453	chr8:36549619-36551453	chr8	37612673	37614507	chr8:37612673-37614507	0	0	0	0	NA
chr8	39171656	39173423	chr8:39171656-39173423	chr8	40257010	40258777	chr8:40257010-40258777	6	0	0.832618	0	NA
chr8	40650551	40660387	chr8:40650551-40660387	chr8	41735905	41745741	chr8:41735905-41745741	0	1	0	0.102303	NA
chr8	40855731	40862276	chr8:40855731-40862276	chr8	41941085	41947630	chr8:41941085-41947630	1	0	0.13877	0	NA
chr8	47391284	47407183	chr8:47391284-47407183	chr8	48476638	48492537	chr8:48476638-48492537	4	0	0.555079	0	NA
chr8	47394871	47395344	chr8:47394871-47395344	chr8	48480225	48480698	chr8:48480225-48480698	0	0	0	0	NA
chr8	47400142	47400511	chr8:47400142-47400511	chr8	48485496	48485865	chr8:48485496-48485865	0	0	0	0	NA
chr8	48773418	48773656	chr8:48773418-48773656	chr8	49858772	49859010	chr8:49858772-49859010	0	0	0	0	NA
chr8	48777545	48778143	chr8:48777545-48778143	chr8	49862899	49863497	chr8:49862899-49863497	0	0	0	0	NA
chr8	48779974	48780285	chr8:48779974-48780285	chr8	49865328	49865639	chr8:49865328-49865639	0	0	0	0	NA
chr8	48780844	48781487	chr8:48780844-48781487	chr8	49866198	49866841	chr8:49866198-49866841	0	0	0	0	NA
chr8	48787333	48787559	chr8:48787333-48787559	chr8	49872687	49872913	chr8:49872687-49872913	0	0	0	0	NA
chr8	48826243	48826842	chr8:48826243-48826842	chr8	49911597	49912196	chr8:49911597-49912196	0	2	0	0.204607	NA
chr8	48829751	48830350	chr8:48829751-48830350	chr8	49915105	49915704	chr8:49915105-49915704	1	0	0.13877	0	NA
chr8	53571339	53571884	chr8:53571339-53571884	chr8	54656693	54657238	chr8:54656693-54657238	0	0	0	0	NA
chr8	53575505	53576598	chr8:53575505-53576598	chr8	54660859	54661952	chr8:54660859-54661952	0	2	0	0.204607	NA
chr8	55484021	55486614	chr8:55484021-55486614	chr8	57979700	57982206	chr8:57979700-57982206	0	0	0	0	NA
chr8	55508749	55509607	chr8:55508749-55509607	chr8	57987540	57988398	chr8:57987540-57988398	0	0	0	0	NA
chr8	55511051	55513026	chr8:55511051-55513026	chr8	57989842	57991823	chr8:57989842-57991823	5	0	0.693849	0	NA
chr8	55515514	55520288	chr8:55515514-55520288	chr8	57994311	57999085	chr8:57994311-57999085	3	0	0.416309	0	NA
chr8	57662925	57663426	chr8:57662925-57663426	chr8	60141722	60142223	chr8:60141722-60142223	0	4	0	0.409214	NA
chr8	65018816	65037795	chr8:65018816-65037795	chr8	67542715	67561694	chr8:67542715-67561694	4	0	0.555079	0	NA
chr8	65026166	65037088	chr8:65026166-65037088	chr8	67550065	67560987	chr8:67550065-67560987	4	0	0.555079	0	NA
chr8	65028417	65037336	chr8:65028417-65037336	chr8	67552316	67561235	chr8:67552316-67561235	4	0	0.555079	0	NA
chr8	66892919	66893684	chr8:66892919-66893684	chr8	69416818	69417583	chr8:69416818-69417583	0	0	0	0	NA
chr8	68195281	68195787	chr8:68195281-68195787	chr8	70719180	70719686	chr8:70719180-70719686	0	0	0	0	NA
chr8	68971145	69001683	chr8:68971145-69001683	chr8	71495044	71525582	chr8:71495044-71525582	7	0	0.971388	0	NA
chr8	69002994	69003601	chr8:69002994-69003601	chr8	71526893	71527500	chr8:71526893-71527500	0	0	0	0	NA
chr8	71139324	71171456	chr8:71139324-71171456	chr8	73663223	73695355	chr8:73663223-73695355	5	0	0.693849	0	NA
chr8	84181796	84187345	chr8:84181796-84187345	chr8	86705695	86711244	chr8:86705695-86711244	2	0	0.277539	0	NA
chr8	84182739	84183105	chr8:84182739-84183105	chr8	86706638	86707004	chr8:86706638-86707004	0	0	0	0	NA
chr8	84194553	84194933	chr8:84194553-84194933	chr8	86718452	86718832	chr8:86718452-86718832	0	0	0	0	NA
chr8	84989496	84990208	chr8:84989496-84990208	chr8	87513395	87514107	chr8:87513395-87514107	0	0	0	0	NA
chr8	87525042	87525562	chr8:87525042-87525562	chr8	90048941	90049461	chr8:90048941-90049461	2	0	0.277539	0	NA
chr8	89006388	89006596	chr8:89006388-89006596	chr8	91530287	91530495	chr8:91530287-91530495	2	0	0.277539	0	NA
chr8	89045471	89070220	chr8:89045471-89070220	chr8	91569370	91594119	chr8:91569370-91594119	2	0	0.277539	0	NA
chr8	89047745	89052979	chr8:89047745-89052979	chr8	91571644	91576878	chr8:91571644-91576878	0	0	0	0	NA
chr8	103513901	103546125	chr8:103513901-103546125	chr8	106037801	106070025	chr8:106037801-106070025	4	0	0.555079	0	NA
chr8	104068751	104079625	chr8:104068751-104079625	chr8	106592651	106603525	chr8:106592651-106603525	0	0	0	0	NA
chr8	104095443	104100951	chr8:104095443-104100951	chr8	106619343	106624851	chr8:106619343-106624851	4	0	0.555079	0	NA
chr8	107673272	107682646	chr8:107673272-107682646	chr8	110197172	110206546	chr8:110197172-110206546	4	0	0.555079	0	NA
chr8	109242497	109248371	chr8:109242497-109248371	chr8	111766397	111772271	chr8:111766397-111772271	0	0	0	0	NA
chr8	115432861	115434972	chr8:115432861-115434972	chr8	117956761	117958872	chr8:117956761-117958872	0	0	0	0	NA
chr8	115913995	115914430	chr8:115913995-115914430	chr8	118437895	118438330	chr8:118437895-118438330	0	0	0	0	NA
chr8	116566667	116573835	chr8:116566667-116573835	chr8	119090567	119097735	chr8:119090567-119097735	0	0	0	0	NA
chr8	116568724	116570319	chr8:116568724-116570319	chr8	119092624	119094219	chr8:119092624-119094219	0	0	0	0	NA
chr8	120263790	120264188	chr8:120263790-120264188	chr8	122787690	122788088	chr8:122787690-122788088	0	0	0	0	NA
chr8	120265076	120265324	chr8:120265076-120265324	chr8	122788976	122789224	chr8:122788976-122789224	1	0	0.13877	0	NA
chr8	120319277	120320382	chr8:120319277-120320382	chr8	122843177	122844282	chr8:122843177-122844282	0	2	0	0.204607	NA
chr8	120405025	120405656	chr8:120405025-120405656	chr8	122928925	122929556	chr8:122928925-122929556	0	0	0	0	NA
chr8	120421844	120422292	chr8:120421844-120422292	chr8	122945744	122946192	chr8:122945744-122946192	2	0	0.277539	0	NA
chr8	120424018	120424253	chr8:120424018-120424253	chr8	122947918	122948153	chr8:122947918-122948153	2	0	0.277539	0	NA
chr8	120439691	120440226	chr8:120439691-120440226	chr8	122963591	122964126	chr8:122963591-122964126	0	2	0	0.204607	NA
chr8	120470616	120470843	chr8:120470616-120470843	chr8	122994516	122994743	chr8:122994516-122994743	0	0	0	0	NA
chr8	121126340	121126415	chr8:121126340-121126415	chr8	123650240	123650315	chr8:123650240-123650315	0	0	0	0	NA
chr8	121377916	121378267	chr8:121377916-121378267	chr8	123901816	123902167	chr8:123901816-123902167	0	0	0	0	NA
chr8	121873513	121874122	chr8:121873513-121874122	chr8	124397413	124398022	chr8:124397413-124398022	0	0	0	0	NA
chr8	122166793	122167350	chr8:122166793-122167350	chr8	124690693	124691250	chr8:124690693-124691250	0	0	0	0	NA
chr8	122173936	122175113	chr8:122173936-122175113	chr8	124697836	124699013	chr8:124697836-124699013	0	0	0	0	NA
chr8	122190048	122190399	chr8:122190048-122190399	chr8	124713948	124714299	chr8:124713948-124714299	0	0	0	0	NA
chr8	123872701	123883375	chr8:123872701-123883375	chr8	126396601	126407275	chr8:126396601-126407275	3	0	0.416309	0	NA
chr8	128644376	128658225	chr8:128644376-128658225	chr8	131168276	131182125	chr8:131168276-131182125	0	2	0	0.204607	NA
chr8	128654313	128656757	chr8:128654313-128656757	chr8	131178213	131180657	chr8:131178213-131180657	0	2	0	0.204607	NA
chr9	4260789	4261404	chr9:4260789-4261404	chr9	4260789	4261404	chr9:4260789-4261404	0	0	0	0	NA
chr9	24503414	24504874	chr9:24503414-24504874	chr9	24307858	24309318	chr9:24307858-24309318	0	4	0	0.409214	NA
chr9	27345832	27346092	chr9:27345832-27346092	chr9	27153417	27153677	chr9:27153417-27153677	0	0	0	0	NA
chr9	27348101	27348515	chr9:27348101-27348515	chr9	27155686	27156100	chr9:27155686-27156100	2	0	0.277539	0	NA
chr9	30722125	30781457	chr9:30722125-30781457	chr9	30529710	30589042	chr9:30529710-30589042	4	0	0.555079	0	NA
chr9	32066217	32066822	chr9:32066217-32066822	chr9	31873802	31874407	chr9:31873802-31874407	0	0	0	0	NA
chr9	32608539	32608975	chr9:32608539-32608975	chr9	32416124	32416560	chr9:32416124-32416560	0	0	0	0	NA
chr9	34384780	34385225	chr9:34384780-34385225	chr9	34192365	34192810	chr9:34192365-34192810	0	0	0	0	NA
chr9	34388091	34388751	chr9:34388091-34388751	chr9	34195676	34196336	chr9:34195676-34196336	0	0	0	0	NA
chr9	36703982	36704552	chr9:36703982-36704552	chr9	36511567	36512137	chr9:36511567-36512137	0	2	0	0.204607	NA
chr9	37255738	37256133	chr9:37255738-37256133	chr9	37063323	37063718	chr9:37063323-37063718	0	2	0	0.204607	NA
chr9	37264093	37264659	chr9:37264093-37264659	chr9	37071678	37072244	chr9:37071678-37072244	0	0	0	0	NA
chr9	40179245	40179839	chr9:40179245-40179839	chr9	39986830	39987424	chr9:39986830-39987424	0	5	0	0.511517	NA
chr9	40221760	40242575	chr9:40221760-40242575	chr9	40029345	40050160	chr9:40029345-40050160	2	0	0.277539	0	NA
chr9	40223472	40224102	chr9:40223472-40224102	chr9	40031057	40031687	chr9:40031057-40031687	0	0	0	0	NA
chr9	40225418	40225954	chr9:40225418-40225954	chr9	40033003	40033539	chr9:40033003-40033539	0	0	0	0	NA
chr9	40458443	40458875	chr9:40458443-40458875	chr9	40266028	40266460	chr9:40266028-40266460	0	2	0	0.204607	NA
chr9	40460662	40460856	chr9:40460662-40460856	chr9	40268247	40268441	chr9:40268247-40268441	0	0	0	0	NA
chr9	40462853	40463446	chr9:40462853-40463446	chr9	40270438	40271031	chr9:40270438-40271031	0	0	0	0	NA
chr9	41376397	41432079	chr9:41376397-41432079	chr9	41184480	41240162	chr9:41184480-41240162	17	0	2.35909	0	NA
chr9	41492055	41493473	chr9:41492055-41493473	chr9	41300138	41301556	chr9:41300138-41301556	0	0	0	0	NA
chr9	41560741	41561431	chr9:41560741-41561431	chr9	41368824	41369514	chr9:41368824-41369514	0	0	0	0	NA
chr9	41614237	41617772	chr9:41614237-41617772	chr9	41422320	41425855	chr9:41422320-41425855	0	0	0	0	NA
chr9	43734114	43736413	chr9:43734114-43736413	chr9	43542197	43544496	chr9:43542197-43544496	3	0	0.416309	0	NA
chr9	46856190	46856606	chr9:46856190-46856606	chr9	46664273	46664689	chr9:46664273-46664689	2	0	0.277539	0	NA
chr9	52097695	52098172	chr9:52097695-52098172	chr9	51905800	51906277	chr9:51905800-51906277	2	0	0.277539	0	NA
chr9	53765387	53766064	chr9:53765387-53766064	chr9	53613194	53613871	chr9:53613194-53613871	6	0	0.832618	0	NA
chr9	56073341	56073756	chr9:56073341-56073756	chr9	55921148	55921563	chr9:55921148-55921563	3	0	0.416309	0	NA
chr9	56078187	56078776	chr9:56078187-56078776	chr9	55925994	55926583	chr9:55925994-55926583	0	0	0	0	NA
chr9	56531864	56582015	chr9:56531864-56582015	chr9	56379671	56429822	chr9:56379671-56429822	68	0	9.43634	0	NA
chr9	56543756	56544335	chr9:56543756-56544335	chr9	56391563	56392142	chr9:56391563-56392142	2	0	0.277539	0	NA
chr9	56798962	56801261	chr9:56798962-56801261	chr9	56646769	56649068	chr9:56646769-56649068	4	0	0.555079	0	NA
chr9	56806699	56807152	chr9:56806699-56807152	chr9	56654506	56654959	chr9:56654506-56654959	1	0	0.13877	0	NA
chr9	57064515	57065125	chr9:57064515-57065125	chr9	56912322	56912932	chr9:56912322-56912932	6	0	0.832618	0	NA
chr9	57065535	57066094	chr9:57065535-57066094	chr9	56913342	56913901	chr9:56913342-56913901	0	1	0	0.102303	NA
chr9	57066279	57066682	chr9:57066279-57066682	chr9	56914086	56914489	chr9:56914086-56914489	0	2	0	0.204607	NA
chr9	58117309	58118807	chr9:58117309-58118807	chr9	57965116	57966614	chr9:57965116-57966614	0	0	0	0	NA
chr9	58349307	58352807	chr9:58349307-58352807	chr9	58197114	58200614	chr9:58197114-58200614	0	1	0	0.102303	NA
chr9	61224038	61224517	chr9:61224038-61224517	chr9	61071845	61072324	chr9:61071845-61072324	1	0	0.13877	0	NA
chr9	61228245	61228507	chr9:61228245-61228507	chr9	61076052	61076314	chr9:61076052-61076314	0	0	0	0	NA
chr9	61229478	61229944	chr9:61229478-61229944	chr9	61077285	61077751	chr9:61077285-61077751	0	0	0	0	NA
chr9	62033367	62033544	chr9:62033367-62033544	chr9	61881174	61881351	chr9:61881174-61881351	0	0	0	0	NA
chr9	62033690	62034128	chr9:62033690-62034128	chr9	61881497	61881935	chr9:61881497-61881935	0	0	0	0	NA
chr9	65241924	65244090	chr9:65241924-65244090	chr9	65089731	65091897	chr9:65089731-65091897	2	0	0.277539	0	NA
chr9	71834091	71834691	chr9:71834091-71834691	chr9	71681898	71682498	chr9:71681898-71682498	1	0	0.13877	0	NA
chr9	75482851	75484834	chr9:75482851-75484834	chr9	75330658	75332641	chr9:75330658-75332641	0	2	0	0.204607	NA
chr9	78001465	78002122	chr9:78001465-78002122	chr9	77849272	77849929	chr9:77849272-77849929	0	0	0	0	NA
chr9	78257129	78269167	chr9:78257129-78269167	chr9	78104936	78116974	chr9:78104936-78116974	4	0	0.555079	0	NA
chr9	78259419	78271043	chr9:78259419-78271043	chr9	78107226	78118850	chr9:78107226-78118850	6	0	0.832618	0	NA
chr9	78519967	78526916	chr9:78519967-78526916	chr9	78367774	78374723	chr9:78367774-78374723	2	0	0.277539	0	NA
chr9	78520891	78521288	chr9:78520891-78521288	chr9	78368698	78369095	chr9:78368698-78369095	0	0	0	0	NA
chr9	78521319	78521994	chr9:78521319-78521994	chr9	78369126	78369801	chr9:78369126-78369801	0	0	0	0	NA
chr9	78524347	78525027	chr9:78524347-78525027	chr9	78372154	78372834	chr9:78372154-78372834	0	0	0	0	NA
chr9	78525986	78526496	chr9:78525986-78526496	chr9	78373793	78374303	chr9:78373793-78374303	0	0	0	0	NA
chr9	81642589	81644629	chr9:81642589-81644629	chr9	81536196	81538236	chr9:81536196-81538236	0	0	0	0	NA
chr9	82630455	82632771	chr9:82630455-82632771	chr9	82524062	82526378	chr9:82524062-82526378	0	0	0	0	NA
chr9	83098224	83106330	chr9:83098224-83106330	chr9	82991831	82999937	chr9:82991831-82999937	0	0	0	0	NA
chr9	89265070	89265977	chr9:89265070-89265977	chr9	89159908	89160815	chr9:89159908-89160815	0	0	0	0	NA
chr9	89272335	89274142	chr9:89272335-89274142	chr9	89167173	89168980	chr9:89167173-89168980	2	0	0.277539	0	NA
chr9	95395041	95400847	chr9:95395041-95400847	chr9	95295460	95301266	chr9:95295460-95301266	0	0	0	0	NA
chr9	98953789	98955179	chr9:98953789-98955179	chr9	98854208	98855598	chr9:98854208-98855598	2	0	0.277539	0	NA
chr9	106268588	106275563	chr9:106268588-106275563	chr9	106170919	106177894	chr9:106170919-106177894	8	0	1.11016	0	NA
chr9	113324249	113352369	chr9:113324249-113352369	chr9	113233367	113261487	chr9:113233367-113261487	8	0	1.11016	0	NA
chr9	113767418	113768045	chr9:113767418-113768045	chr9	113676536	113677163	chr9:113676536-113677163	4	0	0.555079	0	NA
chr9	114507137	114507726	chr9:114507137-114507726	chr9	114416255	114416844	chr9:114416255-114416844	2	0	0.277539	0	NA
chr9	121184383	121195432	chr9:121184383-121195432	chr9	121093501	121104550	chr9:121093501-121104550	8	0	1.11016	0	NA
chr9	121347621	121348369	chr9:121347621-121348369	chr9	121256739	121257487	chr9:121256739-121257487	0	0	0	0	NA
chr9	121936803	121949002	chr9:121936803-121949002	chr9	121845921	121858120	chr9:121845921-121858120	18	0	2.49785	0	NA
chr9	121937223	121939460	chr9:121937223-121939460	chr9	121846341	121848578	chr9:121846341-121848578	8	0	1.11016	0	NA
chr10	3848678	3849316	chr10:3848678-3849316	chr10	6497225	6497863	chr10:6497225-6497863	0	0	0	0	NA
chr10	4242427	4242652	chr10:4242427-4242652	chr10	6103889	6104114	chr10:6103889-6104114	0	0	0	0	NA
chr10	7112953	7118700	chr10:7112953-7118700	chr10	3227841	3233588	chr10:3227841-3233588	4	0	0.555079	0	NA
chr10	7114739	7115203	chr10:7114739-7115203	chr10	3231338	3231802	chr10:3231338-3231802	0	0	0	0	NA
chr10	7116685	7117136	chr10:7116685-7117136	chr10	3229405	3229856	chr10:3229405-3229856	2	0	0.277539	0	NA
chr10	8942964	8945303	chr10:8942964-8945303	chr10	8662762	8665101	chr10:8662762-8665101	0	0	0	0	NA
chr10	9602511	9612385	chr10:9602511-9612385	chr10	9322309	9332183	chr10:9322309-9332183	3	0	0.416309	0	NA
chr10	15168303	15258502	chr10:15168303-15258502	chr10	14888109	14978308	chr10:14888109-14978308	13	0	1.80401	0	NA
chr10	17537476	17537951	chr10:17537476-17537951	chr10	17257282	17257757	chr10:17257282-17257757	1	0	0.13877	0	NA
chr10	18316685	18340159	chr10:18316685-18340159	chr10	18036491	18059965	chr10:18036491-18059965	4	0	0.555079	0	NA
chr10	18328046	18329835	chr10:18328046-18329835	chr10	18047852	18049641	chr10:18047852-18049641	0	0	0	0	NA
chr10	18384504	18385075	chr10:18384504-18385075	chr10	18104310	18104881	chr10:18104310-18104881	0	0	0	0	NA
chr10	21743867	21747006	chr10:21743867-21747006	chr10	21463673	21466812	chr10:21463673-21466812	0	0	0	0	NA
chr10	21968310	21991084	chr10:21968310-21991084	chr10	21688116	21710890	chr10:21688116-21710890	3	0	0.416309	0	NA
chr10	21990739	21991136	chr10:21990739-21991136	chr10	21710545	21710942	chr10:21710545-21710942	0	0	0	0	NA
chr10	24549360	24556884	chr10:24549360-24556884	chr10	24269166	24276690	chr10:24269166-24276690	0	0	0	0	NA
chr10	24549512	24550339	chr10:24549512-24550339	chr10	24269318	24270145	chr10:24269318-24270145	0	0	0	0	NA
chr10	24553494	24557283	chr10:24553494-24557283	chr10	24273300	24277089	chr10:24273300-24277089	0	0	0	0	NA
chr10	25699295	25710269	chr10:25699295-25710269	chr10	25419101	25430075	chr10:25419101-25430075	2	0	0.277539	0	NA
chr10	39249592	39253168	chr10:39249592-39253168	chr10	38969398	38972974	chr10:38969398-38972974	0	0	0	0	NA
chr10	39254472	39255100	chr10:39254472-39255100	chr10	38974278	38974906	chr10:38974278-38974906	0	0	0	0	NA
chr10	39595855	39597217	chr10:39595855-39597217	chr10	39315661	39317023	chr10:39315661-39317023	2	0	0.277539	0	NA
chr10	39686095	39686733	chr10:39686095-39686733	chr10	39405901	39406539	chr10:39405901-39406539	0	2	0	0.204607	NA
chr10	39887477	39899714	chr10:39887477-39899714	chr10	39607283	39619520	chr10:39607283-39619520	6	0	0.832618	0	NA
chr10	39939620	39954394	chr10:39939620-39954394	chr10	39659426	39674200	chr10:39659426-39674200	5	0	0.693849	0	NA
chr10	39946914	39960153	chr10:39946914-39960153	chr10	39666720	39679959	chr10:39666720-39679959	5	0	0.693849	0	NA
chr10	42971283	42991162	chr10:42971283-42991162	chr10	42691089	42710968	chr10:42691089-42710968	8	0	1.11016	0	NA
chr10	44432026	44432603	chr10:44432026-44432603	chr10	44151832	44152409	chr10:44151832-44152409	0	0	0	0	NA
chr10	44987646	44987887	chr10:44987646-44987887	chr10	44707452	44707693	chr10:44707452-44707693	0	0	0	0	NA
chr10	57829799	57830150	chr10:57829799-57830150	chr10	57549605	57549956	chr10:57549605-57549956	0	0	0	0	NA
chr10	57830440	57830615	chr10:57830440-57830615	chr10	57550246	57550421	chr10:57550246-57550421	0	0	0	0	NA
chr10	59920075	59920894	chr10:59920075-59920894	chr10	59382823	59383642	chr10:59382823-59383642	2	0	0.277539	0	NA
chr10	59922317	59922688	chr10:59922317-59922688	chr10	59385065	59385436	chr10:59385065-59385436	2	0	0.277539	0	NA
chr10	62023404	62025615	chr10:62023404-62025615	chr10	61486152	61488363	chr10:61486152-61488363	2	0	0.277539	0	NA
chr10	62035692	62036185	chr10:62035692-62036185	chr10	61498440	61498933	chr10:61498440-61498933	0	0	0	0	NA
chr10	62603642	62604484	chr10:62603642-62604484	chr10	62066390	62067232	chr10:62066390-62067232	0	12	0	1.22764	NA
chr10	62885129	62911598	chr10:62885129-62911598	chr10	62347877	62374346	chr10:62347877-62374346	12	0	1.66524	0	NA
chr10	62897920	62898505	chr10:62897920-62898505	chr10	62360668	62361253	chr10:62360668-62361253	0	0	0	0	NA
chr10	67111674	67112740	chr10:67111674-67112740	chr10	66574422	66575488	chr10:66574422-66575488	0	24	0	2.45528	NA
chr10	70204664	70215285	chr10:70204664-70215285	chr10	69667412	69678033	chr10:69667412-69678033	2	0	0.277539	0	NA
chr10	70216897	70219710	chr10:70216897-70219710	chr10	69679645	69682458	chr10:69679645-69682458	0	0	0	0	NA
chr10	70368900	70369235	chr10:70368900-70369235	chr10	69831648	69831983	chr10:69831648-69831983	0	0	0	0	NA
chr10	70379263	70379717	chr10:70379263-70379717	chr10	69842011	69842465	chr10:69842011-69842465	0	0	0	0	NA
chr10	70381603	70382036	chr10:70381603-70382036	chr10	69844351	69844784	chr10:69844351-69844784	0	0	0	0	NA
chr10	76651997	76652328	chr10:76651997-76652328	chr10	76114742	76115073	chr10:76114742-76115073	0	0	0	0	NA
chr10	82014473	82017230	chr10:82014473-82017230	chr10	81477218	81479975	chr10:81477218-81479975	7	0	0.971388	0	NA
chr10	82126676	82128287	chr10:82126676-82128287	chr10	81589421	81591032	chr10:81589421-81591032	0	4	0	0.409214	NA
chr10	82222160	82222756	chr10:82222160-82222756	chr10	81684905	81685501	chr10:81684905-81685501	0	3	0	0.30691	NA
chr10	83722862	83762761	chr10:83722862-83762761	chr10	83185607	83225506	chr10:83185607-83225506	28	0	3.88555	0	NA
chr10	83901846	83902128	chr10:83901846-83902128	chr10	83364591	83364873	chr10:83364591-83364873	0	0	0	0	NA
chr10	83936985	83937045	chr10:83936985-83937045	chr10	83399730	83399790	chr10:83399730-83399790	0	0	0	0	NA
chr10	84518046	84523270	chr10:84518046-84523270	chr10	83980791	83986015	chr10:83980791-83986015	4	0	0.555079	0	NA
chr10	84547417	84553338	chr10:84547417-84553338	chr10	84010162	84016083	chr10:84010162-84016083	0	2	0	0.204607	NA
chr10	94408891	94410732	chr10:94408891-94410732	chr10	93871636	93873477	chr10:93871636-93873477	0	0	0	0	NA
chr10	94476004	94477950	chr10:94476004-94477950	chr10	93938749	93940695	chr10:93938749-93940695	0	0	0	0	NA
chr10	94512662	94514731	chr10:94512662-94514731	chr10	93975407	93977476	chr10:93975407-93977476	0	0	0	0	NA
chr10	96266670	96292539	chr10:96266670-96292539	chr10	95729304	95755173	chr10:95729304-95755173	5	0	0.693849	0	NA
chr10	96310131	96362367	chr10:96310131-96362367	chr10	95772765	95825001	chr10:95772765-95825001	17	0	2.35909	0	NA
chr10	96634362	96634955	chr10:96634362-96634955	chr10	96096996	96097589	chr10:96096996-96097589	0	0	0	0	NA
chr10	96635425	96635989	chr10:96635425-96635989	chr10	96098059	96098623	chr10:96098059-96098623	2	0	0.277539	0	NA
chr10	96637912	96638375	chr10:96637912-96638375	chr10	96100546	96101009	chr10:96100546-96101009	0	0	0	0	NA
chr10	96641099	96641233	chr10:96641099-96641233	chr10	96103733	96103867	chr10:96103733-96103867	0	0	0	0	NA
chr10	97733888	97744837	chr10:97733888-97744837	chr10	97196522	97207471	chr10:97196522-97207471	2	0	0.277539	0	NA
chr10	99255893	99256535	chr10:99255893-99256535	chr10	98718527	98719169	chr10:98718527-98719169	0	0	0	0	NA
chr10	108417069	108451693	chr10:108417069-108451693	chr10	107854125	107888749	chr10:107854125-107888749	0	1	0	0.102303	NA
chr10	111312790	111314328	chr10:111312790-111314328	chr10	110749846	110751384	chr10:110749846-110751384	0	2	0	0.204607	NA
chr10	111543168	111543611	chr10:111543168-111543611	chr10	110980224	110980667	chr10:110980224-110980667	0	0	0	0	NA
chr10	115325834	115326154	chr10:115325834-115326154	chr10	114762890	114763210	chr10:114762890-114763210	0	0	0	0	NA
chr10	117590243	117595942	chr10:117590243-117595942	chr10	117027299	117032998	chr10:117027299-117032998	0	1	0	0.102303	NA
chr10	118990551	118993014	chr10:118990551-118993014	chr10	118427607	118430070	chr10:118427607-118430070	6	0	0.832618	0	NA
chr10	120523491	120542640	chr10:120523491-120542640	chr10	119960547	119979696	chr10:119960547-119979696	0	2	0	0.204607	NA
chr10	120621641	120639140	chr10:120621641-120639140	chr10	120058697	120076196	chr10:120058697-120076196	1	0	0.13877	0	NA
chr10	120899157	120901888	chr10:120899157-120901888	chr10	120336213	120338944	chr10:120336213-120338944	0	0	0	0	NA
chr10	120899241	120917415	chr10:120899241-120917415	chr10	120336297	120354471	chr10:120336297-120354471	6	0	0.832618	0	NA
chr10	126714005	126719394	chr10:126714005-126719394	chr10	126151061	126156450	chr10:126151061-126156450	0	0	0	0	NA
chr11	5477052	5477722	chr11:5477052-5477722	chr11	5377055	5377725	chr11:5377055-5377725	0	0	0	0	NA
chr11	6896677	6897667	chr11:6896677-6897667	chr11	6796680	6797670	chr11:6796680-6797670	2	0	0.277539	0	NA
chr11	18579850	18585701	chr11:18579850-18585701	chr11	18479853	18485704	chr11:18479853-18485704	0	0	0	0	NA
chr11	18853939	18860115	chr11:18853939-18860115	chr11	18753942	18760118	chr11:18753942-18760118	0	0	0	0	NA
chr11	20060513	20061090	chr11:20060513-20061090	chr11	19960516	19961093	chr11:19960516-19961093	0	2	0	0.204607	NA
chr11	20469532	20471455	chr11:20469532-20471455	chr11	20369535	20371458	chr11:20369535-20371458	0	2	0	0.204607	NA
chr11	22610173	22622022	chr11:22610173-22622022	chr11	22510176	22522025	chr11:22510176-22522025	4	0	0.555079	0	NA
chr11	30283951	30284192	chr11:30283951-30284192	chr11	30183951	30184192	chr11:30183951-30184192	0	0	0	0	NA
chr11	31694720	31695201	chr11:31694720-31695201	chr11	31594720	31595201	chr11:31594720-31595201	0	0	0	0	NA
chr11	31743115	31743595	chr11:31743115-31743595	chr11	31643115	31643595	chr11:31643115-31643595	0	0	0	0	NA
chr11	31747437	31747791	chr11:31747437-31747791	chr11	31647437	31647791	chr11:31647437-31647791	0	0	0	0	NA
chr11	31748454	31748952	chr11:31748454-31748952	chr11	31648454	31648952	chr11:31648454-31648952	0	0	0	0	NA
chr11	33542090	33544467	chr11:33542090-33544467	chr11	33442090	33444467	chr11:33442090-33444467	4	0	0.555079	0	NA
chr11	35996530	35996703	chr11:35996530-35996703	chr11	35810032	35810205	chr11:35810032-35810205	0	0	0	0	NA
chr11	51226036	51235467	chr11:51226036-51235467	chr11	51039538	51048969	chr11:51039538-51048969	13	0	1.80401	0	NA
chr11	53760681	53761142	chr11:53760681-53761142	chr11	53574183	53574644	chr11:53574183-53574644	2	0	0.277539	0	NA
chr11	59380072	59380330	chr11:59380072-59380330	chr11	59193574	59193832	chr11:59193574-59193832	0	0	0	0	NA
chr11	59393226	59393670	chr11:59393226-59393670	chr11	59206728	59207172	chr11:59206728-59207172	0	4	0	0.409214	NA
chr11	59403748	59404283	chr11:59403748-59404283	chr11	59217250	59217785	chr11:59217250-59217785	0	11	0	1.12534	NA
chr11	69380372	69380805	chr11:69380372-69380805	chr11	69193874	69194307	chr11:69193874-69194307	0	5	0	0.511517	NA
chr11	69381982	69382355	chr11:69381982-69382355	chr11	69195484	69195857	chr11:69195484-69195857	0	4	0	0.409214	NA
chr11	76614467	76622204	chr11:76614467-76622204	chr11	76427969	76435706	chr11:76427969-76435706	4	0	0.555079	0	NA
chr11	79716198	79717062	chr11:79716198-79717062	chr11	79529700	79530564	chr11:79529700-79530564	0	2	0	0.204607	NA
chr11	79718130	79718259	chr11:79718130-79718259	chr11	79531632	79531761	chr11:79531632-79531761	2	0	0.277539	0	NA
chr11	79718267	79718625	chr11:79718267-79718625	chr11	79531769	79532127	chr11:79531769-79532127	2	0	0.277539	0	NA
chr11	79737845	79738094	chr11:79737845-79738094	chr11	79551347	79551596	chr11:79551347-79551596	0	0	0	0	NA
chr11	79738359	79738719	chr11:79738359-79738719	chr11	79551861	79552221	chr11:79551861-79552221	0	0	0	0	NA
chr11	79738845	79739580	chr11:79738845-79739580	chr11	79552347	79553082	chr11:79552347-79553082	0	0	0	0	NA
chr11	82779601	82780894	chr11:82779601-82780894	chr11	82593103	82594396	chr11:82593103-82594396	4	0	0.555079	0	NA
chr11	95236170	95236604	chr11:95236170-95236604	chr11	95097484	95097918	chr11:95097484-95097918	0	0	0	0	NA
chr11	95236802	95237180	chr11:95236802-95237180	chr11	95098116	95098494	chr11:95098116-95098494	2	0	0.277539	0	NA
chr11	95252659	95252953	chr11:95252659-95252953	chr11	95113973	95114267	chr11:95113973-95114267	0	0	0	0	NA
chr11	95253240	95253702	chr11:95253240-95253702	chr11	95114554	95115016	chr11:95114554-95115016	0	0	0	0	NA
chr11	95622660	95629437	chr11:95622660-95629437	chr11	95483974	95490751	chr11:95483974-95490751	4	0	0.555079	0	NA
chr11	95795978	95796458	chr11:95795978-95796458	chr11	95657292	95657772	chr11:95657292-95657772	0	1	0	0.102303	NA
chr11	96312475	96313038	chr11:96312475-96313038	chr11	96173789	96174352	chr11:96173789-96174352	0	0	0	0	NA
chr11	96314451	96314715	chr11:96314451-96314715	chr11	96175765	96176029	chr11:96175765-96176029	0	0	0	0	NA
chr11	99187662	99201111	chr11:99187662-99201111	chr11	99048976	99062425	chr11:99048976-99062425	4	0	0.555079	0	NA
chr11	100109028	100112106	chr11:100109028-100112106	chr11	99970342	99973420	chr11:99970342-99973420	0	0	0	0	NA
chr11	102972075	102972467	chr11:102972075-102972467	chr11	102833389	102833781	chr11:102833389-102833781	0	0	0	0	NA
chr11	103325520	103325742	chr11:103325520-103325742	chr11	103186834	103187056	chr11:103186834-103187056	0	0	0	0	NA
chr11	104447309	104448727	chr11:104447309-104448727	chr11	104308623	104310041	chr11:104308623-104310041	0	4	0	0.409214	NA
chr11	114825008	114844676	chr11:114825008-114844676	chr11	114686322	114705990	chr11:114686322-114705990	13	0	1.80401	0	NA
chr11	120236445	120237267	chr11:120236445-120237267	chr11	120097759	120098581	chr11:120097759-120098581	0	6	0	0.613821	NA
chr12	3199328	3200827	chr12:3199328-3200827	chr12	3199328	3200827	chr12:3199328-3200827	0	0	0	0	NA
chr12	4572401	4576756	chr12:4572401-4576756	chr12	4579207	4583562	chr12:4579207-4583562	2	0	0.277539	0	NA
chr12	8394209	8400363	chr12:8394209-8400363	chr12	8401015	8407169	chr12:8401015-8407169	0	0	0	0	NA
chr12	8444986	8445481	chr12:8444986-8445481	chr12	8451792	8452287	chr12:8451792-8452287	0	0	0	0	NA
chr12	9110445	9121994	chr12:9110445-9121994	chr12	9117251	9128800	chr12:9117251-9128800	2	0	0.277539	0	NA
chr12	9565205	9570260	chr12:9565205-9570260	chr12	9572011	9577066	chr12:9572011-9577066	0	0	0	0	NA
chr12	10575036	10575427	chr12:10575036-10575427	chr12	10581842	10582233	chr12:10581842-10582233	0	0	0	0	NA
chr12	12909428	12913029	chr12:12909428-12913029	chr12	12916234	12919835	chr12:12916234-12919835	0	2	0	0.204607	NA
chr12	13102655	13115903	chr12:13102655-13115903	chr12	13109461	13122709	chr12:13109461-13122709	2	0	0.277539	0	NA
chr12	15729101	15791700	chr12:15729101-15791700	chr12	15735907	15798506	chr12:15735907-15798506	2	0	0.277539	0	NA
chr12	15767268	15770338	chr12:15767268-15770338	chr12	15774074	15777144	chr12:15774074-15777144	2	0	0.277539	0	NA
chr12	15996901	16015775	chr12:15996901-16015775	chr12	16003707	16022581	chr12:16003707-16022581	7	0	0.971388	0	NA
chr12	16440352	16440851	chr12:16440352-16440851	chr12	16447158	16447657	chr12:16447158-16447657	0	0	0	0	NA
chr12	16441149	16441683	chr12:16441149-16441683	chr12	16447955	16448489	chr12:16447955-16448489	0	0	0	0	NA
chr12	16831924	16832554	chr12:16831924-16832554	chr12	16838730	16839360	chr12:16838730-16839360	0	0	0	0	NA
chr12	16834114	16834762	chr12:16834114-16834762	chr12	16840920	16841568	chr12:16840920-16841568	2	0	0.277539	0	NA
chr12	16866605	16867066	chr12:16866605-16867066	chr12	16873411	16873872	chr12:16873411-16873872	2	0	0.277539	0	NA
chr12	16868128	16868366	chr12:16868128-16868366	chr12	16874934	16875172	chr12:16874934-16875172	0	0	0	0	NA
chr12	17432135	17432313	chr12:17432135-17432313	chr12	17438941	17439119	chr12:17438941-17439119	0	0	0	0	NA
chr12	18023795	18034819	chr12:18023795-18034819	chr12	18030601	18041625	chr12:18030601-18041625	0	6	0	0.613821	NA
chr12	21375530	21375862	chr12:21375530-21375862	chr12	21381391	21381723	chr12:21381391-21381723	0	0	0	0	NA
chr12	22580081	22580635	chr12:22580081-22580635	chr12	23420305	23420859	chr12:23420305-23420859	0	0	0	0	NA
chr12	25167607	25167816	chr12:25167607-25167816	chr12	25852472	25852681	chr12:25852472-25852681	4	0	0.555079	0	NA
chr12	44314579	44322532	chr12:44314579-44322532	chr12	45415566	45423519	chr12:45415566-45423519	0	11	0	1.12534	NA
chr12	44317020	44317750	chr12:44317020-44317750	chr12	45418007	45418737	chr12:45418007-45418737	0	3	0	0.30691	NA
chr12	52568648	52571023	chr12:52568648-52571023	chr12	53669635	53672010	chr12:53669635-53672010	0	2	0	0.204607	NA
chr12	52599984	52602625	chr12:52599984-52602625	chr12	53700971	53703612	chr12:53700971-53703612	0	0	0	0	NA
chr12	54170705	54175505	chr12:54170705-54175505	chr12	55271692	55276492	chr12:55271692-55276492	4	0	0.555079	0	NA
chr12	54300775	54317624	chr12:54300775-54317624	chr12	55401762	55418611	chr12:55401762-55418611	6	0	0.832618	0	NA
chr12	54316164	54317015	chr12:54316164-54317015	chr12	55417151	55418002	chr12:55417151-55418002	0	0	0	0	NA
chr12	55463869	55464323	chr12:55463869-55464323	chr12	56564856	56565310	chr12:56564856-56565310	0	0	0	0	NA
chr12	55506671	55512595	chr12:55506671-55512595	chr12	56607658	56613582	chr12:56607658-56613582	0	0	0	0	NA
chr12	69501826	69502415	chr12:69501826-69502415	chr12	70602813	70603402	chr12:70602813-70603402	0	0	0	0	NA
chr12	69511470	69512087	chr12:69511470-69512087	chr12	70612457	70613074	chr12:70612457-70613074	0	0	0	0	NA
chr12	69536989	69537327	chr12:69536989-69537327	chr12	70637976	70638314	chr12:70637976-70638314	0	0	0	0	NA
chr12	72688549	72698800	chr12:72688549-72698800	chr12	73789536	73799787	chr12:73789536-73799787	3	0	0.416309	0	NA
chr12	73782705	73792336	chr12:73782705-73792336	chr12	74883692	74893323	chr12:74883692-74893323	8	0	1.11016	0	NA
chr12	75658875	75659253	chr12:75658875-75659253	chr12	76759862	76760240	chr12:76759862-76760240	0	3	0	0.30691	NA
chr12	76449698	76450518	chr12:76449698-76450518	chr12	77550685	77551505	chr12:77550685-77551505	0	0	0	0	NA
chr12	81008325	81008707	chr12:81008325-81008707	chr12	82109312	82109694	chr12:82109312-82109694	0	8	0	0.818427	NA
chr12	81399420	81400115	chr12:81399420-81400115	chr12	82500407	82501102	chr12:82500407-82501102	0	8	0	0.818427	NA
chr12	83911351	83912647	chr12:83911351-83912647	chr12	85252301	85253597	chr12:85252301-85253597	0	2	0	0.204607	NA
chr12	86831094	86831781	chr12:86831094-86831781	chr12	88172044	88172731	chr12:88172044-88172731	0	4	0	0.409214	NA
chr12	86880446	86880609	chr12:86880446-86880609	chr12	88221396	88221559	chr12:88221396-88221559	0	2	0	0.204607	NA
chr12	86910242	86911590	chr12:86910242-86911590	chr12	88251192	88252540	chr12:88251192-88252540	3	0	0.416309	0	NA
chr12	88210107	88223399	chr12:88210107-88223399	chr12	89448551	89461843	chr12:89448551-89461843	0	6	0	0.613821	NA
chr12	104877233	104877550	chr12:104877233-104877550	chr12	106115443	106115760	chr12:106115443-106115760	0	0	0	0	NA
chr12	107806244	107807408	chr12:107806244-107807408	chr12	109044454	109045618	chr12:109044454-109045618	2	0	0.277539	0	NA
chr12	108036039	108036337	chr12:108036039-108036337	chr12	109274249	109274547	chr12:109274249-109274547	2	0	0.277539	0	NA
chr12	108381198	108381633	chr12:108381198-108381633	chr12	109619408	109619843	chr12:109619408-109619843	0	0	0	0	NA
chr12	108755591	108755906	chr12:108755591-108755906	chr12	109993801	109994116	chr12:109993801-109994116	0	0	0	0	NA
chr12	108756521	108756852	chr12:108756521-108756852	chr12	109994731	109995062	chr12:109994731-109995062	0	0	0	0	NA
chr12	108757343	108757975	chr12:108757343-108757975	chr12	109995553	109996185	chr12:109995553-109996185	0	0	0	0	NA
chr12	108764769	108765150	chr12:108764769-108765150	chr12	110002979	110003360	chr12:110002979-110003360	0	2	0	0.204607	NA
chr12	109414939	109415491	chr12:109414939-109415491	chr12	110653149	110653701	chr12:110653149-110653701	0	0	0	0	NA
chr12	109530892	109532903	chr12:109530892-109532903	chr12	110769102	110771113	chr12:110769102-110771113	4	0	0.555079	0	NA
chr12	109603940	109607485	chr12:109603940-109607485	chr12	110842150	110845695	chr12:110842150-110845695	2	0	0.277539	0	NA
chr12	109603945	109645384	chr12:109603945-109645384	chr12	110842155	110883594	chr12:110842155-110883594	6	0	0.832618	0	NA
chr12	109606811	109612660	chr12:109606811-109612660	chr12	110845021	110850870	chr12:110845021-110850870	4	0	0.555079	0	NA
chr12	109632694	109653418	chr12:109632694-109653418	chr12	110870904	110891628	chr12:110870904-110891628	2	0	0.277539	0	NA
chr12	109655886	109661307	chr12:109655886-109661307	chr12	110894096	110899517	chr12:110894096-110899517	0	0	0	0	NA
chr12	109671049	109675699	chr12:109671049-109675699	chr12	110909259	110913909	chr12:110909259-110913909	0	0	0	0	NA
chr12	109729765	109730841	chr12:109729765-109730841	chr12	110967975	110969051	chr12:110967975-110969051	0	0	0	0	NA
chr12	109734981	109749458	chr12:109734981-109749458	chr12	110973191	110987668	chr12:110973191-110987668	4	0	0.555079	0	NA
chr12	109841658	109842351	chr12:109841658-109842351	chr12	111079868	111080561	chr12:111079868-111080561	2	0	0.277539	0	NA
chr12	110083821	110085177	chr12:110083821-110085177	chr12	111322031	111323387	chr12:111322031-111323387	0	0	0	0	NA
chr12	110982369	110982752	chr12:110982369-110982752	chr12	112220579	112220962	chr12:112220579-112220962	0	0	0	0	NA
chr12	110985179	110985545	chr12:110985179-110985545	chr12	112223389	112223755	chr12:112223389-112223755	2	0	0.277539	0	NA
chr12	110985984	110987118	chr12:110985984-110987118	chr12	112224194	112225328	chr12:112224194-112225328	0	0	0	0	NA
chr12	112481581	112482049	chr12:112481581-112482049	chr12	113719792	113720260	chr12:113719792-113720260	2	0	0.277539	0	NA
chr12	114127319	114141163	chr12:114127319-114141163	chr12	115365530	115379374	chr12:115365530-115379374	0	0	0	0	NA
chr12	115612668	115617721	chr12:115612668-115617721	chr12	116850879	116855932	chr12:116850879-116855932	2	0	0.277539	0	NA
chr12	118586653	118612277	chr12:118586653-118612277	chr12	119825126	119850750	chr12:119825126-119850750	14	0	1.94278	0	NA
chr13	3498051	3501195	chr13:3498051-3501195	chr13	3497297	3500441	chr13:3497297-3500441	0	0	0	0	NA
chr13	5507455	5519754	chr13:5507455-5519754	chr13	5506701	5519000	chr13:5506701-5519000	2	0	0.277539	0	NA
chr13	9185953	9186532	chr13:9185953-9186532	chr13	9185199	9185778	chr13:9185199-9185778	0	0	0	0	NA
chr13	9819455	9824879	chr13:9819455-9824879	chr13	9818701	9824125	chr13:9818701-9824125	2	0	0.277539	0	NA
chr13	12823217	12826378	chr13:12823217-12826378	chr13	12915484	12918645	chr13:12915484-12918645	0	0	0	0	NA
chr13	19519811	19529085	chr13:19519811-19529085	chr13	19611680	19620954	chr13:19611680-19620954	4	0	0.555079	0	NA
chr13	19525490	19526010	chr13:19525490-19526010	chr13	19617359	19617879	chr13:19617359-19617879	0	0	0	0	NA
chr13	19526623	19526967	chr13:19526623-19526967	chr13	19618492	19618836	chr13:19618492-19618836	0	0	0	0	NA
chr13	21166059	21166518	chr13:21166059-21166518	chr13	21257928	21258387	chr13:21257928-21258387	0	0	0	0	NA
chr13	21169540	21169985	chr13:21169540-21169985	chr13	21261409	21261854	chr13:21261409-21261854	0	0	0	0	NA
chr13	21172438	21172613	chr13:21172438-21172613	chr13	21264307	21264482	chr13:21264307-21264482	0	2	0	0.204607	NA
chr13	21769125	21770476	chr13:21769125-21770476	chr13	21860994	21862345	chr13:21860994-21862345	0	0	0	0	NA
chr13	23396038	23396329	chr13:23396038-23396329	chr13	23487907	23488198	chr13:23487907-23488198	0	0	0	0	NA
chr13	23396388	23396757	chr13:23396388-23396757	chr13	23488257	23488626	chr13:23488257-23488626	0	0	0	0	NA
chr13	26699545	26718178	chr13:26699545-26718178	chr13	26791414	26810047	chr13:26791414-26810047	2	0	0.277539	0	NA
chr13	27032610	27032815	chr13:27032610-27032815	chr13	27124479	27124684	chr13:27124479-27124684	0	0	0	0	NA
chr13	27974711	27975310	chr13:27974711-27975310	chr13	28066580	28067179	chr13:28066580-28067179	0	0	0	0	NA
chr13	27975473	27975945	chr13:27975473-27975945	chr13	28067342	28067814	chr13:28067342-28067814	0	0	0	0	NA
chr13	28398202	28400776	chr13:28398202-28400776	chr13	28490071	28492645	chr13:28490071-28492645	0	0	0	0	NA
chr13	28445355	28447991	chr13:28445355-28447991	chr13	28537224	28539860	chr13:28537224-28539860	0	0	0	0	NA
chr13	28807102	28809845	chr13:28807102-28809845	chr13	28898971	28901714	chr13:28898971-28901714	0	0	0	0	NA
chr13	28827123	28827362	chr13:28827123-28827362	chr13	28918992	28919231	chr13:28918992-28919231	0	0	0	0	NA
chr13	28855166	28857297	chr13:28855166-28857297	chr13	28947035	28949166	chr13:28947035-28949166	0	0	0	0	NA
chr13	28860702	28861365	chr13:28860702-28861365	chr13	28952571	28953234	chr13:28952571-28953234	0	0	0	0	NA
chr13	28883250	28885367	chr13:28883250-28885367	chr13	28975119	28977236	chr13:28975119-28977236	0	0	0	0	NA
chr13	29014412	29028507	chr13:29014412-29028507	chr13	29106281	29120376	chr13:29106281-29120376	4	0	0.555079	0	NA
chr13	34148660	34149096	chr13:34148660-34149096	chr13	34240529	34240965	chr13:34240529-34240965	0	0	0	0	NA
chr13	34601536	34626118	chr13:34601536-34626118	chr13	34693405	34717987	chr13:34693405-34717987	0	4	0	0.409214	NA
chr13	34729896	34730361	chr13:34729896-34730361	chr13	34821765	34822230	chr13:34821765-34822230	0	0	0	0	NA
chr13	37541357	37548440	chr13:37541357-37548440	chr13	37633226	37640309	chr13:37633226-37640309	6	0	0.832618	0	NA
chr13	38665635	38676059	chr13:38665635-38676059	chr13	38757504	38767928	chr13:38757504-38767928	2	0	0.277539	0	NA
chr13	44121804	44129578	chr13:44121804-44129578	chr13	44217173	44224947	chr13:44217173-44224947	0	0	0	0	NA
chr13	44657044	44708197	chr13:44657044-44708197	chr13	44752413	44803566	chr13:44752413-44803566	15	0	2.08155	0	NA
chr13	49393484	49393953	chr13:49393484-49393953	chr13	49488853	49489322	chr13:49488853-49489322	0	2	0	0.204607	NA
chr13	51152767	51153264	chr13:51152767-51153264	chr13	51248136	51248633	chr13:51248136-51248633	0	0	0	0	NA
chr13	51160797	51161023	chr13:51160797-51161023	chr13	51256166	51256392	chr13:51256166-51256392	0	0	0	0	NA
chr13	52583176	52584939	chr13:52583176-52584939	chr13	52678545	52680308	chr13:52678545-52680308	0	12	0	1.22764	NA
chr13	54301846	54312061	chr13:54301846-54312061	chr13	54397215	54407430	chr13:54397215-54407430	12	0	1.66524	0	NA
chr13	56750044	56750435	chr13:56750044-56750435	chr13	56851405	56851796	chr13:56851405-56851796	2	0	0.277539	0	NA
chr13	59144257	59144584	chr13:59144257-59144584	chr13	59245618	59245945	chr13:59245618-59245945	0	0	0	0	NA
chr13	59868590	59888364	chr13:59868590-59888364	chr13	59969951	59989725	chr13:59969951-59989725	4	0	0.555079	0	NA
chr13	60407415	60433264	chr13:60407415-60433264	chr13	60508776	60534625	chr13:60508776-60534625	7	0	0.971388	0	NA
chr13	60422785	60427198	chr13:60422785-60427198	chr13	60524146	60528559	chr13:60524146-60528559	0	0	0	0	NA
chr13	62263001	62280415	chr13:62263001-62280415	chr13	62364361	62381775	chr13:62364361-62381775	4	0	0.555079	0	NA
chr13	62264947	62265534	chr13:62264947-62265534	chr13	62366307	62366894	chr13:62366307-62366894	0	0	0	0	NA
chr13	62274876	62275530	chr13:62274876-62275530	chr13	62376236	62376890	chr13:62376236-62376890	0	0	0	0	NA
chr13	62479466	62495065	chr13:62479466-62495065	chr13	62580826	62596425	chr13:62580826-62596425	4	0	0.555079	0	NA
chr13	63943069	63944060	chr13:63943069-63944060	chr13	64044377	64045368	chr13:64044377-64045368	0	0	0	0	NA
chr13	65239930	65240698	chr13:65239930-65240698	chr13	65341238	65342006	chr13:65341238-65342006	0	0	0	0	NA
chr13	65252957	65253703	chr13:65252957-65253703	chr13	65354265	65355011	chr13:65354265-65355011	0	4	0	0.409214	NA
chr13	65480540	65492864	chr13:65480540-65492864	chr13	65581476	65593800	chr13:65581476-65593800	14	0	1.94278	0	NA
chr13	65487773	65488364	chr13:65487773-65488364	chr13	65588709	65589300	chr13:65588709-65589300	0	0	0	0	NA
chr13	66787715	66801664	chr13:66787715-66801664	chr13	66888651	66902600	chr13:66888651-66902600	14	0	1.94278	0	NA
chr13	67111015	67116263	chr13:67111015-67116263	chr13	67211951	67217199	chr13:67211951-67217199	0	0	0	0	NA
chr13	70676716	70681966	chr13:70676716-70681966	chr13	70815594	70820844	chr13:70815594-70820844	0	2	0	0.204607	NA
chr13	70882948	70884503	chr13:70882948-70884503	chr13	71021826	71023381	chr13:71021826-71023381	0	0	0	0	NA
chr13	72620382	72623231	chr13:72620382-72623231	chr13	72757830	72760679	chr13:72757830-72760679	0	0	0	0	NA
chr13	72769431	72786342	chr13:72769431-72786342	chr13	72906879	72923790	chr13:72906879-72923790	10	0	1.3877	0	NA
chr13	74383699	74391223	chr13:74383699-74391223	chr13	74521147	74528671	chr13:74521147-74528671	0	20	0	2.04607	NA
chr13	75783767	75785576	chr13:75783767-75785576	chr13	75921215	75923024	chr13:75921215-75923024	0	2	0	0.204607	NA
chr13	78201984	78235225	chr13:78201984-78235225	chr13	78341245	78374486	chr13:78341245-78374486	4	0	0.555079	0	NA
chr13	78202604	78236564	chr13:78202604-78236564	chr13	78341865	78375825	chr13:78341865-78375825	4	0	0.555079	0	NA
chr13	78231218	78232143	chr13:78231218-78232143	chr13	78370479	78371404	chr13:78370479-78371404	0	0	0	0	NA
chr13	78427248	78442524	chr13:78427248-78442524	chr13	78566509	78581785	chr13:78566509-78581785	0	0	0	0	NA
chr13	78937605	78937946	chr13:78937605-78937946	chr13	79076866	79077207	chr13:79076866-79077207	0	0	0	0	NA
chr13	81634239	81644063	chr13:81634239-81644063	chr13	81773238	81783062	chr13:81773238-81783062	1	0	0.13877	0	NA
chr13	83728107	83738535	chr13:83728107-83738535	chr13	83867712	83878140	chr13:83867712-83878140	0	0	0	0	NA
chr13	93295873	93301422	chr13:93295873-93301422	chr13	94065828	94071377	chr13:94065828-94071377	0	2	0	0.204607	NA
chr13	93299914	93300052	chr13:93299914-93300052	chr13	94069869	94070007	chr13:94069869-94070007	0	0	0	0	NA
chr13	93413198	93414118	chr13:93413198-93414118	chr13	94183153	94184073	chr13:94183153-94184073	0	2	0	0.204607	NA
chr13	93415547	93415981	chr13:93415547-93415981	chr13	94185502	94185936	chr13:94185502-94185936	0	2	0	0.204607	NA
chr13	93416144	93416679	chr13:93416144-93416679	chr13	94186099	94186634	chr13:94186099-94186634	0	1	0	0.102303	NA
chr13	93419435	93419855	chr13:93419435-93419855	chr13	94189390	94189810	chr13:94189390-94189810	2	0	0.277539	0	NA
chr13	93420164	93420541	chr13:93420164-93420541	chr13	94190119	94190496	chr13:94190119-94190496	0	2	0	0.204607	NA
chr13	93423276	93423755	chr13:93423276-93423755	chr13	94193231	94193710	chr13:94193231-94193710	0	0	0	0	NA
chr13	93955331	93955601	chr13:93955331-93955601	chr13	94725286	94725556	chr13:94725286-94725556	0	0	0	0	NA
chr13	94869092	94869316	chr13:94869092-94869316	chr13	95639047	95639271	chr13:95639047-95639271	0	0	0	0	NA
chr13	96927973	96928445	chr13:96927973-96928445	chr13	97697928	97698400	chr13:97697928-97698400	4	0	0.555079	0	NA
chr13	96930373	96930921	chr13:96930373-96930921	chr13	97700328	97700876	chr13:97700328-97700876	0	0	0	0	NA
chr13	97292235	97296658	chr13:97292235-97296658	chr13	98062190	98066613	chr13:98062190-98066613	0	0	0	0	NA
chr13	97497095	97497649	chr13:97497095-97497649	chr13	98267050	98267604	chr13:98267050-98267604	0	0	0	0	NA
chr13	97500759	97502314	chr13:97500759-97502314	chr13	98270714	98272269	chr13:98270714-98272269	2	0	0.277539	0	NA
chr13	97511204	97515802	chr13:97511204-97515802	chr13	98281159	98285757	chr13:98281159-98285757	2	0	0.277539	0	NA
chr13	97709839	97711222	chr13:97709839-97711222	chr13	98479794	98481177	chr13:98479794-98481177	0	0	0	0	NA
chr13	97743914	97747411	chr13:97743914-97747411	chr13	98513869	98517366	chr13:98513869-98517366	2	0	0.277539	0	NA
chr13	97865841	97876662	chr13:97865841-97876662	chr13	98635796	98646617	chr13:98635796-98646617	0	0	0	0	NA
chr13	98695315	98702641	chr13:98695315-98702641	chr13	99465270	99472596	chr13:99465270-99472596	5	0	0.693849	0	NA
chr13	98695470	98695689	chr13:98695470-98695689	chr13	99465425	99465644	chr13:99465425-99465644	1	0	0.13877	0	NA
chr13	98699457	98699927	chr13:98699457-98699927	chr13	99469412	99469882	chr13:99469412-99469882	0	0	0	0	NA
chr13	98702178	98702336	chr13:98702178-98702336	chr13	99472133	99472291	chr13:99472133-99472291	0	0	0	0	NA
chr13	99100706	99107580	chr13:99100706-99107580	chr13	99870661	99877535	chr13:99870661-99877535	2	0	0.277539	0	NA
chr13	99120949	99122622	chr13:99120949-99122622	chr13	99890904	99892577	chr13:99890904-99892577	2	0	0.277539	0	NA
chr13	102331987	102332407	chr13:102331987-102332407	chr13	103101942	103102362	chr13:103101942-103102362	0	0	0	0	NA
chr13	103801717	103802169	chr13:103801717-103802169	chr13	104591797	104592249	chr13:104591797-104592249	0	0	0	0	NA
chr13	103802676	103803151	chr13:103802676-103803151	chr13	104592756	104593231	chr13:104592756-104593231	0	0	0	0	NA
chr13	104012693	104012880	chr13:104012693-104012880	chr13	104802773	104802960	chr13:104802773-104802960	0	0	0	0	NA
chr13	111419566	111419881	chr13:111419566-111419881	chr13	112209774	112210089	chr13:112209774-112210089	0	2	0	0.204607	NA
chr13	111547198	111566247	chr13:111547198-111566247	chr13	112337406	112356455	chr13:112337406-112356455	6	0	0.832618	0	NA
chr13	111927473	111943122	chr13:111927473-111943122	chr13	112717681	112733330	chr13:112717681-112733330	16	0	2.22032	0	NA
chr13	112414938	112417362	chr13:112414938-112417362	chr13	113205146	113207570	chr13:113205146-113207570	0	0	0	0	NA
chr13	112764848	112774457	chr13:112764848-112774457	chr13	113555056	113564665	chr13:113555056-113564665	4	0	0.555079	0	NA
chr13	113316248	113327897	chr13:113316248-113327897	chr13	114106456	114118105	chr13:114106456-114118105	7	0	0.971388	0	NA
chr13	113321054	113327749	chr13:113321054-113327749	chr13	114111262	114117957	chr13:114111262-114117957	4	0	0.555079	0	NA
chr13	113723952	113724557	chr13:113723952-113724557	chr13	114514160	114514765	chr13:114514160-114514765	0	2	0	0.204607	NA
chr14	7959920	7960053	chr14:7959920-7960053	chr14	8792434	8792567	chr14:8792434-8792567	0	0	0	0	NA
chr14	13855959	13914758	chr14:13855959-13914758	chr14	14688473	14747272	chr14:14688473-14747272	7	0	0.971388	0	NA
chr14	18462806	18478105	chr14:18462806-18478105	chr14	19295320	19310619	chr14:19295320-19310619	4	0	0.555079	0	NA
chr14	20643549	20644048	chr14:20643549-20644048	chr14	21462771	21463270	chr14:21462771-21463270	4	0	0.555079	0	NA
chr14	25103810	25104407	chr14:25103810-25104407	chr14	25923296	25923893	chr14:25923296-25923893	0	0	0	0	NA
chr14	25104554	25104886	chr14:25104554-25104886	chr14	25924040	25924372	chr14:25924040-25924372	0	0	0	0	NA
chr14	27117149	27117788	chr14:27117149-27117788	chr14	27930335	27930974	chr14:27930335-27930974	0	0	0	0	NA
chr14	27418392	27428841	chr14:27418392-27428841	chr14	28231578	28242027	chr14:28231578-28242027	6	0	0.832618	0	NA
chr14	29945157	29946483	chr14:29945157-29946483	chr14	30758343	30759669	chr14:30758343-30759669	0	2	0	0.204607	NA
chr14	42829293	42836542	chr14:42829293-42836542	chr14	43408100	43415349	chr14:43408100-43415349	1	0	0.13877	0	NA
chr14	43569041	43572064	chr14:43569041-43572064	chr14	44146706	44149729	chr14:44146706-44149729	2	0	0.277539	0	NA
chr14	43573384	43579259	chr14:43573384-43579259	chr14	44151049	44156924	chr14:44151049-44156924	0	3	0	0.30691	NA
chr14	43714973	43715349	chr14:43714973-43715349	chr14	44292638	44293014	chr14:44292638-44293014	0	2	0	0.204607	NA
chr14	54698363	54698833	chr14:54698363-54698833	chr14	55317200	55317670	chr14:55317200-55317670	1	0	0.13877	0	NA
chr14	54814546	54833920	chr14:54814546-54833920	chr14	55433383	55452757	chr14:55433383-55452757	2	0	0.277539	0	NA
chr14	55053869	55056375	chr14:55053869-55056375	chr14	55672706	55675212	chr14:55672706-55675212	17	0	2.35909	0	NA
chr14	55729192	55729633	chr14:55729192-55729633	chr14	56348029	56348470	chr14:56348029-56348470	0	0	0	0	NA
chr14	60702953	60706874	chr14:60702953-60706874	chr14	61321790	61325711	chr14:61321790-61325711	2	0	0.277539	0	NA
chr14	64116912	64117512	chr14:64116912-64117512	chr14	64735749	64736349	chr14:64735749-64736349	0	0	0	0	NA
chr14	64586747	64587069	chr14:64586747-64587069	chr14	65205584	65205906	chr14:65205584-65205906	0	0	0	0	NA
chr14	65166641	65196940	chr14:65166641-65196940	chr14	65785478	65815777	chr14:65785478-65815777	14	0	1.94278	0	NA
chr14	65166641	65196961	chr14:65166641-65196961	chr14	65785478	65815798	chr14:65785478-65815798	14	0	1.94278	0	NA
chr14	65256141	65261365	chr14:65256141-65261365	chr14	65874978	65880202	chr14:65874978-65880202	0	0	0	0	NA
chr14	65259169	65259793	chr14:65259169-65259793	chr14	65878006	65878630	chr14:65878006-65878630	0	0	0	0	NA
chr14	70083749	70084352	chr14:70083749-70084352	chr14	70483556	70484159	chr14:70483556-70484159	0	0	0	0	NA
chr14	72000850	72001080	chr14:72000850-72001080	chr14	72400657	72400887	chr14:72400657-72400887	0	0	0	0	NA
chr14	72037393	72037500	chr14:72037393-72037500	chr14	72437200	72437307	chr14:72437200-72437307	0	0	0	0	NA
chr14	75837344	75837657	chr14:75837344-75837657	chr14	76237151	76237464	chr14:76237151-76237464	0	0	0	0	NA
chr14	76642542	76642838	chr14:76642542-76642838	chr14	77042349	77042645	chr14:77042349-77042645	0	0	0	0	NA
chr14	76677568	76687103	chr14:76677568-76687103	chr14	77077375	77086910	chr14:77077375-77086910	8	0	1.11016	0	NA
chr14	76704964	76705585	chr14:76704964-76705585	chr14	77104771	77105392	chr14:77104771-77105392	0	0	0	0	NA
chr14	76858219	76878943	chr14:76858219-76878943	chr14	77258026	77278750	chr14:77258026-77278750	8	0	1.11016	0	NA
chr14	76861571	76875175	chr14:76861571-76875175	chr14	77261378	77274982	chr14:77261378-77274982	4	0	0.555079	0	NA
chr14	77823738	77825154	chr14:77823738-77825154	chr14	78223545	78224961	chr14:78223545-78224961	0	5	0	0.511517	NA
chr14	78557571	78563170	chr14:78557571-78563170	chr14	78957378	78962977	chr14:78957378-78962977	0	0	0	0	NA
chr14	78557571	78563707	chr14:78557571-78563707	chr14	78957378	78963514	chr14:78957378-78963514	0	0	0	0	NA
chr14	79325274	79325627	chr14:79325274-79325627	chr14	79725081	79725434	chr14:79725081-79725434	2	0	0.277539	0	NA
chr14	79327883	79328225	chr14:79327883-79328225	chr14	79727690	79728032	chr14:79727690-79728032	0	0	0	0	NA
chr14	79680254	79680790	chr14:79680254-79680790	chr14	80080061	80080597	chr14:80080061-80080597	0	0	0	0	NA
chr14	99257044	99257639	chr14:99257044-99257639	chr14	99656263	99656858	chr14:99656263-99656858	2	0	0.277539	0	NA
chr14	99329141	99329739	chr14:99329141-99329739	chr14	99728360	99728958	chr14:99728360-99728958	0	0	0	0	NA
chr14	99330737	99331364	chr14:99330737-99331364	chr14	99729956	99730583	chr14:99729956-99730583	0	0	0	0	NA
chr14	99335289	99335670	chr14:99335289-99335670	chr14	99734508	99734889	chr14:99734508-99734889	0	0	0	0	NA
chr14	99336128	99336480	chr14:99336128-99336480	chr14	99735347	99735699	chr14:99735347-99735699	0	0	0	0	NA
chr14	99352880	99353206	chr14:99352880-99353206	chr14	99752099	99752425	chr14:99752099-99752425	0	0	0	0	NA
chr14	99354101	99354350	chr14:99354101-99354350	chr14	99753320	99753569	chr14:99753320-99753569	0	0	0	0	NA
chr14	100459423	100479525	chr14:100459423-100479525	chr14	100858642	100878744	chr14:100858642-100878744	0	0	0	0	NA
chr14	105588189	105664260	chr14:105588189-105664260	chr14	105987406	106063477	chr14:105987406-106063477	10	0	1.3877	0	NA
chr14	105589476	105594928	chr14:105589476-105594928	chr14	105988693	105994145	chr14:105988693-105994145	2	0	0.277539	0	NA
chr14	105851605	105862626	chr14:105851605-105862626	chr14	106250822	106261843	chr14:106250822-106261843	0	0	0	0	NA
chr14	105853073	105862501	chr14:105853073-105862501	chr14	106252290	106261718	chr14:106252290-106261718	0	0	0	0	NA
chr14	121451730	121455756	chr14:121451730-121455756	chr14	121850952	121854978	chr14:121850952-121854978	0	0	0	0	NA
chr15	3280735	3301196	chr15:3280735-3301196	chr15	3230735	3251196	chr15:3230735-3251196	4	0	0.555079	0	NA
chr15	4020111	4026009	chr15:4020111-4026009	chr15	3970111	3976009	chr15:3970111-3976009	0	0	0	0	NA
chr15	6019455	6044540	chr15:6019455-6044540	chr15	5969455	5994540	chr15:5969455-5994540	2	0	0.277539	0	NA
chr15	6025554	6044636	chr15:6025554-6044636	chr15	5975554	5994636	chr15:5975554-5994636	2	0	0.277539	0	NA
chr15	6965911	6965980	chr15:6965911-6965980	chr15	6915911	6915980	chr15:6915911-6915980	0	0	0	0	NA
chr15	10767489	10769347	chr15:10767489-10769347	chr15	10697244	10699102	chr15:10697244-10699102	2	0	0.277539	0	NA
chr15	10788326	10790103	chr15:10788326-10790103	chr15	10718081	10719858	chr15:10718081-10719858	0	2	0	0.204607	NA
chr15	12192553	12193003	chr15:12192553-12193003	chr15	12122308	12122758	chr15:12122308-12122758	2	0	0.277539	0	NA
chr15	12196679	12196990	chr15:12196679-12196990	chr15	12126434	12126745	chr15:12126434-12126745	0	0	0	0	NA
chr15	32237762	32244662	chr15:32237762-32244662	chr15	32167517	32174417	chr15:32167517-32174417	0	0	0	0	NA
chr15	32237762	32244672	chr15:32237762-32244672	chr15	32167517	32174427	chr15:32167517-32174427	0	0	0	0	NA
chr15	34050887	34051380	chr15:34050887-34051380	chr15	33980642	33981135	chr15:33980642-33981135	0	0	0	0	NA
chr15	34053756	34055260	chr15:34053756-34055260	chr15	33983511	33985015	chr15:33983511-33985015	0	1	0	0.102303	NA
chr15	36370552	36380789	chr15:36370552-36380789	chr15	36300307	36310544	chr15:36300307-36310544	2	0	0.277539	0	NA
chr15	38709505	38709791	chr15:38709505-38709791	chr15	38639260	38639546	chr15:38639260-38639546	0	4	0	0.409214	NA
chr15	39966927	39967719	chr15:39966927-39967719	chr15	39798473	39799265	chr15:39798473-39799265	0	2	0	0.204607	NA
chr15	41654687	41668221	chr15:41654687-41668221	chr15	41486233	41499767	chr15:41486233-41499767	0	0	0	0	NA
chr15	43531501	43533217	chr15:43531501-43533217	chr15	43363047	43364763	chr15:43363047-43364763	0	4	0	0.409214	NA
chr15	58496149	58497888	chr15:58496149-58497888	chr15	58327704	58329443	chr15:58327704-58329443	0	0	0	0	NA
chr15	59150382	59150767	chr15:59150382-59150767	chr15	58981937	58982322	chr15:58981937-58982322	0	0	0	0	NA
chr15	59153454	59153874	chr15:59153454-59153874	chr15	58985009	58985429	chr15:58985009-58985429	0	0	0	0	NA
chr15	59153951	59155988	chr15:59153951-59155988	chr15	58985506	58987543	chr15:58985506-58987543	0	0	0	0	NA
chr15	59227896	59239021	chr15:59227896-59239021	chr15	59059451	59070576	chr15:59059451-59070576	13	0	1.80401	0	NA
chr15	59298537	59299684	chr15:59298537-59299684	chr15	59130092	59131239	chr15:59130092-59131239	4	0	0.555079	0	NA
chr15	59788417	59794959	chr15:59788417-59794959	chr15	59619972	59626514	chr15:59619972-59626514	0	0	0	0	NA
chr15	60135408	60141257	chr15:60135408-60141257	chr15	59966963	59972812	chr15:59966963-59972812	0	0	0	0	NA
chr15	60900097	60900524	chr15:60900097-60900524	chr15	60731652	60732079	chr15:60731652-60732079	2	0	0.277539	0	NA
chr15	60900655	60901267	chr15:60900655-60901267	chr15	60732210	60732822	chr15:60732210-60732822	2	0	0.277539	0	NA
chr15	61157869	61165735	chr15:61157869-61165735	chr15	60989424	60997290	chr15:60989424-60997290	0	0	0	0	NA
chr15	62332865	62333463	chr15:62332865-62333463	chr15	62164420	62165018	chr15:62164420-62165018	0	0	0	0	NA
chr15	66853204	66853929	chr15:66853204-66853929	chr15	66684766	66685491	chr15:66684766-66685491	0	0	0	0	NA
chr15	66854102	66854551	chr15:66854102-66854551	chr15	66685664	66686113	chr15:66685664-66686113	1	0	0.13877	0	NA
chr15	68339303	68339982	chr15:68339303-68339982	chr15	68170865	68171544	chr15:68170865-68171544	0	4	0	0.409214	NA
chr15	69094460	69101177	chr15:69094460-69101177	chr15	68924890	68931607	chr15:68924890-68931607	0	0	0	0	NA
chr15	73400763	73401389	chr15:73400763-73401389	chr15	73231193	73231819	chr15:73231193-73231819	0	0	0	0	NA
chr15	73511707	73511805	chr15:73511707-73511805	chr15	73342137	73342235	chr15:73342137-73342235	0	0	0	0	NA
chr15	74490355	74490954	chr15:74490355-74490954	chr15	74320785	74321384	chr15:74320785-74321384	0	0	0	0	NA
chr15	74492206	74492303	chr15:74492206-74492303	chr15	74322636	74322733	chr15:74322636-74322733	0	0	0	0	NA
chr15	74606026	74636311	chr15:74606026-74636311	chr15	74436456	74466741	chr15:74436456-74466741	11	0	1.52647	0	NA
chr15	74631559	74636298	chr15:74631559-74636298	chr15	74461989	74466728	chr15:74461989-74466728	3	0	0.416309	0	NA
chr15	74644275	74644340	chr15:74644275-74644340	chr15	74474705	74474770	chr15:74474705-74474770	0	0	0	0	NA
chr15	74645697	74645761	chr15:74645697-74645761	chr15	74476127	74476191	chr15:74476127-74476191	0	0	0	0	NA
chr15	74645804	74645866	chr15:74645804-74645866	chr15	74476234	74476296	chr15:74476234-74476296	0	0	0	0	NA
chr15	74646505	74646571	chr15:74646505-74646571	chr15	74476935	74477001	chr15:74476935-74477001	0	0	0	0	NA
chr15	74647215	74647306	chr15:74647215-74647306	chr15	74477645	74477736	chr15:74477645-74477736	0	0	0	0	NA
chr15	74647360	74647432	chr15:74647360-74647432	chr15	74477790	74477862	chr15:74477790-74477862	0	0	0	0	NA
chr15	74647514	74647599	chr15:74647514-74647599	chr15	74477944	74478029	chr15:74477944-74478029	0	0	0	0	NA
chr15	74648185	74648567	chr15:74648185-74648567	chr15	74478615	74478997	chr15:74478615-74478997	0	0	0	0	NA
chr15	74654270	74654849	chr15:74654270-74654849	chr15	74484700	74485279	chr15:74484700-74485279	0	0	0	0	NA
chr15	76363372	76363795	chr15:76363372-76363795	chr15	76193802	76194225	chr15:76193802-76194225	0	5	0	0.511517	NA
chr15	79446496	79456070	chr15:79446496-79456070	chr15	79276926	79286500	chr15:79276926-79286500	4	0	0.555079	0	NA
chr15	79453919	79454518	chr15:79453919-79454518	chr15	79284349	79284948	chr15:79284349-79284948	0	0	0	0	NA
chr15	79455865	79456221	chr15:79455865-79456221	chr15	79286295	79286651	chr15:79286295-79286651	0	0	0	0	NA
chr15	79843163	79846763	chr15:79843163-79846763	chr15	79673593	79677193	chr15:79673593-79677193	3	0	0.416309	0	NA
chr15	79964832	79966515	chr15:79964832-79966515	chr15	79795262	79796945	chr15:79795262-79796945	0	0	0	0	NA
chr15	82939488	82939866	chr15:82939488-82939866	chr15	82769918	82770296	chr15:82769918-82770296	0	0	0	0	NA
chr15	83260657	83263388	chr15:83260657-83263388	chr15	83091087	83093818	chr15:83091087-83093818	0	0	0	0	NA
chr15	85469348	85469736	chr15:85469348-85469736	chr15	85299778	85300166	chr15:85299778-85300166	0	6	0	0.613821	NA
chr15	85470508	85471092	chr15:85470508-85471092	chr15	85300938	85301522	chr15:85300938-85301522	0	6	0	0.613821	NA
chr15	85591296	85593617	chr15:85591296-85593617	chr15	85421726	85424047	chr15:85421726-85424047	4	0	0.555079	0	NA
chr15	86208445	86208803	chr15:86208445-86208803	chr15	86038875	86039233	chr15:86038875-86039233	1	0	0.13877	0	NA
chr15	86208989	86209457	chr15:86208989-86209457	chr15	86039419	86039887	chr15:86039419-86039887	3	0	0.416309	0	NA
chr15	86211316	86211727	chr15:86211316-86211727	chr15	86041746	86042157	chr15:86041746-86042157	0	0	0	0	NA
chr15	90244384	90257383	chr15:90244384-90257383	chr15	90074815	90087814	chr15:90074815-90087814	0	2	0	0.204607	NA
chr15	90326459	90354133	chr15:90326459-90354133	chr15	90156890	90184564	chr15:90156890-90184564	4	0	0.555079	0	NA
chr15	97153992	97169891	chr15:97153992-97169891	chr15	96984423	97000322	chr15:96984423-97000322	11	0	1.52647	0	NA
chr15	97665211	97673290	chr15:97665211-97673290	chr15	97495642	97503721	chr15:97495642-97503721	4	0	0.555079	0	NA
chr15	98095185	98095768	chr15:98095185-98095768	chr15	97925616	97926199	chr15:97925616-97926199	0	0	0	0	NA
chr15	101058393	101058700	chr15:101058393-101058700	chr15	100888824	100889131	chr15:100888824-100889131	0	0	0	0	NA
chr15	101074937	101075223	chr15:101074937-101075223	chr15	100905368	100905654	chr15:100905368-100905654	0	0	0	0	NA
chr15	101076516	101077317	chr15:101076516-101077317	chr15	100906947	100907748	chr15:100906947-100907748	0	0	0	0	NA
chr15	101077893	101078214	chr15:101077893-101078214	chr15	100908324	100908645	chr15:100908324-100908645	0	0	0	0	NA
chr15	101078295	101078481	chr15:101078295-101078481	chr15	100908726	100908912	chr15:100908726-100908912	0	0	0	0	NA
chr15	101258544	101259145	chr15:101258544-101259145	chr15	101088975	101089576	chr15:101088975-101089576	6	0	0.832618	0	NA
chr15	102269967	102275441	chr15:102269967-102275441	chr15	102100398	102105872	chr15:102100398-102105872	3	0	0.416309	0	NA
chr15	102270534	102274121	chr15:102270534-102274121	chr15	102100965	102104552	chr15:102100965-102104552	2	0	0.277539	0	NA
chr15	102944062	102947730	chr15:102944062-102947730	chr15	102774493	102778161	chr15:102774493-102778161	4	0	0.555079	0	NA
chr15	103090117	103103041	chr15:103090117-103103041	chr15	102920548	102933472	chr15:102920548-102933472	8	0	1.11016	0	NA
chr15	103096151	103102111	chr15:103096151-103102111	chr15	102926582	102932542	chr15:102926582-102932542	0	0	0	0	NA
chr15	103102284	103104602	chr15:103102284-103104602	chr15	102932715	102935033	chr15:102932715-102935033	0	2	0	0.204607	NA
chr15	103164568	103165516	chr15:103164568-103165516	chr15	102994999	102995947	chr15:102994999-102995947	4	0	0.555079	0	NA
chr16	4592920	4594230	chr16:4592920-4594230	chr16	4592920	4594230	chr16:4592920-4594230	0	0	0	0	NA
chr16	7947618	7947973	chr16:7947618-7947973	chr16	7947711	7948066	chr16:7947711-7948066	0	0	0	0	NA
chr16	8748890	8757072	chr16:8748890-8757072	chr16	8748983	8757165	chr16:8748983-8757165	5	0	0.693849	0	NA
chr16	9129446	9137805	chr16:9129446-9137805	chr16	9129539	9137898	chr16:9129539-9137898	2	0	0.277539	0	NA
chr16	9158770	9162334	chr16:9158770-9162334	chr16	9158863	9162427	chr16:9158863-9162427	4	0	0.555079	0	NA
chr16	9249596	9274920	chr16:9249596-9274920	chr16	9249689	9275013	chr16:9249689-9275013	3	0	0.416309	0	NA
chr16	11031956	11036578	chr16:11031956-11036578	chr16	11032049	11036671	chr16:11032049-11036671	4	0	0.555079	0	NA
chr16	13468861	13474301	chr16:13468861-13474301	chr16	13468954	13474394	chr16:13468954-13474394	0	0	0	0	NA
chr16	13514131	13515977	chr16:13514131-13515977	chr16	13514224	13516070	chr16:13514224-13516070	0	0	0	0	NA
chr16	13754564	13756554	chr16:13754564-13756554	chr16	13754657	13756647	chr16:13754657-13756647	0	0	0	0	NA
chr16	21305628	21306034	chr16:21305628-21306034	chr16	21305701	21306107	chr16:21305701-21306107	0	0	0	0	NA
chr16	21307797	21308120	chr16:21307797-21308120	chr16	21307870	21308193	chr16:21307870-21308193	3	0	0.416309	0	NA
chr16	22055719	22056067	chr16:22055719-22056067	chr16	22055792	22056140	chr16:22055792-22056140	0	0	0	0	NA
chr16	22718272	22725521	chr16:22718272-22725521	chr16	22718345	22725594	chr16:22718345-22725594	0	0	0	0	NA
chr16	23534591	23535099	chr16:23534591-23535099	chr16	23534664	23535172	chr16:23534664-23535172	0	0	0	0	NA
chr16	23989075	23992453	chr16:23989075-23992453	chr16	23989161	23992539	chr16:23989161-23992539	1	0	0.13877	0	NA
chr16	23991952	24000951	chr16:23991952-24000951	chr16	23992038	24001037	chr16:23992038-24001037	0	0	0	0	NA
chr16	25059639	25069058	chr16:25059639-25069058	chr16	25059725	25069144	chr16:25059725-25069144	0	4	0	0.409214	NA
chr16	25516952	25531276	chr16:25516952-25531276	chr16	25517038	25531362	chr16:25517038-25531362	0	0	0	0	NA
chr16	25523695	25524193	chr16:25523695-25524193	chr16	25523781	25524279	chr16:25523781-25524279	0	0	0	0	NA
chr16	29711288	29711949	chr16:29711288-29711949	chr16	29711374	29712035	chr16:29711374-29712035	0	0	0	0	NA
chr16	29804779	29815528	chr16:29804779-29815528	chr16	29804865	29815614	chr16:29804865-29815614	9	0	1.24893	0	NA
chr16	30195071	30200299	chr16:30195071-30200299	chr16	30195157	30200385	chr16:30195157-30200385	8	0	1.11016	0	NA
chr16	30939906	30940107	chr16:30939906-30940107	chr16	30939992	30940193	chr16:30939992-30940193	2	0	0.277539	0	NA
chr16	31607778	31608640	chr16:31607778-31608640	chr16	31607864	31608726	chr16:31607864-31608726	0	0	0	0	NA
chr16	34559538	34560376	chr16:34559538-34560376	chr16	34559624	34560462	chr16:34559624-34560462	0	0	0	0	NA
chr16	39983919	40081443	chr16:39983919-40081443	chr16	39984032	40081556	chr16:39984032-40081556	17	0	2.35909	0	NA
chr16	40069991	40073157	chr16:40069991-40073157	chr16	40070104	40073270	chr16:40070104-40073270	0	0	0	0	NA
chr16	40095914	40097129	chr16:40095914-40097129	chr16	40096027	40097242	chr16:40096027-40097242	0	0	0	0	NA
chr16	40267274	40268068	chr16:40267274-40268068	chr16	40267387	40268181	chr16:40267387-40268181	0	0	0	0	NA
chr16	40282985	40284709	chr16:40282985-40284709	chr16	40283098	40284822	chr16:40283098-40284822	0	0	0	0	NA
chr16	40306958	40308605	chr16:40306958-40308605	chr16	40307071	40308718	chr16:40307071-40308718	0	0	0	0	NA
chr16	40307819	40318743	chr16:40307819-40318743	chr16	40307932	40318856	chr16:40307932-40318856	0	0	0	0	NA
chr16	40311926	40315451	chr16:40311926-40315451	chr16	40312039	40315564	chr16:40312039-40315564	0	0	0	0	NA
chr16	40463747	40464368	chr16:40463747-40464368	chr16	40463860	40464481	chr16:40463860-40464481	2	0	0.277539	0	NA
chr16	40464775	40465291	chr16:40464775-40465291	chr16	40464888	40465404	chr16:40464888-40465404	0	0	0	0	NA
chr16	40467706	40468361	chr16:40467706-40468361	chr16	40467819	40468474	chr16:40467819-40468474	0	0	0	0	NA
chr16	40469466	40469646	chr16:40469466-40469646	chr16	40469579	40469759	chr16:40469579-40469759	0	0	0	0	NA
chr16	40470182	40470822	chr16:40470182-40470822	chr16	40470295	40470935	chr16:40470295-40470935	0	0	0	0	NA
chr16	40471716	40472368	chr16:40471716-40472368	chr16	40471829	40472481	chr16:40471829-40472481	0	0	0	0	NA
chr16	40552004	40552629	chr16:40552004-40552629	chr16	40552117	40552742	chr16:40552117-40552742	0	0	0	0	NA
chr16	40592025	40594171	chr16:40592025-40594171	chr16	40592138	40594284	chr16:40592138-40594284	3	0	0.416309	0	NA
chr16	40651537	40653201	chr16:40651537-40653201	chr16	40651650	40653314	chr16:40651650-40653314	0	0	0	0	NA
chr16	40657885	40658343	chr16:40657885-40658343	chr16	40657998	40658456	chr16:40657998-40658456	0	0	0	0	NA
chr16	43623063	43623956	chr16:43623063-43623956	chr16	43623176	43624069	chr16:43623176-43624069	0	0	0	0	NA
chr16	43635618	43638991	chr16:43635618-43638991	chr16	43635731	43639104	chr16:43635731-43639104	4	0	0.555079	0	NA
chr16	45014694	45029362	chr16:45014694-45029362	chr16	45014807	45029475	chr16:45014807-45029475	3	0	0.416309	0	NA
chr16	46384862	46391218	chr16:46384862-46391218	chr16	46384975	46391331	chr16:46384975-46391331	4	0	0.555079	0	NA
chr16	50752340	50753476	chr16:50752340-50753476	chr16	50752453	50753589	chr16:50752453-50753589	0	0	0	0	NA
chr16	64762138	64762543	chr16:64762138-64762543	chr16	64761964	64762369	chr16:64761964-64762369	0	2	0	0.204607	NA
chr16	64765572	64766058	chr16:64765572-64766058	chr16	64765398	64765884	chr16:64765398-64765884	0	0	0	0	NA
chr16	77670355	77691397	chr16:77670355-77691397	chr16	77670600	77691642	chr16:77670600-77691642	0	0	0	0	NA
chr16	77682559	77708208	chr16:77682559-77708208	chr16	77682804	77708453	chr16:77682804-77708453	0	0	0	0	NA
chr16	84706958	84707503	chr16:84706958-84707503	chr16	84707203	84707748	chr16:84707203-84707748	0	0	0	0	NA
chr16	84707761	84708430	chr16:84707761-84708430	chr16	84708006	84708675	chr16:84708006-84708675	0	0	0	0	NA
chr16	84708451	84708561	chr16:84708451-84708561	chr16	84708696	84708806	chr16:84708696-84708806	0	0	0	0	NA
chr16	91187744	91188171	chr16:91187744-91188171	chr16	91187989	91188416	chr16:91187989-91188416	0	0	0	0	NA
chr16	91198332	91198904	chr16:91198332-91198904	chr16	91198577	91199149	chr16:91198577-91199149	0	0	0	0	NA
chr16	94553489	94554027	chr16:94553489-94554027	chr16	94775096	94775634	chr16:94775096-94775634	0	0	0	0	NA
chr17	3346622	3347209	chr17:3346622-3347209	chr17	3346622	3347209	chr17:3346622-3347209	0	0	0	0	NA
chr17	6324861	6326762	chr17:6324861-6326762	chr17	6324861	6326762	chr17:6324861-6326762	2	0	0.277539	0	NA
chr17	7645328	7660238	chr17:7645328-7660238	chr17	7838193	7853103	chr17:7838193-7853103	0	0	0	0	NA
chr17	7832222	7833362	chr17:7832222-7833362	chr17	8025087	8026227	chr17:8025087-8026227	0	0	0	0	NA
chr17	9750751	9775088	chr17:9750751-9775088	chr17	9943616	9967953	chr17:9943616-9967953	8	0	1.11016	0	NA
chr17	9864419	9882149	chr17:9864419-9882149	chr17	10057284	10075014	chr17:10057284-10075014	6	0	0.832618	0	NA
chr17	12748296	12751993	chr17:12748296-12751993	chr17	12941162	12944859	chr17:12941162-12944859	0	0	0	0	NA
chr17	12772984	12775653	chr17:12772984-12775653	chr17	12965850	12968519	chr17:12965850-12968519	0	0	0	0	NA
chr17	13675662	13683497	chr17:13675662-13683497	chr17	13812667	13820504	chr17:13812667-13820504	0	0	0	0	NA
chr17	14183458	14183968	chr17:14183458-14183968	chr17	14320465	14320975	chr17:14320465-14320975	0	0	0	0	NA
chr17	14546405	14561469	chr17:14546405-14561469	chr17	14683412	14698476	chr17:14683412-14698476	2	0	0.277539	0	NA
chr17	15088883	15089802	chr17:15088883-15089802	chr17	15225847	15226766	chr17:15225847-15226766	2	0	0.277539	0	NA
chr17	15220413	15248737	chr17:15220413-15248737	chr17	15357377	15385701	chr17:15357377-15385701	15	0	2.08155	0	NA
chr17	15231583	15240783	chr17:15231583-15240783	chr17	15368547	15377747	chr17:15368547-15377747	2	0	0.277539	0	NA
chr17	17206028	17206393	chr17:17206028-17206393	chr17	17342992	17343357	chr17:17342992-17343357	0	4	0	0.409214	NA
chr17	17355437	17370561	chr17:17355437-17370561	chr17	17492401	17507525	chr17:17492401-17507525	6	0	0.832618	0	NA
chr17	17491883	17504057	chr17:17491883-17504057	chr17	17628847	17641021	chr17:17628847-17641021	0	3	0	0.30691	NA
chr17	21041356	21045151	chr17:21041356-21045151	chr17	21178320	21182115	chr17:21178320-21182115	4	0	0.555079	0	NA
chr17	21908036	21909919	chr17:21908036-21909919	chr17	22045003	22046886	chr17:22045003-22046886	4	0	0.555079	0	NA
chr17	22678776	22691625	chr17:22678776-22691625	chr17	22815743	22828592	chr17:22815743-22828592	0	0	0	0	NA
chr17	24015259	24032903	chr17:24015259-24032903	chr17	24152226	24169870	chr17:24152226-24169870	0	2	0	0.204607	NA
chr17	24020921	24021137	chr17:24020921-24021137	chr17	24157888	24158104	chr17:24157888-24158104	0	0	0	0	NA
chr17	26476960	26477332	chr17:26476960-26477332	chr17	26613905	26614277	chr17:26613905-26614277	0	0	0	0	NA
chr17	26532643	26532962	chr17:26532643-26532962	chr17	26669588	26669907	chr17:26669588-26669907	2	0	0.277539	0	NA
chr17	27308316	27318696	chr17:27308316-27318696	chr17	27445261	27455641	chr17:27445261-27455641	8	0	1.11016	0	NA
chr17	27569199	27569863	chr17:27569199-27569863	chr17	27706144	27706808	chr17:27706144-27706808	0	2	0	0.204607	NA
chr17	29241934	29242644	chr17:29241934-29242644	chr17	29378879	29379589	chr17:29378879-29379589	4	0	0.555079	0	NA
chr17	29243482	29243882	chr17:29243482-29243882	chr17	29380427	29380827	chr17:29380427-29380827	0	0	0	0	NA
chr17	29246866	29247260	chr17:29246866-29247260	chr17	29383811	29384205	chr17:29383811-29384205	2	0	0.277539	0	NA
chr17	31938364	31938847	chr17:31938364-31938847	chr17	32075309	32075792	chr17:32075309-32075792	0	0	0	0	NA
chr17	31939125	31939645	chr17:31939125-31939645	chr17	32076070	32076590	chr17:32076070-32076590	2	0	0.277539	0	NA
chr17	44366568	44367903	chr17:44366568-44367903	chr17	44503517	44504852	chr17:44503517-44504852	0	0	0	0	NA
chr17	45921866	45922355	chr17:45921866-45922355	chr17	46058815	46059304	chr17:46058815-46059304	0	0	0	0	NA
chr17	46067335	46084266	chr17:46067335-46084266	chr17	46204284	46221215	chr17:46204284-46221215	15	0	2.08155	0	NA
chr17	56551673	56554387	chr17:56551673-56554387	chr17	56691096	56693810	chr17:56691096-56693810	0	4	0	0.409214	NA
chr17	63632552	63666276	chr17:63632552-63666276	chr17	63981901	64015625	chr17:63981901-64015625	6	0	0.832618	0	NA
chr17	63672752	63714176	chr17:63672752-63714176	chr17	64022101	64063525	chr17:64022101-64063525	4	0	0.555079	0	NA
chr17	63714014	63716718	chr17:63714014-63716718	chr17	64063363	64066067	chr17:64063363-64066067	2	0	0.277539	0	NA
chr17	72986515	72986976	chr17:72986515-72986976	chr17	73335855	73336316	chr17:73335855-73336316	0	0	0	0	NA
chr17	79733874	79745077	chr17:79733874-79745077	chr17	80133214	80144417	chr17:80133214-80144417	4	0	0.555079	0	NA
chr17	83959868	83960930	chr17:83959868-83960930	chr17	84359208	84360270	chr17:84359208-84360270	0	0	0	0	NA
chr17	83998552	84013408	chr17:83998552-84013408	chr17	84397892	84412748	chr17:84397892-84412748	12	0	1.66524	0	NA
chr17	84495911	84509110	chr17:84495911-84509110	chr17	84895251	84908450	chr17:84895251-84908450	0	0	0	0	NA
chr17	85692983	85693783	chr17:85692983-85693783	chr17	86092323	86093123	chr17:86092323-86093123	0	0	0	0	NA
chr17	85820168	85820772	chr17:85820168-85820772	chr17	86219508	86220112	chr17:86219508-86220112	0	0	0	0	NA
chr17	87084475	87093699	chr17:87084475-87093699	chr17	87483815	87493039	chr17:87483815-87493039	1	0	0.13877	0	NA
chr17	87826037	87839416	chr17:87826037-87839416	chr17	88225377	88238756	chr17:88225377-88238756	11	0	1.52647	0	NA
chr18	4415236	4415997	chr18:4415236-4415997	chr18	4415234	4415995	chr18:4415234-4415995	0	2	0	0.204607	NA
chr18	4420144	4420622	chr18:4420144-4420622	chr18	4420142	4420620	chr18:4420142-4420620	0	8	0	0.818427	NA
chr18	5162839	5165731	chr18:5162839-5165731	chr18	5162837	5165729	chr18:5162837-5165729	4	0	0.555079	0	NA
chr18	5808028	5818627	chr18:5808028-5818627	chr18	5808026	5818625	chr18:5808026-5818625	4	0	0.555079	0	NA
chr18	5813294	5813710	chr18:5813294-5813710	chr18	5813292	5813708	chr18:5813292-5813708	4	0	0.555079	0	NA
chr18	5951956	5952388	chr18:5951956-5952388	chr18	5951954	5952386	chr18:5951954-5952386	0	0	0	0	NA
chr18	6014255	6015021	chr18:6014255-6015021	chr18	6014253	6015019	chr18:6014253-6015019	0	0	0	0	NA
chr18	12949247	12949335	chr18:12949247-12949335	chr18	13107756	13107844	chr18:13107756-13107844	0	0	0	0	NA
chr18	24080525	24088397	chr18:24080525-24088397	chr18	24239026	24246898	chr18:24239026-24246898	2	0	0.277539	0	NA
chr18	25467923	25468331	chr18:25467923-25468331	chr18	25626424	25626832	chr18:25626424-25626832	0	0	0	0	NA
chr18	25472527	25473070	chr18:25472527-25473070	chr18	25631028	25631571	chr18:25631028-25631571	0	0	0	0	NA
chr18	35045297	35056996	chr18:35045297-35056996	chr18	35204951	35216650	chr18:35204951-35216650	0	0	0	0	NA
chr18	35811119	35811795	chr18:35811119-35811795	chr18	35970773	35971449	chr18:35970773-35971449	0	7	0	0.716124	NA
chr18	35813588	35813978	chr18:35813588-35813978	chr18	35973242	35973632	chr18:35973242-35973632	0	4	0	0.409214	NA
chr18	35826346	35826722	chr18:35826346-35826722	chr18	35986000	35986376	chr18:35986000-35986376	0	2	0	0.204607	NA
chr18	35913132	35916772	chr18:35913132-35916772	chr18	36072786	36076426	chr18:36072786-36076426	2	0	0.277539	0	NA
chr18	36310272	36310853	chr18:36310272-36310853	chr18	36469926	36470507	chr18:36469926-36470507	1	0	0.13877	0	NA
chr18	36312717	36313005	chr18:36312717-36313005	chr18	36472371	36472659	chr18:36472371-36472659	2	0	0.277539	0	NA
chr18	36320906	36321492	chr18:36320906-36321492	chr18	36480560	36481146	chr18:36480560-36481146	0	0	0	0	NA
chr18	36321584	36322165	chr18:36321584-36322165	chr18	36481238	36481819	chr18:36481238-36481819	0	4	0	0.409214	NA
chr18	38142870	38143102	chr18:38142870-38143102	chr18	38302524	38302756	chr18:38302524-38302756	0	0	0	0	NA
chr18	38318281	38318791	chr18:38318281-38318791	chr18	38477935	38478445	chr18:38477935-38478445	0	2	0	0.204607	NA
chr18	38383177	38385066	chr18:38383177-38385066	chr18	38542831	38544720	chr18:38542831-38544720	0	0	0	0	NA
chr18	38579223	38579670	chr18:38579223-38579670	chr18	38738877	38739324	chr18:38738877-38739324	0	0	0	0	NA
chr18	46492291	46493009	chr18:46492291-46493009	chr18	46651945	46652663	chr18:46651945-46652663	0	0	0	0	NA
chr18	46795000	46796017	chr18:46795000-46796017	chr18	46954654	46955671	chr18:46954654-46955671	0	4	0	0.409214	NA
chr18	46802207	46802718	chr18:46802207-46802718	chr18	46961861	46962372	chr18:46961861-46962372	0	2	0	0.204607	NA
chr18	46803023	46803170	chr18:46803023-46803170	chr18	46962677	46962824	chr18:46962677-46962824	0	0	0	0	NA
chr18	47094499	47095190	chr18:47094499-47095190	chr18	47254153	47254844	chr18:47254153-47254844	0	0	0	0	NA
chr18	47154189	47156186	chr18:47154189-47156186	chr18	47313843	47315840	chr18:47313843-47315840	2	0	0.277539	0	NA
chr18	47167647	47174165	chr18:47167647-47174165	chr18	47327301	47333819	chr18:47327301-47333819	0	0	0	0	NA
chr18	47169589	47169785	chr18:47169589-47169785	chr18	47329243	47329439	chr18:47329243-47329439	0	0	0	0	NA
chr18	47191726	47192207	chr18:47191726-47192207	chr18	47351380	47351861	chr18:47351380-47351861	0	0	0	0	NA
chr18	47192375	47193027	chr18:47192375-47193027	chr18	47352029	47352681	chr18:47352029-47352681	2	0	0.277539	0	NA
chr18	47530520	47537769	chr18:47530520-47537769	chr18	47690174	47697423	chr18:47690174-47697423	0	0	0	0	NA
chr18	49485331	49485758	chr18:49485331-49485758	chr18	49644985	49645412	chr18:49644985-49645412	0	0	0	0	NA
chr18	53962632	53963263	chr18:53962632-53963263	chr18	54122286	54122917	chr18:54122286-54122917	0	4	0	0.409214	NA
chr18	54880666	54881054	chr18:54880666-54881054	chr18	55040320	55040708	chr18:55040320-55040708	0	0	0	0	NA
chr18	56133160	56135355	chr18:56133160-56135355	chr18	56292814	56295009	chr18:56292814-56295009	0	0	0	0	NA
chr18	56942237	56942887	chr18:56942237-56942887	chr18	57101891	57102541	chr18:57101891-57102541	0	0	0	0	NA
chr18	56945065	56945701	chr18:56945065-56945701	chr18	57104719	57105355	chr18:57104719-57105355	0	2	0	0.204607	NA
chr18	60652774	60660121	chr18:60652774-60660121	chr18	60812428	60819775	chr18:60812428-60819775	0	4	0	0.409214	NA
chr18	61621757	61629031	chr18:61621757-61629031	chr18	61781411	61788685	chr18:61781411-61788685	0	2	0	0.204607	NA
chr18	61623895	61624281	chr18:61623895-61624281	chr18	61783549	61783935	chr18:61783549-61783935	0	0	0	0	NA
chr18	61625147	61625516	chr18:61625147-61625516	chr18	61784801	61785170	chr18:61784801-61785170	0	0	0	0	NA
chr18	61628495	61628653	chr18:61628495-61628653	chr18	61788149	61788307	chr18:61788149-61788307	0	0	0	0	NA
chr18	61649625	61665537	chr18:61649625-61665537	chr18	61809279	61825191	chr18:61809279-61825191	15	0	2.08155	0	NA
chr18	63062901	63063715	chr18:63062901-63063715	chr18	63222555	63223369	chr18:63222555-63223369	2	0	0.277539	0	NA
chr18	63066982	63067457	chr18:63066982-63067457	chr18	63226636	63227111	chr18:63226636-63227111	0	0	0	0	NA
chr18	63203735	63205780	chr18:63203735-63205780	chr18	63363389	63365434	chr18:63363389-63365434	0	0	0	0	NA
chr18	63303703	63304037	chr18:63303703-63304037	chr18	63463357	63463691	chr18:63463357-63463691	0	0	0	0	NA
chr18	63320688	63321245	chr18:63320688-63321245	chr18	63480342	63480899	chr18:63480342-63480899	0	0	0	0	NA
chr18	63322933	63323423	chr18:63322933-63323423	chr18	63482587	63483077	chr18:63482587-63483077	0	0	0	0	NA
chr18	63364534	63364928	chr18:63364534-63364928	chr18	63524188	63524582	chr18:63524188-63524582	0	0	0	0	NA
chr18	63366254	63366850	chr18:63366254-63366850	chr18	63525908	63526504	chr18:63525908-63526504	0	0	0	0	NA
chr18	65579151	65580147	chr18:65579151-65580147	chr18	65738805	65739801	chr18:65738805-65739801	0	0	0	0	NA
chr18	69016151	69018940	chr18:69016151-69018940	chr18	69175805	69178594	chr18:69175805-69178594	0	2	0	0.204607	NA
chr18	69763757	69805706	chr18:69763757-69805706	chr18	69923411	69965360	chr18:69923411-69965360	2	0	0.277539	0	NA
chr18	69797767	69798122	chr18:69797767-69798122	chr18	69957421	69957776	chr18:69957421-69957776	0	0	0	0	NA
chr18	69798468	69798833	chr18:69798468-69798833	chr18	69958122	69958487	chr18:69958122-69958487	0	0	0	0	NA
chr18	70240429	70244582	chr18:70240429-70244582	chr18	70400083	70404236	chr18:70400083-70404236	0	0	0	0	NA
chr18	73704259	73705011	chr18:73704259-73705011	chr18	73863913	73864665	chr18:73863913-73864665	0	0	0	0	NA
chr18	74972764	74981547	chr18:74972764-74981547	chr18	75132418	75141201	chr18:75132418-75141201	2	0	0.277539	0	NA
chr18	75288660	75297329	chr18:75288660-75297329	chr18	75448314	75456983	chr18:75448314-75456983	14	0	1.94278	0	NA
chr18	75341439	75341676	chr18:75341439-75341676	chr18	75501093	75501330	chr18:75501093-75501330	0	0	0	0	NA
chr18	77566955	77572479	chr18:77566955-77572479	chr18	77805694	77811218	chr18:77805694-77811218	4	0	0.555079	0	NA
chr18	77733639	77742704	chr18:77733639-77742704	chr18	77972378	77981443	chr18:77972378-77981443	4	0	0.555079	0	NA
chr18	82765027	82765610	chr18:82765027-82765610	chr18	82934419	82935002	chr18:82934419-82935002	0	0	0	0	NA
chr18	83361233	83365094	chr18:83361233-83365094	chr18	83530625	83534486	chr18:83530625-83534486	0	2	0	0.204607	NA
chr18	84128027	84128353	chr18:84128027-84128353	chr18	84297419	84297745	chr18:84297419-84297745	0	0	0	0	NA
chr18	84133900	84134498	chr18:84133900-84134498	chr18	84303292	84303890	chr18:84303292-84303890	0	0	0	0	NA
chr18	84136609	84136924	chr18:84136609-84136924	chr18	84306001	84306316	chr18:84306001-84306316	0	0	0	0	NA
chr18	84567667	84568252	chr18:84567667-84568252	chr18	84737059	84737644	chr18:84737059-84737644	0	8	0	0.818427	NA
chr18	84590121	84590620	chr18:84590121-84590620	chr18	84759513	84760012	chr18:84759513-84760012	0	12	0	1.22764	NA
chr18	84591232	84591692	chr18:84591232-84591692	chr18	84760624	84761084	chr18:84760624-84761084	5	0	0.693849	0	NA
chr19	4207768	4208004	chr19:4207768-4208004	chr19	4207768	4208004	chr19:4207768-4208004	0	1	0	0.102303	NA
chr19	4209658	4210475	chr19:4209658-4210475	chr19	4209658	4210475	chr19:4209658-4210475	2	0	0.277539	0	NA
chr19	4210705	4211111	chr19:4210705-4211111	chr19	4210705	4211111	chr19:4210705-4211111	0	0	0	0	NA
chr19	4254031	4257651	chr19:4254031-4257651	chr19	4254031	4257651	chr19:4254031-4257651	0	2	0	0.204607	NA
chr19	4994326	4994537	chr19:4994326-4994537	chr19	4994326	4994537	chr19:4994326-4994537	0	0	0	0	NA
chr19	4996545	4997119	chr19:4996545-4997119	chr19	4996545	4997119	chr19:4996545-4997119	0	0	0	0	NA
chr19	5001449	5001810	chr19:5001449-5001810	chr19	5001449	5001810	chr19:5001449-5001810	0	0	0	0	NA
chr19	6815423	6815843	chr19:6815423-6815843	chr19	6889913	6890333	chr19:6889913-6890333	2	0	0.277539	0	NA
chr19	6816628	6817104	chr19:6816628-6817104	chr19	6891118	6891594	chr19:6891118-6891594	0	0	0	0	NA
chr19	8986124	8986361	chr19:8986124-8986361	chr19	9060614	9060851	chr19:9060614-9060851	2	0	0.277539	0	NA
chr19	14837022	14837341	chr19:14837022-14837341	chr19	14911512	14911831	chr19:14911512-14911831	0	0	0	0	NA
chr19	14841791	14842058	chr19:14841791-14842058	chr19	14916281	14916548	chr19:14916281-14916548	0	0	0	0	NA
chr19	16015574	16028670	chr19:16015574-16028670	chr19	16090064	16103160	chr19:16090064-16103160	16	0	2.22032	0	NA
chr19	18930620	18934167	chr19:18930620-18934167	chr19	19005110	19008657	chr19:19005110-19008657	0	2	0	0.204607	NA
chr19	21293946	21295010	chr19:21293946-21295010	chr19	21368436	21369500	chr19:21368436-21369500	0	0	0	0	NA
chr19	22990479	22995406	chr19:22990479-22995406	chr19	23064969	23069896	chr19:23064969-23069896	0	0	0	0	NA
chr19	27344751	27373932	chr19:27344751-27373932	chr19	27419241	27448422	chr19:27419241-27448422	11	0	1.52647	0	NA
chr19	32837095	32837257	chr19:32837095-32837257	chr19	32911585	32911747	chr19:32911585-32911747	0	0	0	0	NA
chr19	32974990	32980063	chr19:32974990-32980063	chr19	33049480	33054553	chr19:33049480-33054553	0	0	0	0	NA
chr19	38318307	38324281	chr19:38318307-38324281	chr19	38392797	38398771	chr19:38392797-38398771	0	2	0	0.204607	NA
chr19	53460615	53462137	chr19:53460615-53462137	chr19	53535105	53536627	chr19:53535105-53536627	4	0	0.555079	0	NA
chr19	53550337	53551090	chr19:53550337-53551090	chr19	53624827	53625580	chr19:53624827-53625580	4	0	0.555079	0	NA
chr19	58148051	58148587	chr19:58148051-58148587	chr19	58222541	58223077	chr19:58222541-58223077	0	0	0	0	NA
chr19	58925526	58942375	chr19:58925526-58942375	chr19	59000016	59016865	chr19:59000016-59016865	9	0	1.24893	0	NA
chr19	58927100	58931984	chr19:58927100-58931984	chr19	59001590	59006474	chr19:59001590-59006474	5	0	0.693849	0	NA
chrX	7750596	7750898	chrX:7750596-7750898	chrX	7327722	7328024	chrX:7327722-7328024	0	2	0	0.204607	NA
chrX	7982541	7983157	chrX:7982541-7983157	chrX	7559667	7560283	chrX:7559667-7560283	0	0	0	0	NA
chrX	7983410	7983770	chrX:7983410-7983770	chrX	7560536	7560896	chrX:7560536-7560896	0	0	0	0	NA
chrX	8049172	8059824	chrX:8049172-8059824	chrX	7626298	7636950	chrX:7626298-7636950	7	0	0.971388	0	NA
chrX	12866385	12867039	chrX:12866385-12867039	chrX	12443511	12444165	chrX:12443511-12444165	0	0	0	0	NA
chrX	13183441	13184474	chrX:13183441-13184474	chrX	12760567	12761600	chrX:12760567-12761600	0	0	0	0	NA
chrX	13234641	13236283	chrX:13234641-13236283	chrX	12811767	12813409	chrX:12811767-12813409	2	0	0.277539	0	NA
chrX	20797805	20798276	chrX:20797805-20798276	chrX	20374931	20375402	chrX:20374931-20375402	2	0	0.277539	0	NA
chrX	20799742	20800711	chrX:20799742-20800711	chrX	20376868	20377837	chrX:20376868-20377837	0	0	0	0	NA
chrX	20801385	20801965	chrX:20801385-20801965	chrX	20378511	20379091	chrX:20378511-20379091	0	0	0	0	NA
chrX	20803169	20803820	chrX:20803169-20803820	chrX	20380295	20380946	chrX:20380295-20380946	0	0	0	0	NA
chrX	20804046	20804436	chrX:20804046-20804436	chrX	20381172	20381562	chrX:20381172-20381562	0	0	0	0	NA
chrX	20810960	20811426	chrX:20810960-20811426	chrX	20388086	20388552	chrX:20388086-20388552	0	0	0	0	NA
chrX	20811938	20812576	chrX:20811938-20812576	chrX	20389064	20389702	chrX:20389064-20389702	0	0	0	0	NA
chrX	20993274	20994036	chrX:20993274-20994036	chrX	20570400	20571162	chrX:20570400-20571162	0	2	0	0.204607	NA
chrX	36804108	36804299	chrX:36804108-36804299	chrX	34344103	34344294	chrX:34344103-34344294	0	0	0	0	NA
chrX	36807473	36807848	chrX:36807473-36807848	chrX	34347468	34347843	chrX:34347468-34347843	0	2	0	0.204607	NA
chrX	52734749	52748523	chrX:52734749-52748523	chrX	50087926	50101700	chrX:50087926-50101700	0	0	0	0	NA
chrX	52743390	52744958	chrX:52743390-52744958	chrX	50096567	50098135	chrX:50096567-50098135	0	0	0	0	NA
chrX	61090455	61118916	chrX:61090455-61118916	chrX	58343630	58372091	chrX:58343630-58372091	0	0	0	0	NA
chrX	61134713	61175991	chrX:61134713-61175991	chrX	58387888	58429166	chrX:58387888-58429166	2	0	0.277539	0	NA
chrX	68503151	68504368	chrX:68503151-68504368	chrX	65756326	65757543	chrX:65756326-65757543	0	0	0	0	NA
chrX	71854941	71855644	chrX:71854941-71855644	chrX	69100280	69100983	chrX:69100280-69100983	0	0	0	0	NA
chrX	94422840	94423361	chrX:94422840-94423361	chrX	91668179	91668700	chrX:91668179-91668700	2	0	0.277539	0	NA
chrX	94874551	94883153	chrX:94874551-94883153	chrX	92119890	92128492	chrX:92119890-92128492	0	2	0	0.204607	NA
chrX	94893705	94895481	chrX:94893705-94895481	chrX	92139044	92140820	chrX:92139044-92140820	0	0	0	0	NA
chrX	94903982	94905768	chrX:94903982-94905768	chrX	92149321	92151107	chrX:92149321-92151107	0	0	0	0	NA
chrX	94906046	94911917	chrX:94906046-94911917	chrX	92151385	92157256	chrX:92151385-92157256	4	0	0.555079	0	NA
chrX	95961856	95965203	chrX:95961856-95965203	chrX	93157195	93160542	chrX:93157195-93160542	0	0	0	0	NA
chrX	99390728	99391068	chrX:99390728-99391068	chrX	96586067	96586407	chrX:96586067-96586407	0	0	0	0	NA
chrX	101465794	101466130	chrX:101465794-101466130	chrX	98661133	98661469	chrX:98661133-98661469	0	0	0	0	NA
chrX	101472834	101473054	chrX:101472834-101473054	chrX	98668173	98668393	chrX:98668173-98668393	0	2	0	0.204607	NA
chrX	101474624	101475085	chrX:101474624-101475085	chrX	98669963	98670424	chrX:98669963-98670424	0	2	0	0.204607	NA
chrX	101476315	101476779	chrX:101476315-101476779	chrX	98671654	98672118	chrX:98671654-98672118	2	0	0.277539	0	NA
chrX	101478109	101478535	chrX:101478109-101478535	chrX	98673448	98673874	chrX:98673448-98673874	0	6	0	0.613821	NA
chrX	101480842	101481441	chrX:101480842-101481441	chrX	98676181	98676780	chrX:98676181-98676780	0	0	0	0	NA
chrX	101520792	101521001	chrX:101520792-101521001	chrX	98716131	98716340	chrX:98716131-98716340	0	2	0	0.204607	NA
chrX	101783982	101801806	chrX:101783982-101801806	chrX	98979321	98997145	chrX:98979321-98997145	6	0	0.832618	0	NA
chrX	101794592	101799005	chrX:101794592-101799005	chrX	98989931	98994344	chrX:98989931-98994344	0	0	0	0	NA
chrX	102010830	102011863	chrX:102010830-102011863	chrX	99206169	99207202	chrX:99206169-99207202	0	0	0	0	NA
chrX	103286488	103288172	chrX:103286488-103288172	chrX	100481827	100483511	chrX:100481827-100483511	0	2	0	0.204607	NA
chrX	103431517	103484957	chrX:103431517-103484957	chrX	100626856	100680296	chrX:100626856-100680296	21	0	2.91416	0	NA
chrX	103460373	103483233	chrX:103460373-103483233	chrX	100655712	100678572	chrX:100655712-100678572	2	0	0.277539	0	NA
chrX	105372257	105394531	chrX:105372257-105394531	chrX	102567596	102589870	chrX:102567596-102589870	2	0	0.277539	0	NA
chrX	105372994	105391754	chrX:105372994-105391754	chrX	102568333	102587093	chrX:102568333-102587093	2	0	0.277539	0	NA
chrX	123021114	123024543	chrX:123021114-123024543	chrX	120134723	120138152	chrX:120134723-120138152	1	0	0.13877	0	NA
chrX	123186765	123188795	chrX:123186765-123188795	chrX	120300374	120302404	chrX:120300374-120302404	0	0	0	0	NA
chrX	123210419	123213300	chrX:123210419-123213300	chrX	120324028	120326909	chrX:120324028-120326909	0	0	0	0	NA
chrX	123217485	123217888	chrX:123217485-123217888	chrX	120331094	120331497	chrX:120331094-120331497	0	0	0	0	NA
chrX	123240364	123247561	chrX:123240364-123247561	chrX	120353973	120361170	chrX:120353973-120361170	4	0	0.555079	0	NA
chrX	123477264	123484462	chrX:123477264-123484462	chrX	120590873	120598071	chrX:120590873-120598071	0	0	0	0	NA
chrX	123671154	123671557	chrX:123671154-123671557	chrX	120784763	120785166	chrX:120784763-120785166	0	0	0	0	NA
chrX	123705488	123706618	chrX:123705488-123706618	chrX	120819097	120820227	chrX:120819097-120820227	0	0	0	0	NA
chrX	123849442	123849989	chrX:123849442-123849989	chrX	120963051	120963598	chrX:120963051-120963598	0	0	0	0	NA
chrX	123863001	123863672	chrX:123863001-123863672	chrX	120976610	120977281	chrX:120976610-120977281	0	0	0	0	NA
chrX	123890522	123893751	chrX:123890522-123893751	chrX	121004131	121007360	chrX:121004131-121007360	0	0	0	0	NA
chrX	123919038	123924798	chrX:123919038-123924798	chrX	121032647	121038407	chrX:121032647-121038407	4	0	0.555079	0	NA
chrX	124380076	124386923	chrX:124380076-124386923	chrX	121493685	121500532	chrX:121493685-121500532	0	0	0	0	NA
chrX	124407296	124410523	chrX:124407296-124410523	chrX	121520905	121524132	chrX:121520905-121524132	0	0	0	0	NA
chrX	124498912	124499866	chrX:124498912-124499866	chrX	121612521	121613475	chrX:121612521-121613475	0	0	0	0	NA
chrX	124561491	124562122	chrX:124561491-124562122	chrX	121675100	121675731	chrX:121675100-121675731	0	0	0	0	NA
chrX	124884339	124884863	chrX:124884339-124884863	chrX	122185459	122185983	chrX:122185459-122185983	0	0	0	0	NA
chrX	126015906	126016860	chrX:126015906-126016860	chrX	122622601	122623555	chrX:122622601-122623555	0	0	0	0	NA
chrX	126016903	126024131	chrX:126016903-126024131	chrX	122623598	122630826	chrX:122623598-122630826	0	0	0	0	NA
chrX	126042199	126045427	chrX:126042199-126045427	chrX	122648894	122652122	chrX:122648894-122652122	0	0	0	0	NA
chrX	126688633	126693341	chrX:126688633-126693341	chrX	123295328	123300036	chrX:123295328-123300036	0	0	0	0	NA
chrX	126768943	126770999	chrX:126768943-126770999	chrX	123303475	123305531	chrX:123303475-123305531	0	0	0	0	NA
chrX	126771715	126773442	chrX:126771715-126773442	chrX	123306247	123307974	chrX:123306247-123307974	0	0	0	0	NA
chrX	139346237	139356986	chrX:139346237-139356986	chrX	135880776	135891525	chrX:135880776-135891525	0	2	0	0.204607	NA
chrX	139347491	139357738	chrX:139347491-139357738	chrX	135882030	135892277	chrX:135882030-135892277	0	2	0	0.204607	NA
chrX	140489816	140490320	chrX:140489816-140490320	chrX	137024355	137024859	chrX:137024355-137024859	0	0	0	0	NA
chrX	142532433	142546982	chrX:142532433-142546982	chrX	138966976	138981525	chrX:138966976-138981525	0	0	0	0	NA
chrX	142533265	142533870	chrX:142533265-142533870	chrX	138967808	138968413	chrX:138967808-138968413	0	0	0	0	NA
chrX	142534947	142535410	chrX:142534947-142535410	chrX	138969490	138969953	chrX:138969490-138969953	0	0	0	0	NA
chrX	151176328	151179716	chrX:151176328-151179716	chrX	147610871	147614259	chrX:147610871-147614259	0	0	0	0	NA
chrX	155304272	155306426	chrX:155304272-155306426	chrX	151738815	151740969	chrX:151738815-151740969	0	19	0	1.94377	NA
chr19	5842307	5845476	chr19:5842307-5845476	chr19	5842307	5845476	chr19:5842307-5845476	171	498	23.7296	50.9471	1.10231
chr6	129201495	129258719	chr6:129201495-129258719	chr6	129151513	129208737	chr6:129151513-129208737	220	494	30.5293	50.5379	0.727169
chr9	118150908	118175932	chr9:118150908-118175932	chr9	118060026	118085050	chr9:118060026-118085050	260	490	36.0801	50.1287	0.474432
chrX	75720806	75765680	chrX:75720806-75765680	chrX	72966145	73011019	chrX:72966145-73011019	177	487	24.5622	49.8218	1.02033
chr9	118150231	118170376	chr9:118150231-118170376	chr9	118059349	118079494	chr9:118059349-118079494	243	475	33.721	48.5941	0.527133
chr5	109804464	110058043	chr5:109804464-110058043	chr5	110233483	110487062	chr5:110233483-110487062	205	472	28.4478	48.2872	0.763325
chr2	22897581	22924855	chr2:22897581-22924855	chr2	22753101	22780375	chr2:22753101-22780375	161	470	22.3419	48.0826	1.10576
chr10	73096650	73484120	chr10:73096650-73484120	chr10	72559398	72946868	chr10:72559398-72946868	311	469	43.1574	47.9803	0.152835
chr6	116142257	116194181	chr6:116142257-116194181	chr6	116092275	116144199	chr6:116092275-116144199	197	466	27.3376	47.6734	0.802296
chr1	132971330	132988904	chr1:132971330-132988904	chr1	134867907	134885481	chr1:134867907-134885481	210	466	29.1416	47.6734	0.710102
chr5	121219784	121282533	chr5:121219784-121282533	chr5	121669793	121732542	chr5:121669793-121732542	249	465	34.5537	47.5711	0.461247
chr17	3213919	3257944	chr17:3213919-3257944	chr17	3213919	3257944	chr17:3213919-3257944	214	463	29.6967	47.3665	0.673563
chr6	31220351	31337353	chr6:31220351-31337353	chr6	31170351	31287353	chr6:31170351-31287353	205	458	28.4478	46.855	0.719885
chr13	62015641	62062715	chr13:62015641-62062715	chr13	62117001	62164075	chr13:62117001-62164075	219	457	30.3906	46.7527	0.621425
chr2	176799121	176929695	chr2:176799121-176929695	chr2	176583826	176714400	chr2:176583826-176714400	285	454	39.5494	46.4458	0.231892
chr4	147782317	147809840	chr4:147782317-147809840	chr4	147156426	147183949	chr4:147156426-147183949	185	446	25.6724	45.6273	0.82968
chr5	104507399	104555873	chr5:104507399-104555873	chr5	104936418	104984892	chr5:104936418-104984892	204	444	28.309	45.4227	0.682152
chr9	65799622	65829202	chr9:65799622-65829202	chr9	65647429	65677009	chr9:65647429-65677009	160	437	22.2032	44.7066	1.00972
chr9	65799622	65829312	chr9:65799622-65829312	chr9	65647429	65677119	chr9:65647429-65677119	160	437	22.2032	44.7066	1.00972
chr2	158343285	158365559	chr2:158343285-158365559	chr2	158169021	158191295	chr2:158169021-158191295	155	436	21.5093	44.6043	1.05222
chr9	113739853	113806052	chr9:113739853-113806052	chr9	113648971	113715170	chr9:113648971-113715170	194	436	26.9213	44.6043	0.728433
chr2	49018259	49118784	chr2:49018259-49118784	chr2	48873779	48974304	chr2:48873779-48974304	147	431	20.3991	44.0928	1.11203
chr17	29046059	29080736	chr17:29046059-29080736	chr17	29183004	29217681	chr17:29183004-29217681	216	431	29.9743	44.0928	0.556818
chr2	158353700	158361580	chr2:158353700-158361580	chr2	158179436	158187316	chr2:158179436-158187316	140	427	19.4278	43.6836	1.16897
chr5	32831444	32858143	chr5:32831444-32858143	chr5	33174093	33200792	chr5:33174093-33200792	186	423	25.8112	43.2743	0.745517
chr17	6265276	6362150	chr17:6265276-6362150	chr17	6265276	6362150	chr17:6265276-6362150	261	420	36.2189	42.9674	0.246501
chr4	127033397	127043996	chr4:127033397-127043996	chr4	126710641	126721240	chr4:126710641-126721240	198	418	27.4764	42.7628	0.638164
chr2	175641144	175702743	chr2:175641144-175702743	chr2	175640276	175701875	chr2:175640276-175701875	280	412	38.8555	42.149	0.117379
chr5	34369933	34410719	chr5:34369933-34410719	chr5	34712582	34753368	chr5:34712582-34753368	232	399	32.1946	40.8191	0.342426
chr5	31554045	31614041	chr5:31554045-31614041	chr5	31856418	31916414	chr5:31856418-31916414	239	399	33.166	40.8191	0.29954
chrX	19167242	19276866	chrX:19167242-19276866	chrX	18744368	18853992	chrX:18744368-18853992	124	397	17.2074	40.6145	1.23896
chr2	181930199	181931002	chr2:181930199-181931002	chr2	181664904	181665707	chr2:181664904-181665707	4	0	0.555079	0	NA
chr5	31554045	31613944	chr5:31554045-31613944	chr5	31856418	31916317	chr5:31856418-31916317	234	396	32.4721	40.5122	0.319154
chr8	121840149	121841805	chr8:121840149-121841805	chr8	124364049	124365705	chr8:124364049-124365705	164	394	22.7582	40.3075	0.824661
chr7	4875739	4911713	chr7:4875739-4911713	chr7	4827341	4863315	chr7:4827341-4863315	153	392	21.2318	40.1029	0.917484
chr6	50389190	50459364	chr6:50389190-50459364	chr6	50339189	50409363	chr6:50339189-50409363	161	392	22.3419	40.1029	0.843955
chr5	100416324	100440648	chr5:100416324-100440648	chr5	100845343	100869667	chr5:100845343-100869667	211	387	29.2804	39.5914	0.435252
chr1	69484618	69523992	chr1:69484618-69523992	chr1	69531192	69570566	chr1:69531192-69570566	268	387	37.1903	39.5914	0.0902622
chr2	167260201	167292295	chr2:167260201-167292295	chr2	167085701	167117795	chr2:167085701-167117795	164	377	22.7582	38.5684	0.76103
chr15	83435835	83464234	chr15:83435835-83464234	chr15	83266265	83294664	chr15:83266265-83294664	111	373	15.4034	38.1592	1.30878
chr14	61635525	61682325	chr14:61635525-61682325	chr14	62254362	62301162	chr14:62254362-62301162	268	369	37.1903	37.75	0.0215494
chr2	128162560	128369184	chr2:128162560-128369184	chr2	127988296	128194920	chr2:127988296-128194920	226	365	31.362	37.3407	0.251735
chr14	61644728	61688659	chr14:61644728-61688659	chr14	62263565	62307496	chr14:62263565-62307496	252	359	34.97	36.7269	0.0707217
chr14	61644728	61689449	chr14:61644728-61689449	chr14	62263565	62308286	chr14:62263565-62308286	252	359	34.97	36.7269	0.0707217
chr5	115356192	115384416	chr5:115356192-115384416	chr5	115806201	115834425	chr5:115806201-115834425	162	356	22.4807	36.42	0.696045
chr17	21876384	21958808	chr17:21876384-21958808	chr17	22013351	22095775	chr17:22013351-22095775	231	356	32.0558	36.42	0.184146
chr5	76759276	76776125	chr5:76759276-76776125	chr5	77188301	77205150	chr5:77188301-77205150	160	355	22.2032	36.3177	0.709909
chr11	117075521	117087485	chr11:117075521-117087485	chr11	116936835	116948799	chr11:116936835-116948799	122	351	16.9299	35.9085	1.08475
chr8	71949547	71973049	chr8:71949547-71973049	chr8	74473446	74496948	chr8:74473446-74496948	146	347	20.2604	35.4993	0.809129
chr5	136916326	136950551	chr5:136916326-136950551	chr5	137392196	137426421	chr5:137392196-137426421	129	343	17.9013	35.0901	0.970999
chr11	3638123	3654447	chr11:3638123-3654447	chr11	3538126	3554450	chr11:3538126-3554450	196	339	27.1989	34.6809	0.350593
chr2	150182340	150275939	chr2:150182340-150275939	chr2	150008076	150101675	chr2:150008076-150101675	168	330	23.3133	33.7601	0.534166
chr6	42709065	42710072	chr6:42709065-42710072	chr6	42659064	42660071	chr6:42659064-42660071	0	0	0	0	NA
chr17	14974762	15002836	chr17:14974762-15002836	chr17	15111726	15139800	chr17:15111726-15139800	144	329	19.9828	33.6578	0.75218
chr17	29055509	29079128	chr17:29055509-29079128	chr17	29192454	29216073	chr17:29192454-29216073	166	329	23.0358	33.6578	0.547066
chr6	40749476	40769123	chr6:40749476-40769123	chr6	40699475	40719122	chr6:40699475-40719122	5	0	0.693849	0	NA
chr15	96202162	96286476	chr15:96202162-96286476	chr15	96032593	96116907	chr15:96032593-96116907	185	326	25.6724	33.3509	0.377508
chr5	100420730	100429513	chr5:100420730-100429513	chr5	100849749	100858532	chr5:100849749-100858532	162	325	22.4807	33.2486	0.564608
chr8	71951015	71970333	chr8:71951015-71970333	chr8	74474914	74494232	chr8:74474914-74494232	137	323	19.0115	33.044	0.79752
chrX	153724710	153746732	chrX:153724710-153746732	chrX	150159253	150181275	chrX:150159253-150181275	151	318	20.9542	32.5325	0.63464
chrX	153723939	153741295	chrX:153723939-153741295	chrX	150158482	150175838	chrX:150158482-150175838	154	318	21.3705	32.5325	0.606258
chr5	76809988	76842589	chr5:76809988-76842589	chr5	77239013	77271614	chr5:77239013-77271614	146	317	20.2604	32.4302	0.678676
chr12	54743089	54797188	chr12:54743089-54797188	chr12	55844076	55898175	chr12:55844076-55898175	100	316	13.877	32.3279	1.22009
chr8	64734504	64792903	chr8:64734504-64792903	chr8	67213301	67271700	chr8:67213301-67271700	132	313	18.3176	32.021	0.805786
chr2	173596098	173659542	chr2:173596098-173659542	chr2	173421599	173485043	chr2:173421599-173485043	170	311	23.5909	31.8164	0.431541
chr8	19682259	19700836	chr8:19682259-19700836	chr8	19682259	19700836	chr8:19682259-19700836	143	310	19.8441	31.7141	0.676415
chr4	129811219	129839166	chr4:129811219-129839166	chr4	129488463	129516410	chr4:129488463-129516410	204	309	28.309	31.6118	0.159199
chr5	136919138	136937106	chr5:136919138-136937106	chr5	137395008	137412976	chr5:137395008-137412976	120	308	16.6524	31.5095	0.920058
chr2	177124003	177206497	chr2:177124003-177206497	chr2	176908708	176991202	chr2:176908708-176991202	152	308	21.093	31.5095	0.579021
chr5	23422404	23433309	chr5:23422404-23433309	chr5	22928222	22939127	chr5:22928222-22939127	135	305	18.7339	31.2025	0.736011
chr5	109832057	109947681	chr5:109832057-109947681	chr5	110261076	110376700	chr5:110261076-110376700	142	305	19.7053	31.2025	0.66308
chr17	3004526	3086000	chr17:3004526-3086000	chr17	3004526	3086000	chr17:3004526-3086000	173	304	24.0072	31.1002	0.373461
chr12	12869387	12911592	chr12:12869387-12911592	chr12	12876193	12918398	chr12:12876193-12918398	154	303	21.3705	30.9979	0.536549
chr17	29057474	29078961	chr17:29057474-29078961	chr17	29194419	29215906	chr17:29194419-29215906	160	303	22.2032	30.9979	0.481407
chr10	73263902	73336978	chr10:73263902-73336978	chr10	72726650	72799726	chr10:72726650-72799726	162	300	22.4807	30.691	0.44913
chr12	32096613	32123702	chr12:32096613-32123702	chr12	32781478	32808567	chr12:32781478-32808567	111	298	15.4034	30.4864	0.984914
chr9	101073130	101085553	chr9:101073130-101085553					125	298	17.3462	30.4864	0.813546
chrX	135895454	135951808	chrX:135895454-135951808	chrX	132429993	132486347	chrX:132429993-132486347	126	298	17.485	30.4864	0.80205
chr2	130872541	130906396	chr2:130872541-130906396	chr2	130698277	130732132	chr2:130698277-130732132	120	297	16.6524	30.3841	0.86759
chr1	194976375	195021493	chr1:194976375-195021493	chr1	196802569	196847687	chr1:196802569-196847687	135	297	18.7339	30.3841	0.697665
chrX	150393167	150478855	chrX:150393167-150478855	chrX	146827710	146913398	chrX:146827710-146913398	137	291	19.0115	29.7703	0.647005
chr2	173595487	173654586	chr2:173595487-173654586	chr2	173420988	173480087	chr2:173420988-173480087	155	291	21.5093	29.7703	0.468913
chr15	96260998	96285253	chr15:96260998-96285253	chr15	96091429	96115684	chr15:96091429-96115684	156	291	21.6481	29.7703	0.459635
chr6	40743619	40770168	chr6:40743619-40770168	chr6	40693618	40720167	chr6:40693618-40720167	5	0	0.693849	0	NA
chr2	175277900	175491149	chr2:175277900-175491149	chr2	175103401	175316650	chr2:175103401-175316650	217	290	30.113	29.668	-0.0214805
chr17	46835212	46860970	chr17:46835212-46860970	chr17	46972161	46997919	chr17:46972161-46997919	146	288	20.2604	29.4634	0.540262
chr6	39319400	39319897	chr6:39319400-39319897	chr6	39269399	39269896	chr6:39269399-39269896	0	4	0	0.409214	NA
chr13	70606429	70698453	chr13:70606429-70698453	chr13	70745307	70837331	chr13:70745307-70837331	103	287	14.2933	29.3611	1.03857
chr17	17294443	17319629	chr17:17294443-17319629	chr17	17431407	17456593	chr17:17431407-17456593	109	287	15.1259	29.3611	0.956884
chr15	96134819	96284490	chr15:96134819-96284490	chr15	95965250	96114921	chr15:95965250-96114921	200	287	27.7539	29.3611	0.0812123
chr2	119587035	119609374	chr2:119587035-119609374	chr2	119412771	119435110	chr2:119412771-119435110	146	286	20.2604	29.2588	0.530208
chr2	167578746	167588845	chr2:167578746-167588845	chr2	167404246	167414345	chr2:167404246-167414345	93	284	12.9056	29.0542	1.17075
chr4	130362479	130392509	chr4:130362479-130392509	chr4	130039726	130069550	chr4:130039726-130069550	143	284	19.8441	29.0542	0.550037
chr6	39317709	39318181	chr6:39317709-39318181	chr6	39267708	39268180	chr6:39267708-39268180	0	0	0	0	NA
chr6	50411569	50456201	chr6:50411569-50456201	chr6	50361568	50406200	chr6:50361568-50406200	108	283	14.9871	28.9519	0.949932
chr7	25269795	25278706	chr7:25269795-25278706	chr7	26054814	26063725	chr7:26054814-26063725	134	283	18.5951	28.9519	0.638731
chr11	3639785	3648808	chr11:3639785-3648808	chr11	3539788	3548811	chr11:3539788-3548811	142	283	19.7053	28.9519	0.555073
chr6	39316992	39317509	chr6:39316992-39317509	chr6	39266991	39267508	chr6:39266991-39267508	0	0	0	0	NA
chr12	20990454	21085785	chr12:20990454-21085785	chr12	20996315	21091646	chr12:20996315-21091646	116	282	16.0973	28.8496	0.841732
chr3	79178474	79290423	chr3:79178474-79290423	chr3	78982396	79094345	chr3:78982396-79094345	133	280	18.4564	28.645	0.634162
chr4	129820747	129838046	chr4:129820747-129838046	chr4	129497991	129515290	chr4:129497991-129515290	187	280	25.9499	28.645	0.14255
chrX	11662163	11782793	chrX:11662163-11782793	chrX	11239289	11359919	chrX:11239289-11359919	101	276	14.0157	28.2357	1.01047
chr18	31615241	31625340	chr18:31615241-31625340	chr18	31774895	31784994	chr18:31774895-31784994	83	274	11.5179	28.0311	1.28315
chr17	22198492	22329554	chr17:22198492-22329554	chr17	22335459	22466521	chr17:22335459-22466521	130	274	18.0401	28.0311	0.635826
chr4	3479029	3516728	chr4:3479029-3516728	chr4	3406176	3443875	chr4:3406176-3443875	88	272	12.2117	27.8265	1.18819
chr13	70606756	70637638	chr13:70606756-70637638	chr13	70745634	70776516	chr13:70745634-70776516	92	272	12.7668	27.8265	1.12406
chr15	85703773	85706660	chr15:85703773-85706660	chr15	85534203	85537090	chr15:85534203-85537090	119	271	16.5136	27.7242	0.747493
chr14	115024439	115063938	chr14:115024439-115063938	chr14	115423661	115463160	chr14:115423661-115463160	107	270	14.8484	27.6219	0.89551
chr2	180249495	180249964	chr2:180249495-180249964	chr2	179984200	179984669	chr2:179984200-179984669	1	0	0.13877	0	NA
chr10	127381327	127419526	chr10:127381327-127419526	chr10	126818383	126856582	chr10:126818383-126856582	76	268	10.5465	27.4173	1.37832
chr17	34943970	34953064	chr17:34943970-34953064	chr17	35080915	35090009	chr17:35080915-35090009	164	268	22.7582	27.4173	0.268699
chr2	130871585	130903934	chr2:130871585-130903934	chr2	130697321	130729670	chr2:130697321-130729670	104	264	14.4321	27.0081	0.904116
chr7	41597840	41630640	chr7:41597840-41630640	chr7	48853210	48886010	chr7:48853210-48886010	108	264	14.9871	27.0081	0.849668
chr2	176229189	176319863	chr2:176229189-176319863	chr2	176619222	176709894	chr2:176619222-176709894	170	262	23.5909	26.8035	0.184194
chr15	85646083	85667675	chr15:85646083-85667675	chr15	85476513	85498105	chr15:85476513-85498105	138	259	19.1502	26.4966	0.468445
chr12	3407354	3426580	chr12:3407354-3426580	chr12	3407354	3426580	chr12:3407354-3426580	155	255	21.5093	26.0874	0.278391
chr17	33858581	33891080	chr17:33858581-33891080	chr17	33995526	34028025	chr17:33995526-34028025	92	253	12.7668	25.8828	1.01959
chr1	161035179	161040573	chr1:161035179-161040573	chr1	162965310	162970704	chr1:162965310-162970704	106	252	14.7096	25.7805	0.809521
chr12	3406751	3425850	chr12:3406751-3425850	chr12	3406751	3425850	chr12:3406751-3425850	162	251	22.4807	25.6782	0.191855
chr6	39298009	39298491	chr6:39298009-39298491	chr6	39248008	39248490	chr6:39248008-39248490	0	0	0	0	NA
chrX	103480832	103515581	chrX:103480832-103515581	chrX	100676171	100710920	chrX:100676171-100710920	91	249	12.628	25.4736	1.01237
chr3	51980941	51990077	chr3:51980941-51990077	chr3	51784863	51793999	chr3:51784863-51793999	88	247	12.2117	25.2689	1.0491
chr12	81394589	81415313	chr12:81394589-81415313	chr12	82495576	82516300	chr12:82495576-82516300	100	247	13.877	25.2689	0.864673
chr6	86527316	86587560	chr6:86527316-86587560	chr6	86477310	86537554	chr6:86477310-86537554	122	247	16.9299	25.2689	0.577792
chr3	79195944	79287263	chr3:79195944-79287263	chr3	78999866	79091185	chr3:78999866-79091185	122	245	16.9299	25.0643	0.566062
chr9	96735090	96753729	chr9:96735090-96753729	chr9	96635509	96654148	chr9:96635509-96654148	88	244	12.2117	24.962	1.03147
chr7	42460564	42516127	chr7:42460564-42516127	chr7	49715934	49771497	chr7:49715934-49771497	103	242	14.2933	24.7574	0.792524
chr2	157535735	157554077	chr2:157535735-157554077	chr2	157361471	157379813	chr2:157361471-157379813	96	241	13.3219	24.6551	0.888088
chr8	92318067	92357231	chr8:92318067-92357231	chr8	94841966	94881130	chr8:94841966-94881130	117	240	16.2361	24.5528	0.596687
chr9	96732246	96752830	chr9:96732246-96752830	chr9	96632665	96653249	chr9:96632665-96653249	87	239	12.073	24.4505	1.01808
chr18	77993725	78038699	chr18:77993725-78038699	chr18	78190464	78235438	chr18:78190464-78235438	69	238	9.57511	24.3482	1.34645
chr4	146602039	146658160	chr4:146602039-146658160	chr4	145539879	145596000	chr4:145539879-145596000	112	238	15.5422	24.3482	0.647624
chr15	68330207	68361956	chr15:68330207-68361956	chr15	68161769	68193518	chr15:68161769-68193518	125	238	17.3462	24.3482	0.489195
chr2	155443410	155477515	chr2:155443410-155477515	chr2	155269146	155303251	chr2:155269146-155303251	139	238	19.289	24.3482	0.336038
chr5	123132734	123138193	chr5:123132734-123138193	chr5	123582743	123588202	chr5:123582743-123588202	92	237	12.7668	24.2459	0.925343
chr5	123132734	123138108	chr5:123132734-123138108	chr5	123582743	123588117	chr5:123582743-123588117	92	236	12.7668	24.1436	0.919243
chr9	20506754	20521414	chr9:20506754-20521414	chr9	20311198	20325858	chr9:20311198-20325858	105	236	14.5708	24.1436	0.728559
chrX	152286119	152328634	chrX:152286119-152328634	chrX	148720662	148763177	chrX:148720662-148763177	116	236	16.0973	24.1436	0.584824
chrX	105027156	105071729	chrX:105027156-105071729	chrX	102222495	102267068	chrX:102222495-102267068	118	234	16.3748	23.939	0.547883
chr8	39037872	39133090	chr8:39037872-39133090	chr8	40100926	40196144	chr8:40100926-40196144	108	232	14.9871	23.7344	0.663255
chr5	124035362	124052352	chr5:124035362-124052352	chr5	124485371	124502361	chr5:124485371-124502361	100	231	13.877	23.6321	0.768054
chr17	17325487	17351761	chr17:17325487-17351761	chr17	17462451	17488725	chr17:17462451-17488725	130	230	18.0401	23.5298	0.383284
chr6	86526247	86563489	chr6:86526247-86563489	chr6	86476241	86513483	chr6:86476241-86513483	101	229	14.0157	23.4275	0.741154
chr5	34353544	34380193	chr5:34353544-34380193	chr5	34696193	34722842	chr5:34696193-34722842	153	229	21.2318	23.4275	0.141978
chr13	74505253	74564452	chr13:74505253-74564452	chr13	74642701	74701900	chr13:74642701-74701900	120	227	16.6524	23.2229	0.47982
chr2	177530171	177603070	chr2:177530171-177603070	chr2	177314876	177387775	chr2:177314876-177387775	150	227	20.8155	23.2229	0.157891
chr5	124039017	124056741	chr5:124039017-124056741	chr5	124489026	124506750	chr5:124489026-124506750	98	225	13.5994	23.0183	0.759233
chr9	67566657	67635378	chr9:67566657-67635378	chr9	67414464	67483185	chr9:67414464-67483185	73	223	10.1302	22.8137	1.17124
chr7	59307007	59324149	chr7:59307007-59324149	chr7	66562377	66579519	chr7:66562377-66579519	52	222	7.21603	22.7114	1.65414
chr17	17234922	17269715	chr17:17234922-17269715	chr17	17371886	17406679	chr17:17371886-17406679	67	220	9.29757	22.5068	1.27543
chr10	3742641	3866465	chr10:3742641-3866465	chr10	6480076	6603900	chr10:6480076-6603900	94	220	13.0444	22.5068	0.786932
chr12	75643961	75677385	chr12:75643961-75677385	chr12	76744948	76778372	chr12:76744948-76778372	105	220	14.5708	22.5068	0.627276
chr11	119393100	119435646	chr11:119393100-119435646	chr11	119254414	119296960	chr11:119254414-119296960	109	219	15.1259	22.4044	0.566764
chr5	149119565	149184063	chr5:149119565-149184063	chr5	149931141	149995639	chr5:149931141-149995639	120	219	16.6524	22.4044	0.428058
chrX	105037197	105070096	chrX:105037197-105070096	chrX	102232536	102265435	chrX:102232536-102265435	102	216	14.1545	22.0975	0.642624
chr11	3639794	3647533	chr11:3639794-3647533	chr11	3539797	3547536	chr11:3539797-3547536	116	216	16.0973	22.0975	0.457068
chr16	64797024	64843423	chr16:64797024-64843423	chr16	64796850	64843249	chr16:64796850-64843249	126	216	17.485	22.0975	0.337769
chr6	100212763	100228537	chr6:100212763-100228537	chr6	100162757	100178531	chr6:100162757-100178531	68	213	9.43634	21.7906	1.20741
chrX	152298311	152327429	chrX:152298311-152327429	chrX	148732854	148761972	chrX:148732854-148761972	106	211	14.7096	21.586	0.55334
chr13	61602086	61993310	chr13:61602086-61993310	chr13	61703446	62094670	chr13:61703446-62094670	183	211	25.3949	21.586	-0.234439
chr4	136340775	136362499	chr4:136340775-136362499	chr4	135896690	135918414	chr4:135896690-135918414	116	210	16.0973	21.4837	0.416426
chr2	48951692	48988391	chr2:48951692-48988391	chr2	48807212	48843911	chr2:48807212-48843911	81	208	11.2403	21.2791	0.920751
chr14	33082109	33110458	chr14:33082109-33110458	chr14	33895295	33923644	chr14:33895295-33923644	91	208	12.628	21.2791	0.752807
chr5	106553424	106616698	chr5:106553424-106616698	chr5	106982443	107045717	chr5:106982443-107045717	106	208	14.7096	21.2791	0.532681
chr10	39663860	39722884	chr10:39663860-39722884	chr10	39383666	39442690	chr10:39383666-39442690	120	208	16.6524	21.2791	0.353711
chr4	123478273	123684322	chr4:123478273-123684322	chr4	123155516	123361565	chr4:123155516-123361565	142	207	19.7053	21.1768	0.103901
chr12	108765059	108792743	chr12:108765059-108792743	chr12	110003269	110030953	chr12:110003269-110030953	124	206	17.2074	21.0745	0.292466
chr6	83441755	83448322	chr6:83441755-83448322	chr6	83391749	83398316	chr6:83391749-83398316	74	205	10.269	20.9722	1.03019
chr2	22927181	22946380	chr2:22927181-22946380	chr2	22782701	22801900	chr2:22782701-22801900	110	204	15.2647	20.8699	0.451227
chr7	127452387	127467461	chr7:127452387-127467461	chr7	134595901	134610975	chr7:134595901-134610975	126	204	17.485	20.8699	0.255307
chr5	32843860	32854233	chr5:32843860-32854233	chr5	33186509	33196882	chr5:33186509-33196882	85	202	11.7954	20.6653	0.808982
chr19	61101773	61143972	chr19:61101773-61143972	chr19	61177676	61219875	chr19:61177676-61219875	114	202	15.8197	20.6653	0.385483
chr12	83855446	83921934	chr12:83855446-83921934	chr12	85196396	85262884	chr12:85196396-85262884	124	202	17.2074	20.6653	0.264177
chr9	96764199	96783198	chr9:96764199-96783198	chr9	96664618	96683617	chr9:96664618-96683617	77	201	10.6853	20.563	0.944427
chr5	22550401	22701177	chr5:22550401-22701177	chr5	22056219	22206995	chr5:22056219-22206995	123	201	17.0687	20.563	0.268699
chr9	113741473	113761668	chr9:113741473-113761668	chr9	113650591	113670786	chr9:113650591-113670786	85	200	11.7954	20.4607	0.794627
chrX	150397773	150441137	chrX:150397773-150441137	chrX	146832316	146875680	chrX:146832316-146875680	79	197	10.9628	20.1538	0.878433
chr18	38238405	38250198	chr18:38238405-38250198	chr18	38398059	38409852	chr18:38398059-38409852	84	197	11.6567	20.1538	0.789896
chr5	125381306	125399755	chr5:125381306-125399755	chr5	125861676	125880125	chr5:125861676-125880125	156	197	21.6481	20.1538	-0.103189
chr2	177544711	177576774	chr2:177544711-177576774	chr2	177329416	177361479	chr2:177329416-177361479	117	194	16.2361	19.8469	0.28971
chr8	92326031	92346375	chr8:92326031-92346375	chr8	94849930	94870274	chr8:94849930-94870274	79	192	10.9628	19.6423	0.841343
chr4	129699197	129714446	chr4:129699197-129714446	chr4	129376441	129391690	chr4:129376441-129391690	106	191	14.7096	19.54	0.40967
chr13	74430928	74463552	chr13:74430928-74463552	chr13	74568376	74601000	chr13:74568376-74601000	59	190	8.18741	19.4377	1.24737
chr19	61114984	61140801	chr19:61114984-61140801	chr19	61190887	61216704	chr19:61190887-61216704	102	190	14.1545	19.4377	0.457592
chr5	20951908	20971732	chr5:20951908-20971732	chr5	20457726	20477550	chr5:20457726-20477550	146	188	20.2604	19.233	-0.0750741
chr11	103122186	103132856	chr11:103122186-103132856	chr11	102983500	102994170	chr11:102983500-102994170	81	187	11.2403	19.1307	0.767206
chr17	17005122	17044937	chr17:17005122-17044937	chr17	17142086	17181901	chr17:17142086-17181901	93	187	12.9056	19.1307	0.567897
chr13	74434828	74463200	chr13:74434828-74463200	chr13	74572276	74600648	chr13:74572276-74600648	53	186	7.3548	19.0284	1.3714
chr2	174961650	175041049	chr2:174961650-175041049	chr2	174787151	174866550	chr2:174787151-174866550	128	186	17.7625	19.0284	0.0993204
chr5	25662811	25679535	chr5:25662811-25679535	chr5	25168629	25185353	chr5:25168629-25185353	93	185	12.9056	18.9261	0.552384
chr4	89099867	89128226	chr4:89099867-89128226	chr4	88745771	88774130	chr4:88745771-88774130	99	185	13.7382	18.9261	0.462186
chr4	89099868	89130419	chr4:89099868-89130419	chr4	88745772	88776323	chr4:88745772-88776323	101	185	14.0157	18.9261	0.433332
chr7	27803141	27831990	chr7:27803141-27831990	chr7	28588160	28617009	chr7:28588160-28617009	107	185	14.8484	18.9261	0.350076
chr6	122775621	122802810	chr6:122775621-122802810	chr6	122725639	122752828	chr6:122725639-122752828	121	184	16.7911	18.8238	0.16486
chr17	74180977	74200651	chr17:74180977-74200651	chr17	74580317	74599991	chr17:74580317-74599991	72	182	9.99142	18.6192	0.898031
chr11	6521949	6529170	chr11:6521949-6529170	chr11	6421952	6429173	chr11:6421952-6429173	69	181	9.57511	18.5169	0.951483
chr5	52190667	52245896	chr5:52190667-52245896	chr5	52581906	52637135	chr5:52581906-52637135	115	181	15.9585	18.5169	0.214517
chr9	20508899	20519073	chr9:20508899-20519073	chr9	20313343	20323517	chr9:20313343-20323517	82	180	11.3791	18.4146	0.694463
chr14	33162749	33185508	chr14:33162749-33185508	chr14	33975935	33998694	chr14:33975935-33998694	83	180	11.5179	18.4146	0.676975
chr17	26860287	26886175	chr17:26860287-26886175	chr17	26997232	27023120	chr17:26997232-27023120	109	180	15.1259	18.4146	0.28383
chr15	92343796	92370770	chr15:92343796-92370770	chr15	92174227	92201201	chr15:92174227-92201201	154	180	21.3705	18.4146	-0.214772
chr16	21794343	21815292	chr16:21794343-21815292	chr16	21794416	21815365	chr16:21794416-21815365	70	179	9.71388	18.3123	0.914694
chr5	52070028	52150177	chr5:52070028-52150177	chr5	52461267	52541416	chr5:52461267-52541416	106	179	14.7096	18.3123	0.316057
chr5	73948846	73955470	chr5:73948846-73955470	chr5	74340085	74346709	chr5:74340085-74346709	106	179	14.7096	18.3123	0.316057
chr4	137300150	137321304	chr4:137300150-137321304	chr4	136856065	136877219	chr4:136856065-136877219	44	177	6.10587	18.1077	1.56834
chr8	117208449	117225298	chr8:117208449-117225298	chr8	119732349	119749198	chr8:119732349-119749198	59	177	8.18741	18.1077	1.14512
chr9	55938252	55950003	chr9:55938252-55950003	chr9	55786059	55797810	chr9:55786059-55797810	73	176	10.1302	18.0054	0.829769
chr17	17006362	17044536	chr17:17006362-17044536	chr17	17143326	17181500	chr17:17143326-17181500	86	176	11.9342	18.0054	0.593328
chr1	63116450	63133649	chr1:63116450-63133649	chr1	63163024	63180223	chr1:63163024-63180223	98	175	13.5994	17.9031	0.396663
chr17	21939745	21962464	chr17:21939745-21962464	chr17	22076712	22099431	chr17:22076712-22099431	94	173	13.0444	17.6985	0.440201
chr5	36660819	36719336	chr5:36660819-36719336	chr5	37051929	37110575	chr5:37051929-37110575	132	173	18.3176	17.6985	-0.0496043
chr5	121309034	121339983	chr5:121309034-121339983	chr5	121759043	121789992	chr5:121759043-121789992	90	171	12.4893	17.4939	0.486161
chr11	94133482	94155731	chr11:94133482-94155731	chr11	93994796	94017045	chr11:93994796-94017045	100	171	13.877	17.4939	0.334158
chr4	89365958	89466582	chr4:89365958-89466582	chr4	89032649	89133273	chr4:89032649-89133273	145	171	20.1216	17.4939	-0.201895
chr17	46869085	46886609	chr17:46869085-46886609	chr17	47006034	47023558	chr17:47006034-47023558	49	170	6.79972	17.3916	1.35484
chr7	39450306	39480380	chr7:39450306-39480380	chr7	46705676	46735750	chr7:46705676-46735750	62	170	8.60372	17.3916	1.01536
chr7	92730859	92741468	chr7:92730859-92741468	chr7	99879369	99889978	chr7:99879369-99889978	102	170	14.1545	17.3916	0.297127
chr4	11175141	11191274	chr4:11175141-11191274	chr4	11102288	11118421	chr4:11102288-11118421	122	170	16.9299	17.3916	0.0388152
chr6	13851451	13903450	chr6:13851451-13903450	chr6	13801451	13853450	chr6:13801451-13853450	87	169	12.073	17.2893	0.518098
chr12	20615009	21022184	chr12:20615009-21022184	chr12	20620870	21028045	chr12:20620870-21028045	157	169	21.7868	17.2893	-0.33358
chr11	119389511	119425010	chr11:119389511-119425010	chr11	119250825	119286324	chr11:119250825-119286324	99	168	13.7382	17.187	0.323122
chr12	83869828	83921177	chr12:83869828-83921177	chr12	85210778	85262127	chr12:85210778-85262127	99	168	13.7382	17.187	0.323122
chr4	119732552	119789216	chr4:119732552-119789216	chr4	119405157	119461821	chr4:119405157-119461821	52	165	7.21603	16.8801	1.22604
chr17	70892994	70924193	chr17:70892994-70924193	chr17	71242334	71273533	chr17:71242334-71273533	65	165	9.02003	16.8801	0.904116
chr18	38235947	38247871	chr18:38235947-38247871	chr18	38395601	38407525	chr18:38395601-38407525	72	165	9.99142	16.8801	0.756559
chr15	92343832	92365643	chr15:92343832-92365643	chr15	92174263	92196074	chr15:92174263-92196074	146	164	20.2604	16.7778	-0.272111
chr10	82218197	82242219	chr10:82218197-82242219	chr10	81680942	81704964	chr10:81680942-81704964	67	163	9.29757	16.6755	0.842801
chr17	22283059	22320683	chr17:22283059-22320683	chr17	22420026	22457650	chr17:22420026-22457650	90	163	12.4893	16.6755	0.417037
chr13	48525514	48548163	chr13:48525514-48548163	chr13	48620883	48643532	chr13:48620883-48643532	128	163	17.7625	16.6755	-0.0911102
chr12	81356639	81375338	chr12:81356639-81375338	chr12	82457626	82476325	chr12:82457626-82476325	46	162	6.38341	16.5732	1.37645
chr14	64812816	64819065	chr14:64812816-64819065	chr14	65431653	65437902	chr14:65431653-65437902	51	162	7.07726	16.5732	1.22759
chr18	84566383	84591432	chr18:84566383-84591432	chr18	84735775	84760824	chr18:84735775-84760824	52	162	7.21603	16.5732	1.19957
chr6	47737040	47778526	chr6:47737040-47778526	chr6	47687039	47728525	chr6:47687039-47728525	230	162	31.917	16.5732	-0.945478
chr6	36840209	36842056	chr6:36840209-36842056	chr6	36790209	36792056	chr6:36790209-36792056	0	0	0	0	NA
chr5	124709790	124729255	chr5:124709790-124729255	chr5	125190340	125209625	chr5:125190340-125209625	78	161	10.824	16.4709	0.605676
chr16	4867323	4874772	chr16:4867323-4874772	chr16	4867323	4874772	chr16:4867323-4874772	38	159	5.27325	16.2662	1.62512
chr15	68341036	68363178	chr15:68341036-68363178	chr15	68172598	68194740	chr15:68172598-68194740	94	159	13.0444	16.2662	0.318456
chr5	115386042	115421716	chr5:115386042-115421716	chr5	115836051	115871725	chr5:115836051-115871725	109	159	15.1259	16.2662	0.10486
chr13	65236760	65264684	chr13:65236760-65264684	chr13	65338068	65365992	chr13:65338068-65365992	66	158	9.1588	16.1639	0.819548
chr15	36870500	36879816	chr15:36870500-36879816	chr15	36800255	36809571	chr15:36800255-36809571	89	156	12.3505	15.9593	0.36983
chr2	176225268	176261871	chr2:176225268-176261871	chr2	176677214	176713815	chr2:176677214-176713815	114	155	15.8197	15.857	0.003396
chr13	61806091	61867215	chr13:61806091-61867215	chr13	61907451	61968575	chr13:61907451-61968575	88	154	12.2117	15.7547	0.367517
chr2	178055014	178078435	chr2:178055014-178078435	chr2	177789719	177813140	chr2:177789719-177813140	90	154	12.4893	15.7547	0.335095
chr6	36815551	36843825	chr6:36815551-36843825	chr6	36765551	36793825	chr6:36765551-36793825	2	0	0.277539	0	NA
chr13	62633091	62683965	chr13:62633091-62683965	chr13	62734451	62785325	chr13:62734451-62785325	67	153	9.29757	15.6524	0.75146
chr5	124217533	124250020	chr5:124217533-124250020	chr5	124667542	124700029	chr5:124667542-124700029	104	153	14.4321	15.6524	0.11711
chr11	104443111	104468510	chr11:104443111-104468510	chr11	104304425	104329824	chr11:104304425-104329824	76	152	10.5465	15.5501	0.560162
chr17	22285871	22314810	chr17:22285871-22314810	chr17	22422838	22451777	chr17:22422838-22451777	86	151	11.9342	15.4478	0.372302
chrX	103493558	103506425	chrX:103493558-103506425	chrX	100688897	100701764	chrX:100688897-100701764	53	150	7.3548	15.3455	1.06106
chr1	181853176	181904400	chr1:181853176-181904400	chr1	183783307	183834531	chr1:183783307-183834531	65	150	9.02003	15.3455	0.766612
chr17	94751461	94781310	chr17:94751461-94781310	chr17	95150801	95180650	chr17:95150801-95180650	74	150	10.269	15.3455	0.579527
chrX	108834478	108886896	chrX:108834478-108886896	chrX	106029817	106082235	chrX:106029817-106082235	66	144	9.1588	14.7317	0.685692
chr13	97758296	97781170	chr13:97758296-97781170	chr13	98528251	98551125	chr13:98528251-98551125	118	144	16.3748	14.7317	-0.152556
chr1	195017399	195038908	chr1:195017399-195038908	chr1	196843593	196865102	chr1:196843593-196865102	32	143	4.44063	14.6294	1.72003
chr2	175405200	175405817	chr2:175405200-175405817	chr2	175230701	175231318	chr2:175230701-175231318	0	0	0	0	NA
chr11	5487348	5503147	chr11:5487348-5503147	chr11	5387351	5403150	chr11:5387351-5403150	68	143	9.43634	14.6294	0.63257
chr2	175117825	175141174	chr2:175117825-175141174	chr2	174943326	174966675	chr2:174943326-174966675	92	143	12.7668	14.6294	0.196471
chr6	28214119	28215468	chr6:28214119-28215468	chr6	28164119	28165468	chr6:28164119-28165468	31	141	4.30186	14.4248	1.74552
chr16	21794346	21809040	chr16:21794346-21809040	chr16	21794419	21809113	chr16:21794419-21809113	48	141	6.66095	14.4248	1.11475
chr11	95766561	95779510	chr11:95766561-95779510	chr11	95627875	95640824	chr11:95627875-95640824	55	141	7.63233	14.4248	0.918353
chr5	109995232	110014006	chr5:109995232-110014006	chr5	110424251	110443025	chr5:110424251-110443025	49	140	6.79972	14.3225	1.07473
chr17	32811806	32830980	chr17:32811806-32830980	chr17	32948751	32967925	chr17:32948751-32967925	66	140	9.1588	14.3225	0.645051
chrX	169320422	169368178	chrX:169320422-169368178	chrX	165758354	165806110	chrX:165758354-165806110	56	139	7.7711	14.2202	0.871748
chr4	129703660	129713442	chr4:129703660-129713442	chr4	129380904	129390686	chr4:129380904-129390686	66	139	9.1588	14.2202	0.634709
chr8	57487963	57510262	chr8:57487963-57510262	chr8	59966760	59989059	chr8:59966760-59989059	32	138	4.44063	14.1179	1.66869
chr8	57487963	57510268	chr8:57487963-57510268	chr8	59966760	59989065	chr8:59966760-59989065	32	138	4.44063	14.1179	1.66869
chr9	88542408	88570913	chr9:88542408-88570913	chr9	88437246	88465751	chr9:88437246-88465751	81	137	11.2403	14.0156	0.318344
chr7	41599230	41613209	chr7:41599230-41613209	chr7	48854600	48868579	chr7:48854600-48868579	37	136	5.13448	13.9133	1.43817
chr17	33231456	33256580	chr17:33231456-33256580	chr17	33368401	33393525	chr17:33368401-33393525	55	136	7.63233	13.9133	0.866265
chr16	64786425	64814423	chr16:64786425-64814423	chr16	64786251	64814249	chr16:64786251-64814249	56	136	7.7711	13.9133	0.84027
chr17	94750074	94775133	chr17:94750074-94775133	chr17	95149414	95174473	chr17:95149414-95174473	68	136	9.43634	13.9133	0.560162
chr11	59375656	59407105	chr11:59375656-59407105	chr11	59189158	59220607	chr11:59189158-59220607	36	134	4.99571	13.7087	1.45633
chr18	82688923	82703022	chr18:82688923-82703022	chr18	82858315	82872414	chr18:82858315-82872414	49	134	6.79972	13.7087	1.01154
chr7	29860008	29882015	chr7:29860008-29882015	chr7	30645027	30667034	chr7:30645027-30667034	50	134	6.93849	13.7087	0.982395
chr9	24488319	24503118	chr9:24488319-24503118	chr9	24292763	24307562	chr9:24292763-24307562	51	134	7.07726	13.7087	0.953825
chr9	24488319	24503214	chr9:24488319-24503214	chr9	24292763	24307658	chr9:24292763-24307658	51	134	7.07726	13.7087	0.953825
chrX	108835462	108882386	chrX:108835462-108882386	chrX	106030801	106077725	chrX:106030801-106077725	60	134	8.32618	13.7087	0.71936
chr10	82126548	82163624	chr10:82126548-82163624	chr10	81589293	81626369	chr10:81589293-81626369	80	134	11.1016	13.7087	0.304323
chr19	29471859	29521989	chr19:29471859-29521989	chr19	29546349	29596479	chr19:29546349-29596479	96	134	13.3219	13.7087	0.0412883
chr1	82896277	82946626	chr1:82896277-82946626	chr1	82892852	82943201	chr1:82892852-82943201	57	133	7.90987	13.6064	0.782554
chr5	92119476	92137375	chr5:92119476-92137375	chr5	92548502	92566401	chr5:92548502-92566401	82	132	11.3791	13.5041	0.247004
chr17	22725703	22735380	chr17:22725703-22735380	chr17	22862670	22872347	chr17:22862670-22872347	41	131	5.68956	13.4017	1.23603
chr10	81648506	81667880	chr10:81648506-81667880	chr10	81111251	81130625	chr10:81111251-81130625	59	130	8.18741	13.2994	0.699886
chr17	33288249	33312145	chr17:33288249-33312145	chr17	33425194	33449090	chr17:33425194-33449090	68	130	9.43634	13.2994	0.495067
chr1	161034871	161036245	chr1:161034871-161036245	chr1	162965002	162966376	chr1:162965002-162966376	34	129	4.71817	13.1971	1.48393
chr13	67701839	67728613	chr13:67701839-67728613	chr13	67802776	67829550	chr13:67802776-67829550	46	128	6.38341	13.0948	1.0366
chr17	33289544	33307239	chr17:33289544-33307239	chr17	33426489	33444184	chr17:33426489-33444184	68	128	9.43634	13.0948	0.472699
chr9	96769617	96782477	chr9:96769617-96782477	chr9	96670036	96682896	chr9:96670036-96682896	59	126	8.18741	12.8902	0.654798
chr3	96300496	96337770	chr3:96300496-96337770	chr3	96104419	96141693	chr3:96104419-96141693	95	126	13.1831	12.8902	-0.0324141
chr12	116385028	116405102	chr12:116385028-116405102	chr12	117623501	117643575	chr12:117623501-117643575	102	126	14.1545	12.8902	-0.134984
chr6	47742092	47763543	chr6:47742092-47763543	chr6	47692091	47713542	chr6:47692091-47713542	190	126	26.3662	12.8902	-1.03241
chr2	150391690	150440864	chr2:150391690-150440864	chr2	150217426	150266600	chr2:150217426-150266600	48	125	6.66095	12.7879	0.940983
chr8	111953703	111964727	chr8:111953703-111964727	chr8	114477603	114488627	chr8:114477603-114488627	51	125	7.07726	12.7879	0.853521
chr11	95712086	95726635	chr11:95712086-95726635	chr11	95573400	95587949	chr11:95573400-95587949	57	125	7.90987	12.7879	0.693056
chr5	109729457	109794681	chr5:109729457-109794681	chr5	110158476	110223700	chr5:110158476-110223700	74	125	10.269	12.7879	0.316493
chr7	127459610	127470996	chr7:127459610-127470996	chr7	134603124	134614510	chr7:134603124-134614510	90	125	12.4893	12.7879	0.0340928
chr12	71002846	71015888	chr12:71002846-71015888	chr12	72103833	72116875	chr12:72103833-72116875	50	124	6.93849	12.6856	0.870502
chr6	12046976	12087300	chr6:12046976-12087300	chr6	11996976	12037300	chr6:11996976-12037300	73	124	10.1302	12.6856	0.324533
chrX	53047074	53057648	chrX:53047074-53057648	chrX	50400251	50410825	chrX:50400251-50410825	55	123	7.63233	12.5833	0.721316
chr14	61648950	61666498	chr14:61648950-61666498	chr14	62267787	62285335	chr14:62267787-62285335	93	123	12.9056	12.5833	-0.0364827
chr2	158012585	158027759	chr2:158012585-158027759	chr2	157838321	157853495	chr2:157838321-157853495	44	122	6.10587	12.481	1.03147
chr8	126812640	126876438	chr8:126812640-126876438	chr8	129336540	129400338	chr8:129336540-129400338	102	121	14.1545	12.3787	-0.1934
chr11	60914706	60931867	chr11:60914706-60931867	chr11	60728208	60745369	chr11:60728208-60745369	48	120	6.66095	12.2764	0.88209
chr7	43578601	43595508	chr7:43578601-43595508	chr7	50833971	50850878	chr7:50833971-50850878	31	119	4.30186	12.1741	1.50078
chr6	34598562	34662216	chr6:34598562-34662216	chr6	34548562	34612216	chr6:34548562-34612216	17	0	2.35909	0	NA
chr4	146265900	146293424	chr4:146265900-146293424	chr4	146233301	146260825	chr4:146233301-146260825	35	119	4.85694	12.1741	1.3257
chr14	52244550	52258774	chr14:52244550-52258774	chr14	52864225	52878449	chr14:52864225-52878449	39	119	5.41202	12.1741	1.16958
chrX	57374742	57385391	chrX:57374742-57385391	chrX	54627919	54638568	chrX:54627919-54638568	77	119	10.6853	12.1741	0.188193
chr4	147133817	147158541	chr4:147133817-147158541	chr4	146507926	146532650	chr4:146507926-146532650	29	117	4.02432	11.9695	1.57255
chr13	67705306	67729173	chr13:67705306-67729173	chr13	67806243	67830110	chr13:67806243-67830110	47	117	6.52218	11.9695	0.875937
chr10	93087570	93114810	chr10:93087570-93114810	chr10	92550315	92577555	chr10:92550315-92577555	70	117	9.71388	11.9695	0.301243
chr2	175315265	175315830	chr2:175315265-175315830	chr2	175140766	175141331	chr2:175140766-175141331	0	0	0	0	NA
chr5	23857849	23865793	chr5:23857849-23865793	chr5	23363667	23371611	chr5:23363667-23371611	91	117	12.628	11.9695	-0.0772683
chr14	105098172	105111846	chr14:105098172-105111846	chr14	105497389	105511063	chr14:105497389-105511063	51	116	7.07726	11.8672	0.745717
chr5	88566015	88580039	chr5:88566015-88580039	chr5	88995040	89009064	chr5:88995040-89009064	60	116	8.32618	11.8672	0.511252
chr5	149135625	149168374	chr5:149135625-149168374	chr5	149947201	149979950	chr5:149947201-149979950	64	116	8.88126	11.8672	0.418143
chr8	120397002	120484563	chr8:120397002-120484563	chr8	122920902	123008463	chr8:122920902-123008463	275	116	38.1617	11.8672	-1.68515
chr19	23180129	23194286	chr19:23180129-23194286	chr19	23254619	23268776	chr19:23254619-23268776	33	115	4.5794	11.7649	1.36126
chrX	50537389	50562598	chrX:50537389-50562598	chrX	47890566	47915775	chrX:47890566-47915775	56	115	7.7711	11.7649	0.598297
chr7	27807196	27820965	chr7:27807196-27820965	chr7	28592215	28605984	chr7:28592215-28605984	71	115	9.85265	11.7649	0.255905
chr8	69414377	69589476	chr8:69414377-69589476	chr8	71938276	72113375	chr8:71938276-72113375	72	115	9.99142	11.7649	0.235727
chr7	143020021	143048045	chr7:143020021-143048045	chr7	150205926	150233950	chr7:150205926-150233950	32	113	4.44063	11.5603	1.38034
chrX	136781337	136804061	chrX:136781337-136804061	chrX	133315876	133338600	chrX:133315876-133338600	47	113	6.52218	11.5603	0.825752
chr12	17881547	17900687	chr12:17881547-17900687	chr12	17888353	17907493	chr12:17888353-17907493	46	112	6.38341	11.458	0.843955
chr4	137300150	137319699	chr4:137300150-137319699	chr4	136856065	136875614	chr4:136856065-136875614	32	111	4.44063	11.3557	1.35458
chr14	78849184	78915639	chr14:78849184-78915639	chr14	79248991	79315446	chr14:79248991-79315446	44	110	6.10587	11.2534	0.88209
chr8	70139727	70149111	chr8:70139727-70149111	chr8	72663626	72673010	chr8:72663626-72673010	50	110	6.93849	11.2534	0.697665
chr11	69370656	69388230	chr11:69370656-69388230	chr11	69184158	69201732	chr11:69184158-69201732	52	110	7.21603	11.2534	0.641082
chr17	26875498	26887411	chr17:26875498-26887411	chr17	27012443	27024356	chr17:27012443-27024356	57	110	7.90987	11.2534	0.508631
chr10	122973416	122985703	chr10:122973416-122985703	chr10	122410472	122422759	chr10:122410472-122422759	64	109	8.88126	11.1511	0.328346
chr13	70623465	70637634	chr13:70623465-70637634	chr13	70762343	70776512	chr13:70762343-70776512	32	108	4.44063	11.0488	1.31505
chr17	22195509	22225183	chr17:22195509-22225183	chr17	22332476	22362150	chr17:22332476-22362150	39	108	5.41202	11.0488	1.02965
chr11	55501516	55508590	chr11:55501516-55508590	chr11	55315018	55322092	chr11:55315018-55322092	53	108	7.3548	11.0488	0.587129
chr13	62669753	62684918	chr13:62669753-62684918	chr13	62771113	62786278	chr13:62771113-62786278	36	107	4.99571	10.9465	1.1317
chr10	82611856	82622680	chr10:82611856-82622680	chr10	82074601	82085425	chr10:82074601-82085425	35	106	4.85694	10.8442	1.1588
chr6	148214031	148228055	chr6:148214031-148228055	chr6	148162553	148176577	chr6:148162553-148176577	55	106	7.63233	10.8442	0.506722
chr14	115044391	115046728	chr14:115044391-115046728	chr14	115443613	115445950	chr14:115443613-115445950	29	104	4.02432	10.6396	1.40262
chr13	41242605	41284452	chr13:41242605-41284452	chr13	41337974	41379821	chr13:41337974-41379821	65	104	9.02003	10.6396	0.238234
chr7	59307244	59309736	chr7:59307244-59309736	chr7	66562614	66565106	chr7:66562614-66565106	23	103	3.1917	10.5373	1.7231
chr14	78904844	78945345	chr14:78904844-78945345	chr14	79304651	79345152	chr14:79304651-79345152	43	103	5.9671	10.5373	0.820397
chr14	61676013	61682328	chr14:61676013-61682328	chr14	62294850	62301165	chr14:62294850-62301165	71	103	9.85265	10.5373	0.096915
chr6	47750760	47767847	chr6:47750760-47767847	chr6	47700759	47717846	chr6:47700759-47717846	116	103	16.0973	10.5373	-0.611319
chr11	97644126	97660339	chr11:97644126-97660339	chr11	97505440	97521653	chr11:97505440-97521653	32	101	4.44063	10.3326	1.21837
chr11	97644126	97660960	chr11:97644126-97660960	chr11	97505440	97522274	chr11:97505440-97522274	34	101	4.71817	10.3326	1.13091
chrX	20978468	21014845	chrX:20978468-21014845	chrX	20555594	20591971	chrX:20555594-20591971	39	101	5.41202	10.3326	0.932971
chr17	17344743	17345493	chr17:17344743-17345493	chr17	17481707	17482457	chr17:17481707-17482457	46	101	6.38341	10.3326	0.694811
chr2	50296810	50433967	chr2:50296810-50433967	chr2	50152330	50289487	chr2:50152330-50289487	56	101	7.7711	10.3326	0.411018
chr4	12232029	12248578	chr4:12232029-12248578	chr4	12159176	12175725	chr4:12159176-12175725	57	100	7.90987	10.2303	0.371128
chr11	3642138	3646885	chr11:3642138-3646885	chr11	3542141	3546888	chr11:3542141-3546888	58	100	8.04864	10.2303	0.346037
chr7	27993191	28015390	chr7:27993191-28015390	chr7	28778210	28800409	chr7:28778210-28800409	26	99	3.60801	10.128	1.48908
chr1	171320604	171329175	chr1:171320604-171329175	chr1	173250735	173259306	chr1:173250735-173259306	33	98	4.5794	10.0257	1.13048
chr19	57352026	57360675	chr19:57352026-57360675	chr19	57426516	57435165	chr19:57426516-57435165	73	98	10.1302	10.0257	-0.0149531
chrX	36820506	36848505	chrX:36820506-36848505	chrX	34360501	34388500	chrX:34360501-34388500	43	97	5.9671	9.92343	0.73381
chr10	4388291	4396424	chr10:4388291-4396424	chr10	5950117	5958250	chr10:5950117-5958250	46	97	6.38341	9.92343	0.636512
chr7	81524063	81533160	chr7:81524063-81533160	chr7	88668949	88678046	chr7:88668949-88678046	50	97	6.93849	9.92343	0.516218
chr9	88439108	88447532	chr9:88439108-88447532	chr9	88333946	88342370	chr9:88333946-88342370	69	97	9.57511	9.92343	0.05155
chr11	53783418	53859229	chr11:53783418-53859229	chr11	53596920	53672731	chr11:53596920-53672731	77	97	10.6853	9.92343	-0.106712
chr10	67297406	67418927	chr10:67297406-67418927	chr10	66760154	66881675	chr10:66760154-66881675	107	97	14.8484	9.92343	-0.581393
chr14	66966398	66977986	chr14:66966398-66977986	chr14	67585235	67596823	chr14:67585235-67596823	33	96	4.5794	9.82113	1.10073
chr5	135674581	135684982	chr5:135674581-135684982	chr5	136150451	136160852	chr5:136150451-136160852	35	96	4.85694	9.82113	1.01584
chr17	3103175	3114885	chr17:3103175-3114885	chr17	3103175	3114885	chr17:3103175-3114885	41	96	5.68956	9.82113	0.787572
chr8	20291708	20293819	chr8:20291708-20293819	chr8	19887286	19889397	chr8:19887286-19889397	33	95	4.5794	9.71883	1.08562
chr5	110073632	110093456	chr5:110073632-110093456	chr5	110502651	110522475	chr5:110502651-110522475	53	95	7.3548	9.71883	0.402097
chr9	35305084	35305761	chr9:35305084-35305761	chr9	35112669	35113346	chr9:35112669-35113346	245	95	33.9986	9.71883	-1.80662
chr6	82658230	82719029	chr6:82658230-82719029	chr6	82608224	82669023	chr6:82608224-82669023	40	94	5.55079	9.61652	0.792822
chr3	63869450	63899373	chr3:63869450-63899373	chr3	63673372	63703295	chr3:63673372-63703295	51	94	7.07726	9.61652	0.442325
chr8	46670356	46739425	chr8:46670356-46739425	chr8	47755710	47824779	chr8:47755710-47824779	54	93	7.49356	9.51422	0.344433
chr12	4409026	4437251	chr12:4409026-4437251	chr12	4409026	4437250	chr12:4409026-4437250	55	93	7.63233	9.51422	0.317961
chr2	181289394	181304368	chr2:181289394-181304368	chr2	181024099	181039073	chr2:181024099-181039073	74	93	10.269	9.51422	-0.110133
chr6	31836293	31836599	chr6:31836293-31836599	chr6	31786293	31786599	chr6:31786293-31786599	2	0	0.277539	0	NA
chr3	88519224	88531848	chr3:88519224-88531848	chr3	88323146	88335770	chr3:88323146-88335770	26	92	3.60801	9.41191	1.38328
chr4	156211542	156234591	chr4:156211542-156234591	chr4	155585651	155608700	chr4:155585651-155608700	44	92	6.10587	9.41191	0.624292
chrX	78567875	78583984	chrX:78567875-78583984	chrX	75813214	75829323	chrX:75813214-75829323	45	92	6.24464	9.41191	0.59187
chr10	81703006	81773655	chr10:81703006-81773655	chr10	81165751	81236400	chr10:81165751-81236400	50	92	6.93849	9.41191	0.439867
chr11	16931923	16951118	chr11:16931923-16951118	chr11	16831926	16851121	chr11:16831926-16851121	53	92	7.3548	9.41191	0.355803
chr8	20418992	20421095	chr8:20418992-20421095	chr8	20014570	20016673	chr8:20014570-20016673	55	92	7.63233	9.41191	0.302364
chr10	93335981	93348877	chr10:93335981-93348877	chr10	92798726	92811622	chr10:92798726-92811622	42	91	5.82833	9.30961	0.675639
chr17	70853611	70880543	chr17:70853611-70880543	chr17	71202951	71229883	chr17:71202951-71229883	58	91	8.04864	9.30961	0.209975
chr3	52086770	52087859	chr3:52086770-52087859	chr3	51890692	51891781	chr3:51890692-51891781	19	90	2.63662	9.20731	1.80409
chr5	136935992	136937140	chr5:136935992-136937140	chr5	137411862	137413010	chr5:137411862-137413010	20	90	2.77539	9.20731	1.73009
chr9	97063649	97073148	chr9:97063649-97073148	chr9	96964068	96973567	chr9:96964068-96973567	59	90	8.18741	9.20731	0.169372
chr18	35808280	35826910	chr18:35808280-35826910	chr18	35967934	35986564	chr18:35967934-35986564	51	89	7.07726	9.105	0.36347
chr8	64825376	64836102	chr8:64825376-64836102	chr8	67349276	67360000	chr8:67349276-67360000	28	88	3.88555	9.0027	1.21224
chr3	69063272	69072206	chr3:69063272-69072206	chr3	68867194	68876128	chr3:68867194-68876128	34	88	4.71817	9.0027	0.93213
chr10	16951094	16990457	chr10:16951094-16990457	chr10	16670900	16710263	chr10:16670900-16710263	38	88	5.27325	9.0027	0.771666
chr15	84906642	84922984	chr15:84906642-84922984	chr15	84737072	84753414	chr15:84737072-84753414	48	88	6.66095	9.0027	0.434631
chr15	84906642	84923083	chr15:84906642-84923083	chr15	84737072	84753513	chr15:84737072-84753513	48	88	6.66095	9.0027	0.434631
chr11	16934709	16951122	chr11:16934709-16951122	chr11	16834712	16851125	chr11:16834712-16851125	53	88	7.3548	9.0027	0.291673
chr5	121334411	121342805	chr5:121334411-121342805	chr5	121784420	121792814	chr5:121784420-121792814	31	87	4.30186	8.9004	1.04891
chr8	46728134	46739515	chr8:46728134-46739515	chr8	47813488	47824869	chr8:47813488-47824869	34	87	4.71817	8.9004	0.915642
chr15	76410146	76423837	chr15:76410146-76423837	chr15	76240576	76254267	chr15:76240576-76254267	37	87	5.13448	8.9004	0.793652
chr7	127477194	127483225	chr7:127477194-127483225	chr7	134620708	134626739	chr7:134620708-134626739	44	87	6.10587	8.9004	0.543673
chr19	5834118	5835940	chr19:5834118-5835940	chr19	5834118	5835940	chr19:5834118-5835940	34	86	4.71817	8.79809	0.898964
chr8	69553929	69585135	chr8:69553929-69585135	chr8	72077828	72109034	chr8:72077828-72109034	43	86	5.9671	8.79809	0.560162
chr12	21542990	21562689	chr12:21542990-21562689	chr12	21548851	21568550	chr12:21548851-21568550	26	85	3.60801	8.69579	1.26911
chr10	81863231	81889530	chr10:81863231-81889530	chr10	81325976	81352275	chr10:81325976-81352275	47	85	6.52218	8.69579	0.414964
chr17	6601671	6607525	chr17:6601671-6607525	chr17	6806388	6812243	chr17:6806388-6812243	48	85	6.66095	8.69579	0.38459
chr10	82354250	82400865	chr10:82354250-82400865	chr10	81816995	81863610	chr10:81816995-81863610	51	85	7.07726	8.69579	0.297127
chr14	25274167	25388670	chr14:25274167-25388670	chr14	26093653	26208156	chr14:26093653-26208156	79	85	10.9628	8.69579	-0.334228
chr15	83450794	83454361	chr15:83450794-83454361	chr15	83281224	83284791	chr15:83281224-83284791	20	84	2.77539	8.59349	1.63055
chr17	85019150	85028024	chr17:85019150-85028024	chr17	85418490	85427364	chr17:85418490-85427364	23	84	3.1917	8.59349	1.42892
chr5	109753826	109799326	chr5:109753826-109799326	chr5	110182845	110228345	chr5:110182845-110228345	30	84	4.16309	8.59349	1.04559
chr3	19893700	19922899	chr3:19893700-19922899	chr3	19793700	19822899	chr3:19793700-19822899	45	84	6.24464	8.59349	0.460626
chr6	47757765	47764575	chr6:47757765-47764575	chr6	47707764	47714574	chr6:47707764-47714574	95	84	13.1831	8.59349	-0.617377
chr17	27566237	27579361	chr17:27566237-27579361	chr17	27703182	27716306	chr17:27703182-27716306	21	83	2.91416	8.49118	1.54288
chr15	62259011	62260215	chr15:62259011-62260215	chr15	62090566	62091770	chr15:62090566-62091770	27	83	3.74678	8.49118	1.18031
chr6	35251799	35267831	chr6:35251799-35267831	chr6	35201799	35217831	chr6:35201799-35217831	28	83	3.88555	8.49118	1.12785
chr17	14964019	14978666	chr17:14964019-14978666	chr17	15100983	15115630	chr17:15100983-15115630	47	83	6.52218	8.49118	0.380612
chr2	177089938	177122224	chr2:177089938-177122224	chr2	176874643	176906929	chr2:176874643-176906929	57	82	7.90987	8.38888	0.0848236
chr6	37782926	37834092	chr6:37782926-37834092	chr6	37732926	37784092	chr6:37732926-37784092	22	81	3.05293	8.28658	1.44058
chr16	59556350	59603350	chr16:59556350-59603350	chr16	59556176	59603176	chr16:59556176-59603176	24	81	3.33047	8.28658	1.31505
chr16	59557295	59602244	chr16:59557295-59602244	chr16	59557121	59602070	chr16:59557121-59602070	24	81	3.33047	8.28658	1.31505
chr3	35933045	35942716	chr3:35933045-35942716	chr3	35831967	35841638	chr3:35831967-35841638	32	81	4.44063	8.28658	0.900012
chr11	103017661	103027610	chr11:103017661-103027610	chr11	102878975	102888924	chr11:102878975-102888924	35	81	4.85694	8.28658	0.770729
chr3	93346698	93380446	chr3:93346698-93380446	chr3	93150620	93184368	chr3:93150620-93184368	53	81	7.3548	8.28658	0.172091
chr4	117117769	117125218	chr4:117117769-117125218	chr4	116790374	116797823	chr4:116790374-116797823	30	80	4.16309	8.18427	0.975199
chr8	69367712	69400317	chr8:69367712-69400317	chr8	71891611	71924216	chr8:71891611-71924216	36	80	4.99571	8.18427	0.712165
chr5	53904028	53916302	chr5:53904028-53916302	chr5	54295267	54307541	chr5:54295267-54307541	57	80	7.90987	8.18427	0.0491997
chr11	58323381	58330327	chr11:58323381-58330327	chr11	58136883	58143829	chr11:58136883-58143829	33	79	4.5794	8.08197	0.819548
chr6	31033013	31059987	chr6:31033013-31059987	chr6	30983013	31009987	chr6:30983013-31009987	35	79	4.85694	8.08197	0.734659
chr6	67044073	67084847	chr6:67044073-67084847	chr6	66994067	67034841	chr6:66994067-67034841	38	79	5.27325	8.08197	0.616015
chr16	4525148	4542122	chr16:4525148-4542122	chr16	4525148	4542122	chr16:4525148-4542122	38	79	5.27325	8.08197	0.616015
chr6	31317613	31343337	chr6:31317613-31343337	chr6	31267613	31293337	chr6:31267613-31293337	40	79	5.55079	8.08197	0.542014
chr8	70139693	70147255	chr8:70139693-70147255	chr8	72663592	72671154	chr8:72663592-72671154	32	78	4.44063	7.97967	0.845564
chr4	146156875	146181724	chr4:146156875-146181724	chr4	146124276	146149125	chr4:146124276-146149125	35	78	4.85694	7.97967	0.716281
chr1	181212526	181233075	chr1:181212526-181233075	chr1	183142657	183163206	chr1:183142657-183163206	36	78	4.99571	7.97967	0.675639
chr2	150266210	150294046	chr2:150266210-150294046	chr2	150091946	150119782	chr2:150091946-150119782	40	78	5.55079	7.97967	0.523636
chr1	161003849	161014248	chr1:161003849-161014248	chr1	162933980	162944379	chr1:162933980-162944379	28	77	3.88555	7.87736	1.01959
chr18	82692949	82706174	chr18:82692949-82706174	chr18	82862341	82875566	chr18:82862341-82875566	28	76	3.88555	7.77506	1.00073
chr2	104800287	104819011	chr2:104800287-104819011	chr2	104640444	104659168	chr2:104640444-104659168	42	76	5.82833	7.77506	0.415772
chr7	127636328	127697077	chr7:127636328-127697077	chr7	134779842	134840591	chr7:134779842-134840591	55	76	7.63233	7.77506	0.0267294
chr4	117119215	117125658	chr4:117119215-117125658	chr4	116791820	116798263	chr4:116791820-116798263	26	75	3.60801	7.67276	1.08854
chr7	81523550	81529554	chr7:81523550-81529554	chr7	88668436	88674440	chr7:88668436-88674440	38	75	5.27325	7.67276	0.541053
chr5	124628295	124647758	chr5:124628295-124647758	chr5	125078876	125098339	chr5:125078876-125098339	42	75	5.82833	7.67276	0.396663
chr14	78849496	78890193	chr14:78849496-78890193	chr14	79249303	79290000	chr14:79249303-79290000	31	74	4.30186	7.57045	0.815419
chr6	83417440	83420992	chr6:83417440-83420992	chr6	83367434	83370986	chr6:83367434-83370986	27	73	3.74678	7.46815	0.995099
chr5	107474307	107496856	chr5:107474307-107496856	chr5	107903326	107925875	chr5:107903326-107925875	28	73	3.88555	7.46815	0.942631
chr9	81644229	81689620	chr9:81644229-81689620	chr9	81537836	81583227	chr9:81537836-81583227	28	73	3.88555	7.46815	0.942631
chr12	110585885	110600268	chr12:110585885-110600268	chr12	111824095	111838478	chr12:111824095-111838478	31	73	4.30186	7.46815	0.79579
chr7	25417434	25439538	chr7:25417434-25439538	chr7	26202453	26224557	chr7:26202453-26224557	32	73	4.44063	7.46815	0.749986
chr19	53936914	53944488	chr19:53936914-53944488	chr19	54011404	54018978	chr19:54011404-54018978	32	73	4.44063	7.46815	0.749986
chr19	53936914	53944653	chr19:53936914-53944653	chr19	54011404	54019143	chr19:54011404-54019143	32	73	4.44063	7.46815	0.749986
chr13	93412923	93433980	chr13:93412923-93433980	chr13	94182878	94203935	chr13:94182878-94203935	42	73	5.82833	7.46815	0.357669
chr11	16938585	16950930	chr11:16938585-16950930	chr11	16838588	16850933	chr11:16838588-16850933	44	73	6.10587	7.46815	0.290555
chr14	32301925	32317985	chr14:32301925-32317985	chr14	33115111	33131171	chr14:33115111-33131171	51	73	7.07726	7.46815	0.0775608
chr10	94671025	94688576	chr10:94671025-94688576	chr10	94133770	94151321	chr10:94133770-94151321	17	72	2.35909	7.36585	1.64262
chr2	177462371	177487320	chr2:177462371-177487320	chr2	177247076	177272025	chr2:177247076-177272025	50	72	6.93849	7.36585	0.0862304
chr7	4877053	4892111	chr7:4877053-4892111	chr7	4828655	4843713	chr7:4828655-4843713	19	71	2.63662	7.26354	1.46198
chr6	136463905	136474804	chr6:136463905-136474804	chr6	136412426	136423325	chr6:136412426-136423325	25	71	3.46924	7.26354	1.06605
chr5	35551261	35556848	chr5:35551261-35556848	chr5	35893910	35899497	chr5:35893910-35899497	32	71	4.44063	7.26354	0.709909
chr6	127641162	127669127	chr6:127641162-127669127	chr6	127591180	127619145	chr6:127591180-127619145	35	71	4.85694	7.26354	0.580626
chr4	89421848	89463490	chr4:89421848-89463490	chr4	89088539	89130181	chr4:89088539-89130181	62	71	8.60372	7.26354	-0.244288
chr6	133104008	133119832	chr6:133104008-133119832	chr6	133054026	133069850	chr6:133054026-133069850	68	71	9.43634	7.26354	-0.377554
chr3	70777485	70810934	chr3:70777485-70810934	chr3	70581407	70614856	chr3:70581407-70614856	29	70	4.02432	7.16124	0.831464
chr2	72980887	72988836	chr2:72980887-72988836	chr2	72818944	72826893	chr2:72818944-72826893	38	70	5.27325	7.16124	0.441517
chr6	116173626	116174532	chr6:116173626-116174532	chr6	116123644	116124550	chr6:116123644-116124550	38	70	5.27325	7.16124	0.441517
chr14	78912176	78934644	chr14:78912176-78934644	chr14	79311983	79334451	chr14:79311983-79334451	25	69	3.46924	7.05894	1.02483
chr10	95385813	95411487	chr10:95385813-95411487	chr10	94848447	94874121	chr10:94848447-94874121	33	69	4.5794	7.05894	0.624292
chr2	175157100	175180324	chr2:175157100-175180324	chr2	174982601	175005825	chr2:174982601-175005825	42	69	5.82833	7.05894	0.276369
chr13	93412923	93433897	chr13:93412923-93433897	chr13	94182878	94203852	chr13:94182878-94203852	42	69	5.82833	7.05894	0.276369
chr5	74091361	74101403	chr5:74091361-74101403	chr5	74487386	74497428	chr5:74487386-74497428	47	69	6.52218	7.05894	0.114097
chr18	36310477	36329456	chr18:36310477-36329456	chr18	36470131	36489110	chr18:36470131-36489110	63	69	8.74249	7.05894	-0.308594
chrX	150511031	150515493	chrX:150511031-150515493	chrX	146945574	146950036	chrX:146945574-146950036	38	68	5.27325	6.95663	0.399697
chr11	22759728	22799424	chr11:22759728-22799424	chr11	22659731	22699427	chr11:22659731-22699427	43	68	5.9671	6.95663	0.22136
chr4	146151661	146172229	chr4:146151661-146172229	chr4	146119062	146139630	chr4:146119062-146139630	27	67	3.74678	6.85433	0.871363
chr2	126675916	126684290	chr2:126675916-126684290	chr2	126501652	126510026	chr2:126501652-126510026	37	67	5.13448	6.85433	0.416797
chr8	57653504	57668033	chr8:57653504-57668033	chr8	60132301	60146830	chr8:60132301-60146830	45	67	6.24464	6.85433	0.134398
chr12	12761723	12843170	chr12:12761723-12843170	chr12	12768529	12849976	chr12:12768529-12849976	45	67	6.24464	6.85433	0.134398
chr5	52193378	52204202	chr5:52193378-52204202	chr5	52584617	52595441	chr5:52584617-52595441	46	67	6.38341	6.85433	0.102689
chr14	26014965	26027514	chr14:26014965-26027514	chr14	26834451	26847000	chr14:26834451-26847000	16	66	2.22032	6.75203	1.60456
chr1	15844698	15852996	chr1:15844698-15852996	chr1	15834779	15843077	chr1:15834779-15843077	17	66	2.35909	6.75203	1.51709
chr15	98025611	98037476	chr15:98025611-98037476	chr15	97856042	97867907	chr15:97856042-97867907	21	66	2.91416	6.75203	1.21224
chr5	109668482	109689456	chr5:109668482-109689456	chr5	110097501	110118475	chr5:110097501-110118475	24	66	3.33047	6.75203	1.01959
chr10	77235596	77236140	chr10:77235596-77236140	chr10	76698341	76698885	chr10:76698341-76698885	24	66	3.33047	6.75203	1.01959
chr1	180250801	180255975	chr1:180250801-180255975	chr1	182180932	182186106	chr1:182180932-182186106	26	66	3.60801	6.75203	0.904116
chr4	33251944	33291414	chr4:33251944-33291414	chr4	33338919	33378389	chr4:33338919-33378389	26	66	3.60801	6.75203	0.904116
chr2	175039560	175040080	chr2:175039560-175040080	chr2	174865061	174865581	chr2:174865061-174865581	0	0	0	0	NA
chr2	10316023	10365964	chr2:10316023-10365964	chr2	10237650	10287591	chr2:10237650-10287591	31	66	4.30186	6.75203	0.650359
chr11	22781798	22807772	chr11:22781798-22807772	chr11	22681801	22707775	chr11:22681801-22707775	43	66	5.9671	6.75203	0.178291
chr4	99876235	99926270	chr4:99876235-99926270	chr4	99548802	99598875	chr4:99548802-99598875	44	66	6.10587	6.75203	0.145124
chr8	105629572	105635772	chr8:105629572-105635772	chr8	108153472	108159672	chr8:108153472-108159672	44	66	6.10587	6.75203	0.145124
chr13	64280168	64314042	chr13:64280168-64314042	chr13	64381476	64415350	chr13:64381476-64415350	30	65	4.16309	6.64972	0.675639
chr17	88066961	88095835	chr17:88066961-88095835	chr17	88466301	88495175	chr17:88466301-88495175	42	65	5.82833	6.64972	0.190212
chr13	62602615	62624184	chr13:62602615-62624184	chr13	62703975	62725544	chr13:62703975-62725544	42	64	5.82833	6.54742	0.167844
chr1	53158575	53187617	chr1:53158575-53187617	chr1	53215419	53244461	chr1:53215419-53244461	21	63	2.91416	6.44512	1.14512
chr15	76034951	76046111	chr15:76034951-76046111	chr15	75865381	75876541	chr15:75865381-75876541	21	63	2.91416	6.44512	1.14512
chr3	9401053	9415202	chr3:9401053-9415202	chr3	9401053	9415202	chr3:9401053-9415202	13	62	1.80401	6.34281	1.81392
chr15	82206952	82217695	chr15:82206952-82217695	chr15	82037382	82048125	chr15:82037382-82048125	24	62	3.33047	6.34281	0.929395
chr19	7384236	7400335	chr19:7384236-7400335	chr19	7458726	7474825	chr19:7458726-7474825	30	62	4.16309	6.34281	0.607467
chr11	120232863	120236308	chr11:120232863-120236308	chr11	120094177	120097622	chr11:120094177-120097622	32	62	4.44063	6.34281	0.514358
chr17	35993773	36000672	chr17:35993773-36000672	chr17	36130718	36137617	chr17:36130718-36137617	35	62	4.85694	6.34281	0.385075
chr17	31898806	31919055	chr17:31898806-31919055	chr17	32035751	32056000	chr17:32035751-32056000	43	62	5.9671	6.34281	0.0880932
chr13	107022468	107033521	chr13:107022468-107033521	chr13	107812548	107823601	chr13:107812548-107823601	27	61	3.74678	6.24051	0.736011
chr5	135653810	135672990	chr5:135653810-135672990	chr5	136129680	136148860	chr5:136129680-136148860	34	61	4.71817	6.24051	0.403436
chrX	53054793	53057193	chrX:53054793-53057193	chrX	50407970	50410370	chrX:50407970-50410370	36	61	4.99571	6.24051	0.320974
chrX	101462707	101482206	chrX:101462707-101482206	chrX	98658046	98677545	chrX:98658046-98677545	47	61	6.52218	6.24051	-0.0636899
chr8	25755681	25762030	chr8:25755681-25762030	chr8	26866153	26872502	chr8:26866153-26872502	48	61	6.66095	6.24051	-0.0940636
chr8	117211634	117212987	chr8:117211634-117212987	chr8	119735534	119736887	chr8:119735534-119736887	14	60	1.94278	6.13821	1.6597
chr1	58383512	58392783	chr1:58383512-58392783	chr1	58440356	58449627	chr1:58440356-58449627	17	60	2.35909	6.13821	1.37959
chr4	11966565	11994296	chr4:11966565-11994296	chr4	11893712	11921443	chr4:11893712-11921443	22	60	3.05293	6.13821	1.00762
chr7	137372163	137412049	chr7:137372163-137412049	chr7	144563846	144603732	chr7:144563846-144603732	24	60	3.33047	6.13821	0.88209
chr3	51334722	51342771	chr3:51334722-51342771	chr3	51138644	51146693	chr3:51138644-51146693	25	60	3.46924	6.13821	0.823196
chr4	44169126	44236300	chr4:44169126-44236300	chr4	44181998	44249172	chr4:44181998-44249172	36	60	4.99571	6.13821	0.297127
chr3	100559090	100566048	chr3:100559090-100566048	chr3	100363013	100369971	chr3:100363013-100369971	37	60	5.13448	6.13821	0.257599
chr8	105629572	105635446	chr8:105629572-105635446	chr8	108153472	108159346	chr8:108153472-108159346	42	60	5.82833	6.13821	0.0747348
chr17	94856386	94873085	chr17:94856386-94873085	chr17	95255726	95272425	chr17:95255726-95272425	18	59	2.49785	6.0359	1.27288
chr16	97997128	98009005	chr16:97997128-98009005	chr16	98218293	98230170	chr16:98218293-98230170	21	59	2.91416	6.0359	1.05049
chr5	22552208	22566657	chr5:22552208-22566657	chr5	22058026	22072475	chr5:22058026-22072475	23	59	3.1917	6.0359	0.919243
chr1	132986774	132987047	chr1:132986774-132987047	chr1	134883351	134883624	chr1:134883351-134883624	29	59	4.02432	6.0359	0.584824
chr3	95639654	95658621	chr3:95639654-95658621	chr3	95443576	95462543	chr3:95443576-95462543	35	59	4.85694	6.0359	0.313522
chr6	127638207	127659731	chr6:127638207-127659731	chr6	127588225	127609749	chr6:127588225-127609749	39	59	5.41202	6.0359	0.157402
chr14	43635675	43752543	chr14:43635675-43752543	chr14	44213340	44330208	chr14:44213340-44330208	40	59	5.55079	6.0359	0.120877
chr9	97047444	97067307	chr9:97047444-97067307	chr9	96947863	96967726	chr9:96947863-96967726	43	59	5.9671	6.0359	0.0165399
chr17	3291594	3309291	chr17:3291594-3309291	chr17	3291594	3309291	chr17:3291594-3309291	44	59	6.10587	6.0359	-0.016627
chr19	59423701	59456900	chr19:59423701-59456900	chr19	59498191	59531390	chr19:59498191-59531390	49	59	6.79972	6.0359	-0.171905
chr6	31051657	31052219	chr6:31051657-31052219	chr6	31001657	31002219	chr6:31001657-31002219	0	2	0	0.204607	NA
chr5	105692824	105698173	chr5:105692824-105698173	chr5	106121843	106127192	chr5:106121843-106127192	20	58	2.77539	5.9336	1.09621
chr7	137375569	137410757	chr7:137375569-137410757	chr7	144567252	144602440	chr7:144567252-144602440	20	58	2.77539	5.9336	1.09621
chr6	57633957	57674222	chr6:57633957-57674222	chr6	57583951	57624216	chr6:57583951-57624216	22	58	3.05293	5.9336	0.958711
chr6	30177176	30178051	chr6:30177176-30178051	chr6	30127176	30128051	chr6:30127176-30128051	0	0	0	0	NA
chr12	4463228	4475914	chr12:4463228-4475914	chr12	4470106	4482792	chr12:4470106-4482792	22	58	3.05293	5.9336	0.958711
chr2	174266604	174281203	chr2:174266604-174281203	chr2	174092105	174106704	chr2:174092105-174106704	7	0	0.971388	0	NA
chr6	28921319	28921776	chr6:28921319-28921776	chr6	28871319	28871776	chr6:28871319-28871776	2	0	0.277539	0	NA
chr12	80116586	80132923	chr12:80116586-80132923	chr12	81217573	81233910	chr12:81217573-81233910	22	58	3.05293	5.9336	0.958711
chr5	31560451	31569072	chr5:31560451-31569072	chr5	31862824	31871445	chr5:31862824-31871445	24	58	3.33047	5.9336	0.83318
chr18	90580709	90602633	chr18:90580709-90602633	chr18	90750101	90772025	chr18:90750101-90772025	25	58	3.46924	5.9336	0.774286
chr2	174263050	174283924	chr2:174263050-174283924	chr2	174088551	174109425	chr2:174088551-174109425	9	0	1.24893	0	NA
chr12	20235039	20429457	chr12:20235039-20429457	chr12	20240894	20435318	chr12:20240894-20435318	107	58	14.8484	5.9336	-1.32332
chr13	48481189	48486263	chr13:48481189-48486263	chr13	48576558	48581632	chr13:48576558-48581632	25	57	3.46924	5.8313	0.749195
chr13	48481189	48486467	chr13:48481189-48486467	chr13	48576558	48581836	chr13:48576558-48581836	27	57	3.74678	5.8313	0.638164
chr8	77531677	77547926	chr8:77531677-77547926	chr8	80055576	80071825	chr8:80055576-80071825	29	57	4.02432	5.8313	0.535071
chrX	20962075	20986302	chrX:20962075-20986302	chrX	20539201	20563428	chrX:20539201-20563428	29	57	4.02432	5.8313	0.535071
chr17	5795894	5835243	chr17:5795894-5835243	chr17	5795894	5835243	chr17:5795894-5835243	32	57	4.44063	5.8313	0.393052
chr12	80120546	80131043	chr12:80120546-80131043	chr12	81221533	81232030	chr12:81221533-81232030	20	56	2.77539	5.72899	1.04559
chrX	12116307	12116782	chrX:12116307-12116782	chrX	11693433	11693908	chrX:11693433-11693908	13	55	1.80401	5.62669	1.64108
chr6	83455175	83455298	chr6:83455175-83455298	chr6	83405169	83405292	chr6:83405169-83405292	14	55	1.94278	5.62669	1.53417
chr18	56964782	56975256	chr18:56964782-56975256	chr18	57124436	57134910	chr18:57124436-57134910	22	55	3.05293	5.62669	0.88209
chr6	28920221	28920692	chr6:28920221-28920692	chr6	28870221	28870692	chr6:28870221-28870692	0	0	0	0	NA
chr9	20980124	20995498	chr9:20980124-20995498	chr9	20784568	20799942	chr9:20784568-20799942	24	55	3.33047	5.62669	0.756559
chr9	75468217	75496594	chr9:75468217-75496594	chr9	75316024	75344401	chr9:75316024-75344401	26	55	3.60801	5.62669	0.641082
chr3	100559090	100565539	chr3:100559090-100565539	chr3	100363013	100369462	chr3:100363013-100369462	33	55	4.5794	5.62669	0.297127
chr14	20618699	20645433	chr14:20618699-20645433	chr14	21437921	21464655	chr14:21437921-21464655	33	55	4.5794	5.62669	0.297127
chr6	66266682	66284481	chr6:66266682-66284481	chr6	66216676	66234475	chr6:66216676-66234475	55	55	7.63233	5.62669	-0.439838
chr12	51843881	51871005	chr12:51843881-51871005	chr12	52944868	52971992	chr12:52944868-52971992	34	54	4.71817	5.52438	0.227586
chr8	26148606	26157780	chr8:26148606-26157780	chr8	27259078	27268252	chr8:27259078-27268252	39	54	5.41202	5.52438	0.0296469
chr2	104750437	104766061	chr2:104750437-104766061	chr2	104590594	104606218	chr2:104590594-104606218	40	54	5.55079	5.52438	-0.00687898
chr1	6191120	6214219	chr1:6191120-6214219	chr1	6181201	6204300	chr1:6181201-6204300	18	53	2.49785	5.42208	1.11816
chr5	29452395	29468838	chr5:29452395-29468838	chr5	29778935	29795378	chr5:29778935-29795378	19	53	2.63662	5.42208	1.04015
chr5	121598281	121618938	chr5:121598281-121618938	chr5	122048290	122068947	chr5:122048290-122068947	21	53	2.91416	5.42208	0.895765
chr4	132178800	132186627	chr4:132178800-132186627	chr4	131734715	131742542	chr4:131734715-131742542	25	53	3.46924	5.42208	0.644226
chr19	46339253	46344127	chr19:46339253-46344127	chr19	46413743	46418617	chr19:46413743-46418617	26	53	3.60801	5.42208	0.587642
chr11	3648298	3649673	chr11:3648298-3649673	chr11	3548301	3549676	chr11:3548301-3549676	33	53	4.5794	5.42208	0.243688
chr1	180756601	180779200	chr1:180756601-180779200	chr1	182686732	182709331	chr1:182686732-182709331	37	53	5.13448	5.42208	0.0786287
chr15	92367173	92378103	chr15:92367173-92378103	chr15	92197604	92208534	chr15:92197604-92208534	15	52	2.08155	5.31978	1.35371
chr4	99830860	99842034	chr4:99830860-99842034	chr4	99497551	99508725	chr4:99497551-99508725	19	52	2.63662	5.31978	1.01267
chr13	67100154	67113403	chr13:67100154-67113403	chr13	67201090	67214339	chr13:67201090-67214339	20	52	2.77539	5.31978	0.938673
chr15	8513686	8544960	chr15:8513686-8544960	chr15	8463686	8494960	chr15:8463686-8494960	34	52	4.71817	5.31978	0.173138
chr5	74093060	74095405	chr5:74093060-74095405	chr5	74489085	74491430	chr5:74489085-74491430	37	52	5.13448	5.31978	0.051148
[truncated: 1,543 more rows]
